# Supplementary material for: Ethnobotanical, Phytochemical, and Pharmacological Properties of the Subfamily Nepetoideae (Lamiaceae) in Inflammatory Diseases
Source: MDPI journal article supplement (doi:10.3390/plants12213752), 2023-11-02
Supplement: s1 [file s1]

**Table S2.** Pharmacological evaluation of the extracts related to inflammatory processes in species of the Nepetoideae (Lamiaceae) subfamily.

| Species                                            | Plant part(s)                 | Pharmacology activity                                                                                                                                                                                                                                                                                                                                                                                                                                                                                                                                                           | Extract(s)                                                                                            | Reference                                                                               |
|----------------------------------------------------|-------------------------------|---------------------------------------------------------------------------------------------------------------------------------------------------------------------------------------------------------------------------------------------------------------------------------------------------------------------------------------------------------------------------------------------------------------------------------------------------------------------------------------------------------------------------------------------------------------------------------|-------------------------------------------------------------------------------------------------------|-----------------------------------------------------------------------------------------|
| <i>Agastache mexicana</i> Lint. & Epling           | Aerial parts & inflorescences | Antinociceptive effects at 10-1000 mg/kg, i.p. in both neurogenic and inflammatory phases in the formalin test in Wistar rats. Antinociceptive and anti-inflammatory activities in the writhing (ED <sub>50</sub> = 2 mg/kg, i.p.) & formalin (ED <sub>50</sub> = 44 mg/kg i.p.) tests in Swiss albino mice and Wistar rats, respectively. Reduction on the colonic inflammatory cytokines at doses of 3-300 mg/kg, p.o. using the oxazolone-induced colitis model in male BALB/c mice.                                                                                         | Essential oil, hexane, ethyl acetate, & methanol extracts.                                            | González-Ramírez et al., 2012; Verano et al., 2013; González-Ramírez et al., 2021.      |
| <i>Agastache rugosa</i> Kuntze                     | Aerial parts & leaves         | Antioxidant activity using 2,2-difenil-1-picrilhidrazilo (DPPH) with a scavenging concentration fifty (SC <sub>50</sub> = 77.4 ± 1.9 µg/mL). Reduction on the nitric oxide (NO) and nitric oxide synthase (NOS), and down regulation of the mARN of IL-6. NO decrease with an inhibitory concentration fifty (IC <sub>50</sub> ) =7.9 µg/mL, and in the reactive oxygen species (ROS) IC <sub>50</sub> =4.3 µg/mL, NOS IC <sub>50</sub> =30.0 µg/mL. Reduction of DPPH with a SC <sub>50</sub> =2.9 mg/mL; ROS SC <sub>50</sub> =1.4 mg/mL, and NO SC <sub>50</sub> =1.7 mg/mL. | Ethyl acetate, aqueous fermented extract with <i>Lactobacillus rhamnosus</i> HK-9, & aqueous extract. | Kim et al., 2017; Lim et al., 2017; Lee et al., 2020.                                   |
| <i>Asterohyptis stellulata</i> (Benth.) Epling     | Aerial parts                  | Reduction of DPPH, SC <sub>50</sub> = 112.84 ± 3.71 µg/mL. Promotion of skin regeneration in male mice CD-1 et/et line.                                                                                                                                                                                                                                                                                                                                                                                                                                                         | Methanol extract                                                                                      | Álvarez-Santos et al., 2022.                                                            |
| <i>Cedronella canariensis</i> (L.) Webb & Berthel. | Flowers                       | Anti-inflammatory activity in carrageenan-induced edema model in HC/CFLP mice (1000 mg/kg, p.o.).                                                                                                                                                                                                                                                                                                                                                                                                                                                                               | Chloroformic fraction from methanol extract.                                                          | Lopez-García et al., 1991.                                                              |
| <i>Clinopodium bolivianum</i> (Benth.) Kuntze      | Aerial parts                  | Reduction of IL-8 in urothelial cells infected with <i>Escherichia coli</i> .                                                                                                                                                                                                                                                                                                                                                                                                                                                                                                   | Aqueous extract                                                                                       | Mohanty et al., 2017.                                                                   |
| <i>Clinopodium chinense</i> (Benth.) Kuntze        | Whole plant                   | Inhibition on the inflammation induced by LPS-TLR4-NF-κB-iNOS/COX-2 signaling pathway in RAW264.7 cells. Decrease expression of PR, MMP-9, & VEGF. Increase in levels of TXB2 and the expression of VEGF. Oxidative stress inhibition by antioxidant activity.                                                                                                                                                                                                                                                                                                                  | Aqueous extract                                                                                       | Yu et al., 2019; Kim et al., 2020; Li et al., 2020; Li et al., 2022; Wang et al., 2023. |

| Species                                                       | Plant part(s) | Pharmacology activity                                                                                                                                                                                                                                                                                                                                                                                                                                                                                      | Extract(s)                                                                       | Reference                                                                    |
|---------------------------------------------------------------|---------------|------------------------------------------------------------------------------------------------------------------------------------------------------------------------------------------------------------------------------------------------------------------------------------------------------------------------------------------------------------------------------------------------------------------------------------------------------------------------------------------------------------|----------------------------------------------------------------------------------|------------------------------------------------------------------------------|
| <i>Clinopodium gracile</i> (Benth.) Kuntze                    | Aerial parts  | Inhibition of mast cell-derived cells that cause allergic inflammation.                                                                                                                                                                                                                                                                                                                                                                                                                                    | Aqueous extract                                                                  | Park et al., 2010.                                                           |
| <i>Clinopodium polycephalum</i> (Vaniot) C.Y. Wu & S.J. Hsuan | Root & stem   | Anti-inflammatory activity in RAW 264.7 macrophages induced with LPS.                                                                                                                                                                                                                                                                                                                                                                                                                                      | Ethanol extract 70%.                                                             | Liu et al., 2022.                                                            |
| <i>Clinopodium vulgare</i> L.                                 | Flowers       | Modulation of COX-2 inhibitors. Suppresses NF-κB activation by preventing Iκ-B phosphorylation and inhibits the phosphorylation of p38 and SAPK/JNK MAPKs. It down-regulates iNOS expression with a drastic decrease of NO production, inhibits MMP-9 activation, but does not affect COX-2.                                                                                                                                                                                                               | Aqueous extract                                                                  | Petrova et al., 2023; Dobrev, 2021; Amirova et al., 2019; Burk et al., 2009. |
| <i>Coleus amboinicus</i> Lour.                                | Leaves        | Administration reduced cisplatin-induced renal cell damage and an inhibition on the process of kidney fibrosis in Wistar rats. Promote the anti-inflammatory cytokine TGF-β1 and glutathione peroxidase (GPx) concentrations to regulate cell proliferation, apoptosis, chemotaxis, immunity, inflammatory response, and tissue repair (fibrosis) of kidney tissue. It could effectively reduce the blood urea nitrogen, serum creatinine, GPx, & the TGF-β1 concentrations in the uric acid induced rats. | Ethanol extract                                                                  | Sahrial & Solfaine 2019; Solfaine et al. 2021.                               |
| <i>Coleus scutellarioides</i> (L.) Benth.                     | Leaves        | Anti-inflammatory properties of quercetin by inhibiting the production of PGs through inhibition of COX-2 activity.                                                                                                                                                                                                                                                                                                                                                                                        | Hexane & essential oil.                                                          | Mustaricihie et al., 2017; Mustaricihie et al., 2022.                        |
| <i>Collinsonia canadensis</i> L.                              | Aerial parts  | Reduction of the NO concentrations.                                                                                                                                                                                                                                                                                                                                                                                                                                                                        | Thymol & carvacrol.                                                              | Mahomoodall et al., 2021.                                                    |
| <i>Dracocephalum heterophyllum</i> Benth.                     | Whole plant   | Extracts can effectively suppress CD4+ T cell proliferation & prolong the survival and reduced mortality in mice. Rosmarinate, luteolin & diosmetin suppress abnormal CD4+ T-cell proliferation                                                                                                                                                                                                                                                                                                            | Ethanol- ethyl acetate, petroleum ether, ethyl acetate, <i>n</i> -BuOH, & water. | Shi et al. 2016; Bian et al., 2020.                                          |

| Species                                         | Plant part(s)                                       | Pharmacology activity                                                                                                                                                                                                                                                                                                                                                                                                                                                                                                                                                                                                                                                                                 | Extract(s)                                                           | Reference                                                                                            |
|-------------------------------------------------|-----------------------------------------------------|-------------------------------------------------------------------------------------------------------------------------------------------------------------------------------------------------------------------------------------------------------------------------------------------------------------------------------------------------------------------------------------------------------------------------------------------------------------------------------------------------------------------------------------------------------------------------------------------------------------------------------------------------------------------------------------------------------|----------------------------------------------------------------------|------------------------------------------------------------------------------------------------------|
| <i>Dracocephalum forrestii</i> W.W. Sm.         | Whole plant                                         | Ethanol extract and 4-hydroxi-3-methoxyphenylethanol-8-O-[(6-O-siringoil)- $\beta$ -D-glucopiranoside] (1) decrease NO levels in macrophages RAW 264.7. Inhibition of 33.3%-41.6% at 100 $\mu$ g/mL.                                                                                                                                                                                                                                                                                                                                                                                                                                                                                                  | Ethanol extract                                                      | Li et al., 2009.                                                                                     |
| <i>Dracocephalum kotschy</i> Boiss.             | Aerial parts and leafy branches                     | Ethyl acetate extract and apigenin produce anti-inflammatory effects in colitis induced by acetic acid model in male Wistar rats (10-40 mg/kg & 5-20 mg/kg, p.o.). The ethyl acetate extract reduces the expression of iNOS, COX-2, IL-1 $\beta$ , tumor necrosis factor (TNF)- $\alpha$ in LPS-stimulated J774.1 mouse macrophages at 25 $\mu$ g/mL. Prevent hydroxyproline & malondialdehyde increase levels in fibrosis model induced by bleomycin in Wistar rats (20-80 mg/kg, p.o.) Extracts prevent the severity of gastric ulcer induction by indomethacin in male Wistar rats (80 and 40 mg/kg, p.o.)                                                                                         | Ethyl acetate, hydroalcoholic, aqueous extract, & flavonoid extract. | Sandraei et al. 2017; Kalantar et al., 2018; Hosseini-Sharifabad et al, 2021; Minaiyan et al., 2021. |
| <i>Dracocephalum moldavica</i> L.               | Aerial parts                                        | Suppression of PCNA, NF- $\kappa$ B p65, ICAM-1, & CAM-1 in rat vascular smooth muscle cells induced by TNF- $\alpha$ . Tiliarin reduces mRNA of TNF- $\alpha$ , NF- $\kappa$ B, MCP-1 & iNOS at 50 $\mu$ M in macrophages induced by LPS. It suppresses the release of NO & PGE2. Inhibits the mRNA and protein expression level of iNOS & COX-2, respectively. Reduces the release of proinflammatory cytokines such as IL-6, IL-1 $\beta$ in RAW 364.7 cells induced with LPS. Dracocefalumoides A, uncinatona, tricotonoma F, & cariopterissoide C produced inhibition against TNF- $\alpha$ , IL-1 $\beta$ & NO im macrophages RAW 264.7 induced by LPS, IC <sub>50</sub> = 1.12 – 5.84 $\mu$ M. | Ethanol & ethanol-aqueous extracts.                                  | Xing et al., 2013; Shen et al., 2019; Kim et al., 2021; Nie et al., 2021; Sheychenko et al., 2021.   |
| <i>Dracocephalum palmatum</i> Stephan ex Willd. | Aerial parts. The plant's young shoots and flowers. | Anti-inflammatory, diuretic, gastrointestinal improvement, & alcoholism treatment. Cosmosiin possesses anti-inflammatory, insulin mimetic, & cancer preventive activities. Cynaroside produces anti-atherosclerotic, anti-inflammatory, anti-diabetic and cardioprotective effects. Eriodictyol possesses anticancer, antioxidant, antidiabetic, anti-inflammatory, & cytoprotective properties.                                                                                                                                                                                                                                                                                                      | Decoction, infusion, & tincture.                                     | Olennikov et al., 2013; Andreyeva et al., 2020; Chirikova et al., 2021.                              |

| Species                                 | Plant part(s)         | Pharmacology activity                                                                                                                                                                                                                                                                                                                                                                                                                                                                                                                                                                                                                                                                                                                                                                                                                                                                                                                                                                                                                                                                                                                                                    | Extract(s)                                                                                           | Reference                                                                                                                                        |
|-----------------------------------------|-----------------------|--------------------------------------------------------------------------------------------------------------------------------------------------------------------------------------------------------------------------------------------------------------------------------------------------------------------------------------------------------------------------------------------------------------------------------------------------------------------------------------------------------------------------------------------------------------------------------------------------------------------------------------------------------------------------------------------------------------------------------------------------------------------------------------------------------------------------------------------------------------------------------------------------------------------------------------------------------------------------------------------------------------------------------------------------------------------------------------------------------------------------------------------------------------------------|------------------------------------------------------------------------------------------------------|--------------------------------------------------------------------------------------------------------------------------------------------------|
| <i>Dracocephalum rupestre</i> Hance     | Whole plant           | Total phenolic & flavonoids contribute to the high radical-scavenging activity. Fraction EA protects on the hepatic injury by <i>in vivo</i> antioxidant action. Eriodictyol produced neuroprotective effects on memory deficits and neuroinflammation in mice subjected to permanent middle cerebral artery occlusion (pMCAO).                                                                                                                                                                                                                                                                                                                                                                                                                                                                                                                                                                                                                                                                                                                                                                                                                                          | Ethanol-aqueous (EA) from petroleum ether or ethyl acetate extracts                                  | Ferreira et al., 2016; Zhu et al., 2017.                                                                                                         |
| <i>Elsholtzia ciliata</i> (Thunb.) Hyl. | Leaves & aerial parts | Anti-inflammatory activity at 100 mg/kg, p.o. in the formalin test in Swiss Webster mice. Attenuates renal inflammation in renal interstitial fibrosis induced by unilateral ureteral obstruction model in male Sprague Dawley (300 & 500 mg/kg, p.o. for 14 days). Reduction on the levels of proinflammatory cytokines (TNF- $\alpha$ , IL-6) and prostaglandin E2 induced by LPS in mouse macrophages. Luteolin, caffeic acid, vitexin, pedalin, luteolin-7-O- $\beta$ -D-glucopyranoside, apigenin-5-O- $\beta$ -D-glucopyranoside, apigenin-7-O- $\beta$ -D-glucopyranoside, chrysoeriol-7-O- $\beta$ -D-glucopyranoside, 7,3'-methoxy luteolin-6-O- $\beta$ -D-glucopyranoside, 5,6,4'-trihydroxy-7,3'-dimethoxyflavone, 5-hydroxy-6,7-dimethoxyflavone, 4-(E)-caffeoyl-L-threonic acid, 4-O-(E)-p-coumaroyl-L-threonic acid, $\alpha$ -linolenic acid, all of them reduced ROS released in macrophages J774A.1 LPS-induced at 10-2.5 $\mu$ M doses. Inhibits mast cell-mediated allergic inflammatory reactions by suppressing histamine release and proinflammatory cytokine expression, and involvement of calcium, NF- $\kappa$ B & p38 MAPK in these effects. | Hexane, dichloromethane, ethanol, petroleum ether, diethyl ether, ethyl acetate, & aqueous extracts. | Wang et al., 2022; Zhang et al., 2021; Zotsenko et al., 2021; Nguyen et al., 2021; Pudziuelyte et al., 2020; Kim et al., 2016; Kim et al., 2011. |
| <i>Elsholtzia densa</i> Benth.          | Aerial parts          | Anti-inflammatory effects by inhibition of 27.27% at 300 mg/kg, p.o. in the carrageenan induced- edema in Wistar rats. Significant decrease of the secretion of proinflammatory cytokines TNF- $\alpha$ , IL-1 $\beta$ , & IL-6 of 80.93%, 75.33%, & 67.09%, respectively, in serum of Wistar rats.                                                                                                                                                                                                                                                                                                                                                                                                                                                                                                                                                                                                                                                                                                                                                                                                                                                                      | Methanol extract                                                                                     | Zargar et al., 2019.                                                                                                                             |
| <i>Elsholtzia rugulosa</i> Hemsl.       | Aerial parts          | All the isolated compounds were evaluated for the anti-inflammatory activity by assessing the inhibition of LPS-induced NO production in RAW264.7 mouse macrophages. Compounds such as rugulolides A, nepetoidin B, methyl rosmarinat, & syringaresinol, mildly inhibited NO production with IC <sub>50</sub> values ranging from 12.46 to 23.10 $\mu$ M, and others were inactive (IC <sub>50</sub> > 50 $\mu$ M).                                                                                                                                                                                                                                                                                                                                                                                                                                                                                                                                                                                                                                                                                                                                                      | Aqueous-ethanol (70%) extract.,                                                                      | Yang et al., 2021.                                                                                                                               |

| Species                                                               | Plant part(s) | Pharmacology activity                                                                                                                                                                                                                                                                                                                                                                                                                                                                                                                                                                                                                                                                                                                                                          | Extract(s)                                                       | Reference                                                                                   |
|-----------------------------------------------------------------------|---------------|--------------------------------------------------------------------------------------------------------------------------------------------------------------------------------------------------------------------------------------------------------------------------------------------------------------------------------------------------------------------------------------------------------------------------------------------------------------------------------------------------------------------------------------------------------------------------------------------------------------------------------------------------------------------------------------------------------------------------------------------------------------------------------|------------------------------------------------------------------|---------------------------------------------------------------------------------------------|
| <i>Elsoltzia stachyodes</i> (Link) C.Y. Wu                            | Whole plant   | Anti-inflammatory effect observed by $25 \pm 1.08$ inhibition at 200 mg/kg, p.o. in the edema induced with carrageenan in Wistar rats.                                                                                                                                                                                                                                                                                                                                                                                                                                                                                                                                                                                                                                         | Aqueous extract                                                  | Banerjee et al., 2021.                                                                      |
| <i>Elsholtzia stauntonii</i> Benth.                                   | Aerial parts  | Non-toxic extract (class V) according to the Sidorov classification. Antinociceptive and anti-inflammatory effects in the writhing test and edema induced with carrageenan test in a murine model using 100 mg/kg, p.o.                                                                                                                                                                                                                                                                                                                                                                                                                                                                                                                                                        | Ethanol extract                                                  | Zotsenko et al., 2021.                                                                      |
| <i>Elsoltzia splendens</i> Nakai                                      | Aerial parts  | Antinociceptive and anti-inflammatory effects by inhibition of 44.6% using a dosage of 400 mg/kg, p.o. in the croton oil-induced ear edema and 50% in the writhing test in ICR mice. A PGE <sub>2</sub> inhibition was also observed in RAW 264.7 macrophages induced with LPS.                                                                                                                                                                                                                                                                                                                                                                                                                                                                                                | Ethanol extract 75%.                                             | Kim et al., 2003.                                                                           |
| <i>Eplingiella fruticosa</i> (Salzm. ex Benth.) Harl & J.F.B. Pastore | Leaves        | Anti-inflammatory activity was evaluated using the paw oedema model induced by 1% carrageenan.                                                                                                                                                                                                                                                                                                                                                                                                                                                                                                                                                                                                                                                                                 | Ethanol extract 90%.                                             | Andrade et al., 2010; Beserra-Filho et al., 2019.                                           |
| <i>Glechoma hederacea</i> L.                                          | Whole plant   | Inhibition of NO, (IL)-12p70, IL-12p40, & TNF- $\alpha$ in LPS-induced mouse peritoneal macrophages. Anti-inflammatory activity in the luciferase assay in HepG2 cells, where methyl isoferuloyl-7-(3,4-dihydroxyphenyl) lactate reduced NF- $\kappa$ B activation in 45.4% at 20 $\mu$ M; methyl rosmarinate reduced 44.3% & ethyl rosmarinate, benzyl-4'-hydroxy-benzoyl-3'-O- $\beta$ -D-glucopyranoside in 57.0% at 20 $\mu$ M.<br>Inhibition of PPAR- $\alpha$ , PPAR- $\gamma$ , NF- $\kappa$ B, E-selectin, IL-8 in LPS-induced endothelial cells. Protective effect in rat model of induced cholestasis by attenuation of NF- $\kappa$ b & AP-1. Attenuation of NO levels, regulation of iNOS, COX-2, HO-1, & TNF- $\alpha$ in RAW 264.7 macrophages induced with LPS. | Aqueous, ethanol, & methanol destanified extract. Essential oil. | An et al., 2006; Kim et al., 2011; Vogl et al., 2013; Wang et al., 2017; Chou et al., 2018. |
| <i>Glechoma longituba</i> (Nakai) Kuprian.                            | Whole plant   | Apigenin-7-diglucoronide produced attenuation of proinflammatory gene expression in retinas exposed to bright light in BALB/c mice.                                                                                                                                                                                                                                                                                                                                                                                                                                                                                                                                                                                                                                            | Aqueous extract                                                  | Bian et al., 2017.                                                                          |
| <i>Horminum pyrenaicum</i> L.                                         | Root          | Suppression of (IFN- $\gamma$ -)-dependent immunometabolic pathways, tryptophan breakdown via IDO-1, & neopterin formation by GTP-CH-I. Pathways related to inflammatory processes.                                                                                                                                                                                                                                                                                                                                                                                                                                                                                                                                                                                            | Petroleum ether extract                                          | Becker et al., 2018.                                                                        |
| <i>Hoslundia opposita</i> Vahl                                        | Root          | Antinociceptive, anti-inflammatory, & antipyretic effects in Swiss mice and Wistar rats using the writhing test (22.7% inhibition at 100 mg/kg, p.o.), carrageenan-induced edema                                                                                                                                                                                                                                                                                                                                                                                                                                                                                                                                                                                               | Chloroform extract                                               | Olajide et al., 1998.                                                                       |

| Species                                | Plant part(s)          | Pharmacology activity                                                                                                                                                                                                                                                                                                                                                                                                  | Extract(s)                                                                   | Reference                                                                                                                                                      |
|----------------------------------------|------------------------|------------------------------------------------------------------------------------------------------------------------------------------------------------------------------------------------------------------------------------------------------------------------------------------------------------------------------------------------------------------------------------------------------------------------|------------------------------------------------------------------------------|----------------------------------------------------------------------------------------------------------------------------------------------------------------|
|                                        |                        | (76% inhibition at 100 mg/kg, p.o.), and yeast-induced hyperthermia (significant decrease at 100 mg/kg).                                                                                                                                                                                                                                                                                                               |                                                                              |                                                                                                                                                                |
| <i>Hyptis capitata</i> Jacq.           | Leaves & seeds         | The anti-inflammatory potential of the extract by determining their ability to inhibit NO production using LPS activated macrophages, and the effect on the production of TNF- $\alpha$ , & interleukins 1 $\beta$ or 6 (IL-1 $\beta$ & IL-6) in macrophages. Inhibitor of the NO production in <i>in vitro</i> assay.                                                                                                 | 96% ethanol extract. Alkaloids, coumarins, glycosides, flavonoids, quinones. | Castro et al., 2021.                                                                                                                                           |
| <i>Hyptis crenata</i> Pohl ex Benth.   | Leaves & aerial parts. | Reduction of the pro-inflammatory cytokines (IL-6, MCP-1, IFN- $\gamma$ , TNF- $\alpha$ , & IL-12p70) & increase in the anti-inflammatory cytokine IL-10, as well as an inhibitory myeloperoxidase activity.                                                                                                                                                                                                           | Aqueous extract                                                              | De Jesus et al., 2009; Coelho-De-Souza et al., 2021; Alves-Soares et al., 2022; Shipa et al., 2022; De Lima et al., 2023.                                      |
| <i>Hyptis pectinata</i> (L.) Poit.     | Flowers                | Antinociceptive and anti-inflammatory activities in the 2 <sup>nd</sup> phase of the formalin test (37.4% inhibition at 200 mg/kg, p.o.), carrageenan-induced peritonitis (reduction of leukocyte migration $3.97 \times 10^6$ cells/mL at 200 mg/kg, p.o.), & TPA-induced edema ( $0.27 \pm 0.02$ mm decrease at 3.0 mg/ear) in Swiss mice.                                                                           | Dichloromethane fraction from ethanol extract (60%).                         | Santana et al., 2022.                                                                                                                                          |
| <i>Hyptis suaveolens</i> (L.) Poit.    | Leaves                 | Anti-inflammatory activity in the edema induced with carrageenan in albino rats. Suaveolol ID <sub>50</sub> = 0.71 $\mu$ mol/cm <sup>2</sup> & methyl suaveolate ID <sub>50</sub> = 0.60 $\mu$ mol/cm <sup>2</sup> in the TPA-induced edema.                                                                                                                                                                           | Ethanol extract                                                              | Almeida-Bezerra et al., 2022.                                                                                                                                  |
| <i>Hyptis umbrosa</i> Salzm. ex Benth. | Leaves                 | Antinociceptive and anti-inflammatory activity in writhing test by significant inhibition at 100-400 mg/kg & formalin test with significant inhibition in the first phase at 400 mg/kg, p.o. in Swiss mice.                                                                                                                                                                                                            | Ethanol extract 95%.                                                         | Anjos et al., 2017.                                                                                                                                            |
| <i>Hissopus cuspidatus</i> Boriss.     | Aerial parts           | Attenuation of the LPS-induced inflammatory responses by inhibition of iNOS and COX-2 expression through suppression of NF- $\kappa$ B activation. JAX2 significantly inhibits airway remodeling in asthma, inhibiting the proliferation and migration of hASMCs, releasing inflammatory factors and metalloproteinases, activating the ERK1/2 signal pathway, & promoting the secretion of anti-inflammatory factors. | Ethanol extract                                                              | Qin et al., 2023; Aihaiti et al., 2023; Cai et al., 2023; Ling-Fei, K. et al, 2023; Liu et al., 2021; Liu et al., 2021b: Yuan et al., 2019; Zhao et al., 2013. |

| Species                                          | Plant part(s) | Pharmacology activity                                                                                                                                                                                                                                                                                                                                                                                                                                                                                                                                                                                                                                                                                                                                                                                                                                               | Extract(s)                                                       | Reference                                                     |
|--------------------------------------------------|---------------|---------------------------------------------------------------------------------------------------------------------------------------------------------------------------------------------------------------------------------------------------------------------------------------------------------------------------------------------------------------------------------------------------------------------------------------------------------------------------------------------------------------------------------------------------------------------------------------------------------------------------------------------------------------------------------------------------------------------------------------------------------------------------------------------------------------------------------------------------------------------|------------------------------------------------------------------|---------------------------------------------------------------|
| <i>Hyssopus officinalis</i> L.                   | Aerial parts  | Anti- inflammatory effect of the extract at 200 mg/kg, p.o. in the edema induced by carrageenan in Wistar rats. Inflammation reduced at 5 mg/kg by modulation of the IL-1B & IL-10 in the carrageenan-induced edema. Immune and inflammatory regulation of the airways in BALB/c mouse model of chronic asthma. A decrease in levels of eosinophils & IgE in bronchial alveolar fluid at 0.04 g/10 g, p.o.                                                                                                                                                                                                                                                                                                                                                                                                                                                          | Aqueous extract, aqueous-nanoparticles of ZnO, methanol extract. | Ma et al., 2014; Mohammad et al., 2019; Micovic et al., 2022. |
| <i>Isodon adenanthus</i> (Diels) Kudô            | Leaves        | Adenanthine prevents encephalomyelitis by inhibiting NF-κB signaling in C57BL/6 mice.                                                                                                                                                                                                                                                                                                                                                                                                                                                                                                                                                                                                                                                                                                                                                                               | Adenanthine                                                      | Yin et al., 2013.                                             |
| <i>Isodon amethystoides</i> (Benth.) H. Hara     | Whole plant   | Glaucocalyxin A inhibited LPS-induced production of NO and reversed the morphological changes in primary microglia. It suppressed expression of iNOS & COX-2 dose-dependently at the mRNA and protein levels. The production of proinflammatory cytokines such as TNF-a, IL-1b & IL-6 was inhibited by suppressing their transcriptional activity.                                                                                                                                                                                                                                                                                                                                                                                                                                                                                                                  | Methanol extract                                                 | Xiang et al. 2014.                                            |
| <i>Isodon coetsa</i> (Buch.-Ham. ex D. Don) Kudô | Leaves        | Clastogenic activity with increasing concentrations and time durations. The major abnormalities included chromosome fragments, stickiness, ring chromosomes, chromosome bridges, pulverization, binucleate cell, micronucleus, ball metaphase, chromosome laggards, and shift in microtubule organizing center. Possible toxic activity of the extract suggests judicious use.                                                                                                                                                                                                                                                                                                                                                                                                                                                                                      | Aqueous extract                                                  | Neelamkavil & Thoppil, 2013; 2014.                            |
| <i>Isodon excisus</i> (Maxim.) Kudô              | Leaves        | Inflexinol (1, 5, 10 μM) suppressed the expression of iNOS & COX-2, as well as the production of NO in LPS-stimulated RAW 264.7 cells and astrocytes. Consistent with the inhibitory effect on iNOS and COX-2 expression, inflexinol also inhibited transcriptional and DNA binding activity of NF-κB via inhibition of IκB degradation as well as p50 and p65 translocation into nucleus.<br>Inflexin exhibits antiinflammatory effects suppressing NO release in primary culture of rat microglia cells and BV-2 microglial cells. Inflexin also significantly inhibited the release of proinflammatory mediators and the release of iNOS, COX-2, IL-1β, IL-6 and TNF-α in LPS-stimulated BV-2 microglial cells. The anti-inflammatory properties of inflexin are mediated by down-regulation of NF-κB and Akt but not MAPKs activation in BV-2 microglial cells. | Methanol extract                                                 | Lee et al., 2007; Ko et al., 2010.                            |

| Species                                            | Plant part(s) | Pharmacology activity                                                                                                                                                                                                                                                                                                                                                                                                                                                                                                                                                                                                                                                                                                                                                                                                                                                                                                                                                                                                                                                                                                                                                                                                                                                                                      | Extract(s)                          | Reference                                                                                                                                     |
|----------------------------------------------------|---------------|------------------------------------------------------------------------------------------------------------------------------------------------------------------------------------------------------------------------------------------------------------------------------------------------------------------------------------------------------------------------------------------------------------------------------------------------------------------------------------------------------------------------------------------------------------------------------------------------------------------------------------------------------------------------------------------------------------------------------------------------------------------------------------------------------------------------------------------------------------------------------------------------------------------------------------------------------------------------------------------------------------------------------------------------------------------------------------------------------------------------------------------------------------------------------------------------------------------------------------------------------------------------------------------------------------|-------------------------------------|-----------------------------------------------------------------------------------------------------------------------------------------------|
| <i>Isodon henryi</i> (Hemsl.) Kudô                 | Whole plant   | Rabdoternin A, lasiodonin : Inhibición de NO en macrófagos RAW 264.7 inducidos con LPS (IC <sub>50</sub> = 6.70, 5.85 µM, respectivamente)                                                                                                                                                                                                                                                                                                                                                                                                                                                                                                                                                                                                                                                                                                                                                                                                                                                                                                                                                                                                                                                                                                                                                                 | Ethanol extract 70%.                | Cheng et al., 2022.                                                                                                                           |
| <i>Isodon japonicus</i> (Burm. f.) H. Hara         | Aerial parts  | Inhibitory effects on LPS-induced NO & PGE <sub>2</sub> production in RAW264.7 cells. Kamebanin (IC <sub>50</sub> = 0.06 µM), kamebacetal A (IC <sub>50</sub> = 0.58 µM), kamebakaurin (IC <sub>50</sub> = 0.15 µM), excisanin A (IC <sub>50</sub> = 0.35 µM).<br>Oridonin strongly suppressed particulate-induced cell death accompanied by the release of IL-1α & IL-1β in mouse and human macrophages. The extract attenuated expression of NO, iNOS & TNF-α in BV2 microglial cell LPS-stimulated. The extract inhibited compound 48/80-induced systemic reactions and plasma histamine release in mice. Decreased the PCA reaction activated by antidinitrophenyl (DNP) IgE antibody. Kamebakaurin inhibited the LPS-induced production of NO in activated microglial cells. The mRNA and protein levels of inducible iNOS and COX-2 were also decreased. Effusanin C inhibited the production of inflammatory mediators NO, IL-1β, and TNF-α in macrophages and dendritic cells.<br>Pretreatment with isodojaponin D (5 and 10 µg/ml) prior to treatment with LPS significantly decreased LPS-induced production of COX-2 and iNOS in a dose-dependent manner. In addition, LPS-induced pro-inflammatory cytokines (IL-1β, IL-6, and TNF-α) were also decreased by pretreatment with isodojaponin D. | Methanol extract & Aqueous extract. | Hwang et al. 2001; Shin et al., 2004; Hong et al., 2009; Lim et al. 2010; Kim et al., 2011; Kim et al., 2013; Kang, 2018; Ikoma et al., 2022. |
| <i>Isodon melissoides</i> (Benth.) H.W. Li         | Aerial parts  | Overproduction of pro-inflammatory cytokines was significantly decreased in the essential oil treated cells in LPS-induced inflammation in HaCaT cells in a dose-dependent manner without any cytotoxic effect.<br>Melissoidesin inhibited the growth of human leukemia cell lines and primary acute myeloid leukemia (AML) blasts via induction of apoptosis, with the evidence of mitochondrial DWm loss, ROS production, caspases activation, & nuclear fragmentation.                                                                                                                                                                                                                                                                                                                                                                                                                                                                                                                                                                                                                                                                                                                                                                                                                                  | Essential oil                       | Yu et al., 2007; Kumar et al., 2021.                                                                                                          |
| <i>Isodon scoparius</i> C.Y. Wu & H.W. Li) H. Hara | Aerial parts  | Scopariusol L inhibited NO in RAW 264.7 macrophages induced with LPS (IC <sub>50</sub> = 0.6 µM*L <sup>-1</sup> )                                                                                                                                                                                                                                                                                                                                                                                                                                                                                                                                                                                                                                                                                                                                                                                                                                                                                                                                                                                                                                                                                                                                                                                          | Acetone extract 70%.                | Jiang et al., 2018.                                                                                                                           |
| <i>Isodon serra</i> (Maxim.) Kudô                  | Aerial parts  | Oridonin (12 µg/mL) inhibited BAFF expression in mouse macrophages, and <i>in vivo</i> administration (9 mg/kg) ameliorated the serological and clinical manifestations of systemic lupus erythematosus in MRLlpr/lpr mice. Serrin F, 14b-hydroxyrabdocoestin A,                                                                                                                                                                                                                                                                                                                                                                                                                                                                                                                                                                                                                                                                                                                                                                                                                                                                                                                                                                                                                                           | Non described                       | Zhang et al., 2005; Li et al., 2010; Zhou et al. 2013; Wan et al., 2016; Xing et al., 2020.                                                   |



| Species                                             | Plant part(s) | Pharmacology activity                                                                                                                                                                                                                                                                                                                                                                                                                                                                                                                                                                      | Extract(s)                                                               | Reference                                                               |
|-----------------------------------------------------|---------------|--------------------------------------------------------------------------------------------------------------------------------------------------------------------------------------------------------------------------------------------------------------------------------------------------------------------------------------------------------------------------------------------------------------------------------------------------------------------------------------------------------------------------------------------------------------------------------------------|--------------------------------------------------------------------------|-------------------------------------------------------------------------|
|                                                     |               | serrin H, serrin I, enanderianin N, & megathyrin B strongly inhibited NO production in LPS-stimulated RAW264.7 cells.<br>Enmein produced potential immunosuppressive action in <i>in vitro</i> and <i>in vivo</i> models. Isoserrin A, B, C, D, E, F, G, H & I exhibited notable NO production inhibition in LPS-stimulated BV-2 cells (IC <sub>50</sub> = 15.6-7.3 µM). Nodosin depressed the murine ear-swelling extent and the IL-2 levels in the blood serum.                                                                                                                          |                                                                          |                                                                         |
| <i>Isodon sculponeatus</i> (Vaniot) Kudô            | Aerial parts  | Sculponeatin J produced cytotoxic activity against five human tumor cell lines with IC <sub>50</sub> values ranging from 1.8 mmol/L to 3.3 mmol/L, and it also inhibited NO production in LPS-stimulated RAW264.7 cells, with IC <sub>50</sub> value of 3.3 mmol/L. Sculponin T & sculponeatin C showed moderate cytotoxicity in the same tumor cell lines. Sculponins Y exhibited weak cytotoxic activity against HL-60, SMMC-7721, MCF-7, & SW-480 cell lines. It also inhibited NO production in LPS-stimulated RAW264.7 cells with IC <sub>50</sub> value of 13.8 µM.                  | 70% aqueous acetone, and then partitioned between ethyl acetate & water. | Jiang et al., 2014a; 2014b.                                             |
| <i>Isodon ternifolius</i> (D.Don) Kudô              | Root          | Ternifoliuslignane A-D & 3-carboxy-6,7-dihydroxy-1-(3',4'-dihydroxyphenyl)-naphthalene produced NO inhibition in LPS-induced RAW 264.7 macrophages (IC <sub>50</sub> = 9.98–29.14 µM).                                                                                                                                                                                                                                                                                                                                                                                                     | Methanol extract                                                         | Zhang et al., 2018.                                                     |
| <i>Isodon rubescens</i> (Hemsl.) H. Hara            | Aerial parts  | Isojiangrubesina B, isojiangrubesina E, effusanin A, longikaurin A, & 7,14-O-(1-metiletilidene) oridonin produced inhibition of NO in RAW 264.7 macrophages induced with LPS (IC <sub>50</sub> = 1.2, 1.3, 1.3, 0.8, 1.1 µM, respectively). Orodinin was covalent and specific inhibitor for the NLRP3 inflammasome in mouse models of peritonitis, gouty arthritis, & type 2 diabetes. It significantly suppressed the production of MMP1, MMP3 and MMP13. It attenuated NO and PGE2 production, as well as iNOS and COX-2 expression in IL-1β-induced human osteoarthritis chondrocytes. | Ethanol extract 80%, acetone extract 70%.                                | Du et al., 2013; Zhang et al., 2017; He et al., 2018; Jia et al., 2019. |
| <i>Isodon wikstroemioides</i> (Hand.-Mazz.) H. Hara | Aerial parts  | Isowikstroemins A–D were evaluated for their cytotoxicity against five human tumor cell lines & exhibited significant activity with IC <sub>50</sub> values ranging from 0.9 to 7.0 µM. Isowikstroemins A–D and G exhibited inhibitory activity against NO production in LPS-activated RAW264.7 macrophages. Isowikstroemins H, J, & macrocalyxin B were evaluated for their cytotoxicity against human tumor cell lines (HL-60, SMMC-7721, A-549, MCF-7, SW-480), and exhibited significant cytotoxicity with IC <sub>50</sub> values ranging from (0.84 ± 0.02) to (4.09 ± 0.34) µmol/L. | 70% aqueous acetone partitioned between ethyl acetate and water.         | Wu et al., 2014; 2015.                                                  |

| Species                                     | Plant part(s)    | Pharmacology activity                                                                                                                                                                                                                                                                                                                                                                                                                                                                                                                                                                                                                                                                                                                                                                                                                                                                                                                                                                                                                                                                                                                                                                                                                                                                                                                                                                                                                                                                                                             | Extract(s)                                                                                         | Reference                                                                                                                                                                                                                                     |
|---------------------------------------------|------------------|-----------------------------------------------------------------------------------------------------------------------------------------------------------------------------------------------------------------------------------------------------------------------------------------------------------------------------------------------------------------------------------------------------------------------------------------------------------------------------------------------------------------------------------------------------------------------------------------------------------------------------------------------------------------------------------------------------------------------------------------------------------------------------------------------------------------------------------------------------------------------------------------------------------------------------------------------------------------------------------------------------------------------------------------------------------------------------------------------------------------------------------------------------------------------------------------------------------------------------------------------------------------------------------------------------------------------------------------------------------------------------------------------------------------------------------------------------------------------------------------------------------------------------------|----------------------------------------------------------------------------------------------------|-----------------------------------------------------------------------------------------------------------------------------------------------------------------------------------------------------------------------------------------------|
|                                             |                  | Isowikstroemins H, J, K, & macrocalyxin B exhibited inhibitory activity against NO production in LPS-activated RAW264.7 macrophages.                                                                                                                                                                                                                                                                                                                                                                                                                                                                                                                                                                                                                                                                                                                                                                                                                                                                                                                                                                                                                                                                                                                                                                                                                                                                                                                                                                                              |                                                                                                    |                                                                                                                                                                                                                                               |
| <i>Lallemantia royleana</i> (Benth.) Benth. | No identified    | Anti-inflammatory activity in rheumatoid arthritis. The natural mucilage, used in the gel, possesses anti-inflammatory properties. suggesting exerting a synergistic action of niosomal gel system at the target site to improve overall effect                                                                                                                                                                                                                                                                                                                                                                                                                                                                                                                                                                                                                                                                                                                                                                                                                                                                                                                                                                                                                                                                                                                                                                                                                                                                                   | Mucilage                                                                                           | Bhardwaj et al., 2020; Bhardwaj & Bhatia, 2020.                                                                                                                                                                                               |
| <i>Lavandula angustifolia</i> Mill.         | Leaves & flowers | Anti-inflammatory effect of the EE with 96% inhibition at 1600 mg/kg, p.o. in the second phase of the formalin test in mouse . FP produced 70% inhibition at 1600 mg/kg, p.o., whereas AE produced 90% inhibition at 200 mg/kg, p.o. Antiaging effect by decreasing MDA levels and increased SOD and GSH-Px at 17.4, 34.8 and 69.6 mg/kg. Downregulation of genes encoding IL-6 & IL-1A in human macrophages infected with <i>S. aureus</i> . Effect on ROS production in WBP and human neutrophils. Anti-inflammatory effect in the edema induced with croton oil (0.25-1 mg/ear, by decreasing NO and MPO in Swiss mouse. In the edema induced by carrageenan at 75-250 mg/kg, p.o. & in the dextran-induced edema (75-100 mg/kg, p.o. decreases MPO activity). Reduction of TNF- $\alpha$ , IL-1 $\beta$ , IL-10 at 100-300 mg/kg, i.p. in a rat model of ischemia. Anti-inflammatory effect in the. edema induced with TPA (58.66% inhibition at 100 mg/kg) by decreasing levels of TNF- $\alpha$ , NF- $\kappa$ B, & COX-2. Reduction of mechanical hyperalgesia in chronic inflammatory and neuropathic pain conditions in mouse models. Reduction of proinflammatory cytokines (IL-8, IL-1 $\beta$ and NF- $\kappa$ B) in human THP-1 macrophages induced with LPS. Anti-inflammatory effect in sepsis model in Sprague-Dawley rats by reducing TNF- $\alpha$ (BALF: 64%, serum: 59%; IL-1 $\beta$ (BALF: 63%, serum: 66%)); IL-6 (BALF: 54 %, serum: 59%), as well as 56-76% reduction in induced edema in murine models. | Ethanol extract (EE), polyphenolic fraction (PF), essential oil (AE), aqueous-ethanol extract 75%. | Hajhashemi et al., 2003; Zhao et al., 2015; Giovannini et al., 2016; Georgiev et al., 2017; Cardia et al., 2018; Sourì et al., 2019; Chen et al., 2020; Donatello et al., 2020; Slighoua et al., 2022; Pandur et al., 2021; Xie et al., 2022. |
| <i>Lavandula bipinnata</i> (L.) O. Ktze.    | Aerial parts     | 50% inhibition of COX-2 in human cell lines.                                                                                                                                                                                                                                                                                                                                                                                                                                                                                                                                                                                                                                                                                                                                                                                                                                                                                                                                                                                                                                                                                                                                                                                                                                                                                                                                                                                                                                                                                      | Ethanol extract                                                                                    | Shaikh et al., 2014.                                                                                                                                                                                                                          |
| <i>Lavandula coronopifolia</i> Poir.        | Aerial parts     | Significant inhibition (p<0.05) and powerful inhibition in COX-2 (100% at 50, 100, & 200 $\mu$ g/mL )                                                                                                                                                                                                                                                                                                                                                                                                                                                                                                                                                                                                                                                                                                                                                                                                                                                                                                                                                                                                                                                                                                                                                                                                                                                                                                                                                                                                                             | Essential oil                                                                                      | Abeer et al., 2020; Nassef et al., 2022.                                                                                                                                                                                                      |
| <i>Lavandula dentata</i> L.                 | Aerial parts     | Griess assay and ELISA to analyze different inflammatory markers.                                                                                                                                                                                                                                                                                                                                                                                                                                                                                                                                                                                                                                                                                                                                                                                                                                                                                                                                                                                                                                                                                                                                                                                                                                                                                                                                                                                                                                                                 | Methanolic extract                                                                                 | Algieri et al., 2016; Contreras et al., 2018; Abdelhakim et al., 2023.                                                                                                                                                                        |

| Species                                  | Plant part(s)           | Pharmacology activity                                                                                                                                                                                                                                                                                                                                  | Extract(s)                              | Reference                                                                                                         |
|------------------------------------------|-------------------------|--------------------------------------------------------------------------------------------------------------------------------------------------------------------------------------------------------------------------------------------------------------------------------------------------------------------------------------------------------|-----------------------------------------|-------------------------------------------------------------------------------------------------------------------|
| <i>Lavandula latifolia</i> Medik.        | Aerial parts            | Anti-inflammatory effects in the carrageenin-induced edema test.                                                                                                                                                                                                                                                                                       | Essential oils from commercial sources. | Shimizu et al., 1990; Carrasco et al., 2015; Vairinhos and Miguel, 2020; Lucca et al., 2022; Karaka et al., 2023. |
| <i>Lavandula multifida</i> L.            | Aerial parts            | A dose-dependent anti-inflammatory effect, where the ethanol extract was the most active. Aqueous extract exerted a significant activity only at 300 and 1000 mg cm <sup>2</sup> (24% and 33% edema reduction, respectively).                                                                                                                          | Aqueous & ethanol extracts.             | Sosa et al., 2005.                                                                                                |
| <i>Lavandula pubescens</i> Decne.        | Aerial parts            | It exhibited strong antioxidant (IC <sub>50</sub> 0.16–0.18 µL/mL), antiacetylcholinesterase (IC <sub>50</sub> 0.9 µL/mL), antibutyrylcholinesterase (IC <sub>50</sub> 6.82 µL/mL), & antilipase (IC <sub>50</sub> 1.08 µL/mL) effects.                                                                                                                | Essential oil (EO)                      | Ali-Shtayeh et al., 2020; Ahmad et al., 2022; Acero et al., 2022.                                                 |
| <i>Lavandula stoechas</i> L.             | Aerial parts & flowers. | Anti-inflammatory activity in the edema induced with carrageenan (38% inhibition at 200 mg/kg p.o.). Anti-inflammatory effect on LPS-stimulated macrophages. EE= 74±7 % inhibition at 5-10% b.w. & FP= 85.1 ± 6.2 inhibition at 5-10% b.w. Inhibition of iNOS/NO signaling and gene expression for IL-1β and COX-2 in LPS-induced RAW264.7macrophages. | Methanol extract, essential oil.        | Amira et al., 2012; Zuzarte et al., 2013; Zoubi et al., 2016; Kulabas et al., 2018.                               |
| <i>Lavandula viridis</i> L'Her.          | Aerial parts            | A potent effect on ROS inhibition, as well as a strong anti-inflammatory potential due to the modulation of the proinflammatory signaling cascade NF-κB                                                                                                                                                                                                | Essential oil                           | Skala et al., 2020; Zuzarte et al., 2022.                                                                         |
| <i>Lavandula x intermedia</i>            | Aerial parts            | A dose-dependent anti-inflammatory activity with strong inhibition of NO production even at low concentration (0.03% v/v).                                                                                                                                                                                                                             | Essential oil                           | Carbone et al., 2018; Karakas & Matpan 2022.                                                                      |
| <i>Lepechinia meyenii</i> (Walp.) Epling | Leaves                  | Flavonoids showed the best immunomodulating effect. This fraction diminished the superoxide anion production in a concentration dependent manner. A diminution in the expression of TNFα, IL8, & IL17 in mononuclear leukocytes.                                                                                                                       | Methanol extract 70%.                   | Arenas-Chávez et al., 2018.                                                                                       |
| <i>Lycopus lucidus</i> Turcz. ex Benth.  | Aerial parts & leaves   | The extract decreased the local allergic reaction, passive cutaneous anaphylaxis, histamine release, secretion of TNF-α and IL-6 in mice ICR model. <i>In vitro</i> models gathered suggest that the extract could suppress high glucose-induced vascular inflammatory processes.                                                                      | Aqueous extract                         | Shin et al., 2005; Lee et al., 2008; Kim et al., 2021; Min et al., 2021.                                          |

| Species                                       | Plant part(s)              | Pharmacology activity                                                                                                                                                                                                                                                                                                                                                                                                                                                                                                                                                            | Extract(s)                                           | Reference                                                                                                                              |
|-----------------------------------------------|----------------------------|----------------------------------------------------------------------------------------------------------------------------------------------------------------------------------------------------------------------------------------------------------------------------------------------------------------------------------------------------------------------------------------------------------------------------------------------------------------------------------------------------------------------------------------------------------------------------------|------------------------------------------------------|----------------------------------------------------------------------------------------------------------------------------------------|
|                                               |                            | Protection in cultured rat cortical neurons from H <sub>2</sub> O <sub>2</sub> -induced neuronal injury by significantly inhibiting NLRP3 inflammasome activation (10, 25, and 50 µg/mL). Reduced levels of pro-inflammatory cytokines in a mice model of atopic dermatitis.                                                                                                                                                                                                                                                                                                     |                                                      |                                                                                                                                        |
| <i>Marsypianthes chamaedrys</i> (Vahl) Kuntze | Aerial parts & leaves      | Phospholipase A <sub>2</sub> inhibition at 35 to 70 mg/mL. Anti-inflammatory activity at 2 g/kg) by inhibition of <i>Evans Blue</i> diffusion into peritoneal cavities. Inhibition of migration of inflammatory cells.                                                                                                                                                                                                                                                                                                                                                           | Aqueous extract                                      | Ruppelt et al., 1991; Magalhães et al., 2011                                                                                           |
| <i>Melissa officinalis</i> L.                 | Leaves                     | Antinociceptive effects in the writhing test (IC <sub>50</sub> = 241.9 mg/kg, p.o.) & formalin test (inhibition of 33.75 in the 1 <sup>st</sup> phase and 48% 2 <sup>nd</sup> phase at 100 mg/kg) in Swiss mice. Anti-inflammatory effects in the carrageenan-induced pleurisy (60% inhibition of leukocytes and 52% of polymorphonuclear cells 56%) at 200 mg/kg, p.o. in Wistar rats. Anti-inflammatory effects (61.67% inhibition) at 200 mg/kg p.o. EE 63.89% inhibition at 200 mg/kg, p.o. & AC 76.67% inhibition at 100 mg/kg, p.o. in the carrageenan-induced edema test. | Ethanol (EE) & aqueous extracts (AE), essential oil. | Guginski et al., 2009; Müzell et al., 2013; Bohunihi et al., 2013; Zam et al., 2002; Draginic et al., 2022.                            |
| <i>Mentha aquatica</i> L.                     | Aerial parts               | Chemopreventive effects against vemurafenib-induced cutaneous side-effects in a carcinogenesis mouse model.                                                                                                                                                                                                                                                                                                                                                                                                                                                                      | Essential oil                                        | Chang et al., 2019.                                                                                                                    |
| <i>Mentha arvensis</i> L.                     | Whole plant & aerial parts | Inhibition of NO, PGE <sub>2</sub> , IL-1β, IL-6 in RAW 264.7 macrophages & HaCaT cells induced with LPS. Attenuation of atopic dermatitis in a mouse model. Anti-inflammatory effect in murine induced edema model: leaf= 68.30% inhibition, root= 48.80% inhibition, & stem=10.70% inhibition.                                                                                                                                                                                                                                                                                 | Essential oil & ethanol extract.                     | Feng et al., 2015; Thawkar et al., 2016; Demirci et al., 2021; Kim et al., 2021b.                                                      |
| <i>Mentha cordifolia</i> Opiz ex Fresen.      | Leaves                     | Menthol: Inhibition of lymphocyte proliferation (88.7% at 50 µg/mL) & IFN-γ inhibition (80% at 800 µg/mL) in PBMCs.                                                                                                                                                                                                                                                                                                                                                                                                                                                              | Ethanol extract                                      | Bayat et al., 2019; Villaseñor et al., 2002.                                                                                           |
| <i>Mentha longifolia</i> (L.) Huds.           | Whole plant                | Reduces IL-1β, IL-6, TNF-α in mouse models of Alzheimer's. Decreased NO, mRNA for iNOS, & TNF-α in J774.1A macrophages at 0.20 mg/mL. Decreased MPO, PGE <sub>2</sub> , AST, ALT, & increased GSH and FRAP in a murine model of liver injury. Longifolin A significantly decreased NO levels in RAW 264.7 macrophages. Eucalyptol at 400 mg/kg, p.o. reduced MPO, MDA, TNF-α, & IL-6 levels with an increase in GSH in plasma of rats with acetic acid-induced colitis.                                                                                                          | Ethanol extract 70%, hexane extract & essential oil. | Karimian et al., 2013; Ibrahim et al., 2016; Murad et al., 2016; Dadkhah et al. 2018; Moshrefi-Araghi et al., 2021; Wang et al., 2022. |

| Species                                                | Plant part(s)                  | Pharmacology activity                                                                                                                                                                                                                                                                                                                                                              | Extract(s)                                                       | Reference                                                                                                       |
|--------------------------------------------------------|--------------------------------|------------------------------------------------------------------------------------------------------------------------------------------------------------------------------------------------------------------------------------------------------------------------------------------------------------------------------------------------------------------------------------|------------------------------------------------------------------|-----------------------------------------------------------------------------------------------------------------|
| <i>Menta piperita</i> L.                               | Leaves & aerial parts          | Decreased levels of PLA2, IgE, IL-4, & total protein using 5 µg/mL in Wistar rats pretreated with ovalbumin. Anti-inflammatory effect (40-120 mg/kg, p.o.). Inhibition of TNF- $\alpha$ , IL-6, NO, & PGE2 in RAW 264.7 macrophages induced with LPS.                                                                                                                              | Aqueous extract-Au-Nps, ethanol extract, & essential oil.        | Abdolmaleki et al., 2013; Sun et al., 2014; Li et al., 2017; Yi et al., 2022.                                   |
| <i>Mentha pulegium</i> L.                              | Aerial parts & leaves          | Protein denaturation, inhibition IC <sub>50</sub> = 88.31 $\pm$ 1.37% v/v. Anti-inflammatory effects in the carrageenan-induced edema (28% reduction at 300 µg/cm <sup>2</sup> ). Decreased IL-6, MCP-1, & TNF- $\alpha$ in RAW 264.7 macrophages induced with LPS. Anti-inflammatory effect (22.16% inhibition at 12.5 mg/kg, p.o.). in the edema induced by carrageenan in mice. | Essential oil, ethanol & aqueous extracts.                       | Moussaid et al., 2011; Brahmi et al., 2018; Luis & Domingues, 2021; Messaoudi et al., 2022; Rocha et al., 2019. |
| <i>Mentha spicata</i> L.                               | Whole plant & leaves           | Decreased jejunal tissue and attenuation of IL-1 $\beta$ and $\beta$ -glucuronidase in feces. Greater inhibition with the administration of ethyl acetate extract than methanol in granuloma induced in murine models. Where irinotecan-induced mucositis in murine models.                                                                                                        | Hexane, ethyl acetate, methanol, chloroform, & aqueous extracts. | el Menyiy et al., 2022.                                                                                         |
| <i>Mentha suaveolens</i> Ehrh.                         | No identified                  | Anti-inflammatory activity in the carrageenan-induced rat paw oedema test (51% of inhibition at 100 mg/kg as compared to the control).                                                                                                                                                                                                                                             | Essential oil & methanol extract.                                | Moreno et al., 2002; El-Kashoury et al. 2012; Mogosan et al., 2017; Lee et al., 2021.                           |
| <i>Mentha x villosa</i>                                | Leaves                         | Essential oil and piperitone oxide possess antinociceptive activity probably by an indirect anti-inflammatory effect, which does not involve the central nervous system.                                                                                                                                                                                                           | Essential oil                                                    | Souza et al., 2009.                                                                                             |
| <i>Micromeria biflora</i> (Buch. Ham. ex D.Don) Benth. | Aerial parts                   | Antinociceptive & anti-inflammatory effects in BALB/c mice. Thermal stimulation (delay in reaction time at 2.5-20 mg/kg, p.o.) & edema induced with carrageenan (80.98% inhibition at 15 mg/kg, p.o.).                                                                                                                                                                             | Chloroform extract & Salicilalazina                              | Alhojani et al., 2022.                                                                                          |
| <i>Micromeria croatica</i> (Pers.)                     | Aerial parts                   | Reduces expression of TGF- $\beta$ 1 & $\alpha$ -SMA at 400 mg/kg, p.o. in murine models of liver injury.                                                                                                                                                                                                                                                                          | Ethanol extract 70%.                                             | Vladimir-Knežević et al., 2015.                                                                                 |
| <i>Minthostachys verticillata</i> (Griseb.) Epling     | Aerial parts, leaves, & steams | Significant reduction in the colon weight/length ratio, oxidative stress, & expression levels of IL-1 $\beta$ , iNOS, & COX-2 at 250-500 mg/kg in colitis rat model. Inhibition of $\beta$ -h release in basophils and lymphocytes from allergic patients. Modulator of the innate immune                                                                                          | Aqueous extract &                                                | Gonzalez-Pereira et al., 2005; Cariddi et al., 2006; Montironi et al., 2019;                                    |

| Species                                      | Plant part(s) | Pharmacology activity                                                                                                                                                                                                                                                                                                                                                                                                                                                                                                                                                                                                                                                                                                                                                                                                             | Extract(s)                            | Reference                                                            |
|----------------------------------------------|---------------|-----------------------------------------------------------------------------------------------------------------------------------------------------------------------------------------------------------------------------------------------------------------------------------------------------------------------------------------------------------------------------------------------------------------------------------------------------------------------------------------------------------------------------------------------------------------------------------------------------------------------------------------------------------------------------------------------------------------------------------------------------------------------------------------------------------------------------------|---------------------------------------|----------------------------------------------------------------------|
|                                              |               | response in mammary glands of female Balb/c mice challenged with <i>E. faecium</i> decreasing the infiltration of polymorphonuclear neutrophils and IL-1 $\beta$ & TNF- $\alpha$ mRNA expression. EO increased the expression of IL-10 in the last hours of infection. Anti-inflammatory activity and potential for managing bovine mastitis.                                                                                                                                                                                                                                                                                                                                                                                                                                                                                     | essential oil (EO).                   | Rodriguez-Basso et al., 2021; Sharun et al., 2021.                   |
| <i>Monarda didyma</i> L.                     | Aerial parts  | Essential oil decreased expression of pro-inflammatory cytokine IL-6 and the increased expression of miR-146a suggesting the involvement of the Toll-like receptor-4 signaling pathway. Where possible bioactive compounds are mainly aromatic monoterpenes & phenolic monoterpenes.                                                                                                                                                                                                                                                                                                                                                                                                                                                                                                                                              | Essential oil                         | Cotê et al., 2021; Fraternale et al., 2022.                          |
| <i>Monarda fistulosa</i> L.                  | No identified | Anti-inflammatory activity at 100 and 200 mg/kg dosage in the carrageenan-induced rat paw oedema test.                                                                                                                                                                                                                                                                                                                                                                                                                                                                                                                                                                                                                                                                                                                            | Hydroalcoholic extract                | Murata et al., 2013; Shanaida et al., 2021a; Shanaida et al., 2021b. |
| <i>Mosla chinensis</i> Maxim.                | Stem & leaf   | In the recipe “Shenshusan”, one of its components is <i>M. chinensis</i> that showed significant anti-inflammatory activity at 340 mg/kg in mice. <i>M. chinensis</i> extract ameliorated inflammation by a 'significant reduction in the production of ROS, increasing the activity of antioxidative enzymes, suppressed the secretion of inflammatory mediators (NO, PGE2), & cytokines (TNF- $\alpha$ , IL-6, IL-1 $\beta$ ). The extract also restrained the activation of mitogen-activated protein kinases (MAPKs) signaling pathway.                                                                                                                                                                                                                                                                                       | Essential oil & methanol extract 80%. | Wang et al., 2021; Zhong et al., 2022.                               |
| <i>Mosla scabra</i> (Thunb.) C.Y.Wu & H.W.Li | Aerial parts  | Anti-inflammatory effects (10, 30 and 90 mg/kg, p.o.) by inhibition of proinflammatory cytokines through the inhibition of MAPK & NF- $\kappa$ B in LPS and ALI (acute lung injury) in mice.                                                                                                                                                                                                                                                                                                                                                                                                                                                                                                                                                                                                                                      | Flavonoid fraction                    | Chen et al., 2013.                                                   |
| <i>Nepeta bracteata</i> Benth.               | Aerial parts  | Abietane-type diterpenoids, norabietane-type & ursane-type triterpenoids produced anti-inflammatory effects on the LPS-stimulated RAW 264.7 cells. All compounds significantly down-regulated the TNF- $\alpha$ inflammatory factor, except for nepetabrate J. Amide alkaloid & diterpenoids were elucidated by HR-ESI-MS, NMR, and CD analyses. The anti-inflammatory activity of all compounds was explored using LPS-stimulated RAW 264.7 cells. It is worth noting that all were able to inhibit NO production with IC <sub>50</sub> values < 50 $\mu$ M and little effect on RAW 264.7 macrophage viability. Remarkable inhibition with IC <sub>50</sub> values of 19.2 & 18.8 $\mu$ M, respectively. Meanwhile, screening on HCT-8 cells demonstrated that nepetabrates B and D also had moderate cytotoxic activities with | Ethanol extract 95%.                  | Zhang et al., 2021; Yang et al., 2022.                               |

| Species                                      | Plant part(s) | Pharmacology activity                                                                                                                                                                                                                                                                                                                                                                                                                                                                                                                                                                                                                                                                                                                                                                                                                                                                                                                                                                                     | Extract(s)                                                               | Reference                                                                                  |
|----------------------------------------------|---------------|-----------------------------------------------------------------------------------------------------------------------------------------------------------------------------------------------------------------------------------------------------------------------------------------------------------------------------------------------------------------------------------------------------------------------------------------------------------------------------------------------------------------------------------------------------------------------------------------------------------------------------------------------------------------------------------------------------------------------------------------------------------------------------------------------------------------------------------------------------------------------------------------------------------------------------------------------------------------------------------------------------------|--------------------------------------------------------------------------|--------------------------------------------------------------------------------------------|
|                                              |               | IC <sub>50</sub> values of 36.3 & 41.4 µM, respectively, which is related to their anti-inflammatory effects.                                                                                                                                                                                                                                                                                                                                                                                                                                                                                                                                                                                                                                                                                                                                                                                                                                                                                             |                                                                          |                                                                                            |
| <i>Nepeta cataria</i> Benth.                 | Aerial parts  | Verbascoside produced inhibition of calcineurin activity in an <i>in vitro</i> assay with a IC <sub>50</sub> = 4.5 µM. Ant-inflammatory effects were explored in tail immersion test and acetic acid-induced nociception in mice.                                                                                                                                                                                                                                                                                                                                                                                                                                                                                                                                                                                                                                                                                                                                                                         | Essential oil                                                            | Modnicki et al. 2007; Prescott et al., 2011; Pargaian et al., 2020; Acimovic et al., 2022. |
| <i>Nepeta crispa</i> Willd.                  | Aerial parts  | Antinociceptive effects explored in the tail-flick test (54.7% inhibition at 200 mg/kg, i.p.), formalin test (30-200 mg/kg significantly reduced nociceptive behavior in the neurogenic and inflammatory phases).                                                                                                                                                                                                                                                                                                                                                                                                                                                                                                                                                                                                                                                                                                                                                                                         | Essential oil                                                            | Ali et al., 2012.                                                                          |
| <i>Nepeta deflersiana</i> Schweinf. ex Hedge | Aerial parts  | Ethyl acetate & n-butanol extracts showed a decrease in oxidative stress and inhibition of both NF-κB and iNOS activities with no cytotoxic effects on four human cancer cell lines (SK-OV-3, SK-MEL, KB, and BT-549). In contrast, there is moderate cytotoxic action against one of the two tested noncancerous kidney cell lines (LLC-PK1) with an IC <sub>50</sub> of 16 and 55 µg/ml for ethyl acetate and chloroform extracts, respectively. The oral administration of ethanolic extract (50 & 100 mg/kg, b.w) downregulated the expression of pro-inflammatory cytokines (TNFα, IL-6, & IL-10) and apoptotic markers (caspase-3 and Bax). It upregulated the anti-apoptotic protein Bcl2. Furthermore, NDEE pretreatment significantly downregulated cardiac NF-κB (p65) expression, NF-κB-DNA binding activity, and MPO activity. Histological data showed that pretreatment reduced myonecrosis, edema, and infiltration of inflammatory cells and restored the architecture of cardiomyocytes. | Petroleum ether, chloroform, ethyl acetate, n-butanol, ethanol extracts. | Al Taweel et al., 2017; Orfali et al., 2018; Ahmad et al., 2022.                           |
| <i>Nepeta dschuparensis</i> Bornm            | Leaves        | Reduction on the infarct volume and a significant decrease in the level of IL-β in a model of cerebral artery occlusion and on motor coordination disorder induced by cerebral ischemia in Sprague-Dawley rats.                                                                                                                                                                                                                                                                                                                                                                                                                                                                                                                                                                                                                                                                                                                                                                                           | Ethanol extract                                                          | Mousavi et al., 2017.                                                                      |
| <i>Nepeta laxiflora</i> Benth.               | Aerial parts  | Decreased NO in PC12 cells treated with H <sub>2</sub> O <sub>2</sub> (50% inhibition at 50-200 µg/mL).                                                                                                                                                                                                                                                                                                                                                                                                                                                                                                                                                                                                                                                                                                                                                                                                                                                                                                   | Methanol extract                                                         | Khankandi et al., 2019.                                                                    |
| <i>Nepeta menthoides</i> Boiss. & Buhse      | Aerial parts  | It was explored in the formalin test, xylene test, & hot water tail-immersion test at doses of 70, 350, 700, 1400, & 2800 mg/kg. It was observed to have anti-inflammatory effects at all doses, particularly at a dosage of 2800 mg/kg. As well as in the anti-nociceptive effect in chronic phases. Pretreatment with this ethanolic extract attenuated the development of chronic morphine dependence.                                                                                                                                                                                                                                                                                                                                                                                                                                                                                                                                                                                                 | Hydroalcoholic & ethanol extracts.                                       | Memariani et al., 2018; Süntar et al., 2018.                                               |

| Species                                           | Plant part(s) | Pharmacology activity                                                                                                                                                                                                                                                                                                                                                                                                                                                                                                                                                                                                                                                                                                         | Extract(s)                       | Reference                                                           |
|---------------------------------------------------|---------------|-------------------------------------------------------------------------------------------------------------------------------------------------------------------------------------------------------------------------------------------------------------------------------------------------------------------------------------------------------------------------------------------------------------------------------------------------------------------------------------------------------------------------------------------------------------------------------------------------------------------------------------------------------------------------------------------------------------------------------|----------------------------------|---------------------------------------------------------------------|
| <i>Nepeta meyeri</i><br>Benth.                    | Aerial parts  | Acetone extract exhibited a significant concentration-dependent inhibition of DPPH and NO radical. Furthermore, <i>N. meyeri</i> showed very high reducing power. In DPPH radical and NO• scavenging assays the IC <sub>50</sub> value of extract was 672.2 µg/ml and 165.32 µg/ml, respectively. The data obtained from these <i>in vitro</i> models clearly demonstrated antioxidant potential of acetone extract of <i>N. meyeri</i> .                                                                                                                                                                                                                                                                                     | Acetone extract & essential oil. | Cigremis et al. ,2010; Süntar et al., 2018.                         |
| <i>Nepeta pogonosperma</i><br>Jamzad & Assadi     | Aerial parts  | Essential oil reduced the pain sensation in tail flick and formalin test in both phases (200 mg/kg). In paw edema test significantly reduced the inflammation at 100 and 200 mg/kg.                                                                                                                                                                                                                                                                                                                                                                                                                                                                                                                                           | Essential oil                    | Ali et al., 2012; Khalighi-Sigaroodi et al., 2013.                  |
| <i>Nepeta tenuifolia</i><br>Benth.                | No identified | Inhibition of MAPK activation. Anti-inflammatory activity via TLR4 inhibition, which led to MAPK and NF-κB-mediated signaling in LPS-stimulated macrophages. LPS/IFN-γ in RAW264.7 macrophage cells. could reduce the expression of the NLRP3, iNOS, p65, IL-1β mRNA and P2X7R proteins and significantly reduce NO level.                                                                                                                                                                                                                                                                                                                                                                                                    | Essential oil                    | Shan et al., 2021.                                                  |
| <i>Ocimum basilicum</i><br>L.                     | Roots         | Root extract decreased levels of proinflammatory cytokines in mouse models with induced asthma. Linalool decreased the levels of proinflammatory cytokines in RAW 264.7 macrophages induced with LPS.                                                                                                                                                                                                                                                                                                                                                                                                                                                                                                                         | Organic & aqueous extracts.      | Aminian et al., 2022.                                               |
| <i>Ocimum kilimandscharicum</i><br>Baker ex Gürke | Aerial parts  | Immunostimulatory effect in fish <i>Clarias batrachus</i> . Inhibited the carrageenan-induced edema (100 and 300 mg/kg), mechanical and cold hyperalgesia. Inhibited the carrageenan induced pleurisy reducing the migration of total leukocytes in mice by 82% at a 30 mg/kg. Camphor inhibited all articular parameters induced by zymosan in mice (knee edema, leukocyte infiltration, mechanical hyperalgesia, and NO) at 30 mg/kg. Inhibited the carrageenan induced pleurisy reducing the migration of total leukocytes in mice by 83% at a dosage of 15 mg/kg. A mixture of 1,8 cineole/limonene 1:1: inhibited the carrageenan induced pleurisy reducing the migration of total leukocytes in mice by 80% at 6 mg/kg. | Essential oil & aqueous extract. | de Lima et al., 2014; Nahak & Kanta, 2014; dos Santos et al., 2021. |
| <i>Ocimum labiatum</i><br>(N.E. Br.) A.J. Paton   | Leaves        | <i>O. labiatum</i> extract at a 25 µg/mL non-cytotoxic concentration of extract significantly inhibited the production of pro-inflammatory cytokines, such as IL-2, IL-4, IL-6, and IL-17A. Except for the dual acting pro- or anti-inflammatory cytokine, IL-6, which was upregulated, a non-cytotoxic 50 µM concentration of the isolated labdane diterpenoid compound significantly decreased the production of all the pro-inflammatory cytokines. In the anti-inflammatory pathway studies, the compound also inhibited AP-1 significantly at 50 µM. The extract demonstrated strong dose dependent antioxidant activity with IC <sub>50</sub>                                                                           | Ethanol extract                  | Kapewangolo et al., 2015; Lambrechts & Lall, 2019.                  |



| Species                     | Plant part(s) | Pharmacology activity                                                                                                                                                                                                                                                                                                                                                                                                                                                                                                                                                                                                                                                                                                                                                                                                                                                                                                                                                                                                                                                                                                                                                                                                                                                                                                                                                                                                                                                                                                                                                                                      | Extract(s)                                                                       | Reference                                                                                                                                          |
|-----------------------------|---------------|------------------------------------------------------------------------------------------------------------------------------------------------------------------------------------------------------------------------------------------------------------------------------------------------------------------------------------------------------------------------------------------------------------------------------------------------------------------------------------------------------------------------------------------------------------------------------------------------------------------------------------------------------------------------------------------------------------------------------------------------------------------------------------------------------------------------------------------------------------------------------------------------------------------------------------------------------------------------------------------------------------------------------------------------------------------------------------------------------------------------------------------------------------------------------------------------------------------------------------------------------------------------------------------------------------------------------------------------------------------------------------------------------------------------------------------------------------------------------------------------------------------------------------------------------------------------------------------------------------|----------------------------------------------------------------------------------|----------------------------------------------------------------------------------------------------------------------------------------------------|
|                             |               | values ranging from $13 \pm 0.8$ to $54.86 \pm 1.28$ $\mu\text{g/mL}$ , while the terpene had no antioxidant property. The extract and diterpenoid decreased the production of the inflammatory mediator NO, at non-cytotoxic concentrations. The $\text{CE}_{50}$ of the extract in TZM-bl and PBMCs was $62.6 \pm 0.6$ and $30.1 \pm 0.4$ $\mu\text{g/mL}$ , while that of the compound was $112.6 \pm 0.2$ and $70 \pm 0.4$ $\mu\text{M}$ , respectively.                                                                                                                                                                                                                                                                                                                                                                                                                                                                                                                                                                                                                                                                                                                                                                                                                                                                                                                                                                                                                                                                                                                                               |                                                                                  |                                                                                                                                                    |
| <i>Ocimum sanctum</i> L.    | Aerial parts  | Aqueous and ethanol extracts decrease epithelialization period in lesion models in rats. Decreases the percentage of inflammation in rat models of edema induced with carrageenan and croton oil at doses of 500 mg/kg, p.o. Apigenin, rosmarinic acid, isotimusin, isothymonin, cirsimaritin, cirsilineol, eugenol show COX-1 inhibition in <i>in vitro</i> models with different percentages of inhibition at a concentration range of 10-1000 $\mu\text{M}$ .                                                                                                                                                                                                                                                                                                                                                                                                                                                                                                                                                                                                                                                                                                                                                                                                                                                                                                                                                                                                                                                                                                                                           | Organic & aqueous extracts.                                                      | Pattanayak et al., 2010; Singh et al., 2018.                                                                                                       |
| <i>Ocimum selloi</i> Benth. | Leaves        | inhibited the carrageenan-induced pleurisy in female Swiss mice at 30, 100, and 300 mg/kg.                                                                                                                                                                                                                                                                                                                                                                                                                                                                                                                                                                                                                                                                                                                                                                                                                                                                                                                                                                                                                                                                                                                                                                                                                                                                                                                                                                                                                                                                                                                 | Aqueous extract, essential oil.                                                  | Moraes et al., 2002; Piva et al., 2021.                                                                                                            |
| <i>Origanum spp.</i>        | Aerial parts  | Essential oil lowering TNF- $\alpha$ levels in bronchoalveolar fluid of LPS-induced mice. Decreased mRNA of TNF- $\alpha$ , IL-1B, IL-6, MCP-1, & IFN- $\gamma$ in the jejunum of pigs fed for 28 days with essential oil and induced with endotoxins. Essential oil-NPs decreased NO levels in RAW 264.7 macrophages induced with LPS. Decreased levels of IL-8, IL-1B, & TNF- $\alpha$ in <i>in vivo</i> and <i>in vitro</i> models of inflammation induced by <i>Propionibacterium acnes</i> . Ethanol-water extract protected against hepatotoxic damage in rat models. Ethanol extract at doses of 100-5000 mg/kg, p.o. improved the symptoms of colitis in rats. <i>O. syriacum</i> methanol extract at concentration of 10-100 $\mu\text{g/mL}$ decreases IL-6 & IL-10 levels in peripheral mononuclear cells. <i>O. tyttanthum</i> essential oil shows inhibition of pro-inflammatory enzymes in <i>in vitro</i> models. Carvacrol and thymol exhibited anti-inflammatory effects in <i>in vivo</i> , <i>in vitro</i> , and clinical studies. <i>O. microphyllum</i> infusion produced cell growth inhibition associated with decrease in IL-8 levels in the HT29 colon and in PC3 prostate cancer cells lines. Even though the anti-inflammatoxy activity was not correlated with total phenolic contents, but the antioxidant activity was positively correlated with total phenolics in all herbal infusions. <i>O. sipyleum</i> can be considered as a good source of phenolic compounds such as rosmarinic acid and phlorizin. These compounds are considered as pro-oxidant/pro-inflammatory | Organic (essential oil, ethyl acetate, ethanol, or methanol) & aqueous extracts. | Kogiannou et al., 2013; Zengin et al., 2019; El kharraf et al., 2020; Hamamouchi et al., 2021; Sharifi-Rad et al., 2021; Al-Mijalli et. al., 2022. |

| Species                                   | Plant part(s)         | Pharmacology activity                                                                                                                                                                                                                                                                                                                                                                                                                                                                                                                                                                                                                                                                                                                                                                                                                                                                                                                                                                                                                                                                                                                             | Extract(s)                                                           | Reference                                                                                                                                |
|-------------------------------------------|-----------------------|---------------------------------------------------------------------------------------------------------------------------------------------------------------------------------------------------------------------------------------------------------------------------------------------------------------------------------------------------------------------------------------------------------------------------------------------------------------------------------------------------------------------------------------------------------------------------------------------------------------------------------------------------------------------------------------------------------------------------------------------------------------------------------------------------------------------------------------------------------------------------------------------------------------------------------------------------------------------------------------------------------------------------------------------------------------------------------------------------------------------------------------------------|----------------------------------------------------------------------|------------------------------------------------------------------------------------------------------------------------------------------|
|                                           |                       | <p>biomarkers induced by the extracts, in rat colon challenged with LPS, together with the inhibition of selected bacterial and fungi strains involved in ulcerative colitis and the antiproliferative effect exerted only by ethyl Acetate extract, further support protective effects in inflamed colon as well.</p> <p><i>O. compactum</i> Benth. produced anti-inflammatory activity in Wistar rats in tail-Flick test and in the writhing test in OF1 mice at 100 mg/kg.</p> <p>Anti-inflammatory effect using 5-lipoxygenase inhibition test (IC<sub>50</sub>= 0.68 ± 0.02 µg/mL) and carrageenan-induced paw edema model (56.53% inhibition of edema at 100 mg/kg, p.o.).</p>                                                                                                                                                                                                                                                                                                                                                                                                                                                              |                                                                      |                                                                                                                                          |
| <i>Orthosiphon aristatus</i> (Blume) Miq. | Aerial parts & leaves | Anti-inflammatory effect in <i>in vitro</i> model. Inhibition of 3,5-U-hyaluronase (19.38% at 10 µg/mL). Inhibition of NO, PGE <sub>2</sub> , & ROS in RAW 264.7 macrophages induced with LPS.                                                                                                                                                                                                                                                                                                                                                                                                                                                                                                                                                                                                                                                                                                                                                                                                                                                                                                                                                    | Ethanol extract                                                      | Hsu et al., 2010; Vijayan et al., 2017.                                                                                                  |
| <i>Orthosiphon stamineus</i> Benth.       | No identified         | Anti-inflammatory effect of EM in mouse models at 250-1000 mg/kg, p.o. Anti-inflammatory effects at 500-1000 mg/kg, p.o., in the edema induced with carrageenan. Orthosifol A and B produced strong anti-inflammatory activity against tumors induced in murine models. Antipyretic effect of EE at 50-1000 mg/kg, p.o., in murine models induced with yeast.                                                                                                                                                                                                                                                                                                                                                                                                                                                                                                                                                                                                                                                                                                                                                                                     | Ethanol extract (EM), chloroform extract (EC), ethanol extract (EE). | Singh et al., 2015.                                                                                                                      |
| <i>Perilla frutescens</i> (L.) Britton    | Leaves & seeds        | Reduction of the mRNA expression of IL-6, IL-8, TNF-α, COX-2, & iNOS in RAW 264.7 macrophages induced with LPS. 12-Tetradecanoylphorbol 13-acetate (TPA)-induced edema (50% inhibition at ID <sub>50</sub> =0.09-0.3 mg/per ear). Ursolic acid, corosolic acid, 3-epicorosolic, pomolic acid, stormy acid, hyptadienic acid, oleanolic acid, augustic acid, & 3-epimaslinic acid produced anti-inflammatory effects. Reduction of body weight loss, diarrhea, and bleeding at 20-200 mg/kg, p.o., in mouse models of colitis. Involvement of luteolin by inhibition of edema induced with TPA. Monogalactosyldiacylglycerols inhibited NO, TNF-α, & IL-6 in RAW 264.7 macrophages induced with LPS. Rosmarinic acid (RA) reduced inflammation and oxidative stress and reduced tumor size in skin cancers induced with 7,12-dimethylbenz[a]anthracene (DMBA). The anti-inflammatory targets of RA in tumor therapy are cyclooxygenase-2 (COX-2) and NF-κB. RA inhibited COX-2 activity and downregulated ERK1/2 to exert anti-inflammatory effects in lung, breast, and liver cancer cells. Inflammatory factors, including TNF-α, IL-1β, IL-6, & | Ethanol, methanol, & aqueous extracts. Essential oil.                | Banno et al., 2004; Huang et al., 2014; Ueda et al., 2002; Zuo et al., 2002; Liu et al., 2022b; Kangwan et al., 2021; Zhao et al., 2022. |

| Species                                       | Plant part(s) | Pharmacology activity                                                                                                                                                                                                                                                                                                                                                                                                                                                                                                                                                                                                                                                                                                                                                                | Extract(s)                                         | Reference                 |
|-----------------------------------------------|---------------|--------------------------------------------------------------------------------------------------------------------------------------------------------------------------------------------------------------------------------------------------------------------------------------------------------------------------------------------------------------------------------------------------------------------------------------------------------------------------------------------------------------------------------------------------------------------------------------------------------------------------------------------------------------------------------------------------------------------------------------------------------------------------------------|----------------------------------------------------|---------------------------|
|                                               |               | transforming growth factor- $\beta$ (TGF- $\beta$ ), were reduced after anti-tumor therapy with RA. The anti-inflammatory effect of RA in tumorigenesis has been related to the inhibition of TLR4/NF- $\kappa$ B & STAT3. RA was shown to suppress CRC inflammation by impairing the IL-6/STAT3 and NF- $\kappa$ B pathways. In hepatocellular carcinoma (HCC), H22 tumor-bearing mice were treated with intraperitoneal injection of RA 75, 150, and 300 mg/kg. Inhibition of inflammatory cytokines (IL-1 $\beta$ , IL-6, TNF- $\alpha$ , TGF- $\beta$ ), angiogenic factors (VEGF), & phosphorylation of p65.                                                                                                                                                                    |                                                    |                           |
| <i>Platostoma africanum</i> P. Beauv.         | Aerial parts  | Anti-inflammatory effects of EH produced 45.19% inhibition at 400 mg/kg and ED= 76.10% inhibition at 400 mg/kg in the ovalbumin-induced edema in rats.                                                                                                                                                                                                                                                                                                                                                                                                                                                                                                                                                                                                                               | Hexane extract (EH) & dichloromethane extract.     | Aladedunye et al., 2008.  |
| <i>Plectranthus amboinicus</i> (Lour.) Spreng | Leaves        | At 500 mg/kg b.w. increased concentrations of the cytokine TGF- $\beta$ 1 and GPx in Wistar rats.                                                                                                                                                                                                                                                                                                                                                                                                                                                                                                                                                                                                                                                                                    | Ethanol extract 90%.                               | Solfaine et al., 2021.    |
| <i>Plectranthus barbatus</i> Andrews          | Leaves        | Attenuation in the production of IL-2, IL-6, IL-10, TNF, & IL-17A at 25 $\mu$ g/mL in mononuclear cells infected with HIV-1.                                                                                                                                                                                                                                                                                                                                                                                                                                                                                                                                                                                                                                                         | Ethanol extract                                    | Kapewangolo et al., 2013. |
| <i>Plectranthus caninus</i> Vatke             | Aerial parts  | Anti-inflammatory effects in the edema induced with carrageenan ( $38.96 \pm 16.59\%$ inhibition at 300 mg/mL) in Swiss mice.                                                                                                                                                                                                                                                                                                                                                                                                                                                                                                                                                                                                                                                        | Essential oil                                      | Tadesse et al., 2011.     |
| <i>Plectranthus ecklonii</i> Benth.           | Aerial parts  | NO inhibition in RAW 264.7 macrophages induced by LPS at 100 $\mu$ M. Parvifloron D, a mixture of $\beta$ -sitosterol & stigmasterol (1:1) were involved in the anti-inflammatory effect.                                                                                                                                                                                                                                                                                                                                                                                                                                                                                                                                                                                            | Parvifloron D, $\beta$ -sitosterol, & stigmasterol | Andrade et al., 2018.     |
| <i>Plectranthus ornatus</i> Codd.             | Aerial parts  | Molecular docking shows potential anti-inflammatory effect for 1,6-di-O-acetyl-9-deoxyforskolin docked to IL-6 (−12.16 kcal/mol), TNF- $\alpha$ (−15.18 kcal/mol) and GM-CSF (−13.84 kcal/mol) and for 1,6-di-O-acetylforskolin docked at IL-8 (−16.26 kcal/mol). <i>In vivo</i> studies demonstrated that oral administration of forskolin (10 mg/kg) exerts a strong anti-inflammatory effect by reducing paw swelling (87.79%), comparable to the standard drug indomethacin (10 mg/kg, 93.89%). The labdane diterpene inhibited NO production by LPS in RAW 264.7 cells with an IC <sub>50</sub> value of 40.1 $\mu$ M. (11R*,13E)-11-acetoxyhalima-5,13-dien-15-oic acid, 1 $\alpha$ ,6 $\beta$ -diacetoxy-8 $\alpha$ ,13R*-epoxy-14-labden-11-one and 1,6-di-O-acetylforskolin |                                                    | Sitarek et al., 2022.     |

| Species                                         | Plant part(s)                                            | Pharmacology activity                                                                                                                                                                                                                                                                                                                                                                                                                                                                                                                                                                                                                                                                                                                                                                                                                                                                                                                                                                                                                                     | Extract(s)                                                                                       | Reference                                                                                                                                                                            |
|-------------------------------------------------|----------------------------------------------------------|-----------------------------------------------------------------------------------------------------------------------------------------------------------------------------------------------------------------------------------------------------------------------------------------------------------------------------------------------------------------------------------------------------------------------------------------------------------------------------------------------------------------------------------------------------------------------------------------------------------------------------------------------------------------------------------------------------------------------------------------------------------------------------------------------------------------------------------------------------------------------------------------------------------------------------------------------------------------------------------------------------------------------------------------------------------|--------------------------------------------------------------------------------------------------|--------------------------------------------------------------------------------------------------------------------------------------------------------------------------------------|
|                                                 |                                                          | & 1,6-di-O-acetyl-9-deoxyforskolin possess anti-inflammatory effect in LPS-induced ARPE-19 cells by reducing the level of expression of IL-6, IL-8, TNF- $\alpha$ and GM-CSF genes.                                                                                                                                                                                                                                                                                                                                                                                                                                                                                                                                                                                                                                                                                                                                                                                                                                                                       |                                                                                                  |                                                                                                                                                                                      |
| <i>Plectranthus zeylanicus</i> Benth.           | Whole plant                                              | 5-lipoxygenase (5-LO) activity was potently suppressed (inhibition >85%), in A23187-stimulated human neutrophils (IC <sub>50</sub> = 6.6 & 12 $\mu$ g/mL, respectively), & inhibited isolated human recombinant 5-LO (IC <sub>50</sub> = 0.7 & 1.2 $\mu$ g/mL, respectively). Inhibition of 5-LO activity with IC <sub>50</sub> values of 1.3 $\mu$ g/mL in cell-free assay using isolated human recombinant 5-LO; and 5.1 $\mu$ g/mL in cell-based assays (human neutrophils challenged with A23187 plus exogenous arachidonic acid).                                                                                                                                                                                                                                                                                                                                                                                                                                                                                                                    | Hexane & dichloromethane extracts.                                                               | Napagoda et al., 2014.<br>Napagoda et al., 2022.                                                                                                                                     |
| <i>Prunella laciniata</i> L.                    | Aerial parts                                             | <i>In vitro</i> NO production by LPS-stimulated murine peritoneal macrophages of 6 weeks old mice with two aqueous extracts at a concentration of 400 $\mu$ g/mL was significantly inhibited (1.501 and 0.347 $\mu$ g/mL, respectively) without affecting cell viability.                                                                                                                                                                                                                                                                                                                                                                                                                                                                                                                                                                                                                                                                                                                                                                                 | Aqueous extract                                                                                  | Sebnem-Harput et al., 2006.                                                                                                                                                          |
| <i>Prunella vulgaris</i> L.                     | Aerial parts; leaves and stem; whole plant; fruit spikes | Anti-inflammatory effect in the model of inflammation induced with TNF- $\alpha$ in HASMCs and in the model of ovalbumin-induced conjunctivitis in rats. Inhibition of IL-1 $\beta$ , caspase-1, & NLRP3 in corneal tissue. Participation of 2 $\alpha$ ,3 $\alpha$ ,23-trihydroxyursal-12,20(30)-dien-28-oic acid, $\beta$ -amyrin & eusapic acid at 46.7, 57.9, & 54.2% suppression of histamine in <i>in vitro</i> models, respectively. Inhibition of NO, IL-6 and PEG2, iNOS, COX-2, TNF- $\alpha$ mRNA in RAW 264.7 macrophages induced with LPS. Anti-inflammatory effect in rats. Dimethylbenzene-induced oedema (25 % inhibition). 2 $\alpha$ , 3 $\alpha$ -dihydroxyursolic acid. Anti-inflammatory effect. Decreased $\beta$ -hexosaminidase in RBL-2H3 cells (IC <sub>50</sub> =57 $\mu$ M). Prunelanato A y Pruneladiterpenol A: Decrease of NO in RAW 264.7 macrophages induced with LPS. (IC <sub>50</sub> =6.77 y 8.61 $\mu$ M). Significant enhancement of procollagen type I mRNA, TNF- $\alpha$ and IL-6 levels in UVB-activated MMPs. | Methanol, ethanol 50% & aqueous extracts. Hexane fraction from ethanol extract, & essential oil. | Park et al., 2013<br>Li et al., 2020<br>Choia et al., 2016<br>Hwang et al., 2013<br>Yan, 2016<br>Tang et al., 2022<br>Ryu et al., 2000<br>Zheng et al., 2022<br>Zhang et al., 2018b. |
| <i>Pycnostachys reticulata</i> (E. Mey.) Benth. | Roots                                                    | A 68.7% inhibition of the COX-2 at 0.25 $\mu$ g/ $\mu$ L in an <i>in vitro</i> test.                                                                                                                                                                                                                                                                                                                                                                                                                                                                                                                                                                                                                                                                                                                                                                                                                                                                                                                                                                      | Methanol extract 50%.                                                                            | Fawole et al., 2010.                                                                                                                                                                 |

| Species                                         | Plant part(s) | Pharmacology activity                                                                                                                                                                                                                                                                                                                                                                                                                                                                                                                                                       | Extract(s)                                  | Reference                                                                                            |
|-------------------------------------------------|---------------|-----------------------------------------------------------------------------------------------------------------------------------------------------------------------------------------------------------------------------------------------------------------------------------------------------------------------------------------------------------------------------------------------------------------------------------------------------------------------------------------------------------------------------------------------------------------------------|---------------------------------------------|------------------------------------------------------------------------------------------------------|
| <i>Salvia aegyptiaca</i> L.                     | Whole plant   | Decreased temperature in a model of hyperthermia induced in mice at 0.25-2 g/kg.                                                                                                                                                                                                                                                                                                                                                                                                                                                                                            | Acetone extract.                            | Al-Yousuf et al., 2002.                                                                              |
| <i>Salvia aethiophis</i> (Kunth) Lint. & Epling | Roots         | Inhibition of 5-lipoxygenase activity in an <i>in vitro</i> assay with human neutrophils. Reduction in the leukocyte accumulation & inhibition of cytokines. Participation of luteolin & apigenin.                                                                                                                                                                                                                                                                                                                                                                          | Acetone extract.                            | Hernández-Pérez et al., 1995; Benrezzouk et al., 2001; Nworu and Akah, 2015; Vulganová et al., 2019. |
| <i>Salvia africana-caerulea</i> L.              | Aerial parts  | Ability in scavenging NO. Activator of the human peroxisome, proliferator-activated receptor gamma, inhibitor of the 5-lipoxygenase enzyme.                                                                                                                                                                                                                                                                                                                                                                                                                                 | Aqueous, methanol, & chloroform extracts.   | Komatou et al., 2006; Kamatou et al., 2010; Bonito et al., 2011; Afonso et al., 2019.                |
| <i>Salvia albicaulis</i> Benth.                 | Aerial parts  | 5-lipoxygenase (5-LO) activity was inhibited by 50% (IC <sub>50</sub> ) when adding the 5-LO enzyme and the absorbance arising from the modification. It may be attributed to the high percentage of sesquiterpenes, such as the linoleic acid (diene 1–4 converted into diene 1–3). IC <sub>50</sub> 39±4 & 65±6 µg/ml, respectively.                                                                                                                                                                                                                                      | Essential oil .                             | Kamatou et al., 2007.                                                                                |
| <i>Salvia apiana</i> Jeps.                      | Aerial parts  | The potency to counteract NO production was evaluated in an LPS-activated RAW 264.7 macrophage model and its potency corresponded to about one-third of the drug dexamethasone (EC <sub>50</sub> = 49.9 ± 2.5 µg/mL & 16.0 ± 1.0 µg/mL, respectively).                                                                                                                                                                                                                                                                                                                      | Aqueous extract                             | Afonso et al., 2019.                                                                                 |
| <i>Salvia ceratophylla</i> L.                   | Aerial parts  | Inhibition of NO production and NF-κB activation, as well as in the edema induced using an <i>in vivo</i> assay.                                                                                                                                                                                                                                                                                                                                                                                                                                                            | Hexane, ethyl acetate, & methanol extracts. | Shehadeh et al., 2014; Bonesi et al., 2017; Abu-Darwish et al., 2020.                                |
| <i>Salvia chamelaeagnea</i> Bergius             | Aerial parts  | 5-lipoxygenase assay was used as an indication of the anti-inflammatory activity. The extract displayed poor inhibition of the 5-lipoxygenase enzyme, with IC <sub>50</sub> greater than 100 µg/mL. Essential oil exhibited promising anti-inflammatory activity by inhibiting the 5-lipoxygenase enzyme with IC <sub>50</sub> values from 43.4 ± 3.5 to 77.3 ± 5.2 µg/mL. Compounds such as 1,8-cineole displayed anti-inflammatory activity and monoterpenes such as α-pinene and sesquiterpenes & β-caryophyllene inhibited the <i>in vitro</i> 5-lipoxygenase activity. | Methanol-chloroform extract, essential oil. | Kamatou et al., 2006; Kamatou et al., 2010.                                                          |
| <i>Salvia chudei</i> Batt. & Trab.              | Aerial parts  | Anti-inflammatory activity in the edema induced with carrageenan showing a 58% inhibition at 250-1000 mg/kg, b.w.                                                                                                                                                                                                                                                                                                                                                                                                                                                           | Aqueous extract                             | Semaoui et al., 2021.                                                                                |

| Species                                     | Plant part(s)         | Pharmacology activity                                                                                                                                                                                                                                                                                                                                                                                                                                                                                                                                                              | Extract(s)                                                                    | Reference                                                                                       |
|---------------------------------------------|-----------------------|------------------------------------------------------------------------------------------------------------------------------------------------------------------------------------------------------------------------------------------------------------------------------------------------------------------------------------------------------------------------------------------------------------------------------------------------------------------------------------------------------------------------------------------------------------------------------------|-------------------------------------------------------------------------------|-------------------------------------------------------------------------------------------------|
| <i>Salvia desoleana</i><br>Atzei & P. Picci | Aerial parts & leaves | Inhibition of carrageena n- and histamine- induced oedema in rats.                                                                                                                                                                                                                                                                                                                                                                                                                                                                                                                 | Essential oil                                                                 | Peana & Satta, 1993; Peana et al., 1999; Ceschel et al., 2000; Peana & moretti, 2002.           |
| <i>Salvia digitaloides</i><br>Diels         | Roots                 | Inhibitory effects against the release of both O <sub>2</sub> and elastase by human neutrophils, with IC <sub>50</sub> values of 48.98 ± 1.60 & 25.22 ± 4.41 µM, respectively. These results suggested that Salviatalin A may represent a good candidate as a new anti-inflammatory agent.                                                                                                                                                                                                                                                                                         | Methanol extract                                                              | Shwu-Jen et al., 2010.                                                                          |
| <i>Salvia dolomitica</i><br>Codd.           | Aerial parts          | Inhibition of 5-lipoxygenase in an <i>in vitro</i> assay with a IC <sub>50</sub> : 65±6 µg/mL.                                                                                                                                                                                                                                                                                                                                                                                                                                                                                     | Essential oil                                                                 | Kamatou et al., 2007.                                                                           |
| <i>Salvia dominica</i> L.                   | Leaves & roots        | The anti-inflammatory activity of sesterterpenes was observed.                                                                                                                                                                                                                                                                                                                                                                                                                                                                                                                     | Acetone extract                                                               | Dal Piaz et al., 2010.                                                                          |
| <i>Salvia frigida</i> L.                    | leaves                | Reduction of proinflammatory cytokine levels and improvement of induced dermatitis in mice after topical administration.                                                                                                                                                                                                                                                                                                                                                                                                                                                           | Phenolic fraction                                                             | Hassan et al., 2022.                                                                            |
| <i>Salvia fruticosa</i><br>Mill.            | Root & aerial parts   | Anti-inflammatory effect in the carrageenan-induced edema (44% inhibition at 200 mg/kg, i.p. in rats.                                                                                                                                                                                                                                                                                                                                                                                                                                                                              | Methanol extract                                                              | Boukhary et al., 2016.                                                                          |
| <i>Salvia glutinosa</i> L.                  | Aerial parts          | Reduced NO production in LPS-treated RAW 264.7 cells with an IC <sub>50</sub> = 304.93±11.19 µg/mL.                                                                                                                                                                                                                                                                                                                                                                                                                                                                                | Ethanol extract 70%.                                                          | Nicolescu et al., 2022.                                                                         |
| <i>Salvia hierosolymitana</i><br>Boiss.     | Aerial parts          | The topical anti-inflammatory activity was evaluated as inhibition of the Croton oil-induced ear oedema in mice. Inflammatory response was induced on the inner surface of the right ear (surface: about 1 cm <sup>2</sup> ) by application of 80 µg of Croton oil dissolved in vehicle. At a dose of 300 µg/cm <sup>2</sup> . The extracts reduced oedema by involving 3b,23-dihydroxyurs-12-en- 28-oic acid, 2a,3b-dihydroxyolean-12-en-28-oic & maslinic acid, 2a,3b,23-trihydroxyolean-12-en-28-oic or arjunolic acid were the most active with 54%, 51%, & 60%, respectively. | Petroleum ether, chloroform, chloroform:met hanol (9:1), & methanol extracts. | De Felice et al., 2006; de Souza et al., 2021.                                                  |
| <i>Salvia hypoleuca</i><br>DC. ex Benth.    | Leaves & fruits       | Inhibition of the carrageenan induced paw edema. Prevented NO production in the aqueous humor and the expression of the iNOS enzyme in a dose-dependent manner. Inhibited the development of EIU and suppressed LPS-induced iNOS expression. Inhibited the release of NF-κB-dependent cytokines including TNF-α and IL-6. Opioid system and inhibition of proinflammatory mediators.                                                                                                                                                                                               | Ethanol extract                                                               | Estakhr & Javdan, 2011; Estakhr & Javdan, 2011a; Javdan & Estakhr, 2011b; Parsaei et al., 2016. |

| Species                            | Plant part(s) | Pharmacology activity                                                                                                                                                                                                                                                                                                                                                                                                                                                                                                                                                                                                                                                                                                                         | Extract(s)                         | Reference                           |
|------------------------------------|---------------|-----------------------------------------------------------------------------------------------------------------------------------------------------------------------------------------------------------------------------------------------------------------------------------------------------------------------------------------------------------------------------------------------------------------------------------------------------------------------------------------------------------------------------------------------------------------------------------------------------------------------------------------------------------------------------------------------------------------------------------------------|------------------------------------|-------------------------------------|
| <i>Salvia japonica</i> Thunb.      | Aerial parts  | The anti-inflammatory activities were measured via the mice ear edema induced by TPA. Ibuprofen was used as a positive control, EO was diluted with peanut oil in BALB/c mice. The optimum dose of EO was 100 mg/kg, which produced $31.15 \pm 1.38\%$ of swelling-inhibition. The EO was like ibuprofen in the degree of reduction of COX-2, NF- $\kappa$ B (p65), & IL-6, and better than ibuprofen in the degree of reduction of TNF- $\alpha$ . Exhibited promising anti-inflammatory activity by inhibiting the expression of IL-1, IL-6, TNF- $\alpha$ , and COX-2 in rats with adjuvant arthritis. At a concentration of 100 mg/kg exhibited inhibitory effects on arthritis similar to ibuprofen.                                     | Essential oil (EO)                 | Li et al., 2021.; Sun et al., 2022. |
| <i>Salvia lachnostachys</i> Benth. | Leaves        | The anti-inflammatory effects of the EE & fruticulin A were evaluated in mice using experimental models of inflammation (paw oedema & pleurisy induced by carrageenan injection). Oral administration of 30, 100, and 300 mg/kg and fruticulin A (0.3 and 3.0 mg/kg) decreased the total leucocytes number in pleural lavage, protein extravasation, and paw oedema in a dose-dependent manner. Fruticulin A significantly decreased paw oedema in mice at doses of 1.0 and 3.0 mg/kg, with no significant difference between the doses. In the pleurisy test, the number of total leukocytes decreased significantly in mice treated with 30, 100, or 300 mg/kg compared to the control group, with no significant difference between doses. | Ethanol extract                    | Piccinelli et al., 2014.            |
| <i>Salvia lanceolata</i> Lam.      | Leaves        | Exhibited poor anti-inflammatory activity with a $IC_{50} > 100 \mu\text{g/mL}$ against 5-lipoxygenase (5-LO).                                                                                                                                                                                                                                                                                                                                                                                                                                                                                                                                                                                                                                | Methanol-chloroform (1:1) extract. | Kamatou et al., 2010.               |
| <i>Salvia lanigera</i> Poir.       | Leaves        | The <i>in vitro</i> anti-inflammatory potential of the extract was evaluated by determining the membrane stabilization of human red blood cells and the percent inhibition of the COX1/2, 5LOX, and sPLA2-V enzymes. The extract showed maximum membrane stabilization ( $\leq 91\%$ , at $100 \mu\text{g/mL}$ ) and the reference drug diclofenac sodium (90.75%). Strong inhibition of 5-LOX and COX-1 enzymes at $100 \mu\text{g/mL}$ . At the concentration of $100 \mu\text{g/mL}$ , the membrane stabilization was $92.10 \pm 1.27\%$ , and very close to that of diclofenac sodium ( $90.75 \pm 1.06\%$ ).                                                                                                                             | Ethanol extract                    | Alonazi, et al., 2021.              |

| Species                                     | Plant part(s)                | Pharmacology activity                                                                                                                                                                                                                                                                                                                                                                                                                                                                                                            | Extract(s)                         | Reference                                                                                           |
|---------------------------------------------|------------------------------|----------------------------------------------------------------------------------------------------------------------------------------------------------------------------------------------------------------------------------------------------------------------------------------------------------------------------------------------------------------------------------------------------------------------------------------------------------------------------------------------------------------------------------|------------------------------------|-----------------------------------------------------------------------------------------------------|
| <i>Salvia leriifolia</i> Benth.             | Aerial parts, leaves & seeds | Anti-inflammatory effect in the xylene or acetic acid induced edema in rats using 2.5-5 g/kg. NO inhibition in RAW 264.7 macrophages induced with LPS with an IC <sub>50</sub> = 165 µg/mL.                                                                                                                                                                                                                                                                                                                                      | Aqueous extract & essential oil.   | Hosseinzadeh & Yavary, 1999; Loizzo et al., 2009; Hosseinzadeh et al., 2003; Modarres et al., 2014. |
| <i>Salvia macilenta</i> Boiss.              | Aerial parts                 | Anti-inflammatory effects in murine models induced with beta-amyloid at 50 mg/kg/10 days, p.o.                                                                                                                                                                                                                                                                                                                                                                                                                                   | Methanol extract                   | Taheri et al., 2021.                                                                                |
| <i>Salvia miltiorrhiza</i> Bunge            | Roots                        | Tanshinone IIA: Downregulation of proinflammatory cytokines in <i>in vitro</i> models. It was effective against allergies, asthma, and rhinitis in clinical models. While in murine models an attenuation of proinflammatory cytokines was observed. It presented anticancer properties through reduction of proinflammatory cytokines in murine models and relief against fibrosis in liver, heart, lung, kidneys using high polarity extracts as well as from isolated compounds in <i>in vitro</i> and <i>in vivo</i> models. |                                    | Feng et al., 2021; Mahalaksmi et al., 2021; Yang et al., 2022.                                      |
| <i>Salvia mirzayanii</i> Rech. f. & Esfand. | Aerial parts                 | A 66.2 ± 8% inhibition of NO at 50 µg/mL in LPS-treated RAW 264.7 cells. The LPS-induced DNA binding activity of NF-κB in THP-1 was significantly decreased by teuclatriol (312 & 390 mM). Teuclatriol reduced the production of TNF-α in a dose-dependent manner.                                                                                                                                                                                                                                                               | Methanol extract                   | Zarshenas et al., 2014; Ziaei et al., 2015; Amirghofran et al., 2011.                               |
| <i>Salvia moorcroftiana</i> Wall. ex Benth. | Whole plant                  | Anti-inflammatory and antipyretic effects at 300 mg/kg, p.o., in murine models.                                                                                                                                                                                                                                                                                                                                                                                                                                                  | Methanol extract                   | Hussain et al., 2017.                                                                               |
| <i>Salvia muirii</i> (L.) Bol.              | Aerial parts                 | Exhibited poor anti-inflammatory activity with an IC <sub>50</sub> >100 µg/mL against 5-LO.                                                                                                                                                                                                                                                                                                                                                                                                                                      | Methanol:chloroform (1:1) extract. | Kamatou et al., 2006; Kamatou et al., 2010.                                                         |
| <i>Salvia multicaulis</i> Vahl              | Aerial parts                 | Topical anti-inflammatory activity against Croton oil-induced edema in CD-1 mice (47 – 300 µg/cm <sup>2</sup> ).                                                                                                                                                                                                                                                                                                                                                                                                                 | Hexane & ethyl acetate extracts.   | Shehadeh et al., 2014; Rowshan & Najafian, 2020.                                                    |
| <i>Salvia nipponica</i> Miq.                | Root & leaves                | Elastase inhibitory activity in human neutrophils induced with formyl-methionyl-l-leucyl-l-phenylalanine/cytochalasin B.                                                                                                                                                                                                                                                                                                                                                                                                         | Methanol extract                   | Chan et al., 2011.                                                                                  |



| Species                                                 | Plant part(s)         | Pharmacology activity                                                                                                                                                                                                                                                                                                                                                                                                                                                                                                                                                                                                                                   | Extract(s)                                                                                                               | Reference                                                                                       |
|---------------------------------------------------------|-----------------------|---------------------------------------------------------------------------------------------------------------------------------------------------------------------------------------------------------------------------------------------------------------------------------------------------------------------------------------------------------------------------------------------------------------------------------------------------------------------------------------------------------------------------------------------------------------------------------------------------------------------------------------------------------|--------------------------------------------------------------------------------------------------------------------------|-------------------------------------------------------------------------------------------------|
| <i>Salvia officinalis</i> L.                            | Leaves                | Anti-inflammatory properties in murine models, whose main component involved in the effect was ursolic acid.                                                                                                                                                                                                                                                                                                                                                                                                                                                                                                                                            | Organic and aqueous extracts.                                                                                            | Miraj & Kiani, 2016.                                                                            |
| <i>Salvia palaestina</i> Benth.                         | No identified         | An <i>in vitro</i> anti-inflammatory potential at a concentration of 100 µg/mL using the LO enzyme inhibition assay. The highest inhibition rates were observed with an IC <sub>50</sub> values of SP-EtOAc and SP-CH <sub>2</sub> Cl determined as 93.37 and 83.25 mg/mL, respectively. An IC <sub>50</sub> values of rosmarinic acid (78% LO inhibitory activity) and methyl rosmarinate (96% LO inhibitory activity) were calculated as 0.21 and 0.02 µM, respectively.                                                                                                                                                                              | Fractionation of the methanol extract, dichloromethane (SP-CH <sub>2</sub> CL <sub>2</sub> ) & ethyl acetate (SP-EtOAc). | Sina-Içen et al., 2021.                                                                         |
| <i>Salvia petrophilla</i> G. X. Hu, E. D. Liu & Yan Liu | Whole plant           | Inhibición de NO en macrófagos RAW 264.7 inducidos con LPS IC <sub>50</sub> = 29-40 µM.                                                                                                                                                                                                                                                                                                                                                                                                                                                                                                                                                                 | Acetone extract                                                                                                          | Zou et al., 2022.                                                                               |
| <i>Salvia plebeia</i> R. Br.                            | Leaves & aerial parts | Inhibition of TNF-α, IL-5, & NO in RAW 264.7 macrophages induced with LPS. Inhibition of eosinophils, IL-4, IL-13, & mucus production in BAL B/c mouse model of asthma. Decreased NO & iNOS mRNA expression in RAW 264.7 macrophages induced with LPS. 8-epi-eudebeiolide C inhibited NO & mRNA expression for iNOS in RAW 264.7 macrophages induced with LPS with an IC <sub>50</sub> = 17.9 µM. Salviplenoide A inhibited NO, iNOS, COX-2, & NF-κB mRNA expression in LPS-induced RAW 264.7 macrophages. Luteoloside, nepitrin, homoplantagenin, luteolin, nepetin, hispidulin, & eupatorine inhibited NO, PGE <sub>2</sub> , & iNOS mRNA expression. | Ethanol & methanol extracts.                                                                                             | Jeong et al., 2012; Akram et al., 2015; Jang et al., 2016; Jang et al., 2017; Zou et al., 2018. |
| <i>Salvia prionitis</i> Hance                           | Aerial parts          | All compounds were evaluated for their inhibitory effects on NO production stimulated by LPS in RAW264.7 mouse peritoneal macrophages cell. L -NMMA (NG-Monomethyl- L -arginine, Monoacetate Salt) was used as a positive control with an IC <sub>50</sub> =32.55 µM. Prionidipene and salvilenone showed potent inhibitory activity with the IC <sub>50</sub> = 14.56 & 15.11 µM, respectively.                                                                                                                                                                                                                                                        | Organic extracts                                                                                                         | Li et al., 2018.                                                                                |

| Species                                                                                                      | Plant part(s)          | Pharmacology activity                                                                                                                                                                                                                                                                                                                                                                                                                                                                                                                                                                                                                                                                                                                                                                                                                                                                                                                                                                            | Extract(s)                                                    | Reference                                                                                   |
|--------------------------------------------------------------------------------------------------------------|------------------------|--------------------------------------------------------------------------------------------------------------------------------------------------------------------------------------------------------------------------------------------------------------------------------------------------------------------------------------------------------------------------------------------------------------------------------------------------------------------------------------------------------------------------------------------------------------------------------------------------------------------------------------------------------------------------------------------------------------------------------------------------------------------------------------------------------------------------------------------------------------------------------------------------------------------------------------------------------------------------------------------------|---------------------------------------------------------------|---------------------------------------------------------------------------------------------|
| <i>Salvia radula</i> Benth.                                                                                  | Aerial parts           | Displayed moderate anti-inflammatory activity with an IC <sub>50</sub> = 78.8 ± 5.89 µg/mL against 5-LO.                                                                                                                                                                                                                                                                                                                                                                                                                                                                                                                                                                                                                                                                                                                                                                                                                                                                                         | Methanol-chloroform (1:1) extract.                            | Kamatou et al., 2010.                                                                       |
| <i>Salvia repens</i> Burch. ex Benth.                                                                        | Aerial parts           | Poor anti-inflammatory activity with an IC <sub>50</sub> >100 µg/mL against 5-LO.                                                                                                                                                                                                                                                                                                                                                                                                                                                                                                                                                                                                                                                                                                                                                                                                                                                                                                                | Methanol-chloroform (1:1) extract.                            | Kamatou et al., 2010.                                                                       |
| <i>Salvia rosmarinus</i> (L.) J.B. Walker, B.T. Drew & J.G. González (Syn. <i>Rosmarinus officinalis</i> L.) | Aerial parts           | Essential oil reduced the paw edema similarly to the indomethacin treated group (positive control, 10 mg/kg, p.o) in a dose-dependent manner with an ED <sub>50</sub> = 300 mg/kg. Granulomatous tissue formation was inhibited by 59% compared to the negative control group (saline solution, 0.5 ml, p.o), and ear edema was inhibited by 77%. A Significant inhibition in the carrageenan-induced edema formation 1–4 h after carrageenan treatment, also, significantly reduced the volume of pleural inflammatory exudate and the number of migrated cells. Inhibition of arachidonic acid cascade enzymes by the presence of 1,8-cineole & inhibition of NF-κB by some monoterpenes. Carnosic acid was a potent NO inhibitor at low concentrations (6.2 µg/mL). A reduced skin lesions in mice with atopic dermatitis and reduced the amounts of immunoglobulin E, neutrophils, and inflammatory cytokines in the blood, as well as reduced NO production in LPS-treated RAW 264.7 cells. | Essential oil                                                 | Sousa et al., 2019; Malvezzi et al., 2020.                                                  |
| <i>Salvia runcinata</i> L. f.                                                                                | Aerial parts           | 5-LOX and 5 LO inhibitors.                                                                                                                                                                                                                                                                                                                                                                                                                                                                                                                                                                                                                                                                                                                                                                                                                                                                                                                                                                       | Methanol extract; methanol:chloroform extract. Essential oil. | Komatou et al., 2005; Kamatou et al., 2008; Kamatou & Viljoen, 2010; Komatou et al., 2010a. |
| <i>Salvia sagittata</i> Ruiz & Pav.                                                                          | Aerial parts           | Treatment of the EE did not affect the cell viability, while it showed a remarkable ability to reduce LPS-induced production of proinflammatory cytokines and increase the expression of HO-1 in the primary cultures of porcine aortic endothelial cells. It is possible to hypothesize that the cinnamic acid derivative gives the main contribution to the anti-inflammatory effects of the extract.                                                                                                                                                                                                                                                                                                                                                                                                                                                                                                                                                                                          | Ethanol extract (EE)                                          | Mahmoud, et al., 2019; Tubon et al., 2019.                                                  |
| <i>Salvia sclarea</i> L.                                                                                     | Aerial parts & leaves. | Inhibition of IL-1β, IL-6, & TNF-α in rat model of periodontal inflammation at 200 mg/kg, p.o., and in the carrageenan-induced edema (73% inhibition at 250 mg/kg, s.c.). Sclareol reduced the expression of markers of myocardial injury at 5 mg/kg/day in C57BL/6 mice.                                                                                                                                                                                                                                                                                                                                                                                                                                                                                                                                                                                                                                                                                                                        | Essential oil & ethanol extract.                              | Moretti et al., 1997; Zhong et al., 2015; Kostic et al., 2017; Yang et al., 2022.           |

| Species                                                        | Plant part(s)             | Pharmacology activity                                                                                                                                                                                                                                                                                                                                                                                                                                                                                                                                                                                                                                                                                                                                                                                | Extract(s)                                              | Reference                                                                   |
|----------------------------------------------------------------|---------------------------|------------------------------------------------------------------------------------------------------------------------------------------------------------------------------------------------------------------------------------------------------------------------------------------------------------------------------------------------------------------------------------------------------------------------------------------------------------------------------------------------------------------------------------------------------------------------------------------------------------------------------------------------------------------------------------------------------------------------------------------------------------------------------------------------------|---------------------------------------------------------|-----------------------------------------------------------------------------|
|                                                                |                           | Diminution in the expression levels of MMPs, iNOS, & COX-2 in isolated rabbit chondrocytes at 10 µg/mL, as well as in the cartilage degradation in rabbit osteoarthritis model.                                                                                                                                                                                                                                                                                                                                                                                                                                                                                                                                                                                                                      |                                                         |                                                                             |
| <i>Salvia sclareoides</i> Brot.                                | Aerial parts              | Moderate inhibition of COX-1 in an <i>in vitro</i> assay with an IC <sub>50</sub> = 271.0 ± 4.0 µg/mL.                                                                                                                                                                                                                                                                                                                                                                                                                                                                                                                                                                                                                                                                                               | Aqueous extract                                         | Batista et al., 2017.                                                       |
| <i>Salvia splendens</i> Sellow ex Nees                         | Aerial parts              | Anti-inflammatory effects of the aqueous extract (100 mg/kg/day, p.o.) was observed close to the effect of the standard indomethacin.                                                                                                                                                                                                                                                                                                                                                                                                                                                                                                                                                                                                                                                                | Methanol extract 70%, aqueous & ethyl acetate extracts. | El Sawi et al., 2021.                                                       |
| <i>Salvia syriaca</i> L.                                       | Aerial parts              | Anti-inflammatory activity was observed in the xylene-induced ear edema. The dexamethasone and ethanolic extract at doses of 50 and 100 mg/kg, i.p. significantly reduced the ear edema in a dose-dependent manner. The order of the topical anti-inflammatory effect for the Hex extracts was: <i>S. syriaca</i> > <i>S. palaestina</i> > <i>S. spinosa</i> > <i>S. multicaulis</i> > <i>S. dominica</i> > <i>S. ceratophylla</i> . However, for EtOAc extracts the rank order was: <i>S. multicaulis</i> > <i>S. palaestina</i> > <i>S. ceratophylla</i> > <i>S. spinosa</i> > <i>S. syriaca</i> > <i>S. dominica</i> . Whereas MeOH extracts rank order was: <i>S. spinosa</i> > <i>S. multicaulis</i> > <i>S. dominica</i> > <i>S. palaestina</i> > <i>S. syriaca</i> > <i>S. ceratophylla</i> . | Ethanol, hexane, ethyl acetate & methanol extracts.     | Eidi et al., 2011; Shehadeh et al., 2014.                                   |
| <i>Salvia transsylvanica</i> (Schur ex Griseb. & Schenk) Schur | Aerial parts              | Anti-inflammatory effect in the edema induced with carrageenan (75% inhibition at 1000 mg/kg)                                                                                                                                                                                                                                                                                                                                                                                                                                                                                                                                                                                                                                                                                                        | Ethanol extract 70%.                                    | Maklad et al., 1999.                                                        |
| <i>Salvia virgata</i> Ortega                                   | Aerial parts              | Anti-inflammatory effect in rats in the edema induced with carrageenan at 100 mg/kg, p.o.                                                                                                                                                                                                                                                                                                                                                                                                                                                                                                                                                                                                                                                                                                            | Methanol extract                                        | Akkol et al., 2008; Küpeli et al., 2008; Grzegorzczuk-Karolak et al., 2022. |
| <i>Satureja cuneifolia</i> Ten.                                | Aerial parts in flowering | Anti-inflammatory effect was observed in the first hour, but it was reduced after 4 h.                                                                                                                                                                                                                                                                                                                                                                                                                                                                                                                                                                                                                                                                                                               | Organic extracts                                        | Momtaz & Abdollahi 2010; Taskin et al. 2020.                                |

| Species                                   | Plant part(s)                          | Pharmacology activity                                                                                                                                                                                                                                                                                                                                                                                                                                                                                                                                                 | Extract(s)                                                            | Reference                                                                                                                             |
|-------------------------------------------|----------------------------------------|-----------------------------------------------------------------------------------------------------------------------------------------------------------------------------------------------------------------------------------------------------------------------------------------------------------------------------------------------------------------------------------------------------------------------------------------------------------------------------------------------------------------------------------------------------------------------|-----------------------------------------------------------------------|---------------------------------------------------------------------------------------------------------------------------------------|
| <i>Satureja hortensis</i> L.              | Leaves & flowers, aerial parts, seeds. | Antinociceptive and anti-inflammatory effects were observed using the writhing test in the presence of EE= 2000 mg/kg, p.o. & AE= 200 mg/kg, p.o. As well as in the formalin test, EE= 500-2000 mg/kg, p.o., PF= 250-1000 mg/kg, p.o., & AE= 50-200 mg/kg, p.o. MP= 1000 mg/kg, p.o. & EO=200 mg/kg reduced edema induced by carrageenan. In the writhing test, EE produced 97% inhibition at 200 mg/kg, i.p., FP=87% inhibition at 200 mg/kg; & AE= 67% inhibition at 200 µL/kg, p.o. Whereas in the carrageenan-induced edema, EE=53% inhibition at 200 mg/kg, i.p. | Ethanol extract (EE), Polyphenolic fraction (PF). Essential oil (EO). | Hajhashemi et al., 2002; Hajhashemi et al., 2012.                                                                                     |
| <i>Satureja khuzistanica</i> Jamzad       | Aerial parts                           | Decreased IL-1 $\beta$ at 50-200 mg/kg, i.p., in the carrageenan-induced edema with a potent inhibition at 150 mg/kg, i.p. in Wistar rats.                                                                                                                                                                                                                                                                                                                                                                                                                            | Essential oil & ethanol extract.                                      | Amanlou et al., 2005; Abbasloo et al., 2016; Darabad et al., 2022.                                                                    |
| <i>Satureja montana</i> L.                | Aerial parts                           | A 60.37% inhibition of NO in a model of liver injury in Wistar rats.                                                                                                                                                                                                                                                                                                                                                                                                                                                                                                  | Methanol extract 50%.                                                 | Miguel et al., 2021; Milijasevic et al., 2022.                                                                                        |
| <i>Satureja sahendica</i> Bornm.          | Aerial parts & seeds.                  | Topical administration shortened the inflammatory phase, accelerated cellular proliferation, and increased fibroblast distribution per 1 mm <sup>2</sup> , collagen deposition, and rapid epithelialization in comparison with control animals. Using an infected wound, it reduces the risk of infection and improves the healing process by promoting the transition from inflammation to proliferation and increasing expression of IGF-1, FGF-2, VEGF, TGF- $\beta$ , and CXCL-1.                                                                                 | Essential oil                                                         | Salehi et al., 2018; Omarizadeh et al., 2021.                                                                                         |
| <i>Schizonepeta multifida</i> Briq.       | No identified                          | Greater than 50% inhibition of NO in mouse macrophages.                                                                                                                                                                                                                                                                                                                                                                                                                                                                                                               | No identified                                                         | Fushiya et al., 2000.                                                                                                                 |
| <i>Tetradenia riparia</i> (Hochst.) Codd. | Leaves & stem                          | Anti-inflammatory activity & NO attenuation in an <i>in vitro</i> assay.                                                                                                                                                                                                                                                                                                                                                                                                                                                                                              | Essential oil                                                         | Ghuman et al., 2019; Garzoli et al., 2022; Shimira, 2022.                                                                             |
| <i>Thymbra capitata</i> (L.) Cav.         | Aerial parts                           | Inhibition of the TNF- $\alpha$ at 20 µg/mL. Inhibition of the 5-LO in an <i>in vitro</i> assay. Anti-inflammatory activity in the carrageenan-induced edema model in Sprague-Dawley rats using 100 mg/kg, p.o.                                                                                                                                                                                                                                                                                                                                                       | Essential oil                                                         | Albano & Miguel, 2011<br>Aazza et al., 2016<br>Taşkın et al., 2018<br>Aazza et al., 2016; Albano et al., 2011; Carrasco et al., 2016; |

| Species                                       | Plant part(s)             | Pharmacology activity                                                                                                                                                                                                                                                                                                                                                                                                                                                                                                                                                                                                                                                                                                                                                                         | Extract(s)                       | Reference                                                                                            |
|-----------------------------------------------|---------------------------|-----------------------------------------------------------------------------------------------------------------------------------------------------------------------------------------------------------------------------------------------------------------------------------------------------------------------------------------------------------------------------------------------------------------------------------------------------------------------------------------------------------------------------------------------------------------------------------------------------------------------------------------------------------------------------------------------------------------------------------------------------------------------------------------------|----------------------------------|------------------------------------------------------------------------------------------------------|
|                                               |                           |                                                                                                                                                                                                                                                                                                                                                                                                                                                                                                                                                                                                                                                                                                                                                                                               |                                  | Llorent-Martínez et al., 2022; Miguel et al., 2021; Saoulajan et al., 2022; Tsioutsiou et al., 2022. |
| <i>Thymus albicans</i> Hoffmanns. & Link      | Flowering parts           | Inhibition of nitrites production by LPS-stimulated macrophages in a dose-dependent manner. A significant reduction by 27.16 and 41.32% was observed at the non-cytotoxic concentrations of 0.32 and 0.64 µL/mL, respectively.                                                                                                                                                                                                                                                                                                                                                                                                                                                                                                                                                                | Essential oil                    | Aazza et al., 2016; Roxo et al., 2020.                                                               |
| <i>Thymus armeniacus</i> Klovov & Des.-Shost. | Aerial parts              | Anti-inflammatory effect in tail immersion method in mice and acetic acid-induced nociception. Inhibits the activity of ASIC1a and ASIC3 isoforms. Participation of the lamiuside A & verbascoside in <i>in vitro</i> inhibition of calcineurin activity (IC <sub>50</sub> = 4.5 µM, 10.4 µM).                                                                                                                                                                                                                                                                                                                                                                                                                                                                                                | Essential oil                    | Modnicki et al., 2007; Prescott et al., 2011; Pargaien et al., 2020; Acimovic et al., 2022.          |
| <i>Thymus caespititius</i> Brot.              | Flowers, stems & leaves   | <i>T. caespititius</i> appears to have anti-inflammatory potential based on its promising inhibitory activity on NO production. Non-phenolic compounds have a major rol in this action. - <i>T. caespititius</i> & <i>T. capitata</i> Eos showed the best capacity for preventing lipid peroxidation & scavenging the free radicals. <i>T. capitata</i> and <i>T. caespititius</i> EOs were also the best samples for inhibiting lipoxigenase.                                                                                                                                                                                                                                                                                                                                                | Essential oil                    | Aazza et al., 2016; Alonso et al., 2017.                                                             |
| <i>Thymus camphoratus</i> Hoffmanns. & Link   | Aerial parts in flowering | The essential oil was more effective since a higher iNOS inhibition was achieved (72% vs 43.56%). Inhibition of COX-2 expression (40.93% vs 7.1%), probably through inhibition of the NFκB.                                                                                                                                                                                                                                                                                                                                                                                                                                                                                                                                                                                                   | Essential oil                    | Albano & Miguel, 2011; Zuzarte et al., 2018.                                                         |
| <i>Thymus carnosus</i> Boiss.                 | Aerial parts              | An immunostimulatory effect was observed in fish <i>Clarias batrachus</i> . Inhibition of the carrageenan-induced edema (100 and 300 mg/kg), and in the mechanical and cold hyperalgesia. Inhibition of the carrageenan induced pleurisy reducing the migration of total leukocytes in mice by 82% at 30 mg/kg. Camphor from the essential oil inhibited all articular parameters induced by zymosan in mice (knee edema, leukocyte infiltration, mechanical hyperalgesia and NO) at 30 mg/kg. Inhibited the carrageenan induced pleurisy reducing the migration of total leukocytes in mice by 83% at 15 mg/kg. Mixture of 1,8 cineole/limonene 1:1: from the essential oil inhibited the carrageenan induced pleurisy reducing the migration of total leukocytes in mice by 80% at 6 mg/kg. | Essential oil & aqueous extract. | Nahak and Kanta, 2014; dos Santos et al., 2021; de Lima et al., 2014.                                |

| Species                                   | Plant part(s)             | Pharmacology activity                                                                                                                                                                                                                                                                                                                                                                                                                                | Extract(s)                                                    | Reference                                                                  |
|-------------------------------------------|---------------------------|------------------------------------------------------------------------------------------------------------------------------------------------------------------------------------------------------------------------------------------------------------------------------------------------------------------------------------------------------------------------------------------------------------------------------------------------------|---------------------------------------------------------------|----------------------------------------------------------------------------|
| <i>Thymus citriodorus</i> (Pers.) Schreb. | Aerial parts              | NO inhibition in RAW 264.7 macrophages induced with LPS.                                                                                                                                                                                                                                                                                                                                                                                             | Essential oil                                                 | Oliveira et al., 2022.                                                     |
| <i>Thymus daenensis</i> Celak             | Aerial parts              | The herbal cream experimentally and histopathologically revealed a bum wound healing activity probably due to the antioxidant and anti-inflammatory activity of its phytochemical contents, especially phenolic compounds. <i>Thyme daenensis</i> extracts have antioxidant and anti-inflammatory properties and can improve liver injury in mice by decreasing pro-inflammatory TNF and IL-6 cytokines.                                             | Essential oil & methanol extract.                             | Akbarinia et al., 2008; Babaeizadeh et al., 2016; Soosani & Sazegar, 2018. |
| <i>Thymus herbabarona</i> Loisel.         | flowers, leaves and stems | <i>T. caespititius</i> has anti-inflammatory potential based on its promising inhibitory activity on NO production. <i>T. herba-barona</i> did not show anti-inflammatory potential since it was not able to inhibit the production of NO at concentrations without cytotoxicity to the cells. All the extracts revealed a high NO scavenging ability.                                                                                               | Crude extracts & phenolic fraction.                           | Zuzarte et al., 2013; Alfonso et al., 2017.                                |
| <i>Thymus kotschyanus</i> Boiss. & Hohen. | Leaves                    | Inhibition of the carrageenan-induced pleurisy in female Swiss mice at 30, 100, and 300 mg/kg.                                                                                                                                                                                                                                                                                                                                                       | Aqueous extract & essential oil.                              | Moraes et al., 2002; Piva et al., 2021.                                    |
| <i>Thymus linearis</i> Benth.             | Leaves & stems            | Extracts were examined for their anti-inflammatory activities against carrageenan induced paw edema. Aqueous, methanol, & n-hexane extracts have produced analgesic, anti-inflammatory, and antipyretic activities. Both oils and extracts also exhibited significant pharmacological activities as an antipyretic, analgesic, and anti-inflammatory compared to the standards paracetamol, indomethacin, and ibuprofen tested on Swiss albino mice. | Hexane, aqueous extract & methanolic extracts. Essential oil. | Chandra et al., 2016; Qadir et al., 2016.                                  |
| <i>Thymus longicaulis</i> C. Presl.       | No identified             | Extracts collected from different seasons exhibited a varying COX-2 gene expression inhibition in THP-1 macrophages.                                                                                                                                                                                                                                                                                                                                 | Hydroalcoholic extract                                        | Galasso et al., 2014.                                                      |
| <i>Thymus mastichina</i> L.               | Aerial parts              | Lipoxygenase inhibition with BE at IC <sub>50</sub> =30.5 µg/mL & EO at IC <sub>50</sub> 0.73 mg/mL. Reduction of the NO production in LPS-stimulated macrophages.                                                                                                                                                                                                                                                                                   | Butanol extract (BE) & essential oil (EO).                    | Albano & Miguel 2011; Aazza et al., 2016; Oliveira et al., 2023.           |
| <i>Thymus praecox</i> Opiz                | Aerial parts              | ME demonstrated anti-inflammatory effect with 22.69% in the altered edema size after the first hour of carrageenan injection compared to fraction methanol extract. ME inhibitory                                                                                                                                                                                                                                                                    | Petroleum ether extract,                                      | Cam et al., 2019; Taskin et al., 2019.                                     |

| Species                                            | Plant part(s) | Pharmacology activity                                                                                                                                                                                                                                                                              | Extract(s)                                                                           | Reference                                                                                       |
|----------------------------------------------------|---------------|----------------------------------------------------------------------------------------------------------------------------------------------------------------------------------------------------------------------------------------------------------------------------------------------------|--------------------------------------------------------------------------------------|-------------------------------------------------------------------------------------------------|
|                                                    |               | effect increased for four hours and reached maximum by 76.44% Antioxidant active compounds play an important role in anti-inflammatory activity. Treatment decreased the levels of proinflammatory cytokines such as TNF- $\alpha$ , IL-1 $\beta$ and IL-6.                                        | chloroform extract, & methanol extract (ME).                                         |                                                                                                 |
| <i>Thymus quinquecostatus</i> Celak                | No identified | The essential oil (20, 40, & 80 mg/kg) showed a dose-dependent analgesic effect. Ear edema was suppressed in a concentration-dependent manner when 60, 120, & 240 $\mu$ g/ear of thyme essential oil was administered through the ear edema test in mice.                                          | Essential oil                                                                        | Oh et al., 2008; Kim et al., 2022.                                                              |
| <i>Thymus pubescens</i> Boiss. & Kotschy ex Čelak. | Aerial parts  | Anti-inflammatory effect in the edema induced with carrageenan (66.9% inhibition at 400, i.p.) in Wistar rats.                                                                                                                                                                                     | Methanol extract                                                                     | Mahmoudi et al., 2008.                                                                          |
| <i>Thymus pulegioides</i> L.                       | Aerial parts  | Down-regulated NF-kB & simultaneously enhanced AP-1 activation in HepG2 cells.                                                                                                                                                                                                                     | Ethanol extract                                                                      | Stalinska et al., 2005; Pavel et al., 2011.                                                     |
| <i>Thymus serpyllum</i> L.                         | Aerial parts  | Decreases the inflammatory state in a murine model of obesity (50-150 mg/kg, p.o.) and reduces the IL-1 $\beta$ , IL-6, TNF- $\gamma$ in mouse models with irritable bowel syndrome induced with deoxycholic acid.                                                                                 | Aqueous extract, & standardized extract at 70%, & 15% arabic gum & 15% maltodextrin. | Raal et al., 2004; Ruiz-Malagón et al., 2022; Ruiz-Malagón et al., 2022b.                       |
| <i>Thymus sipyleus</i> Boiss.                      | No identified | Anti-inflammatory activity by suppressing the overproduction of TNF, NO, & 5-LOX inhibitory effect.                                                                                                                                                                                                | Methanol, ethanol, & hexane extracts.                                                | Günes et al., 2017; Demirci et al., 2018; Ustuner et al., 2019; Llorente-Martínez et al., 2022. |
| <i>Thymus vulgaris</i> L.                          | Aerial parts  | Increase antioxidant enzymes such as glutathione S-transferase & superoxide dismutase in rabbit models of renal and hepatic dysfunction. A 80% decrease in NO levels in murine models with inflammation. Anti-inflammatory effect in humans with cholestasis, chronic hepatitis, & liver fibrosis. | Essential oil                                                                        | Bacalbasa et al., 2022; Pandur et al., 2022.                                                    |

| Species                              | Plant part(s)         | Pharmacology activity                                                                                                                                                                                                                                                                                                          | Extract(s)                                                                      | Reference                                                                                                                  |
|--------------------------------------|-----------------------|--------------------------------------------------------------------------------------------------------------------------------------------------------------------------------------------------------------------------------------------------------------------------------------------------------------------------------|---------------------------------------------------------------------------------|----------------------------------------------------------------------------------------------------------------------------|
| <i>Zataria multiflora</i> Boiss.     | Aerial parts          | Improvement of the IL-8 levels and lymphocytes in guinea pig induced COPD models at 0.4-1.6 mg/mL, p.o. Enhanced levels of proinflammatory cytokines in guinea pig model of asthma at 0.2-08 mg/mL. Anti-inflammatory effects at 500-900 mL/kg, i.p. on edema induced in Wistar rats.                                          | Essential oil & ethanol extract.                                                | Khazdair et al., 2018; Ghorani et al., 2022.                                                                               |
| <i>Ziziphora clinopodioides</i> lam. | Aerial parts & leaves | Inhibition of proinflammatory cytokines in a mouse model of hemolytic anemia. Anti-inflammatory effect in a murine model of arteriosclerosis in Sprague-Dawley rats. Histamine induced edema. (50.41% inhibition at 500 mg/kg, i.p.). Decrease in the IL-4, IL-5, IL-10, & IFN- $\alpha$ in murine models of hemolytic anemia. | Aqueous extract-Fe-NPs, flavonoid fraction, methanol & aqueous extracts-Sn-NPs. | Chen et al., 2002; Shabbir et al., 2018; Ahmeda et al. 2020; Wu et al., 2020; Zhang et al., 2021; Ulikhanyan et al., 2022. |
| <i>Ziziphora tenuior</i> L.          | Aerial parts          | NO inhibition in RAW 264.7 macrophages induced with LPS. Decrease in apoptotic and inflammatory gene expression in the liver and lung. Improvement in functional and endocrine disturbances of estradiol valerate- induced polycystic ovary syndrome in rats and modulate the hormone level by anti-inflammatory effects.      | Essential oil & hydroalcoholic extract.                                         | Nabiuni et al., 2015; Abu-Darwish et al., 2016; Kianpour et al., 2021.                                                     |



|                                                     |                                                           |
|-----------------------------------------------------|-----------------------------------------------------------|
| ALT: Alanina aminotransferasa                       | TNF- $\alpha$ : Factor de necrosis celular alfa           |
| AP-1: factor de transcripción                       | VCAM-1: Molécula de adhesión celular vascular-1           |
| AST: Aspartato aminotransferasa                     | WBP: Proteína recombinante humana                         |
| BALF: Fluido broncoalveolar                         | $\alpha$ -SMA: Actina de músculo liso $\alpha$            |
| cAMP: Adenosín monofosfato cíclico                  | MMPS: Metaloproteinasas de la matriz extracelular:        |
| CD-1 et/et: Mutante alopecica de linea CD-1         | MPO: Mieloperoxidasa                                      |
| COX-2. Ciclooxygenasa 2                             | NF- $\kappa$ B p65: Factor nuclear $\kappa$ B p65         |
| DPPH: 2,2-difenil-1-picrilhidracilo                 | NF- $\kappa$ B: Factor nuclear kappa                      |
| FRAP: Capacidad de reducción férrica del plasma     | NO: Óxido nítrico                                         |
| GAE: Equivalente de ácido gálico                    | PANC-1C: Células cancerígenas pancreáticas humanas        |
| GSH: Glutación                                      | PBMCs: Celulas mononucleares de sangre periférica humanas |
| GSH-Px: Glutación peroxidasa                        | PCNA: Antígeno nuclear de células en proliferación        |
| HaCaT: Queratinocitos inmortalizados humanos        | PGE2: Prostaglandina E2                                   |
| HASMCs: Células aórticas de musculo liso humanas    | PI3K / Akt / mTOR: Ruta de señalización intracelular      |
| HepG2: Línea celular de cáncer de hígado humana     | PLA2: Phospholipasa A2                                    |
| IC <sub>50</sub> = Concentración inhibitoria máxima | PMA: Forbol-12-miristato-13-acetato                       |
| ICAM-1: Molécula de adhesión intercelular-1         | PPAR: Receptor activado por proliferador de peroxisomas   |
| IFN- $\gamma$ : Interferon gamma                    | RBL-2H3: Células de leucemia basófilas                    |
| IgE: Inmunoglobulina E                              | ROS: Especies reactivas de oxigeno                        |
| iNOS: Óxido nítrico sintasa                         | SC <sub>50</sub> = Actividad antioxidante                 |
| LPS: Lipopolisacárido                               | SOD: Super óxido dismutasa                                |
| MCP-1: Proteína quimioatrayente de monocitos1       | TGF- $\beta$ 1: factor de crecimiento tumoral- $\beta$ 1  |
| MDA: Malondialdehído                                | Thp-1: Línea celular monocitica de leucemia humana        |

- Aazza, S., El-Guendouz, S. & Miguel, M.G. (2016). Antioxidant, Anti-inflammatory and anti-hyperglycaemic activities of essential oils from *Thymbra capitata*, *Thymus albicans*, *Thymus caespititius*, *Thymus carnosus*, *Thymus lotocephalus* and *Thymus mastichina* from Portugal. *Natural Product Communications* 11(7). doi:10.1177/1934578X1601100739
- Abbasloo, E., Dehghan, F., Khaksari, M., Najafipour, H., Vahidi, R., Dabiri, S., Sepehri, G., & Asadikaram, G. (2016). The anti-inflammatory properties of *Satureja khuzistanica* Jamzad essential oil attenuate the effects of traumatic brain injuries in rats. *Scientific Reports*, 6, 31866. doi.org/10.1038/srep31866
- Abdolmaleki, A., Rajabi, A., Sanginabadi, F. (2013). Evaluation of the analgesic and anti-inflammatory effects of aqueous extract of peppermint (*Mentha piperita*). *Scientific Journal of Kurdistan University of Medical Sciences* 18(1), 67-74.
- Abu-Darwish, M. S., Cabral, C., Ali, Z., Wang, M., Khan, S. I., Jacob, M. R., Efferth, T. (2020). *Salvia ceratophylla* L. from south of Jordan: New insights on chemical composition and biological activities. *Natural Products and Bioprospecting*, 10(5), 307-316. doi:10.1007/s13659-020-00259-9.
- Acero, N., Ortega, T., Villagrasa, V., Leon, G., Muñoz-Mingarro, D., Castillo, E., González-Rosende, M.E., Borrás, S., Rios, J.L., Bosch-Morell, F., Martínez-Solís, I. (2023). Phytotherapeutic alternatives for neurodegenerative dementias: Scientific review, discussion and therapeutic proposal. *Phytotherapy Research*, 37, 1176–1211. doi:10.1002/ptr.7727.
- Aćimović, M., Šeregelj, V., Simić, K., Varga, A., Pezo, L., Vulić, J., & Čabarkapa, I. (2022). Chemical profile of *Nepeta cataria* l. var. *citriodora* (becker) essential oil and in vitro evaluation of biological activities. *Acta Scientiarum Polonorum, Hortorum Cultus*, 21(4), 67–74. https://doi.org/10.24326/asphc.2022.4.7
- Adriana Estrella, G. R., María Eva, G. T., Alberto, H. L., María Guadalupe, V. D., Azucena, C. V., Sandra, O. S., Noé, A. V., & Francisco Javier, L. M. (2021). Limonene from *Agastache mexicana* essential oil produces antinociceptive effects, gastrointestinal protection and improves experimental ulcerative colitis. *Journal of Ethnopharmacology*, 280. https://doi.org/10.1016/j.jep.2021.114462.
- Afonso AF, Pereira OR, Fernandes ÂSF, Calhelha RC, Silva AMS, Ferreira ICFR, Cardoso SM. (2019b). The health-benefits and phytochemical profile of *Salvia apiana* and *Salvia farinacea* var. *victoria* Blue decoctions. *Antioxidants (Basel)* 8(8):241. https://doi: 10.3390/antiox8080241. PMID: 31349575; PMCID: PMC6721217.
- Afonso AF, Pereira OR, Neto RT, Silva AMS, Cardoso SM. (2017). Health-Promoting Effects of *Thymus herba-barona*, *Thymus pseudolanuginosus*, and *Thymus caespititius* Decoctions. *International Journal of Molecular Sciences* 2017, 18, 1879. doi:10.3390/ijms18091879 .
- Afonso, A. F., Pereira, O. R., Fernandes, Â., Calhelha, R. C., Silva, A. M. S., Ferreira, I. C. F., & Cardoso, S. M. (2019a). Phytochemical composition and bioactive effects of *Salvia africana*, *Salvia officinalis* 'icterina' and *Salvia mexicana* aqueous extracts. *Molecules*, 24(23) doi:10.3390/molecules24234327

- Ahmad, F., Kamaraj, B., Mohamed, J.M.M., El-Sagheer, A.M., Emam, A.S.A. (2022). Ethnopharmacological and phytochemical study of major species from Labiatae family in Saudi Arabia: A Systematic Review. *International Journal of Applied Pharmaceutics*, 14 (ThematicSpecial Issue), pp. 44–57. DOI: <https://dx.doi.org/10.22159/ijap.2022.v14ti.40>
- Ahmed, M.E.O., Abdelgadir, A.A., Ahmed, E.M. (2021). Traditional use of medicinal plants in Central Sudan Arabian. *Journal of Medicinal and Aromatic Plants*, 7(1), pp. 29–73. DOI: 10.48347/IMIST.PRSM/ajmap-v7i1.22273
- Ahmeda, A., Mahdavi, B., Zaker, F., Kaviani, S., Hosseini, S., Zangeneh, M. M., Zangeneh, A., Paydarfar, S., & Moradi, R. (2020). Chemical characterization and anti-hemolytic anemia potentials of tin nanoparticles synthesized by a green approach for bioremediation applications. *Applied Organometallic Chemistry*, 34(3) e5433. doi.org/10.1002/aoc.5433
- Aihaiti, K., Li, J., Xu, N.-N., Tang, D., Aisa, H.A. (2023). Monoterpenoid derivatives from *Hyssopus cuspidatus* Boriss. and their bioactivities. *Fitoterapia*, 165, 105432. <https://doi.org/10.1016/j.fitote.2023.105432>
- Akbarinia, A., Sharifi-Ashabadi, A., Sefidkon, F. (2008). Influence of harvest dynamics on herb and oil yield of *Thymus kotschyanus* and *Thymus daenensis* cultivated at two sites. *Acta Horticulturae*, 786, pp. 229–234. Doi: 10.17660/ActaHortic.2008.786.25
- Akkol, E. K., Göger, F., Koşar, M., & Başer, K. H. C. (2008). Phenolic composition and biological activities of *Salvia halophila* and *Salvia virgata* from Turkey. *Food Chemistry*, 108(3), 942–949. doi.org/10.1016/j.foodchem.2007.11.071
- Akram, M., Syed, A. S., Kim, K. A., Lee, J. S., Chang, S. Y., Kim, C. Y., & Bae, O. N. (2015). Heme oxygenase 1-mediated novel anti-inflammatory activities of *Salvia plebeia* and its active components. *Journal of Ethnopharmacology*, 174, 322–330. doi.org/10.1016/j.jep.2015.08.028
- Aladedunye, F. A., Okorie, D. A., & Ighodaro, O. M. (2008). Anti-inflammatory and antioxidant activities and constituents of *Platostoma africanum* P. Beauv. *Natural Product Research*, 22(12), 1067–1073. doi.org/10.1080/14786410802264004
- Albano, S. M., & Miguel, M. G. (2011). Biological activities of extracts of plants grown in Portugal. *Industrial Crops and Products*, 33(2), 338–343. doi:10.1016/j.indcrop.2010.11.012
- Algieri, F., Rodriguez-Nogales, A., Vezza, T., ...Rodriguez-Cabezas, M.E., Galvez, J. (2016). Anti-inflammatory activity of hydroalcoholic extracts of *Lavandula dentata* L. and *Lavandula stoechas* L. *Journal of Ethnopharmacology*, 190, pp. 142–158. <https://doi.org/10.1016/j.jep.2016.05.063>
- Ali, T., Javan, M., Sonboli, A., & Semnanian, S. (2012). Antinociceptive and anti-inflammatory activities of the essential oil of *Nepeta crispa* Willd. in experimental rat models. *Natural Product Research*, 26(16), 1529–1534. doi.org/10.1080/14786419.2011.565284

- Ali-Shtayeh, M.S., Abu-Zaitoun, S.Y., Dudai, N., Jamous, R.M. (2020). Downy lavender oil: a promising source of antimicrobial, antiobesity, and anti-Alzheimer's disease agents. *Evidence-Based Complementary and Alternative Medicine*, 2020, 5679408. doi: 10.1155/2020/5679408.
- Aljohani, A. S. M., Alhumaydhi, F., Rauf, A., Hamad, E., & Rashid, U. (2022). *In Vivo* and *In Vitro* Biological Evaluation and Molecular Docking Studies of Compounds Isolated from *Micromeria biflora* (Buch. Ham. ex D.Don) Benth. *Molecules*, 27(11), 3377. doi.org/10.3390/molecules27113377
- Almeida-Bezerra, J. W., Rodrigues, F. C., Lima Bezerra, J. J., Vieira Pinheiro, A. A., Almeida De Menezes, S., Tavares, A. B., Costa, A. R., Augusta De Sousa Fernandes, P., Bezerra Da Silva, V., Martins Da Costa, J. G., Pereira Da Cruz, R., Bezerra Moraes-Braga, M. F., Melo Coutinho, H. D., Teixeira De Albergaria, E., Meiado, M. V., Siyadatpanah, A., Kim, B., & Moraes De Oliveira, A. F. (2022). Traditional Uses, Phytochemistry, and Bioactivities of *Mesosphaerum suaveolens* (L.) Kuntze. In *Evidence-based Complementary and Alternative Medicine*, 1-23 doi.org/10.1155/2022/3829180
- Al-Mijalli, S. H., Mrabti, N. N., Ouassou, H., Sheikh, R. A., Assaggaf, H., Bakrim, S., Abdallah, E. M., Alshahrani, M. M., Al Awadh, A. A., Lee, L. H., AlDhaheri, Y., Sahebkar, A., Zengin, G., Attar, A. A., Bouyahya, A., & Mrabti, H. N. (2022). Chemical Composition and Antioxidant, Antimicrobial, and Anti-Inflammatory Properties of *Origanum compactum* Benth Essential Oils from Two Regions: In Vitro and In Vivo Evidence and In Silico Molecular Investigations. *Molecules*, 27(21). https://doi.org/10.3390/molecules27217329
- Alonazi M.A., Jemel I., Moubayed N., Alwhibi M., El-Sayed N.N.E., Ben Bacha A. (2021). Evaluation of the *in vitro* anti-inflammatory and cytotoxic potential of ethanolic and aqueous extracts of *Origanum syriacum* and *Salvia lanigera* leaves. *Environmental Science and Pollution Research* 28(16):19890-19900. https://doi: 10.1007/s11356-020-11961-z.
- Al-Taweela, A.M., Raish, M., Perveen, S., Fawzy, G.H., Ahmad, A., Ansari, M.A., Mudassarg, S., Ganaie, M.A. (2017). *Nepeta deflersiana* attenuates isoproterenol-induced myocardial injuries in rats: Possible involvement of oxidative stress, apoptosis, inflammation through nuclear factor (NF)-κB downregulation. *Phytomedicine*, 34, 67–75. doi: http://dx.doi.org/10.1016/j.phymed.2017.08.003
- Álvarez-Santos, N., Estrella-Parra, E. A., Benítez-Flores, J. del C., Serrano-Parras, R., Villamar-Duque, T. E., Santiago-Santiago, M. A., González-Valle, M. del R., Avila-Acevedo, J. G., & García-Bores, A. M. (2022). *Asterohyptis stellulata*: Phytochemistry and wound healing activity. *Food Bioscience*, 50, 102150. doi.org/10.1016/j.fbio.2022.102150
- Alves-Silva, J.M., Pedreiro, S., Cavaleiro, C., Figueirinha, A., Salgueiro, L. (2023). Effect of *Thymbra capitata* (L.) Cav. on Inflammation, Senescence and Cell Migration. *Nutrients*, 15(8), 1930. https://doi.org/10.3390/nu15081930
- Alves-Soares, R., de Oliveira, H.D., Campos, D.D.C.O., Leal-Cardoso, J.H., Coelho-de-Souza, A.N. (2022). The Essential Oil of *Hyptis crenata* Inhibits the Increase in Secretion of Inflammatory Mediators. *Plants*, 11(22), 3048. https://doi.org/10.3390/plants11223048

- Al-Yousuf, M. H., Bashir, A. K., Ali, B. H., Tanira, M. O. M., & Blunden, G. (2002). Some effects of *Salvia aegyptiaca* L. on the central nervous system in mice. *Journal of Ethnopharmacology*, 81, 121–127. [www.elsevier.com/locate/jethpharm](http://www.elsevier.com/locate/jethpharm)
- Alzweiri, M., Sarhan, A.A., Mansi, K., Hudaib, M., Aburjai, T. (2011). Ethnopharmacological survey of medicinal herbs in Jordan, the Northern Badia region. *Journal of Ethnopharmacology*, 137(1), pp. 27–35. [https://doi.org/10.1016/S0378-8741\(02\)00057-0](https://doi.org/10.1016/S0378-8741(02)00057-0)
- Amanlou, M., Dadkhah, F., Farsam, H., Salehnia, A., & Dehpour, A. R. (2005). An anti-inflammatory and anti-nociceptive effect of hydroalcoholic extract of *Satureja khuzistanica* Jamzad extract. *Journal Pharmacology and Pharmaceutics Science*, 8(1), 102–106. [www.cspscanada.org](http://www.cspscanada.org)
- Aminian, A. R., Mohebbati, R., & Boskabady, M. H. (2022). The Effect of *Ocimum basilicum* L. and Its Main Ingredients on Respiratory Disorders: An Experimental, Preclinical, and Clinical Review. *Frontiers in Pharmacology* 12 805391. [doi.org/10.3389/fphar.2021.805391](https://doi.org/10.3389/fphar.2021.805391)
- Amira, S., Dade, M., Schinella, G., & Rios, J.-L. (2012). Anti-inflammatory, anti-oxidant, and apoptotic activities of four plant species used in folk medicine in the Mediterranean basin T cell leukemia control via Ras-Raf pathway inhibition with peptides View project Mediterranean Plants for Skin Inflammation and Psoriasis View project. *Article in Pakistan Journal of Pharmaceutical Sciences*. [www.researchgate.net/publication/51879323](http://www.researchgate.net/publication/51879323)
- Amirova, K.M., Dimitrova, P., Marchev, A.S., Aneva, I.Y., Georgiev, M.I. (2019). *Clinopodium vulgare* L. (wild basil) extract and its active constituents modulate cyclooxygenase-2 expression in neutrophils. *Food and Chemical Toxicology*, 124, pp. 1–9. <https://doi.org/10.1016/j.fct.2018.11.054>
- An, H. J., Jeong, H. J., Um, J. Y., Kim, H. M., & Hong, S. H. (2006). *Glechoma hederacea* inhibits inflammatory mediator release in IFN- $\gamma$  and LPS-stimulated mouse peritoneal macrophages. *Journal of Ethnopharmacology*, 106(3), 418–424. [doi.org/10.1016/j.jep.2006.01.024](https://doi.org/10.1016/j.jep.2006.01.024)
- Andrade, J. M., Custódio, L., Romagnoli, A., Reis, C. P., Rodrigues, M. J., Garcia, C., Petruccioli, E., Goletti, D., Faustino, C., Fimia, G. M., & Rijo, P. (2018). Antitubercular and anti-inflammatory properties screening of natural products from *Plectranthus* species. *Future medicinal chemistry*, 10(14), 1677–1691. <https://doi.org/10.4155/fmc-2018-0043>
- Andreyeva, A.A., Sivtseva, V.V., Pashayeva, A.T., Chirikova, N.D., Okhlopkova, Z.M., Kim, S.W., Huseynova, I.M., Zulfugarov, I.S. (2020). Dragonhead as a model plant for biotechnology of biologically active compounds. *Azerbaijan Pharmaceutical and Pharmacotherapy Journal*, 1, 31-35.
- Anjos, K. S. D., Araújo-Filho, H. G., Duarte, M. C., Costa, V. C. O., Tavares, J. F., Silva, M. S., Almeida, J. R. G. S., Souza, N. A. C., Rolim, L. A., Menezes, I. R. A., Coutinho, H. D. M., Quintans, J. S. S., & Quintans-Júnior, L. J. (2017). HPLC-dad analysis, antinociceptive and anti-inflammatory properties of the ethanolic extract of *Hyptis umbrosa* in mice. *EXCLI Journal*, 16, 14–24. [doi.org/10.17179/excli2016-698](https://doi.org/10.17179/excli2016-698)

- Antão, A.R., Bangay, G., Domínguez-Martín, E.M., Díaz-Lanza, A.M., Ríjo, P. (2021). *Plectranthus ecklonii* Benth: A comprehensive review into its phytochemistry and exerted biological activities. *Frontiers in Pharmacology*, 12, 768268. doi: 10.3389/fphar.2021.768268.
- Arenas-Chavez, C.A., Wiche-Salinas, T., Valencia-Mercado, I., Calle-Valdez, R., Vera-Gonzales, C., Malaga-Contreras, S., Huanqui-Guerra, C. (2018). Efecto antiinflamatorio de la fracción flavonoide de *Lepechinia meyenii* (Walp.) Epling (*Salvia*) sobre leucocitos de pacientes con artritis reumatoide. *Revista Peruana de Medicina Experimental y Salud Pública*, 35(1), 55-61 doi: 10.17843/rpmesp.2018.351.3600.
- Asadollahi, M., Firuzi, O., Heidary Jamebozorgi, F., Alizadeh, M., & Jassbi, A. R. (2019). Ethnopharmacological studies, chemical composition, antibacterial and cytotoxic activities of essential oils of eleven *Salvia* in Iran. *Journal of Herbal Medicine*, 17-18 doi:10.1016/j.hermed.2018.11.006
- Azevedo, M.-M., Pinheiro, C., Dias, A.C.P., Pinto-Ribeiro, F., Baltazar, F. (2015). Impact of an educational hands-on project on the antimicrobial, antitumor and anti-inflammatory properties of plants on portuguese students' awareness, knowledge, and competences. *International Journal of Environmental Research and Public Health*, 12(3), pp. 2437–2453. <https://doi.org/10.3390/ijerph120302437>
- Bacalbasa, N., Balescu, I., Stoica, C., Pop, L., Varlas, V., Martac, C., Voichitoiu, A., & Gaspar, B. (2022). The anti-inflammatory, anti-infectious and anti-cancerous effects of *Thymus vulgaris*. *Romanian Journal of Medical Practice*, 17, 21–23. doi.org/10.37897/RJMP. 2022.S3.6
- Bakhtiarian, A., Aarabi Moghaddam, F., Zamani, M.M., Farahanikia, B., Khanavi, M. (2011). Anti-inflammatory effect of *Thymus kotschyanus* Boiss. & Hohen. extract on rat's hind paw edema induced by carrageenan. *Journal of Medicinal Plants*, 10(37), pp. 25–32.
- Banerjee, P., Kumar, T., Sarangi, S. C., Meetei, U. D., Devi, A. S., & Kumar, R. (2021). Anti-inflammatory potential of aqueous extract of *Elsoltzia stachyodes* on experimental models of inflammation in rats. *Journal of Natural Science, Biology and Medicine*, 12(1), 103–108. doi.org/10.4103/jnsbm.JNSBM\_5\_20
- Banno, N., Akihisa, T., Tokuda, H., Yasukawa, K., Higashihara, H., Ukiya, M., Watanabe, K., Kimura, Y., Hasegawa, J.-I., & Nishino, H. (2004). Triterpene Acids from the Leaves of *Perilla frutescens* and Their Anti-inflammatory and Antitumor-promoting Effects. *Bioscience, Biotechnology and Biochemistry*, 68(1), 85–90.
- Batista, D., Falé, P. L., Serralheiro, M. L., Araújo, M. E., Dias, C., Branco, I., Grosso, C., Coelho, J., Palavra, A., Madeira, P. J. A., Martins, A., & Rauter, A. P. (2017). Phytochemical Characterization and Biological Evaluation of the Aqueous and Supercritical Fluid Extracts from *Salvia sclareoides* Brot. *Open Chemistry*, 15(1), 82–91. doi.org/10.1515/chem-2017-0011
- Bayat, M., Kalantar, K., & Amirghofran, Z. (2019). Inhibition of interferon- $\gamma$  production and T-bet expression by menthol treatment of human peripheral blood mononuclear cells. *Immunopharmacology and Immunotoxicology*, 41(2), 267–276. doi.org/10.1080/08923973.2019.1588294

- Becker, K., Schwaiger, S., Waltenberger, B., Fuchs, D., Pezzei, C. K., Schennach, H., Stuppner, H., & Gostner, J. M. (2018). Immunomodulatory Effects of Diterpene Quinone Derivatives from the Roots of *Horminum pyrenaicum* in Human PBMC. *Oxidative Medicine and Cellular Longevity*, 2018. doi.org/10.1155/2018/2980295
- Belozerova, O.A.; Osmakov, D.I.; Vladimirov, A.; Koshelev, S.G.; Chugunov, A.O.; Andreev, Y.A.; Palikov, V.A.; Palikova, Y.A.; Shaykhutdinova, E.R.; Gvozdz, A.N.; et al. (2020). Sevanol and Its Analogues: Chemical Synthesis, Biological Effects and Molecular Docking. *Pharmaceuticals*, 13, 163. https://doi.org/10.3390/ph13080163
- Benrezzouk, R., Terencio, M. C., Ferrandiz, M. L., Hernandez-Perez, M., Rabanal, R., & Alcaraz, M. J. (2001). Inhibition of 5-lipoxygenase activity by the natural anti-inflammatory compound aethiopinone. *Inflammation Research*, 50(2), 96-101. doi:10.1007/s000110050730.
- Beserra-Filho, J.I.A., de Macêdo, A.M., Leão, A.H.F.F., Bispo, J.M.M., Santos, J.R., de Oliveira-Melo, A.J., Passos Menezes, P.D., Duarte, M.C., de Souza Araújo, A.A., Silva, R.H., Quintans-Júnior, L.J., Ribeiro, A.M. (2019). *Eplingiella fruticosa* leaf essential oil complexed with  $\beta$ -cyclodextrin produces a superior neuroprotective and behavioral profile in a mice model of Parkinson's disease. *Food and Chemical Toxicology*, 124, 17–29. https://doi.org/10.1016/j.fct.2018.11.056.
- Bhardwaj, S., & Bhatia, S. (2020). Development and characterization of niosomal gel system using *Lallementia royaleana* Benth. mucilage for the treatment of rheumatoid arthritis. *Iranian Journal of Pharmaceutical Research: IJPR*, 19(3), 465–482. doi.org/10.22037/ijpr.2020.112887.14003
- Bian, J., Wang, K., Wang, Q., Wang, P., Wang, T., Shi, W., Ruan, Q. (2020). *Dracocephalum heterophyllum* (DH) exhibits potent anti-proliferative effects on autoreactive CD4+ T cells and ameliorates the development of experimental autoimmune uveitis. *Frontiers in Immunology*, 11:575669. doi: 10.3389/fimmu.2020.575669
- Bian, M., Zhang, Y., Du, X., Xu, J., Cui, J., Gu, J., Zhu, W., Zhang, T., & Chen, Y. (2017). Apigenin-7-diglucuronide protects retinas against bright light-induced photoreceptor degeneration through the inhibition of retinal oxidative stress and inflammation. *Brain Research*, 1663, 141–150. doi.org/10.1016/j.brainres.2017.03.019
- Bonesi, M., Loizzo, M. R., Acquaviva, R., Malfa, G. A., Aiello, F., & Tundis, R. (2017). Anti-inflammatory and antioxidant agents from *Salvia* genus (Lamiaceae): An assessment of the current state of knowledge. *Anti-Inflammatory and Anti-Allergy Agents in Medicinal Chemistry*, 16(2), 70-86. doi:10.2174/1871523016666170502121419
- Borges, R. S., Ortiz, B. L. S., Pereira, A. C. M., Keita, H., & Carvalho, J. C. T. (2019). *Rosmarinus officinalis* essential oil: A review of its phytochemistry, anti-inflammatory activity, and mechanisms of action involved. *Journal of Ethnopharmacology* (Vol. 229, pp. 29–45). Elsevier Ireland Ltd. https://doi.org/10.1016/j.jep.2018.09.038
- Boukhary, R., Raafat, K., Ghoneim, A. I., Aboul-Ela, M., & El-Lakany, A. (2016). Anti-Inflammatory and Antioxidant Activities of *Salvia fruticosa*: An HPLC Determination of Phenolic Contents. *Evidence-Based Complementary and Alternative Medicine*, 2016. doi.org/10.1155/2016/7178105

- Bounihi, A., Hajjaj, G., Alnamer, R., Cherrah, Y., & Zellou, A. (2013). In vivo potential anti-inflammatory activity of *Melissa officinalis* l. essential oil. *Advances in Pharmacological Sciences*, 2013. doi.org/10.1155/2013/101759
- Bouyahya, A., Chamkhi, I., Menyiy, N.E., Simal-Gandara, J., El Omari, N. (2023). Traditional use, phytochemistry, toxicology, and pharmacological properties of *Lavandula dentata* L.: A comprehensive review. *South African Journal of Botany*, 154, pp. 67–87.
- Brahmi, F., Nury, T., Debbabi, M., Hadj-Ahmed, S., Zarrouk, A., Prost, M., Madani, K., Boulekbache-Makhlouf, L., & Lizard, G. (2018). Evaluation of antioxidant, anti-inflammatory and cytoprotective properties of ethanolic mint extracts from Algeria on 7-ketocholesterol-treated murine RAW 264.7 macrophages. *Antioxidants*, 7(12), 1-15. doi.org/10.3390/antiox7120184
- Burk, D.R., Senechal-Willis, P., Lopez, L.C., Hogue, B.G., Daskalova, S.M. (2009). Suppression of lipopolysaccharide-induced inflammatory responses in RAW 264.7 murine macrophages by aqueous extract of *Clinopodium vulgare* L. (Lamiaceae). *Journal of Ethnopharmacology*, 2009, 126(3), pp. 397–405.
- Cai, X., Mao, Y., Shen, X., ...He, J., Zhang, M. (2023). The extract from *Hyssopus cuspidatus* Boriss. Prevents bronchial airway remodeling by inhibiting mouse bronchial wall thickening and hASMC proliferation and migration. *Journal of Ethnopharmacology*, 2023, 303, 116047.
- Calvo, M.I., Cavero, R.Y. (2015). Medicinal plants used for neurological and mental disorders in Navarra and their validation from official sources. *Journal of Ethnopharmacology*, 169, pp. 263–268.
- Cam ME, Hazar-Yavuz AN, Yildiz S, Ertas B, Ayaz Adakul B, Taskin T, Alan S, Kabasakal L. (2019). The methanolic extract of *Thymus praecox* subsp. *skorpilii* var. *skorpilii* restores glucose homeostasis, ameliorates insulin resistance and improves pancreatic  $\beta$ -cell function on streptozotocin/nicotinamide-induced type 2 diabetic rats. *Journal of Ethnopharmacology* 231 (2019) 29–38. https://doi.org/10.1016/j.jep.2018.10.028.
- Carbone C, Martins-Gomes C, Caddeo C, Silva AM, Musumeci T, Pignatello R, Puglisi G, Souto EB. (2018). Mediterranean essential oils as precious matrix components and active T ingredients of lipid nanoparticles. *International Journal of Pharmaceutics* 548 (2018) 217–226. doi.org/10.1016/j.ijpharm.2018.06.064
- Cardia, G. F. E., Silva-Filho, S. E., Silva, E. L., Uchida, N. S., Cavalcante, H. A. O., Cassarotti, L. L., Salvadego, V. E. C., Spironello, R. A., Bersani-Amado, C. A., & Cuman, R. K. N. (2018). Effect of Lavender (*Lavandula angustifolia*) Essential Oil on Acute Inflammatory Response. *Evidence-Based Complementary and Alternative Medicine*, 2018. doi.org/10.1155/2018/1413940.
- Cariddi, L. N., González-Pereyra, M. L., Gambero, M. L., Demo, M. S., Isola, M. C., Franzoni, L., Sabini, L. I., & Maldonado, A. M. (2006). *Minthostachys verticillata* (Griseb.) Epling: A South American plant with antiinflammatory effect in vitro. *Allergy and Clinical Immunology International*, 18(6), 234–241. https://doi.org/10.1027/0838-1925.18.6.234.



- Carrasco, A., Martinez-Gutierrez, R., Tomas, V., Tudela, J. (2015). *Lavandula angustifolia* and *Lavandula latifolia* Essential Oils from Spain: Aromatic Profile and Bioactivities. *Planta Medica*, 82(1-2), pp. 163–170.
- Carrasco, A., Perez, E., Cutillas, A. -, Martinez-Gutierrez, R., Tomas, V., & Tudela, J. (2016). *Origanum vulgare* and *Thymbra capitata* essential oils from spain: Determination of aromatic profile and bioactivities. *Natural Product Communications*, 11(1), 113-120. doi:10.1177/1934578x1601100133
- Castro, J.P., Franco, L.A., Diaz, F. (2021). Anti-inflammatory screening of plant species from the Colombian Caribbean Coast. *Journal of Applied Pharmaceutical Science*, 11(4), 106-117. doi: 10.7324/JAPS.2021.110413.
- Ceschel, G. C., Maffei, P., Moretti, M. D. L., Demontis, S., & Peana, A. T. (2000). *In vitro* permeation through porcine buccal mucosa of *Salvia desoleana* atzei and picci essential oil from topical formulations. *International Journal of Pharmaceutics*, 195(1-2), 171-177. doi:10.1016/S0378-5173(99)00381-6
- Chan, H. H., Hwang, T. L., Su, C. R., Reddy, M. V. B., & Wu, T. S. (2011). Anti-inflammatory, anticholinesterase and antioxidative constituents from the roots and the leaves of *Salvia nipponica* Miq. var. *formosana*. *Phytomedicine*, 18(2–3), 148–150. doi.org/10.1016/j.phymed.2010.06.017
- Chang, C. T., Soo, W. N., Chen, Y. H., & Shyur, L. F. (2019). Essential Oil of *Mentha aquatica* var. *Kenting* water mint suppresses two-stage skin carcinogenesis accelerated by BRAF inhibitor vemurafenib. *Molecules*, 24(12). https://doi.org/10.3390/molecules24122344
- Chen, J., Wang, J. B., Yu, C. H., Chen, L. Q., Xu, P., & Yu, W. Y. (2013). Total flavonoids of *Mosla scabra* leaves attenuates lipopolysaccharide-induced acute lung injury via down-regulation of inflammatory signaling in mice. *Journal of ethnopharmacology*, 148(3), 835–841. doi.org/10.1016/j.jep.2013.05.020
- Chen, S., Fang, A., Zhong, Y., & Tang, J. (2022). *Ziziphora clinopodioides* Lam leaf aqueous extract mediated novel green synthesis of iron nanoparticles and its anti-hemolytic anemia potential: A chemobiological study. *Arabian Journal of Chemistry*, 15(3), 103561. doi.org/10.1016/j.arabjc.2021.103561
- Chen, X., Zhang, L., Qian, C., Du, Z., Xu, P., & Xiang, Z. (2020). Chemical compositions of essential oil extracted from *Lavandula angustifolia* and its prevention of TPA-induced inflammation. *Microchemical Journal*, 153. doi.org/10.1016/j.microc.2019.104458
- Cheng, E., Chi, J., Li, Y. X., Zhang, W. J., Huang, N., Wang, Z. M., Dai, L. P., & Xu, E. P. (2022). Diverse ent-kaurane diterpenoids from *Isodon henryi*. *Tetrahedron Letters*, 108. doi.org/10.1016/j.tetlet.2022.154119

Chirikova, N.K., Nokhsorov V.V., Nikolaev, W.M. (2021). Ethnopharmacological research of plant resources of central.

- Choia, H., Kim, T., Kim, S.-H., & Kim, J. (2016). Anti-allergic inflammatory triterpenoids isolated from the spikes of *Prunella vulgaris*. *Natural Product Communications*, 11(1), 2–31.
- Chou, S., Lai, C. Lai, C., Chao, W. (2018). Chemical composition, antioxidant, anti-melanogenic and anti-inflammatory activities o *Glechoma hederacea* (Lamiaceae) essential oil. *Industrial Crops and Products* 122, 675-685. doi.org/10.1016/j.indcrop.2018.06.032.
- Choudhary, M.I., Siddiqui, Z.A., Nawaz, S.A., Atta-ur-Rahman. (2006). Microbial transformation and butyrylcholinesterase inhibitory activity of (-)-caryophyllene oxide and its derivatives. *Journal of Natural Products*, 69(10), pp. 1429–1434.
- Cigremis, Y., Ulukanli, Z., Ilcim, A., Akgoz, M. (2010). In vitro antioxidant and antimicrobial assays of acetone extracts from *Nepeta meyeri* Benth. *European Review for Medical and Pharmacological Sciences*, 14, 661–668.
- Coelho MN, Soares PAG, Frattani FS, Camargo LMM, Tovar AMF, de Aguiar PF, Zingali RB, Mourão PAS, Costa SS. Polysaccharide composition of an anticoagulant fraction from the aqueous extract of *Marsypianthes chamaedrys* (Lamiaceae). *International Journal of Biological Macromolecules* 145 (2020) 668–681. doi.org/10.1016/j.ijbiomac.2019.12.176 0141-8130/.
- Coelho-De-souza, A.N., Alves-Soares, R., Oliveira, H.D., Guimarães-Pereira, J., Leal-Cardoso, J.H. (2021). The essential oil of *Hyptis crenata* Pohl ex Benth. Presents an antiedematogenic effect in mice. *Brazilian Journal of Medical and Biological Research*, 54(3), pp. 1–9, e9422
- Contreras, M.D.M., Algieri, F., Rodriguez-Nogales, A., Gálvez, J., Segura-Carretero, A. (2018). Phytochemical profiling of anti-inflammatory *Lavandula* extracts via RP–HPLC–DAD–QTOF–MS and –MS/MS: Assessment of their qualitative and quantitative differences. *Electrophoresis*, 2018, 39(9-10), pp. 1284–1293.
- Côté, H., Pichette, A., St-Gelais, A., Legault, J. (2021). The biological activity of *Monarda didyma* L. essential oil and its effect as a diet supplement in mice and broiler chicken. *Molecules*, 26, 3368. doi: https://doi.org/10.3390/molecules26113368.
- Dadkhah, A., Fatemi, F., Rasooli, A., Malayeri, M. R. M., & Torabi, F. (2018). Assessing the effect of *Mentha longifolia* essential oils on cox-2 expression in animal model of sepsis induced by caecal ligation and puncture. *Pharmaceutical Biology*, 56(1), 495–504. doi.org/10.1080/13880209.2018.1510972
- Dal Piaz F., Imparato S., Lepore L., Bader A., De Tommasi N. 2010. A fast and efficient LC-MS/MS method for detection, identification and quantitative analysis of bioactive sesterterpenes in *Salvia dominica* crude extracts. *Journal Pharmaceutical Biomedical Analysis* 51(1):70-77. https://10.1016/j.jpba.2009.08.006.
- Darabad, A., Rahimi, M., Rafati, H. (2022). Continuous hydrodistillation-ultrasonication flow batch-mode operation system to enhance essential oil extraction from *Satureja khuzistanica* and evaluation of in vitro anti-inflammatory activity. *Industrial Crops and Products* 188(A), 115540. doi.org/10.1016/j.indcrop.2022.115540

- De Felice A., Bader A., Leone A., Sosa S., Loggia R.D., Tubaro A., De Tommasi N. 2006. New polyhydroxylated triterpenes and anti-inflammatory activity of *Salvia hierosolymitana*. *Planta Medica* 72(7):643-649. [https://doi: 10.1055/s-2006-931573](https://doi.org/10.1055/s-2006-931573)
- De Jesus, N.Z.T., Lima, J.C.D.S., Da Silva, R.M., Espinosa, M.M., Martins, D.T.D.O. (2009). Ethnobotanical survey of plants popularly used as anti-ulcer and anti-inflammatory in Pirizal, Nossa Senhora do Livramento, MT, Brazil | Levantamento etnobotânico de plantas popularmente utilizadas como antiúlceras e antiinflamatórias pela comunidade de Pirizal, Nossa Senhora do Livramento-MT, Brasil. *Revista Brasileira de Farmacognosia*, 19(1 A), pp. 130–139.
- De Lima, M.N.N., Guimarães, B.A., de Castro, A.L.S., ...Maia, J.G.S., Figueiredo, P.L.B. (2023). Chemical composition and antinociceptive and anti-inflammatory activity of the essential oil of *Hyptis crenata* Pohl ex Benth. from the Brazilian Amazon. *Journal of Ethnopharmacology*, 300, 115720.
- De Lima, V. T., Vieira, M. C., Kassuya, C. A. L., Cardoso, C. A. L., Alves, J. M., Foglio, M. A., De Carvalho, J. E., & Formagio, A. S. N. (2014). Chemical composition and free radical-scavenging, anticancer and anti-inflammatory activities of the essential oil from *Ocimum kilimandscharicum*. *Phytomedicine*, 21(11), 1298–1302. <https://doi.org/10.1016/j.phymed.2014.07.004>.
- De Macedo, L. M., Dos Santos, É. M., Militão, L., Tundisi, L. L., Ataíde, J. A., Souto, E. B., & Mazzola, P. G. (2020). Rosemary (*Rosmarinus officinalis* L., syn *salvia rosmarinus* spenn.) and its topical applications: A review. *Plants* (Vol. 9, Issue 5). MDPI AG. <https://doi.org/10.3390/plants9050651>.
- De Oliveira Ferreira, E., Soares Dias, M.Y., Rocha de Lima, N.M., Tavares Neves, K.R., Santos do Carmo, M.R., Viana Lima, F.A., Aragão Fonteles, A., Fontenele Menezes, A.P., Matos de Andrade, G. (2016). Neuroinflammatory response to experimental stroke is inhibited by eriodictyol. *Behavioural Brain Research*, 312, 321-332. <http://dx.doi.org/10.1016/j.bbr.2016.06.046>.
- De Pinho, J.P.M., Silva, A.S.B., Pinheiro, B.G., ...Da Cunha Sousa, P.J., Magalhães, P.J.C. (2012). Antinociceptive and antispasmodic effects of the essential oil of *Ocimum micranthum*: Potential anti-inflammatory properties. *Planta Medica*, 78(7), pp. 681–685.
- De Sousa Araújo, T.A., Alencar, N.L., de Amorim, E.L.C., de Albuquerque, U.P. (2008). A new approach to study medicinal plants with tannins and flavonoids contents from the local knowledge. *Journal of Ethnopharmacology*, 120(1), pp. 72–80.
- Demirci, F., Karaca, N., Tekin, M., Demirci, B. (2018). Anti-inflammatory and antibacterial evaluation of *Thymus sipyleus* Boiss. subsp. *sipyleus* var. *sipyleus* essential oil against rhinosinusitis pathogens. *Microbial Pathogenesis*, 122, pp. 117–121.

- Demirci, F., Karadağ, A. E., Biltekin, S. N., & Demirci, B. (2021). In Vitro ACE2 and 5-LOX Enzyme Inhibition by Menthol and Three Different Mint Essential Oils. *Natural Product Communications*, 16(11). doi.org/10.1177/1934578X211055014
- Dobrev, H.P. (2021). Treatment of numerous hand warts with *Clinopodium vulgare* tea. *Wiener Medizinische Wochenschrift*, 171(3-4), pp. 82–83.
- Donatello, N. N., Emer, A. A., Salm, D. C., Ludtke, D. D., Bordignon, S. A. S. R., Ferreira, J. K., Salgado, A. S. I., Venzke, D., Bretanha, L. C., Micke, G. A., & Martins, D. F. (2020). *Lavandula angustifolia* essential oil inhalation reduces mechanical hyperalgesia in a model of inflammatory and neuropathic pain: The involvement of opioid and cannabinoid receptors. *Journal of Neuroimmunology*, 340. doi.org/10.1016/j.jneuroim.2020.577145
- Dos Santos, E., Leitão, M. M., Agüero Ito, C. N., Silva-Filho, S. E., Arena, A. C., Silva-Comar, F. M. de S., Nakamura Cuman, R. K., Oliveira, R. J., Nazari Formagio, A. S., & Leite Kassuya, C. A. (2021). Analgesic and anti-inflammatory articular effects of essential oil and camphor isolated from *Ocimum kilimandscharicum* Gürke leaves. *Journal of Ethnopharmacology*, 269. https://doi.org/10.1016/j.jep.2020.113697
- Draginic, N., Andjic, M., Jeremic, J., Zivkovic, V., Kocovic, A., Tomovic, M., Bozin, B., Kladar, N., Bolevich, S., Jakovljevic, V., & Milosavljevic, I. (2022). Anti-inflammatory and Antioxidant Effects of *Melissa officinalis* Extracts: A Comparative Study. *Iranian Journal of Pharmaceutical Research*, 21(1). doi.org/10.5812/ijpr-126561
- Du, Y., Jin, Y., Liu, P., Shi, X., Xu, H., Wang, Q., & Zhang, L. (2013). Quantitative analysis of ten diterpenoids in rat bile after oral administration of *Isodon rubescens* extract by high performance liquid chromatography-electrospray ionization tandem mass spectrometry. *Journal of Liquid Chromatography and Related Technologies*, 36(9), 1264–1279. doi.org/10.1080/10826076.2012.686137
- Dubinnyi, M.A., Osmakov, D.I., Koshelev, S.G., ...Arseniev, A.S., Grishin, E.V. 2012. Lignan from thyme possesses inhibitory effect on ASIC3 channel current. *Journal of Biological Chemistry*, 287(39), pp. 32993–33000.
- Eidi A., Eidi TMM, Mozaffarian V., Rustaiyan A., Mazooji A.S., Khaboori Z., Nabiuni F. 2011. Antinociceptive and Anti-inflamatory Effects of Ethanolic Extract of *Salvia syriaca* L. in Mice. *International Journal of Pharmacology* 7(3): 394-399, 2011 DOI: 10.3923/p.2011.394.399
- El Kharraf, S., El-Guendouz, S., Farah, A., Bennani, B., Mateus, M. C., El Hadrami, E. M., & Miguel, M. G. (2021). Hydrodistillation and simultaneous hydrodistillation-steam distillation of *Rosmarinus officinalis* and *Origanum compactum*: Antioxidant, anti-inflammatory, and antibacterial effect of the essential oils. *Industrial Crops and Products*, 168. https://doi.org/10.1016/j.indcrop.2021.113591.

- El Menyiy, N., Mrabti, H. N., el Omari, N., Bakili, A. E. I., Bakrim, S., Mekkaoui, M., Balahbib, A., Amiri-Ardekani, E., Ullah, R., Alqahtani, A. S., Shahat, A. A., & Bouyahya, A. (2022). Medicinal Uses, Phytochemistry, Pharmacology, and Toxicology of *Mentha spicata*. In *Evidence-based Complementary and Alternative Medicine* (Vol. 2022). Hindawi Limited. doi.org/10.1155/2022/7990508
- El Sawi, S.A., Sleem, A.A., Merghany, R.M. 2021. *In vivo* antioxidant, anti-inflammatory and anti-hyperglycemic effects of *Salvia splendens* aerial parts in male albino rat models. *Journal of Herbs, Spices & Medicinal Plants* 27(2): 149-160. https://doi.org/10.1080/10496475.2021.1891173.
- El Yaagoubi, M., Mechqoq, H., El Hamdaoui, A., ...Msanda, F., El Aouad, N. (2021). A review on Moroccan *Thymus* species: Traditional uses, essential oils chemical composition and biological effects. *Journal of Ethnopharmacology*, 278, 114205.
- El-Askary, H., El-Kashoury, E., Kandil, Z., Salem, M., & Sleem, A. (2012). Chemical composition and biological activities of the essential oil of *Mentha suaveolens* Ehrh. *Z. Naturforsch*, 67(3), 571–579.
- Esquivel, B., Bustos-Brito, C., Sánchez-Castellanos, M., Nieto-Camacho, A., Ramírez-Apan, T., Joseph-Nathan, P., Quijano, L. (2017). Structure, absolute configuration, and antiproliferative activity of Abietane and Icetexane diterpenoids from *Salvia ballotiflora*. *Molecules*, 22(10), 1690. doi: 10.3390/molecules22101690.
- Estakhr, J., & Javdan, N. (2011). Evaluation of anti-inflammatory effects of ethanolic extract of *Salvia hypoleuca*. *Pharmacologyonline*, 2, 879-885.
- Estakhr, J., & Javdan, N. (2011a). *Salvia hypoleuca*; a new source of compounds which are useful for treatment of ocular inflammation. *Pharmacologyonline*, 3, 338-346. Retrieved from www.scopus.com
- Fawole, O. A., Amoo, S. O., Ndhlala, A. R., Light, M. E., Finnie, J. F., & van Staden, J. (2010). Anti-inflammatory, anticholinesterase, antioxidant, and phytochemical properties of medicinal plants used for pain-related ailments in South Africa. *Journal of Ethnopharmacology*, 127(2), 235–241. doi.org/10.1016/j.jep.2009.11.015
- Feng, J., Liu, L., Yao, F., Zhou, D., He, Y., & Wang, J. (2021). The protective effect of tanshinone IIA on endothelial cells: a generalist among clinical therapeutics. In *Expert Review of Clinical Pharmacology* 14(2), 239–248. doi.org/10.1080/17512433.2021.1878877
- Feng, X., Wang, X., Liu, Y., & Di, X. (2015). Linarin Inhibits the Acetylcholinesterase Activity In-vitro and Ex-vivo. In *Shaheed Beheshti University of Medical Sciences and Health Services Iranian Journal of Pharmaceutical Research* 14(3), 949-954.

- Fiuza, T., Rezende M., Sabóia-Morais, S., Tresvenzol, L., Ferreira H., Paula, J. 2008. Estudo das folhas e caule de *Hyptidendron canum* (Pohl ex Benth.) Harley, Lamiaceae. *Revista Brasileira de Farmacognosia Brazilian Journal of Pharmacognosy* 20(2): 192-200.
- Fraternale, D., Dufat, H., Albertini, M.C., Bouzidi, C., D’Adderio, R., Coppari, S., Di Giacomo, B., Melandri, D., Ramakrishna, S., Colomba, M. (2022). Chemical composition, antioxidant and anti-inflammatory properties of *Monarda didyma* L. essential oil. *PeerJ*, 10, e14433. doi: 10.7717/peerj.14433.
- Fushiya, S., Batkhuu, J., Takano, F., Hayasaka, H., Ohba, K., Yoshizaki, F., Dashi, T., Batsuren, D., & Sanchir, C. (2000). Effects of Mongolian plants on nitric oxide production in activated macrophages. *Natural Medicines*, 54(6), 352–357.
- García-Díaz, J. A., Navarrete-Vázquez, G., García-Jiménez, S., Hidalgo-Figueroa, S., Almanza-Pérez, J. C., Alarcón-Aguilar, F. J., Gómez-Zamudio, J., Cruz, M., Ibarra-Barajas, M., & Estrada-Soto, S. (2016). Antidiabetic, antihyperlipidemic and anti-inflammatory effects of tilianin in streptozotocin-nicotinamide diabetic rats. *Biomedicine & Pharmacotherapy*, 83, 667–675. doi.org/10.1016/j.biopha.2016.07.023
- Garzoli, S., Alarcón-Zapata, P., Seitimova, G., ...Pezzani, R., Vitalini, S. (2022). Natural essential oils as a new therapeutic tool in colorectal cancer. *Cancer Cell International*, 22(1), 407.
- Georgiev, Y. N., Paulsen, B. S., Kiyohara, H., Ciz, M., Ognyanov, M. H., Vasicek, O., Rise, F., Denev, P. N., Yamada, H., Lojek, A., Kussovski, V., Barsett, H., Krastanov, A. I., Yanakieva, I. Z., & Kratchanova, M. G. (2017). The common lavender (*Lavandula angustifolia* Mill.) pectic polysaccharides modulate phagocytic leukocytes and intestinal Peyer’s patch cells. *Carbohydrate Polymers*, 174, 948–959. doi.org/10.1016/j.carbpol.2017.07.011
- Ghorani, V., Beigoli, S., Khazdair, M. R., & Boskabady, M. H. (2022). The effect of *Zataria multiflora* on respiratory allergic and immunologic disorders, experimental and clinical evidence: A comprehensive review. In *Phytotherapy Research* 36(3), 1135–1155. doi.org/10.1002/ptr.7382
- Ghuman, S., Ncube, B., Finnie, J.F., McGaw, L.J., Njoya, E.M., Coopoosamy, R.M., Van-Staden, J., 2019. Antioxidant, anti-inflammatory and wound healing properties of medicinal plant extracts used to treat wounds and dermatological disorders. *South African Journal of Botany*. 126, 232–240. doi.org/10.1016/j.sajb.2019.07.013.
- Giovannini, D., Gismondi, A., Basso, A., Canuti, L., Braglia, R., Canini, A., Mariani, F., & Cappelli, G. (2016). *Lavandula angustifolia* mill. Essential oil exerts antibacterial and anti-inflammatory effect in macrophage mediated immune response to staphylococcus aureus. *Immunological Investigations*, 45(1), 11–28. doi.org/10.3109/08820139.2015.1085392
- González-Ramírez, A., González-Trujano, M. E., Pellicer, F., & López-Muñoz Francisco, J. (2012). Anti-nociceptive and anti-inflammatory activities of the *Agastache mexicana* extracts by using several experimental models in rodents. *Journal of Ethnopharmacology*, 142(3), 700–705. doi.org/10.1016/j.jep.2012.05.04

- Guginski, G., Luiz, A. P., Silva, M. D., Massaro, M., Martins, D. F., Chaves, J., Mattos, R. W., Silveira, D., Ferreira, V. M. M., Calixto, J. B., & Santos, A. R. S. (2009). Mechanisms involved in the antinociception caused by ethanolic extract obtained from the leaves of *Melissa officinalis* (lemon balm) in mice. *Pharmacology Biochemistry and Behavior*, 93(1), 10–16. doi.org/10.1016/j.pbb.2009.03.014
- Güneş, S., Savran, A., Paksoy, M. Y., Koşar, M., & Çakılcioglu, U. (2017). Ethnopharmacological survey of medicinal plants in Karaisalı and its surrounding (Adana-turkey). *Journal of Herbal Medicine*, 8, 68-75. doi:10.1016/j.hermed.2017.04.002
- Hajhashemi, V., Ghannadi, A., & Karim Pezeshkian, S. (2002). Antinociceptive and anti-inflammatory effects of *Satureja hortensis* L. extracts and essential oil. *Journal of Ethnopharmacology*, 82, 83–87. www.elsevier.com/locate/jethpharm
- Hajhashemi, V., Ghannadi, A., & Sharif, B. (2003). Anti-inflammatory and analgesic properties of the leaf extracts and essential oil of *Lavandula angustifolia* Mill. *Journal of Ethnopharmacology*, 89(1), 67–71. doi.org/10.1016/S0378-8741(03)00234-4
- Hajhashemi, V., Zolfaghari, B., & Yousefi, A. (2012). Antinociceptive and anti-inflammatory activities of *Satureja hortensis* seed essential oil, hydroalcoholic and polyphenolic extracts in animal models. *Medical Principles and Practice*, 21(2), 178–182. doi.org/10.1159/000333555
- Hamamouchi, J., El Mahi, M., & El Abbes Faouzi, M. (2021). Investigation of *Origanum compactum* essential oil for analgesic and anti-inflammatory activities. E3S Web of Conferences, 319. https://doi.org/10.1051/e3sconf/202131901104
- Harput US, Saracoglu I, Ogihara Y. 2006. Effects of two *Prunella* species on lymphocyte proliferation and nitric oxide production. *Phytotherapy Research* 20(2):157-159. https://doi: 10.1002/ptr.1805. PMID: 16444671.
- Hassan, Z. Y., Hassan, T. Y., & Abu-Raghif, A. R. (2022). Evaluation the Effectiveness of Phenolic Compound of *Salvia frigida* on Induced Atopic Dermatitis in Experimental Mice. *Iraqi Journal of Pharmaceutical Sciences*, 31(1), 154–166. doi.org/10.31351/vol31iss1pp154-166
- He, H., Jiang, H., Chen, Y., Ye, J., Wang, A., Wang, C., Liu, Q., Liang, G., Deng, X., Jiang, W., & Zhou, R. (2018). Oridonin is a covalent NLRP3 inhibitor with strong anti-inflammasome activity. *Nature Communications*, 9(1). doi.org/10.1038/s41467-018-04947-6
- Hernández-Herrera, A.D., Luna-Herrera, J., Del Rocío González-Martínez, M., Prieto-Hinojosa, A.I., Turcios-Esquivel, A.M., Castillo-Maldonado, I., Delgadillo-Guzmán, D., Ramírez-Moreno, A., Bustos-Brito, C., Esquivel, B., Vega-Menchaca, M.D., Pedroza-Escobar, D. (2023). Immunomodulatory activity of diterpenes over innate immunity and cytokine production in a human alveolar epithelial cell line infected with *Mycobacterium tuberculosis*. *Current Molecular Pharmacology*, 16(6), 682-689. doi: 10.2174/1874467215666221005115007.

- Hernandez-Perez, M., Rabanal, R. M., De La Torre, M. C., & Rodriguez, B. (1995). Analgesic, anti-inflammatory, antipyretic and haematological effects of aethiopinone, an o-naphthoquinone diterpenoid from *salvia aethiopis* roots and two hemisynthetic derivatives. *Planta Medica*, 61(6), 505-509. doi:10.1055/s-2006-959358
- Hong, S. S., Lee, C., Lee, C. H., Park, M., Lee, M. S., Hong, J. T., Lee, H., Lee, M. K., & Hwang, B. Y. (2009). A new furofuran lignan from *Isodon japonicus*. *Archives of Pharmacal Research*, 32(4), 501–504. <https://doi.org/10.1007/s12272-009-1404-x>
- Hosseinzadeh, H. & Yavary, M. (1999). Anti-inflammatory effect of *Salvia leriifolia* Benth. leaf extract in mice and rats. *Pharmaceutical and Pharmacological Letters*, 9(2), 60–61.
- Hosseinzadeh, H., Haddadkhodaparast, M. H., & Arash, A. R. (2003). Antinociceptive, antiinflammatory and acute toxicity effects of *Salvia leriifolia* benth. Seed extract in mice and rats. *Phytotherapy Research*, 17(4), 422–425. doi.org/10.1002/ptr.1154
- Hsu, C. L., Hong, B. O. H., Shan, Y. U., & Yen, G. C. (2010). Antioxidant and Anti-Inflammatory effects of *Orthosiphon aristatus* and its bioactive compounds. *Journal of Agricultural and Food Chemistry*, 58(4), 2150–2156. doi.org/10.1021/jf903557c
- Huang, B. P., Lin, C. H., Chen, Y. C., & Kao, S. H. (2014). Anti-inflammatory effects of *Perilla frutescens* leaf extract on lipopolysaccharide stimulated RAW264.7 cells. *Molecular Medicine Reports*, 10(2), 1077–1083. doi.org/10.3892/mmr.2014.2298
- Hussain, L., Sajid Hamid Akash, M., Imran Qadir, M., Pharm Sci, P. J., Iqbal, R., Irfan, M., & Imran Qadir, M. (2017). Analgesic, anti-inflammatory, and antipyretic activity of *Salvia moorcroftiana*. *Article in Pakistan Journal of Pharmaceutical Sciences* 30(2). [www.researchgate.net/publication/316007134](http://www.researchgate.net/publication/316007134).
- Hwang, B., Lee, J., Koo, T., Kim, H., Hong, Y., Ro, J., Lee, K., & Lee, J. (2001). Kaurane diterpenes from *Isodon japonicus* inhibit nitric oxide and prostaglandin E2 production and NF-KB activation in LPS-stimulated macrophage RAW264.7 cells. *Planta Medica*, 67, 406–410.
- Hwang, Y. J., Lee, E. J., Kim, H. R., & Hwang, K. A. (2013). NF-κB-targeted anti-inflammatory activity of *Prunella vulgaris* var. lilacina in macrophages RAW 264.7. *International Journal of Molecular Sciences*, 14(11), 21489–21503. doi.org/10.3390/ijms141121489.
- Ibrahim A. Y., Shahat A., Mohamed T., Elshamy A., Alqahtani A., Saleh I., Hassan E. & Hegazy M. 2020. In vitro anti-inflammatory and acetylcholinesterase inhibition efficiency of plant extracts from Sinai-Egypt. *Indian Journal of Traditional Knowledge*, 19 (3): 635-641.
- Ibrahim, A. Y., Youness, E. R., Shalaby, A. S., & Magd El-Din, M. (2016). Anti-acetylcholinesterase, Anti-inflammatory and Anti-oxidant Activities of *Mentha longifolia* for Treating Alzheimer Disease. *Der Pharmacia Lettre*, 8(7), 34–39.



- Ikoma, K., Takahama, M., Kimishima, A., Pan, Y., Taura, M., Nakayama, A., Arai, M., Takemura, N., & Saitoh, T. (2022). Oridonin suppresses particulate-induced NLRP3-independent IL-1 $\alpha$  release to prevent crystallopathy in the lung. *International Immunology*, 34(10), 493–504. <https://doi.org/10.1093/intimm/dxac018>
- Jang, H. H., Cho, S. Y., Kim, M. J., Kim, J. B., Lee, S. H., Lee, M. Y., & Lee, Y. M. (2016). Anti-inflammatory effects of *Salvia plebeia* R. Br extract in vitro and in ovalbumin-induced mouse model. *Biological Research*, 49(1). [doi.org/10.1186/s40659-016-0102-7](https://doi.org/10.1186/s40659-016-0102-7)
- Jang, H. H., Lee, S., Lee, S. J., Lim, H. J., Jung, K., Kim, Y. H., Lee, S. W., & Rho, M. C. (2017). Anti-inflammatory Activity of Eudesmane-Type Sesquiterpenoids from *Salvia plebeia*. *Journal of Natural Products*, 80(10), 2666–2676. [doi.org/10.1021/acs.jnatprod.7b00326](https://doi.org/10.1021/acs.jnatprod.7b00326)
- Javdan, N., & Estakhr, J. (2011b). Evaluation of the effects of *Salvia hypoleuca* on the expression of cytokines: IL-6, IL-10 and TNF- $\alpha$  in high fat diet-fed mice towards a cure for diabetes mellitus. *Pharmacologyonline*, 2, 842-852. Retrieved from [www.scopus.com](http://www.scopus.com)
- Jeong, H., Sung, M., Kim, Y., Ham, H., Choi, Y., & Lee, J. (2012). Anti-inflammatory activity of *Salvia plebeia* R. Br. leaf through heme oxygenase-1 induction in LPS-stimulated RAW264.7 macrophages. *Journal of the Korean Society of Food Science and Nutrition*, 41(7), 888–894. [doi.org/10.3746/jkfn.2012.41.7.888](https://doi.org/10.3746/jkfn.2012.41.7.888)
- Jia, T., Cai, M., Ma, X., Li, M., Qiao, J., & Chen, T. (2019). Oridonin inhibits IL-1 $\beta$ -induced inflammation in human osteoarthritis chondrocytes by activating PPAR- $\gamma$ . *International Immunopharmacology*, 69, 382–388. [doi.org/10.1016/j.intimp.2019.01.049](https://doi.org/10.1016/j.intimp.2019.01.049)
- Jiang, H., Li, X., Sun, H., Zhang, H., Puno, P. (2018). Scopariusols L-T, nine new ent-kaurane diterpenoids isolated from *Isodon scoparius*. *Chinese Journal of Natural Medicines*, 16(6), 456–464.
- Jiang, H.-Y., Wang, W.-G., Zhou, M., Wu, H.-Y., Zhan, R., Du, X., Pu, J.-X., Sun, H.-D. (2014a). 6,7-seco-ent-Kaurane diterpenoids from *Isodon sculponeatus* and their bioactivity. *Chinese Chemical Letters*, 25, 541–544. <http://dx.doi.org/10.1016/j.cclet.2014.01.041>
- Jiang, H.-Y., Wang, W.-G., Zhou, M., Wu, H.-Y., Zhan, R., Li, X.-N., Du, X., Li, Y., Pu, J.-X., Sun, H.-D. (2014b). Diterpenoids from *Isodon sculponeatus*, *Fitoterapia*, 93, 142–149. <http://dx.doi.org/10.1016/j.fitote.2013.12.025>.
- Kamatou, G. P. P., & Viljoen, A. M. (2010). A review of the application and pharmacological properties of  $\alpha$ -bisabolol and  $\alpha$ -bisabolol-rich oils. *JAOCs, Journal of the American Oil Chemists' Society*, 87(1), 1-7. [doi:10.1007/s11746-009-1483-3](https://doi.org/10.1007/s11746-009-1483-3)

- Kamatou, G. P. P., Makunga, N. P., Ramogola, W. P. N., & Viljoen, A. M. (2008). South african *Salvia* species: A review of biological activities and phytochemistry. *Journal of Ethnopharmacology*, 119(3), 664-672. doi:10.1016/j.jep.2008.06.030
- Kamatou, G. P. P., Van Zyl, R. L., Van Vuuren, S. F., Viljoen, A. M., Figueiredo, A. C., Barroso, J. G. & Tilney, P. M. (2006). Chemical composition, leaf trichome types and biological activities of the essential oils of four related *Salvia* species indigenous to southern Africa. *Journal of Essential Oil Research*, 18, 72-79. doi:10.1080/10412905.2006.12067125
- Kamatou, G. P. P., Viljoen, A. M., & Steenkamp, P. (2010). Antioxidant, antiinflammatory activities and HPLC analysis of south african *Salvia* species. *Food Chemistry*, 119(2), 684-688. doi:10.1016/j.foodchem.2009.07.010.
- Kamatou, G. P. P., Viljoen, A. M., Gono-Bwalya, A. B., Van Zyl, R. L., Van Vuuren, S. F., Lourens, A. C. U., Steenkamp, P. (2005). The *in vitro* pharmacological activities and a chemical investigation of three south african *Salvia* species. *Journal of Ethnopharmacology*, 102(3), 382-390. doi:10.1016/j.jep.2005.06.034
- Kamatou, G.P.P., Van Zyl, R.L., Van Vuuren, S.F., Viljoen, A.M., Figueiredo, A.C., Barroso, J.G., Pedro, L.G. (2006). Biological activities and composition of *Salvia muirii* L. essential oil. *Journal of Essential Oil Research* 18, 48-51. <https://doi.org/10.1080/10412905.2006.12067119>.
- Kamatou, G.P.P., Viljoen, A.M., Figueiredo, A.C., Tilney, P.M., Van Zyl, R.L., Barroso, J.G., Pedro, L.G., Van Vuuren, S.F. (2007). Trichomes, essential oil composition and biological activities of *Salvia albicaulis* Benth. And *S. dolomitica* Codd, two species from the Cape region of South Africa. *South African Journal of Botany* 73: 102-108. <https://doi.org/10.1016/j.sajb.2006.08.001>
- Kang, H. (2018). Anti-inflammatory mechanism of *Isodon Japonicas* (Burm) hara on lipopolysaccharide-induced neuroinflammation. *Tropical Journal of Pharmaceutical Research*, 17(1), 85–89. <https://doi.org/10.4314/tjpr.v17i1.13>
- Kangwan, N., Pintha, K., Khanaree, C., Kongkarnka, S., Chewonarin, T., & Suttajit, M. (2021). Anti-inflammatory effect of *Perilla frutescens* seed oil rich in omega-3 fatty acid on dextran sodium sulfate-induced colitis in mice. *Research in Pharmaceutical Sciences*, 16(5), 464–473. doi.org/10.4103/1735-5362.323913
- Kapewangolo, P., Hussein, A. A., & Meyer, D. (2013). Inhibition of HIV-1 enzymes, antioxidant and anti-inflammatory activities of *Plectranthus barbatus*. *Journal of Ethnopharmacology*, 149(1), 184–190. doi.org/10.1016/j.jep.2013.06.019
- Kapewangolo, P., Omolo, J.J., Bruwer, R., Fonteh, P., Meyer, D. (2015). Antioxidant and anti-inflammatory activity of *Ocimum labiatum* extract and isolated labdane diterpenoid. *Journal of Inflammation* 12, 4.doi: 10.1186/s12950-015-0049-4.

- Karaca, N., Demirci, B., Gavahian, M., Demirci, F. (2023). Enhanced Bioactivity of Rosemary, Sage, Lavender, and Chamomile Essential Oils by Fractionation, Combination, and Emulsification. *ACS Omega*, 8(12), pp. 10941–10953.
- Karakaş, Ö., & Bekler, F. M. (2022). Essential oil compositions and antimicrobial activities of *Thymbra spicata* L. var. *spicata* L., *Lavandula X intermedia* Emeric ex Loisel., *Satureja macrantha* C. A. MEYER and *Rosmarinus officinalis* L. *Brazilian Archives of Biology and Technology*, 65, 1-11. doi:10.1590/1678-4324-2022210297.
- Karimian, P., Kavooosi, G., & Amirghofran, Z. (2013). Anti-inflammatory effect of *Mentha longifolia* in lipopolysaccharide- stimulated macrophages: Reduction of nitric oxide production through inhibition of inducible nitric oxide synthase. *Journal of Immunotoxicology*, 10(4), 393–400. doi.org/10.3109/1547691X.2012.758679
- Kenari, H.M., Yousefsani, B.S., Eghbalian, F., ...Jamshidi, A.H., Mahroozade, S. (2021). Herbal recommendations for treatment of COVID-19 symptoms according to Persian medicine. *Journal of Medicinal Plants*, 20(77), pp. 1–14
- Khalighi-Sigaroodi, F., Ahvazi, M., Ebrahimzadeh, H., & Rahimifard, N. (2013). Chemical composition of the essential oil and antioxidant activities, total phenol and flavonoid content of the extract of *Nepeta pogonosperma*. *Journal of Medicinal Plants*, 12(48), 185–199.
- Khan, S., & Iqbal Yattoo, M. (n.d.). Potential herbs for bovine mastitis research-a mini review Anti-Neoplastic effects of Garcinol View project NFBSFARA project in 2010-11 session View project. <https://www.researchgate.net/publication/358925222>
- Khankandi, H. P., Behzad, S., Mojab, F., Ahmadian-Attari, M. M., & Sahranavard, S. (2019). Effects of some Lamiaceae species on NO production and cell injury in hydrogen peroxide-induced stress. *Iranian Journal of Pharmaceutical Research*, 18(2), 826–835. doi.org/10.22037/ijpr.2019.1100685
- Khazdair, M. R., Ghorani, V., Alavinezhad, A., & Boskabady, M. H. (2018). Pharmacological effects of *Zataria multiflora* Boiss L. and its constituents focus on their anti-inflammatory, antioxidant, and immunomodulatory effects. In *Fundamental and Clinical Pharmacology* (Vol. 32, Issue 1, pp. 26–50). Blackwell Publishing Ltd. doi.org/10.1111/fcp.12331
- Khouchlaa, A., Et-Touys, A., Lakhdar, F., ...El Idrissi, A.E.Y., Zaakour, F. (2022). Ethnomedicinal use, phytochemistry, pharmacology, and toxicology of *Salvia verbenaca* L.: A review. *Biointerface Research in Applied Chemistry*, 12(2), pp. 1437–1469.

- Kim, B. W., Koppula, S., Kim, I. S., Lim, H. W., Hong, S. M., Han, S. D., Hwang, B. Y., & Choi, D. K. (2011). Anti-neuroinflammatory activity of kamebakaurin from *Isodon japonicus* via inhibition of c-Jun NH2-terminal kinase and p38 mitogen-activated protein kinase pathway in activated microglial cells. *Journal of Pharmacological Sciences*, 116(3), 296–308. <https://doi.org/10.1254/jphs.10324FP>
- Kim, B., Han, Y. E., & Lee, H. J. (2017). Antioxidant and anti-inflammatory effects of the ethyl acetate fraction of the *Agastache rugosa* extract. *Korean Journal of Food Science and Technology*, 49(3), 331–337. doi.org/10.9721/KJFST.2017.49.3.331
- Kim, D., Lee, S.K., Park, K.-S., Park, H.-J. 2020. Isolation of the constituents from *Clinopodium chinense* var. *shibetchense* and inhibition activity on cancer cell growth and nitric oxide production. *Korean Journal of Pharmacognosy*, 51(2), pp. 93–99.
- Kim, H., Hong, J. Y., Jeon, W. J., Lee, J., Baek, S. H., & Ha, I. H. (2021). *Lycopus lucidus* Turcz. exerts neuroprotective effects against H2O2-induced neuroinflammation by inhibiting nlrp3 inflammasome activation in cortical neurons. *Journal of Inflammation Research*, 14, 1759–1773. <https://doi.org/10.2147/JIR.S305031>
- Kim, H.-H., Yoo, J.-S., Lee, H.-S., ...Shin, T.-Y., Kim, S.-H. (2011). *Elsholtzia ciliata* inhibits mast cell-mediated allergic inflammation: Role of calcium, p38 mitogen-activated protein kinase and nuclear factor-κB. *Experimental Biology and Medicine*, 236(9), pp. 1070–1077.
- Kim, J. Y., Kim, H. S., Kim, Y. J., Lee, H. K., Kim, J. S., Kang, J. S., Hong, J. T., Kim, Y., Hwang, B. Y., & Han, S. B. (2013). Effusanin C inhibits inflammatory responses via blocking NF-κB and MAPK signaling in monocytes. *International Immunopharmacology*, 15(1), 84–88. <https://doi.org/10.1016/j.intimp.2012.11.002>
- Kim, J., Song, S., Lee, I., Kim, Y., Yoo, I., Ryoo, I., & Bae, K. (2011). Anti-inflammatory activity of constituents from *Glechoma hederacea* var. *longituba*. *Bioorganic and Medicinal Chemistry Letters*, 21(11), 3483–3487. doi.org/10.1016/j.bmcl.2011.02.002
- Kim, K. M., Kim, S. Y., Mony, T. J., Bae, H. J., Han, S. D., Lee, E. S., Choi, S. H., Hong, S. H., Lee, S. D., & Park, S. J. (2021). *Dracocephalum moldavica* ethanol extract suppresses LPS-induced inflammatory responses through inhibition of the jnk/erk/nf-κb signaling pathway and il-6 production in raw 264.7 macrophages and in endotoxic-treated mice. *Nutrients*, 13(12). doi.org/10.3390/nu13124501
- Kim, M.; Sowndhararajan, K.; Kim, S. 2022. The Chemical Composition and Biological Activities of Essential Oil from Korean Native Thyme Bak-Ri-Hyang (*Thymus quinquecostatus* Celak.). *Molecules* 2022,27,4251. doi.org/10.3390/molecules27134251.

- Kim, S. Y., Han, S. D., Kim, M., Mony, T. J., Lee, E. S., Kim, K. M., Choi, S. H., Hong, S. H., Choi, J. W., & Park, S. J. (2021b). *Mentha Arvensis* essential oil exerts anti-inflammatory in LPS-stimulated inflammatory responses via inhibition of ERK/nf- $\kappa$ b signaling pathway and anti-atopic dermatitis-like effects in 2,4-dinitrochlorobezene-induced BALB/C mice. *Antioxidants*, 10(12). doi.org/10.3390/antiox10121941
- Kim, T.-W., Kim, Y.-J., Seo, C.-S., ...Lee, M.-Y., Jung, J.-Y. (2016). *Elsholtzia ciliata* (Thunb.) Hylander attenuates renal inflammation and interstitial fibrosis via regulation of TGF- $\beta$  and Smad3 expression on unilateral ureteral obstruction rat model. *Phytomedicine*, 23(4), pp. 331–339.
- Kim, W., Son, K., Chang, H., Bae, K., Kang, S., Kim, H. (2003). Anti-Inflammatory activity of *Elsholtzia splendens*. *Archives of Pharmacol Research*, 26(3), 232–236.
- Ko, H.M., Koppula, S., Kim, B.-W., Kim, I.S., Hwang, B.Y., Suk, K., Park, E.J., Choi, D.-K. (2010). *European Journal of Pharmacology*, 633, 98–106. doi:10.1016/j.ejphar.2010.02.011.
- Kogiannou, D.A.A., Kalogeropoulos, N., Kefalas, P., Polissiou, M.G., Kaliora, A.C. (2013). Herbal infusions; their phenolic profile, antioxidant and anti-inflammatory effects in HT29 and PC3 cells. *Food and Chemical Toxicology*, 61, 152–159. http://dx.doi.org/10.1016/j.fct.2013.05.027.
- Kosar, M.; Goger, F.; Can Baser, K.H. *In vitro* antioxidant properties and phenolic composition of *Salvia virgata* Jacq. from Turkey. *J. Agric. Food Chem.*, 2008, 6, 2369-2374.
- Kostić, M., Kitić, D., Petrović, M. B., Jevtović-Stoimenov, T., Jović, M., Petrović, A., & Živanović, S. (2017). Anti-inflammatory effect of the *Salvia sclarea* L. ethanolic extract on lipopolysaccharide-induced periodontitis in rats. *Journal of Ethnopharmacology*, 199, 52–59. doi.org/10.1016/j.jep.2017.01.020
- Kulabas, S. S., Ipek, H., Tufekci, A. R., Arslan, S., Demirtas, I., Ekren, R., Sezerman, U., & Tumer, T. B. (2018). Ameliorative potential of *Lavandula stoechas* in metabolic syndrome via multitarget interactions. *Journal of Ethnopharmacology*, 223, 88–98. doi.org/10.1016/j.jep.2018.04.043
- Kumar, A., Singh, S., Kumar, A., Umrao Bawankule, D., Tandon, S., Kumar, A., Swaroop Verma, R., Saikia, D. (2021). Chemical composition, bactericidal kinetics, mechanism of action, and anti-inflammatory activity of *Isodon melissoides* (Benth.) H. Hara essential oil, *Natural Product Research*, 35:4, 690-695. <https://doi.org/10.1080/14786419.2019.1591399>.
- Laura González Pereyra, M., Cariddi, L. N., Ybarra, F., Isola, M. C., Demo, M. S., Sabini, L., & Maldonado, A. M. (n.d.). Immunomodulating properties of *Minthostachys verticillata* on human lymphocytes and basophils. [www.revistasmedicasmexicanas.com.mx](http://www.revistasmedicasmexicanas.com.mx)
- Lee, J.W., Lee, M.S., Kim, T.H., Lee, H.J., Hong, S.S., Noh, Y.H., Hwang, B.Y., Ro, J.S., Hong, J.T. (2007). Inhibitory effect of Inflexinol on Nitric Oxide Generation and iNOS expression via inhibition of NF- $\kappa$ B activation. *Mediators of Inflammation*, 2007, 93148. doi: 10.1155/2007/93148.

- Lee, Y. J., Kang, D. G., Kim, J. S., & Lee, H. S. (2008). *Lycopus lucidus* inhibits high glucose-induced vascular inflammation in human umbilical vein endothelial cells. *Vascular Pharmacology*, 48(1), 38–46. <https://doi.org/10.1016/j.vph.2007.11.004>
- Lee, Y., Lim, H. W., Ryu, I. W., Huang, Y. H., Park, M., Chi, Y. M., & Lim, C. J. (2020). Anti-Inflammatory, Barrier-Protective, and Antiwrinkle Properties of *Agastache rugosa* Kuntze in Human Epidermal Keratinocytes. *BioMed Research International*, 2020. doi.org/10.1155/2020/1759067
- Li C., Luo Y., Zhang W., Cai Q., Wu X., Tan Z., Chen R., Chen Z., Wang S., Zhang L. 2021. A comparative study on chemical compositions and biological activities of four essential oils: *Cymbopogon citratus* (DC.) Stapf, *Cinnamomum cassia* (L.) Presl, *Salvia japonica* Thunb. and *Rosa rugosa* Thunb. *Journal of Ethnopharmacology* 280:114472. [https://doi: 10.1016/j.jep.2021.114472](https://doi.org/10.1016/j.jep.2021.114472)
- Li L, Zhou M, Xue G, Wang W, Zhou X, Wang X, Kong L, Luo J. 2018. Bioactive seco-abietane rearranged diterpenoids from the aerial parts of *Salvia prionitis*. *Bioorganic Chemistry* 81:454-460. [https://doi: 10.1016/j.bioorg.2018.08.040](https://doi.org/10.1016/j.bioorg.2018.08.040)
- Li, J., Du, J., Sun, L., Liu, J., & Quan, Z. (2010). Anti-Inflammatory Function of Nodosin via Inhibition of IL-2. *The American Journal of Chinese Medicine* (Vol. 38, Issue 1). [www.worldscientific.com](http://www.worldscientific.com)
- Li, L., Huang, Q., Duan, X., Han, L., Peng, D. (2020). Protective effect of *Clinopodium chinense* (Benth.) O. Kuntze against abnormal uterine bleeding in female rats. *Journal of Pharmacological Sciences*, 143(1), pp. 1–8
- Li, L.-L., Huang, Q., Peng, D.-Y., Qi, J.-J., Yao, M. (2022). Anti-inflammatory and hemostatic effects of total extract, saponins, and flavonoids of *Clinopodium chinense* in female rats with abnormal uterine bleeding and mechanism. *Zhongguo Zhongyao Zazhi*, 47(12), pp. 3372–337
- Li, Y. X., Liu, Y. B., Ma, A. Q., Bao, Y., Wang, M., & Sun, Z. L. (2017). In vitro antiviral, anti-inflammatory, and antioxidant activities of the ethanol extract of *Mentha piperita* L. *Food Science and Biotechnology*, 26(6), 1675–1683. doi.org/10.1007/s10068-017-0217-9
- Li, Y.-M., Zou, H.-Y., Hu, H.-Y., Di, L., Li, H.-L., Hu, Z., Lin, L., Liao, D., Xia, B., & Lin, Y. (2020). Effect of water extract of *Prunella vulgaris* on NLRP3/Caspase-1/IL-1B pathway in rats with allergic conjunctivitis. *Chinese Journal of New Drugs*, 29(8), 929–933. doi.org/10.1097/ACI.0000000000000100
- Lim, H. W., Lee, Y., Huang, Y. H., Yoon, J. Y., Lee, S. H., Kim, K., & Lim, C. J. (2017). Enhancement of skin antioxidant and anti-inflammatory potentials of *Agastache rugosa* leaf extract by probiotic bacterial fermentation in human epidermal keratinocytes. *Microbiology and Biotechnology Letters*, 45(1), 35–42. doi.org/10.4014/mb.1701.01002.

- Lim, J. Y., Won, T. J., Hwang, B. Y., Kim, H. R., Hwang, K. W., Sul, D., & Park, S. Y. (2010). The new diterpene isodojaponin D inhibited LPS-induced microglial activation through NF-kappaB and MAPK signaling pathways. *European Journal of Pharmacology*, 642(1–3), 10–18. <https://doi.org/10.1016/j.ejphar.2010.05.047>
- Ling-Fei, K., Xiao-Juan, R., Pan, Y., ...Tian-Le, G., Cai, T. (2023). The influence of *Hyssopus cuspidatus* Boriss extract on lipid mediators metabolism network in asthmatic mice. *Frontiers in Pharmacology*, 14, 1066643.
- Lino, C.S., Gomes, P.B., Lucetti, D.L., ...Silva, M.G.V., Viana, G.S.B. (2005). Evaluation of antinociceptive and antiinflammatory activities of the essential oil (EO) of *Ocimum micranthum* Willd. from northeastern Brazil. *Phytotherapy Research*, 19(8), pp. 708–712.
- Liu, D., Wang, Y., Lu, Z., Lv, F., Bie, X., & Zhao, H. (2022b). Separation, characterization, and anti-inflammatory activities of galactoglycerolipids from *Perilla frutescens* (L.) Britton. *Natural Product Research*. [doi.org/10.1080/14786419.2022.2095637](https://doi.org/10.1080/14786419.2022.2095637).
- Liu, X., Su, J., Wang, G., ...Wang, S., Huang, Y. (2021). Discovery of phenolic glycoside from *Hyssopus cuspidatus* attenuates LPS-induced inflammatory responses by inhibition of iNOS and COX-2 expression through suppression of NF-κB activation. *International Journal of Molecular Sciences*, 22(22), 12128.
- Liu, X., Wang, G., Lv, C., ...Wang, S., Huang, Y. (2021). Two new phenolic acids and one new phenolic glycoside from *Hyssopus cuspidatus* Boriss and their anti-inflammatory activities. *Phytochemistry Letters*, 46, pp. 15–20.
- Liu, Y., Song, H., Xu, J., Bi, G., & Meng, D. (2022). Anti-inflammatory abietanes diterpenes and triterpenoids isolated from *Clinopodium polycephalum*. *Fitoterapia*, 161. [doi.org/10.1016/j.fitote.2022.105244](https://doi.org/10.1016/j.fitote.2022.105244)
- Llorent-Martínez, E. J., Ruiz-Medina, A., Zengin, G., Ak, G., Jugreet, S., Mahomoodally, M. F., Chiavaroli, A. (2022). New biological and chemical evidences of two Lamiaceae species (*Thymbra capitata* and *Thymus sipyleus* subsp. *rosulans*): In vitro, in silico and ex vivo approaches. *Molecules*, 27(24) [doi:10.3390/molecules27249029](https://doi.org/10.3390/molecules27249029)
- Loizzo, M., Menichini, F., Tundis, R., Bonesi, M., Conforti, F., Nadjafi, F., Statti, G., Frega, N., & Menichini, F. (2009). In vitro biological activity of *Salvia lerrifolia* Benth essential oil relevant to the treatment of Alzheimer’s disease. *Journal of Oleo Science*, 58(8), 443–446.
- Í Lopez-Garcia, R.E., Rabanal, R.M., Darias, V., Martín-Herrera, D., Carreiras, M.C. and Rodríguez, B. (1991), A preliminary study of *Cedronella canariensis* (L.) var. *Canariensis* extracts for antiinflammatory and analgesic activity in rats and mice. *Phytotherapy Research*, 5: 273-275. [doi.org/10.1002/ptr.2650050610](https://doi.org/10.1002/ptr.2650050610)

- Lucca, L.G., Romão, P.R.T., Vignoli-Silva, M., da VeigaJunior, V.F., Koester, L.S. (2022). *In vivo* Acute Anti-Inflammatory Activity of Essential Oils: A Review. *Mini-Reviews in Medicinal Chemistry*, 22(11), pp. 1495–1515.
- Luís, Â., & Domingues, F. (2021). Screening of the potential bioactivities of pennyroyal (*Mentha pulegium* L.) essential oil. *Antibiotics*, 10(10). doi.org/10.3390/antibiotics10101266
- Ma, X., Ma, X., Ma, Z., Wang, J., Sun, Z., Yu, W., Li, F., & Ding, J. (2014). Effect of *Hyssopus officinalis* L. on inhibiting airway inflammation and immune regulation in a chronic asthmatic mouse model. *Experimental and Therapeutic Medicine*, 8(5), 1371–1374. doi.org/10.3892/etm.2014.1978
- Magalhães, A., Santos, G. B., Verdam, M. C., Fraporti, L., Malheiro, A., Lima, E. S., & Dos-Santos, M. C. (2011). Inhibition of the inflammatory and coagulant action of Bothrops atrox venom by the plant species *Marsypianthes chamaedrys*. *Journal of Ethnopharmacology*, 134(1), 82–88. doi.org/10.1016/j.jep.2010.11.062.
- Mahalakshmi, B., Huang, C. Y., Lee, S. da, Maurya, N., kiefer, R., & Bharath Kumar, V. (2021). Review of Danshen: From its metabolism to possible mechanisms of its biological activities. In *Journal of Functional Foods* 85. Elsevier Ltd. doi.org/10.1016/j.jff.2021.104613
- Mahmoud AM, Wilkinson FL, Sandhu MA, Dos Santos JM, Alexander MY. 2019. Modulating oxidative stress in drug-induced injury and metabolic disorders: the role of natural and synthetic antioxidants. *Oxidative Medicine and Cellular Longevity* 2019:3206401. https://doi: 10.1155/2019/3206401.
- Mahmoudi, M., Morteza-Semnani, K., & Mojra, E. (2008). Anti-inflammatory and antinociceptive activity of *Thymus pubescens* extract. *Fitoterapia*, 79(5), 361–365. doi.org/10.1016/j.fitote.2008.04.004
- Mahomoodally, M. F., Devi Dursun, P., & Venugopala, K. N. (2021). *Collinsonia canadensis* L. In *Naturally Occurring Chemicals against Alzheimer's Disease*, 373–377. Elsevier. doi.org/10.1016/B978-0-12-819212-2.00031-1
- Maklad, Y. A., Aboutabl, E. A., El-Sherei, M. M., & Meselhy, K. M. (1999). Bioactivity studies of *Salvia transsylvanica* (Schur ex Griseb) grown in Egypt. *Phytotherapy Research*, 13(2), 147–150. doi.org/10.1002/(SICI)1099-1573(199903)13:2<147:AID-PTR397>3.0.CO;2-E
- Martins-Gomes, C., Taghouti, M., Schäfer, J., Silva, A.M., Nunes, F.M. 2018. Chemical characterization and bioactive properties of decoctions and hydroethanolic extracts of *Thymus carnosus* Boiss. *Journal of Functional Foods*, 43, pp. 154–164.



- Mayadah B. Shehadeh, Silvio Sosa, Ghadeer A.R.Y. Suaifan, Rula M. Darwish, Anna Giangaspero, Antonio Vassallo, Laura Lepore, Sawsan A. Oran, Hana Hammad, Aurelia Tubaro, Nunziatina De Tommasi, Roberto Della Loggia. 2014. Topical Anti-Inflammatory Potential of Six *Salvia* Species Grown in Jordan. *Jordan Journal of Pharmaceutical Sciences*, 7, No. 2, 2014.
- Mehmet, S. I., Gürbüz, I., Bedir, E., Günbatan, T., Demirci, F., 2021. Isolation of rosmarinic acid and methyl rosmarinate as lipoxygenase inhibitors from *Salvia palaestina* Benth. by activity-guided fractionation. *South African Journal of Botany* 141: 177-182. <https://doi.org/10.1016/j.sajb.2021.04.030>
- Memariani, Z., Rahimi, A., Farzaei, M.H., Zakaria Nejad, N. (2019). *Nepeta menthoides* Boiss. & Buhse, an endemic species in Iran: A review of traditional uses, phytochemistry and pharmacology. *Journal of Herbmед Pharmacology*, 8(3), 194-204. doi: 10.15171/jhp.2019.29.
- Messaoudi, M., Rebiai, A., Sawicka, B., Atanassova, M., Ouakouak, H., Larkem, I., Egbuna, C., Awuchi, C. G., Boubekur, S., Ferhat, M. A., Begaa, S., & Benchikha, N. (2022). Effect of extraction methods on polyphenols, flavonoids, mineral elements, and biological activities of essential oil and extracts of *Mentha pulegium* L. *Molecules*, 27(1). [doi.org/10.3390/molecules27010011](https://doi.org/10.3390/molecules27010011)
- Mićović, T., Katanić Stanković, J. S., Bauer, R., Nöst, X., Marković, Z., Milenković, D., Jakovljević, V., Tomović, M., Bradić, J., Stešević, D., Stojanović, D., & Maksimović, Z. (2022). In vitro, in vivo and in silico evaluation of the anti-inflammatory potential of *Hyssopus officinalis* L. subsp. aristatus (Godr.) Nyman (Lamiaceae). *Journal of Ethnopharmacology*, 293. [doi.org/10.1016/j.jep.2022.115201](https://doi.org/10.1016/j.jep.2022.115201)
- Miguel, M. G., da Silva, C. I., Farah, L., Braga, F. C., & Figueiredo, A. C. (2021). Effect of essential oils on the release of TNF- $\alpha$  and CCL2 by LPS-stimulated THP-1 cells. *Plants*, 10(1), 1–14. [doi.org/10.3390/plants10010050](https://doi.org/10.3390/plants10010050)
- Milijasevic, B., Steinbach, M., Mikov, M., Raskovic, A., Capo, I., Zivkovic, J., Borisev, I., Canji, J., Teofilovic, B., Vujcic, M., & Popovic, M. (2022). Impact of winter savory extract (*Satureja montana* L.) on biochemical parameters in serum and oxidative status of liver with application of the principal component analysis in extraction solvent selection. *European Review for Medical and Pharmacological Sciences*, 26, 4721–4734.
- Miller KI, Qing C, Sze DM, Neilan BA. (2012). Investigation of the Biosynthetic Potential of Endophytes in Traditional Chinese Anticancer Herbs. *PLoS ONE* 7(5): e35953. [doi:10.1371/journal.pone.0035953](https://doi.org/10.1371/journal.pone.0035953)
- Min, G. Y., Kim, E. Y., Hong, S., Kim, J. H., Kim, M., Kim, E. J., Park, J. H., Sohn, Y., & Jung, H. S. (2021). *Lycopus lucidus* Turcz. ameliorates DNCB-induced atopic dermatitis in BALB/c mice. *Molecular Medicine Reports*, 24(6). <https://doi.org/10.3892/mmr.2021.12467>.

- Minaian, M., Sadraei, H., Asghari, G., Khanabadi, M., & Minaian, M. (2017). Anti-inflammatory effect of apigenin and hydroalcoholic extract of *Dracocephalum kotschy* on acetic acid-induced colitis in rats. *Research in Pharmaceutical Sciences* (Vol. 12, Issue 4).
- Minaian, M., Sadraei, H., Yousefi, I., Sajjadi, S. E., & Talebi, A. (2021). Evaluation of the effect of hydroalcoholic and flavonoid-enriched extracts of *Dracocephalum kotschy* on indomethacin-induced gastric ulcer in rats. *Research in Pharmaceutical Sciences*, 16(2), 141–152. <https://doi.org/10.4103/1735-5362.310521>
- Miraj, S., & Kiani, S. (2016). A review study of therapeutic effects of *Salvia officinalis* L. *Der Pharmacia Lettre*, 8(6), 299–303. [www.researchgate.net/publication/305147951](http://www.researchgate.net/publication/305147951)
- Miranda R.S., de Jesus B.D.S.M., da Silva Luiz S.R., Viana C.B., Adão Malafaia C.R., Figueiredo F.S., Carvalho T.D.S.C., Silva M.L., Londero V.S., da Costa-Silva T.A., Lago J.H.G., Martins R.C.C. (2022). Antiinflammatory activity of natural triterpenes-An overview from 2006 to 2021. *Phytother Research* 36(4):1459-1506. <https://doi: 10.1002/ptr.7359>.
- Modarres, M., Asili, J., Lahouti, M., Gangali, A., Iranshahy, M., & Sahebkar, A. (2014). Simultaneous determination of rosmarinic acid, salvianolic acid B and caffeic acid in *Salvia leriifolia* Benth. root, leaf and callus extracts using a high-performance liquid chromatography with diode-array detection technique. *Journal of Liquid Chromatography and Related Technologies*, 37(12), 1721–1730. [doi.org/10.1080/10826076.2013.807466](https://doi.org/10.1080/10826076.2013.807466)
- Mogosan, C., Vostinaru, O., Oprean, R., Heghes, C., Filip, L., Balica, G., Moldovan, R. I., & Schmidt, T. J. (2017). A comparative analysis of the chemical composition, anti-inflammatory, and antinociceptive effects of the essential oils from three species of *Mentha* cultivated in Romania. *Molecules*, 22(2). <https://doi.org/10.3390/molecules22020263>
- Mohanty, S., Kamolvit, W., Zambrana, S., Sandström, C., Gonzales, E., Östenson, C. G., & Brauner, A. (2017). Extract of *Clinopodium bolivianum* protects against E. coli invasion of uroepithelial cells. *Journal of Ethnopharmacology*, 198, 214–220. [doi.org/10.1016/j.jep.2017.01.011](https://doi.org/10.1016/j.jep.2017.01.011)
- Mohsenzadeh, A., Ahmadipour, S., Ahmadipour, S., & Asadi-Samani, M. (2016). A review of the most important medicinal plants effective on cough in children and adults. *Der Pharmacia Lettre*, 8(1), 90-96.
- Montaz, S. and Abdollahi, M.. (2010). An Update on Pharmacology of *Satureja* Species; From Antioxidant, Antimicrobial, Antidiabetes and Anti-hyperlipidemic to Reproductive Stimulation. *International Journal of Pharmacology* 6 (4): 346-353.
- Montironi, I. D., Reinoso, E. B., Paullier, V. C., Siri, M. I., Pianzzola, M. J., Moliva, M., Campra, N., Bagnis, G., Ferreira LaRocque-de-Freitas, I., Decote-Ricardo, D., Freire-de-Lima, C. G., Raviolo, J. M., & Cariddi, L. N. (2019). *Minthostachys verticillata* essential oil activates macrophage phagocytosis and modulates the innate immune response in a murine model of Enterococcus faecium mastitis. *Research in Veterinary Science*, 125, 333–344. <https://doi.org/10.1016/j.rvsc.2019.07.015>

- Moraes, L. A. S., Facanali, R., Ortiz, M., Marques, M., Ming, L. C., Angela, M., & Meireles, A. (2002). Phytochemical characterization of essential oil from *Ocimum selloi*. 74(1), 183–186. [www.scielo.br/aabc](http://www.scielo.br/aabc)
- Moreno, L., Bello, R., Primo, E., & Esplugues, J. (2002). Pharmacological properties of the methanol extract from *Mentha suaveolens* Ehrh. *Phytotherapy Research*, 16(S1), 10–13. <https://doi.org/10.1002/ptr.744>
- Moretti, M. D. L., Peana, A. T., & Satta, M. (1997). A study on anti-inflammatory and peripheral analgesic action of *Salvia sclarea* oil and its main components. *Journal of Essential Oil Research*, 9(2), 199–204. [doi.org/10.1080/10412905.1997.9699459](https://doi.org/10.1080/10412905.1997.9699459)
- Moshrefi-Araghi, A., Nemati, H., Azizi, M., Moshtaghi, N., & Shoor, M. (2021). Association of Genetic Structure and Diversity in Iranian Wild Germplasms of *Mentha longifolia* L. Based on Phenotypical, Biochemical, and Molecular Markers. *Chemistry and Biodiversity*, 18(4). [doi.org/10.1002/cbdv.202001044](https://doi.org/10.1002/cbdv.202001044)
- Mousavi Nia, A., Pari Kalantaripour, T., Basiri, M., Vafaei, F., Asadi-Shekaari, M., Eslami, A., & Darvish Zadeh, F. (2017). *Nepeta Dschuparensis* Bornm Extract Moderates COX-2 and IL-1 $\beta$  Proteins in a Rat Model of Cerebral Ischemia. *Iran Journal of Medicine Sciences*, 42(2), 179–186.
- Mousavi, Z., Hosaini, A. S., Asgarpanah, J., & Najafizadeh, P. (2016). Antinociceptive effect of the endemic species *Nepeta depauperata* Benth. *Jundishapur Journal of Natural Pharmaceutical Products*, 11(2). [doi.org/10.17795/jjnpp-25623](https://doi.org/10.17795/jjnpp-25623)
- Moussaid, M., Elamrani, A. E., Bourhim, N., & Benaissa, M. (2011). *In Vivo* Anti-Inflammatory and *In Vitro* Antioxidant Activities of Moroccan Medicinal Plants. In *NPC Natural Product Communications* (Vol. 6, Issue 10).
- Murad, H. A. S., Abdallah, H. M., & Ali, S. S. (2016). *Mentha longifolia* protects against acetic-acid induced colitis in rats. *Journal of Ethnopharmacology*, 190, 354–361. [doi.org/10.1016/j.jep.2016.06.016](https://doi.org/10.1016/j.jep.2016.06.016)
- Murata, T., Oyama, K., Fujiyama, M., Oobayashi, B., Umehara, K., Miyase, T., & Yoshizaki, F. (2013). Diastereomers of lithospermic acid and lithospermic acid B from *Monarda fistulosa* and *Lithospermum erythrorhizon*. *Fitoterapia*, 91, 51–59. <https://doi.org/10.1016/j.fitote.2013.08.009>
- Mustarichie, R., Moektiwardojo, M., Apriani Dewi W. (2017). Isolation, Identification, and Characteristic of Essential Oil of Iler (*Plectranthus scutellarioides* (L.) R.Br leaves. *Journal of Pharmaceutical Sciences and Research*, 9(11), 2218-2223.

- Mustarichie, R., Ramdhani, D., Mekar Saptarini, N. (2022). The anti-inflammatory tablet formulation of *Coleus (Plectranthus scutellarioides)* leaves extract using Kollicoat® protect coating. *International Journal of Applied Pharmaceutics*, 14(4), 159-162.
- Müzell, D., Lunardelli, A., Leite, C. E., Medeiros Fagundes, R., Saciura, V. C., Reichel, C. L., Rodrigues De Oliveira, J., & Vieira Astarita, L. (2013). Nephroprotective and Anti-inflammatory Effects of Aqueous Extract of *Melissa officinalis* L. on Acetaminophen-induced and Pleurisy-induced Lesions in Rats. *Brazilian Archives of Biology and Technology*, 56(3), 383–392.
- Nahak, G., & Sahu, R. (2014). Immunomodulatory activity of aqueous leaf extract of *Ocimum kilimandscharicum* Guerke in *Clarias batrachus*. *Int. J. Pharm. Sci. Rev. Res.*, 28(2), 137–146.
- Napagoda M, Gerstmeier J, Butschek H, Lorenz S, De Soyza S, Qader M, Nagahawatte A, Wijayaratne GB, Schneider B, Svatoš A, Jayasinghe L, Koeberle A, Werz O. 2022. *Plectranthus zeylanicus*: A rich source of secondary metabolites with antimicrobial, disinfectant and anti-inflammatory activities. *Pharmaceuticals (Basel)* 15(4):436. [https://doi: 10.3390/ph15040436](https://doi.org/10.3390/ph15040436).
- Napagoda M, Gerstmeier J, Wesely S, Popella S, Lorenz S, Scheubert K, Svatoš A, Werz O. 2014. Inhibition of 5-lipoxygenase as anti-inflammatory mode of action of *Plectranthus zeylanicus* Benth. and chemical characterization of ingredients by a mass spectrometric approach. *Journal of Ethnopharmacology* 151(2):800-809. [https:// doi: 10.1016/j.jep.2013.11.004](https://doi.org/10.1016/j.jep.2013.11.004)
- Naseef H., Al-Maharik N., Rabba A, Sharifi-Rad M., Hawash M., Jaradat N. 2022. Phytochemical characterization and assessments of antimicrobial, cytotoxic and anti-inflammatory properties of *Lavandula coronopifolia* Poir. volatile oil from Palestine. *Arabian Journal of Chemistry* (2022) 15, 104069. [doi.org/10.1016/j.arabjc.2022.104069](https://doi.org/10.1016/j.arabjc.2022.104069)
- Neelamkavil, S.V., Thoppil, J.E. (2013). C-mitotic effect of aqueous extracts of *Isodon coetsa* (Buch.-Ham. ex D. Don) Kudo (Lamiaceae). *Nucleus*, 56(2), 117–122. <https://doi.org/10.1007/s13237-013-0083-7>.
- Neelamkavil, S.V., Thoppil, J.E. (2014). Toxicological evaluation of polar and nonpolar components of *Isodon coetsa* (Lamiaceae). *Turkish Journal of Botany*, 38, 252-257. [doi: 10.3906/bot-1306-4](https://doi.org/10.3906/bot-1306-4).
- Nguyen, D.T.X., Tran, H., Schwaiger, S., Stuppner, H., Marzocco, S. (2021). Effect of Non-Volatile Constituents of *Elsholtzia ciliata* (Thunb.) Hyl. from Southern Vietnam on Reactive Oxygen Species and Nitric Oxide Release in Macrophages. *Chemistry and Biodiversity*, 18(1), e2000577.
- Nicolescu, A., Babotă, M., Ilea, M., Dias, M. I., Calhelha, R. C., Gavrilăș, L., Rocchetti, G., Crișan, G., Mocan, A., Barros, L., & Pârvu, A. E. (2022). Potential therapeutic applications of infusions and hydroalcoholic extracts of Romanian glutinous sage (*Salvia glutinosa* L.). *Frontiers in Pharmacology*, 13. <https://doi.org/10.3389/fphar.2022.975800>
- Nie, L., Li, R., Huang, J., Wang, L., Ma, M., Huang, C., Wu, T., Yan, R., Hu, X. (2021) Abietane diterpenoids from *Dracocephalum moldavica* L. and their anti-inflammatory activities in vitro. *Phytochemistry*. 184:112680. [doi: 10.1016/j.phytochem.2021.112680](https://doi.org/10.1016/j.phytochem.2021.112680).

- Nworu, C. S., & Akah, P. A. (2015). Anti-inflammatory medicinal plants and the molecular mechanisms underlying their activities. *African Journal of Traditional, Complementary and Alternative Medicines*, 12(S1), 52-61. doi:10.4314/ajtcam.v12i5.3S.
- Oh TH, Kim SS, Yoon WJ, Kim JY, Yang EJ, Lee NH, Hyun CG. 2009. Chemical composition and biological activities of Jeju *Thymus quinquecostatus* essential oils against *Propionibacterium* species inducing acne. *The Journal of General and Applied Microbiology*, 55 I 1 Pages 63-68. doi.org/10.2323/jgam.55.63
- Olajide, O. A., Oladiran, O. O., Awe, S. O., & Makinde, J. M. (1998). Pharmacological evaluation of *Hoslundia opposita* extract in rodents. *Phytotherapy Research*, 12(5), 364–366. doi.org/10.1002/(SICI)1099-1573(199808)12:5<364::AID-PTR292>3.0.CO;2-N
- Olennikov, D.N., Chirikova, N.K., Okhlopkova, Z.M., Zulfugarov, I.S. (2013). Chemical composition and antioxidant activity of *Tánara Ótó* (*Dracocephalum palmatum* Stephan), a medicinal plant used by the North-Yakutian nomads. *Molecules*, 18(11), 14105-14121. doi: 10.3390/molecules181114105.
- Oliveira, A. S., Rolo, J., Gaspar, C., Cavaleiro, C., Salgueiro, L., Palmeira-de-Oliveira, R., Ferraz, C., Coelho, S., Pastorinho, M. R., Sousa, A. C., Teixeira, J. P., Martinez-de-Oliveira, J., & Palmeira-de-Oliveira, A. (2022). Chemical characterization and bioactive potential of *Thymus × citriodorus* (Pers.) Schreb. preparations for anti-acne applications: Antimicrobial, anti-biofilm, anti-inflammatory and safety profiles. *Journal of Ethnopharmacology*, 287. doi.org/10.1016/j.jep.2021.114935
- Oliveira, A. S., Rolo, J., Gaspar, C., Ramos, L., Cavaleiro, C., Salgueiro, L., Palmeira-de-Oliveira, R., Teixeira, J. P., Martinez-de-Oliveira, J., & Palmeira-de-Oliveira, A. (2023). *Thymus mastichina* (L.) L. and *Cistus ladanifer* L. for skin application: chemical characterization and in vitro bioactivity assessment. *Journal of Ethnopharmacology*, 302. https://doi.org/10.1016/j.jep.2022.115830
- Orfali, R., Siddiqui, N.A., Alam, P., Alhowiriny, T.A., Al-Taweel, A.M., Al-Yahya, S., Majrashi, N.M., Mehmood, R., Khan, S.I., Perveen, S. (2018). Biological evaluation of different extracts of aerial parts of *Nepeta deflersiana* and standardization of active extracts using 8-Epi-7-Deoxyloganic acid and ursolic acid by Validated HPTLC method", *Evidence-Based Complementary and Alternative Medicine*, 2018, 8790769, 11. doi: https://doi.org/10.1155/2018/8790769.
- Osmakov, D.I., Koshelev, S.G., Belozerova, O.A., ...Grishin, E.V., Kozlov, S.A. (2015). Biological activity of Sevanol and its analogues. *Russian Journal of Bioorganic Chemistry*, 41(5), pp. 543–547
- Osmakov, D.I., Koshelev, S.G., Belozerova, O.A., ...Grishin, E.V., Kozlov, S.A. (2015).The Biological Activity of the Sevanol and Its Analogues. *Bioorganicheskaiia khimiia*, 41(5), pp. 606–611
- Paksoy, M.Y., Selvi, S., Savran, A. (2016). Ethnopharmacological survey of medicinal plants in Ulukİşla (Niğde-Turkey). *Journal of Herbal Medicine*, 6(1), pp. 42–48.

- Pandey, A.K., Singh, P., Tripathi, N.N. (2014). Chemistry and bioactivities of essential oils of some *Ocimum* species: An overview. *Asian Pacific Journal of Tropical Biomedicine*, 4(9), pp. 682–694.
- Pandur, E., Balatinácz, A., Micalizzi, G., Mondello, L., Horváth, A., Sipos, K., & Horváth, G. (2021). Anti-inflammatory effect of lavender (*Lavandula angustifolia* Mill.) essential oil prepared during different plant phenophases on THP-1 macrophages. *BMC Complementary Medicine and Therapies*, 21(1). doi.org/10.1186/s12906-021-03461-5
- Pandur, E., Micalizzi, G., Mondello, L., Horváth, A., Sipos, K., & Horváth, G. (2022). Antioxidant and Anti-Inflammatory Effects of Thyme (*Thymus vulgaris* L.) Essential Oils Prepared at Different Plant Phenophases on Pseudomonas aeruginosa LPS-Activated THP-1 Macrophages. *Antioxidants*, 11(7). doi.org/10.3390/antiox11071330
- Pargaien, A. V., Bisht, N., Joshi, H., Pargaien, S., & Adhikari, M. (n.d.). Analysis of ethanomedicinally potential extract of *Nepeta cataria*. In Copyright@ EM International (Vol. 26).
- Park, S. H., Koo, H. J., Sung, Y. Y., & Kim, H. K. (2013). The protective effect of *Prunella vulgaris* ethanol extract against vascular inflammation in TNF- $\alpha$ -stimulated human aortic smooth muscle cells. *BMB Reports*, 46(7), 352–357. doi.org/10.5483/BMBRep.2013.46.7.214
- Park, S., Kim, S., Suk, K., Lee, H., Kwon, T., Ju, M., Jeon, H., Kim, D., Lim, J., Shin, T. (2010) *Clinopodium gracile* inhibits mast cell-mediated allergic inflammation: involvement of calcium and nuclear factor-kappaB. *Experimental Biological Medicine* 235(5), 606-613. doi: 10.1258/ebm.2010.009292. PMID: 20463301
- Parsaei, P., Bahmani, M., Karimi, M., Naghdi, N., Asadi-Samani, M., & Rafieian-Kopaei, M. (2016). A review of analgesic medicinal plants in Iran. *Der Pharmacia Lettre*, 8(2), 43-51. Retrieved from www.scopus.com
- Pattanayak, P., Behera, P., Das, D., & Panda, S. (2010). *Ocimum sanctum* Linn. A reservoir plant for therapeutic applications: An overview. In *Pharmacognosy Reviews* 4(7), 95–105. doi.org/10.4103/0973-7847.65323
- Pavel, M., Vostinaru, O., Mogosan, C., & Ghibu, S. (2011). Phytochemical and pharmacological research on some extracts obtained from Serpylli herba. *Farmacia*, 59(1), 77–84.
- Peana, A. T., & Moretti, M. D. L. (2002). Pharmacological activities and applications of *Salvia sclarea* and *Salvia desoleana* essential oils doi:10.1016/S1572-5995(02)80012-6 Retrieved from www.scopus.com
- Peana, A. T., Moretti, M. D. L., & Juliano, C. (1999). Chemical composition and antimicrobial action of the essential oils of *Salvia desoleana* and *S. sclarea*. *Planta Medica*, 65(8), 752-754. doi:10.1055/s-2006-960857
- Peana, A., & Satta, M. (1993). A preliminary research on essential oils of *Salvia sclarea* L. and *Salvia desoleana* A. et p. *Pharmacological Research*, 27, 25-26. doi:10.1006/phrs.1993.1048

- Petrova, M., Dimitrova, L., Dimitrova, M., ...Lazarova, M., Tasheva, K. (2023). Antitumor and Antioxidant Activities of *In Vitro* Cultivated and Wild-Growing *Clinopodium vulgare* L. Plants. *Plants*, 12(8), 1591
- Piccinelli A.C., Figueiredo de Santana Aquino D., Morato P.N., Kuraoka-Oliveira A.M., Strapasson R.L., Dos Santos E.P., Stefanello M.É., Oliveira R.J., Kassuya C.A. 2014. Anti-inflammatory and antihyperalgesic activities of ethanolic extract and fruticulin A from *Salvia lachnostachys* leaves in mice. *Evidence Based Complementary and Alternative Medicine* 2014:835914. [https://doi: 10.1155/2014/835914](https://doi.org/10.1155/2014/835914)
- Piva, R. C., Verdan, M. H., Branquinho, L. S., Kassuya, C. A. L., & Cardoso, C. A. L. (2021). Anti-inflammatory activity and chemical composition of aqueous extract and essential oil from leaves of *Ocimum selloi* Benth. *Journal of Ethnopharmacology*, 275. <https://doi.org/10.1016/j.jep.2021.114136>
- Prescott, T. A. K., Veitch, N. C., & Simmonds, M. S. J. (2011). Direct inhibition of calcineurin by caffeoyl phenylethanoid glycosides from *Teucrium chamaedrys* and *Nepeta cataria*. *Journal of Ethnopharmacology*, 137(3), 1306–1310. <https://doi.org/10.1016/j.jep.2011.07.063>
- Pudziuelyte, L., Liaudanskas, M., Jekabsone, A., Sadauskiene, I., (2020). Bernatoniene, J. *Elsholtzia ciliata* (Thunb.) Hyl. extracts from different plant parts: Phenolic composition, antioxidant, and anti-inflammatory activities. *Molecules*, 25(5), 1153.
- Qadir MI, Parveen A, Abbas K, Ali M.. 2016. Analgesic, anti-inflammatory and anti-pyretic activities of *Thymus Linearis*. *Pak. J. Pharm. Sci.*, 29, 2, 2016, pp.591-594.
- Qi, J., Zhang, Q., Li, L., ...Wang, N., Peng, D. (2022). Spectrum-effect relationship between UPLC-Q-TOF-MS fingerprint and anti-AUB effect of *Clinopodium chinense* (Benth.) O. Kuntze. *Journal of Pharmaceutical and Biomedical Analysis*, 217, 114828. <https://doi.org/10.1016/j.jpba.2022.114828>.
- Raal, A., Paaver, U., Arak, E., & Orav, A. (2004). Content and composition of the essential oil of *Thymus serpyllum* L. growing wild in Estonia. *Medicina (Kaunas)*, 40(8), 795–800.
- Righi, N., Boumerfeg, S., Deghima, A., ...Coimbra, M.A., Baghiani, A. (2021). Phenolic profile, safety assessment, and anti-inflammatory activity of *Salvia verbenaca* L. *Journal of Ethnopharmacology*, 272, 113940.
- Rocha, J., Direito, R., Lima, A., Mota, J., Gonçalves, M., Duarte, M. P., Solas, J., Peniche, B. F., Fernandes, A., Pinto, R., Ferreira, R. B., Sepodes, B., & Figueira, M. E. (2019). Reduction of inflammation and colon injury by a Pennyroyal phenolic extract in experimental inflammatory bowel disease in mice. *Biomedicine and Pharmacotherapy*, 118. [doi.org/10.1016/j.biopha.2019.109351](https://doi.org/10.1016/j.biopha.2019.109351)

- Rodríguez Basso, A., Carranza, A., Zainutti, V. M., Bach, H., & Gorzalczany, S. B. (2021). Pharmacological activity of peperina (*Minthostachys verticillata*) on gastrointestinal tract. *Journal of Ethnopharmacology*, 269. <https://doi.org/10.1016/j.jep.2020.113712>
- Rowshan, V., & Najafian, S. (2020). Polyphenolic contents and antioxidant activities of aerial parts of *Salvia multicaulis* from the Iran flora. *Natural Product Research*, 34(16), 2351-2353. doi:10.1080/14786419.2018.1533832
- Roxana, S. P., Vivian, M. C., Yazmín, R. C., Daisy, C. Q., Victor, G. C., David, M. D., . . . Lourdes, A. V. (2012). Effects of a hydroalcoholic extract from cuban population of *Salvia coccinea* L. on a model of acute inflammation. *Revista Electronica De Veterinaria*, 13(6).
- Roxo, M., Zuzarte, M., Gonçalves, M.J. et al. 2020. Antifungal and anti-inflammatory potential of the endangered aromatic plant *Thymus albicans*. (2020) 10:18859. doi.org/10.1038/s41598-020-75244-w.
- Ruiz-Malagón, A. J., Rodríguez-Sanchez, M. J., Rodríguez-Sojo, M. J., Vezza, T., Pischel, I., Algieri, F., Rodríguez-Cabezas, M. E., Rodríguez-Nogales, A., & Gálvez, J. (2022). Intestinal anti-inflammatory and visceral analgesic effects of a *Serpylli herba* extract in an experimental model of irritable bowel syndrome in rats. *Frontiers in Pharmacology*, 13. doi.org/10.3389/fphar.2022.967644
- Ruiz-Malagón, A. J., Rodríguez-Sojo, M. J., Hidalgo-García, L., Molina-Tijeras, J. A., García, F., Pischel, I., Romero, M., Duarte, J., Diez-Echave, P., Rodríguez-Cabezas, M. E., Rodríguez-Nogales, A., & Gálvez, J. (2022b). The Antioxidant Activity of *Thymus serpyllum* Extract Protects against the Inflammatory State and Modulates Gut Dysbiosis in Diet-Induced Obesity in Mice. *Antioxidants*, 11(6). doi.org/10.3390/antiox11061073
- Ruppelt, B.M., Pereira, E.F., Gonçalves, L., & Pereira, N.A. (1991). Pharmacological screening of plants recommended by folk medicine as anti-snake venom-I. Analgesic and anti-inflammatory activities. *Memorias do Instituto Oswaldo Cruz*, 86(2), 203-5.
- Ryu, S. Y., Oak, M.-H., Yoon, S.-K., Cho, D.-I., Yoo, G.-S., Kim, T.-S., Kim, K.-M., Thieme, G., Stuttgart, V., & York, N. (2000). Anti-Allergic and Anti-Inflammatory Triterpenes from the Herb of *Prunella vulgaris*. *Planta Medica*, 66, 358.
- Sahrial I, Solfaine R (2019). *Coleus amboinicus* extract increases transforming growth factor-1 $\beta$  expression in Wistar rats with cisplatin-induced nephropathy, *Veterinary World*, 12(8): 1346-1351. doi: 10.14202/vetworld.2019.1346-1351.
- Salehi, B., Mishra, A. P., Shukla, I., Sharifi-Rad, M., Contreras, M. del M., Segura-Carretero, A., Fathi, H., Nasrabadi, N. N., Kobarfard, F., & Sharifi-Rad, J. (2018). Thymol, thyme, and other plant sources: Health and potential uses. In *Phytotherapy Research* (Vol. 32, Issue 9, pp. 1688–1706). John Wiley and Sons Ltd. doi.org/10.1002/ptr.6109



- Santana, F. R., de Santana Souza, M. T., Camargo, E. A., & Silva, J. A. da. (2022). Anti-inflammatory and antinociceptive effects of a pectinolide-enriched fraction from *Mesosphaerum pectinatum* (L.) Kuntze. *Journal of Ethnopharmacology*, 115916. doi.org/10.1016/j.jep.2022.115916
- Saoulajan, C., Boujida, N., El Mihyaoui, A., El Baakili, A., Alshahrani, M. M., Lee, L. -, & Bouyahya, A. (2022). Phytochemistry, pharmacological investigations, industrial applications, and encapsulation of *Thymbra capitata* L., a review. *Trends in Food Science and Technology*, 129, 463-491. doi:10.1016/j.tifs.2022.10.014.
- Sarikurkcü, C., Sabih Ozer, M., Eskici, M., Tepe, B., Can, S., Mete, E., 2010. Essential oil composition and antioxidant activity of *Thymus longicaulis* C. Presl subsp. longicaulis var. longicaulis. *Food Chem. Toxicol.* 48, 1801–1805.
- Semaoui, R., Ouafi, S., Machado, S., Barros, L., Ferreira, I. C. F. R., & Oliveira, M. B. P. P. (2021). Infusion of aerial parts of *Salvia chudaei* Batt. & Trab. from Algeria: Chemical, toxicological and bioactivities characterization. *Journal of Ethnopharmacology*, 280. doi.org/10.1016/j.jep.2021.114455
- Shabbir, A., Batool, S. A., Basheer, M. I., Shahzad, M., Sultana, K., Tareen, R. B., Iqbal, J., & Saeed-ul-Hassan. (2018). *Ziziphora clinopodioides* ameliorated rheumatoid arthritis and inflammatory paw edema in different models of acute and chronic inflammation. *Biomedicine and Pharmacotherapy*, 97, 1710–1721. doi.org/10.1016/j.biopha.2017.11.118
- Shaikh, R., Pund, M., Dawane, A., Iliyas, S. (2014). Evaluation of anticancer, antioxidant, and possible anti-inflammatory properties of selected medicinal plants used in Indian traditional medication. *Journal of Traditional and Complementary Medicine* 4(4), 253-257.
- Shan, M., Jiang, Y., Fu, Y., ...Zhang, L., Wu, Q. (2021). A review of the botany, traditional uses, phytochemistry and pharmacology of *Nepeta tenuifolia* Briq. *Phytochemistry Reviews*, 20(5), pp. 991–1012
- Shanaida, M., Hudz, N., Jasicka-Misiak, I., & Wieczorek, P. P. (2021). Polyphenols and Pharmacological Screening of a *Monarda fistulosa* L. dry Extract Based on a Hydrodistilled Residue By-Product. *Frontiers in Pharmacology*, 12. https://doi.org/10.3389/fphar.2021.563436
- Shanaida, M., Jasicka-Misiak, I., Bialon, M., Korablova, O., & Wieczorek, P. P. (2021). Chromatographic profiles of the main secondary metabolites in the *Monarda fistulosa* l. Aerial part. *Research Journal of Pharmacy and Technology*, 14(4), 2179–2184. https://doi.org/10.52711/0974-360X.2021.00385
- Shanmugam, G., Sundaramoorthy, A., & Shanmugam, N. (2021). Biosynthesis of silver nanoparticles from leaf extract of *Salvia coccinea* and its effects of anti-inflammatory potential in human monocytic THP-1 cells. *ACS Applied Bio Materials*, 4(12), 8433-8442. doi:10.1021/acsabm.1c00963

- Sharifabad, A. H., Sadraei, H., Hashemnia, M., Sajjadi, S. E., & Mirdamadi, Z. (2021). Effect of hydroalcoholic and aqueous extracts of *Dracocephalum kotschyi* on bleomycin induced pulmonary fibrosis. *Journal of HerbMed Pharmacology*, 10(2), 209–217. <https://doi.org/10.34172/jhp.2021.23>
- Sharifi-Rad, M., Berkay Yilmaz, Y., Antika, G., Salehi, B., Tumer, T. B., Kulandaisamy Venil, C., Das, G., Patra, J. K., Karazhan, N., Akram, M., Iqbal, M., Imran, M., Sen, S., Acharya, K., Dey, A., & Sharifi-Rad, J. (2021). Phytochemical constituents, biological activities, and health-promoting effects of the genus *Origanum*. In *Phytotherapy Research* (Vol. 35, Issue 1, pp. 95–121). John Wiley and Sons Ltd. [doi.org/10.1002/ptr.6785](https://doi.org/10.1002/ptr.6785)
- Shehadeh, M. B., Sosa, S., Suaifan, Darwish, R. M., Giangaspero, A., Vassallo, A., Lepore, L., Oran, S., Hammad, H., Tubaro, A., De Tommasi, N., Loggia, R. D. (2014). Topical anti-inflammatory potential of six *Salvia* species grown in Jordan. *Jordan Journal of Pharmaceutical Sciences*, 7(2), 153-161. [doi:10.12816/0026806](https://doi.org/10.12816/0026806)
- Shen, W., Anwaiser, G., Cao, Y., Lian, G., Chen, C., Liu, S., Tuerdi, N., & Qi, R. (2019). Atheroprotective Mechanisms of Tilianin by Inhibiting Inflammation Through Down-Regulating NF-κB Pathway and Foam Cells Formation. *Frontiers in Physiology*, 10. [doi.org/10.3389/fphys.2019.00825](https://doi.org/10.3389/fphys.2019.00825)
- Sheychenko, O. P., Sheychenko, V. I., Goryainov, S. v., Zvezdina, E. v., Kurmanova, E. N., Ferubko, E. v., Uyutova, E. v., Potanina, O. G., & Fadi, K. (2021). Chemical composition and biological activity of the dry extract “Rosmatin” from the herb of *Dracocephalum moldavica* L. *Khimiya Rastitel’nogo Syr’ya*, 3, 253–264. [doi.org/10.14258/JCPRM.2021039161](https://doi.org/10.14258/JCPRM.2021039161)
- Shi, Q.Q., Dang, J., Wen, H.X., Yuan, X., Tao, Y.D., Wang, Q.L. (2016). Anti-hepatitis, antioxidant activities and bioactive compounds of *Dracocephalum heterophyllum* extracts. *Botanical Studies*, 57(1):16. [doi: 10.1186/s40529-016-0133-y](https://doi.org/10.1186/s40529-016-0133-y).
- Shimizu, M., Shogawa, H., Matsuzawa, T., ...Suzuki, S., Berganza, A. (1990). Anti-inflammatory Constituents of Topically Applied Crude Drugs: IV: Constituents And Anti-inflammatory Effect of Paraguayan Crude Drug “Alhucema” (*Lavandula latifolia* Vill.). *Chemical and Pharmaceutical Bulletin*, 38(8), pp. 2283–2284
- Shin, T. Y., Kim, S. H., Choi, C. H., Shin, H. Y., & Kim, H. M. (2004). *Isodon japonicus* decreases immediate-type allergic reaction and tumor necrosis factor-α production. *International Archives of Allergy and Immunology*, 135(1), 17–23. <https://doi.org/10.1159/000080038>
- Shin, T. Y., Kim, S. H., Suk, K., Ha, J. H., Kim, I. K., Lee, M. G., Jun, C. D., Kim, S. Y., Lim, J. P., Eun, J. S., Shin, H. Y., & Kim, H. M. (2005). Anti-allergic effects of *Lycopus lucidus* on mast cell-mediated allergy model. *Toxicology and Applied Pharmacology*, 209(3), 255–262. [doi.org/10.1016/j.taap.2005.04.011](https://doi.org/10.1016/j.taap.2005.04.011)
- Shipa, S.J., Khandokar, L., Bari, M.S., ...Haque, M.A., Mohamed, I.N. (2022). An insight into the anti-ulcerogenic potentials of medicinal herbs and their bioactive metabolites. *Journal of Ethnopharmacology*, 293, 115245.

- Singh, D., & Chaudhuri, P. K. (2018). A review on phytochemical and pharmacological properties of Holy basil (*Ocimum sanctum* L.). In *Industrial Crops and Products* (Vol. 118, pp. 367–382). Elsevier B.V. doi.org/10.1016/j.indcrop.2018.03.048
- Singh, M. K., Gidwani, B., Gupta, A., Dhongade, H., Kaur, C. D., Kashyap, P. P., & Tripathi, D. K. (2015). A review of the medicinal plants of genus *Orthosiphon* (Lamiaceae). *International Journal of Biological Chemistry*, 9(6), 318–331. doi.org/10.3923/ijbc.2015.318.331
- Sitarek, P., Kowalczyk, T., Synowiec, E., Merecz-Sadowska, A. Bangay, G., Princiotta, S. Sliwinski, T.; Rijo, P. 2022. An evaluation of the novel biological properties of diterpenes isolated from *Plectranthus ornatus* Codd. *In vitro* and in silico. *Cells* 11, 3243. https://doi.org/10.3390/cells11203243.
- Slighoua, M., Mahdi, I., ez-zahra Amrati, F., Boucetta, N., Cristo, F. di, Boukhira, S., el youbi el Hamsas, A., Tattou, M. I., Grafov, A., Bari, A., & Bousta, D. (2022). Pharmacological effects of *Lavandula officinalis* Chaix and its polyphenols: Focus on their in vivo estrogenic and anti-inflammatory properties. *South African Journal of Botany*, 146, 354–364. doi.org/10.1016/j.sajb.2021.11.014
- Solfaine, R., Muniroh, L., Sadarman, Apriza, & Irawan, A. (2021). Anti-inflammatory effect of *Coleus amboinicus* leaves extract on uric acid-induced nephrotoxicity rats. *Advances in Animal and Veterinary Sciences*, 9(10), 1553-1558. doi:10.17582/journal.aavs/2021/9.10.1553.1558.
- Sosa S, Altinier G, Politi M, Braca A, Morelli I, Della Loggia R. 2005. Extracts and constituents of *Lavandula multifida* with topical anti-inflammatory activity. *Phytomedicine* 12 (2005) 271–277. doi:10.1016/j.phymed.2004.02.007.
- Souri, F., Rakhshan, K., Erfani, S., Azizi, Y., Maleki, S., & Aboutaleb, N. (2019). Natural lavender oil (*Lavandula angustifolia*) exerts cardioprotective effects agasint myocardial infarction by targeting inflammation and oxidative stress. *Inflammopharmacology*, 27(4), 799–807.
- Sousa PJ, Linard CF, Azevedo-Batista D, Oliveira AC, Coelho-de-Souza AN, Leal-Cardoso JH.. 2009. Antinociceptive effects of the essential oil of *Mentha x villosa* leaf and its major constituent piperitenone oxide in mice. *Brazilian Journal of Medical and Biological Research* (2009) 42: 655-659.
- Stalińska, K., Guzdek, A., Rokicki, M., & Koj, A. (n.d.). Transcription factors as targets of the anti-inflammatory treatment. A cell culture study with extracts from some mediterranean diet plants. www.jpp.krakow.pl
- Sudaramoorthy, A., Shanmugam, G., & Shanmugam, N. (2021). Inhibitory effect of *Salvia coccinea* on inflammatory responses through NF-κB signaling pathways in THP-1 cells and acute rat diabetes mellitus. *Acta Histochemica*, 123(5) doi:10.1016/j.acthis.2021.151735

- Sun J., Sun P., Kang C., Zhang L., Guo L., Kou Y. 2022. Chemical composition and biological activities of essential oils from six Lamiaceae folk medicinal plants. *Frontiers in Plant Science* 13:919294. [https://doi: 10.3389/fpls.2022.919294](https://doi.org/10.3389/fpls.2022.919294).
- Sun, Z., Wang, H., Wang, J., Zhou, L., & Yang, P. (2014). Chemical composition and anti-inflammatory, cytotoxic and antioxidant activities of essential oil from leaves of *Mentha piperita* grown in China. *PLoS ONE*, 9(12). [doi.org/10.1371/journal.pone.0114767](https://doi.org/10.1371/journal.pone.0114767)
- Süntar, I., Nabavi, S.M., Barreca, D., Fischer, N., Efferth, T. (2018). Pharmacological and chemical features of *Nepeta* L. genus: Its importance as a therapeutic agent. *Phytotherapy Research*, 32, 185–198. [doi: 10.1002/ptr.5946](https://doi.org/10.1002/ptr.5946).
- Taarit, M.B., Msaada, K., Hosni, K., Chahed, T., Marzouk, B. (2010). Essential oil composition of *Salvia verbenaca* L. growing wild in Tunisia. *Journal of Food Biochemistry*, 34(1), pp. 142–151.
- Tadesse, S., Mazumder, A., Bucar, F., Veeresham, C., & Asres, K. (2011). Chemical composition and biological activities of the essential oil of *Plectranthus caninus* Roth. *Pharmacognosy Journal*, 3(26), 1–7. [doi.org/10.5530/pj.2011.26.1](https://doi.org/10.5530/pj.2011.26.1)
- Taheri, S., Khalifeh, S., Shajiee, H., & Ashabi, G. (2021). Dietary uptake of *Salvia macilenta* extract improves Nrf2 antioxidant signaling pathway and diminishes inflammation and apoptosis in amyloid beta-induced rats. *Molecular Biology Reports*, 48(12), 7667–7676. [doi.org/10.1007/s11033-021-06772-5](https://doi.org/10.1007/s11033-021-06772-5).
- Tang, Y. Q. N., Deng, J., Li, L., Yan, J., Lin, L. M., Li, Y. M., Lin, Y., & Xia, B. H. (2022). Essential oil from *Prunella vulgaris* L. as a valuable source of bioactive constituents: In vitro anti-bacterial, anti-viral, immunoregulatory, anti-inflammatory, and chemical profiles. *South African Journal of Botany*, 151, 614–627. [doi.org/10.1016/j.sajb.2022.10.029](https://doi.org/10.1016/j.sajb.2022.10.029)
- Taşkın T, Emin Çam M, Bulut G, Nur Hazar-Yavuz A, Kabasakal L, Bitiş L. (2018) Antioxidant and anti-inflammatory activities of *Phlomis pungens* and *Coridothymus capitatus*. *Marmara Pharmaceutical Journal*: 22(1), 80-85. [dx.doi.org/10.12991/mpj.2018.44](https://doi.org/10.12991/mpj.2018.44)
- Taşkın, T., Çam, M.E., Taşkın, D. et al. 2019. In vitro and In vivo biological activities and phenolic characterization of *Thymus praecox* subsp. *skorpilii* var. *skorpilii*. *Journal of Food Measurement and Characterization* (2019) 13:536–544 <https://doi.org/10.1007/s11694-018-9967-1>
- Taskin, T., Dogan, M., Cam, M. E., Sahin, T., & Senkardes, I. (2020). In vitro anti-urease, antioxidant, anticholinesterase, cytotoxic and in vivo anti-inflammatory potential of *Satureja cuneifolia* Ten. *Notulae Scientia Biologicae*, 12(2), 222–232. [doi.org/10.15835/nsb12210687](https://doi.org/10.15835/nsb12210687)

- Tepe, B., Cakir, A., & Sihoglu Tepe, A. (2016). Medicinal Uses, Phytochemistry, and Pharmacology of *Origanum onites* (L.): A Review. *Chemistry and Biodiversity* (Vol. 13, Issue 5, pp. 504–520). Wiley-VCH Verlag. <https://doi.org/10.1002/cbdv.201500069>
- Thawkar, B., Jawarkar, A. G., Kalamkar, P., Pawar, K., Kale, M. K. (2016). Phytochemical and pharmacological review of *Mentha arvensis*. *International Journal of Green Pharmacy*, 10(2), 71–76. [www.researchgate.net/publication/316256954](http://www.researchgate.net/publication/316256954)
- Tsioutsiou, E. E., Amountzias, V., Vontzalidou, A., Dina, E., Stevanović, Z. D., Cheilari, A., & Aligiannis, N. (2022). Medicinal plants used traditionally for skin related problems in the south balkan and east mediterranean Region—A review. *Frontiers in Pharmacology*, 13 doi:10.3389/fphar.2022.936047
- Tubon I, Zannoni A, Bernardini C, Salaroli R, Bertocchi M, Mandrioli R, Vinueza D, Antognoni F, Forni M. 2019. *In vitro* anti-inflammatory effect of *Salvia sagittata* ethanolic extract on primary cultures of porcine aortic endothelial cells. *Oxidative Medicine and Cellular Longevity* 2019:6829173. [https://doi: 10.1155/2019/6829173](https://doi.org/10.1155/2019/6829173)
- Ueda, H., Yamazaki, C., & Yamazaki, M. (2002). Luteolin as an anti-inflamamtory and anti-allergic constituent of *Perilla frutescens*. *Biological Pharmaceutical Bulletin*, 25(9), 1197–1202.
- Ulikhanyan, G., Galstyan, H., Dumanyan, K., Beglaryan, M., Poghosyan, G., Shekoyan, V., Ananikyan, H., Ananikyan, V., Goginyan, V., Ulikhanyan, G., Chichoyan, N., & Taschyan, S. (2022). The study of the biological activities of *Ziziphora clinopodioides*. *Brazilian Journal of Pharmaceutical Sciences*, 58. doi.org/10.1590/s2175-97902022e19331
- Ustuner, O., Anlas, C., Bakirel, T., ...Donmez, C., Koca-Caliskan, U. (2019). *In vitro* evaluation of antioxidant, anti-inflammatory, antimicrobial and wound healing potential of *Thymus sipyleus* Boiss. subsp. *rosulans* (Borbas) Jalas. *Molecules*, 24(18), 3353.
- Vairinhos, J., Miguel, M.G. (2020). Essential oils of spontaneous species of the genus *Lavandula* from Portugal: A brief review. *Zeitschrift fur Naturforschung - Section C Journal of Biosciences*, 75(78), pp. 233–245.
- Vazirian, F., Samadi, S., Abbaspour, M., ...Mohammadpour, A.H., Emami, S.A. (2022). Evaluation of the efficacy of *Thymus kotschyanus* extract as an additive treatment in patients with ulcerative colitis: a randomized double-blind placebo-controlled trial. *Inflammopharmacology*, 30(6), pp. 2145–2152
- Verano, J., González-Trujano, M. E., Déciga-Campos, M., Ventura-Martínez, R., & Pellicer, F. (2013). Ursolic acid from *Agastache mexicana* aerial parts produces antinociceptive activity involving TRPV1 receptors, cGMP and a serotonergic synergism. *Pharmacology Biochemistry and Behavior*, 110, 255–264. <https://doi.org/10.1016/j.pbb.2013.07.020>
- Vijayan, C., Murugan, K., Reji, S., & Nair, G. (2017). Screening biological activities of *Orthosiphon aristatus*: some observations. *International Journal of Advanced Research*, 5(12), 757–764. doi.org/10.21474/IJAR01/6016

- Villaseñor, I. M., Angelada, J., Canlas, A. P., & Echegoyen, D. (2002). Bioactivity studies on  $\beta$ -sitosterol and its glucoside. *Phytotherapy Research*, 16(5), 417–421. doi.org/10.1002/ptr.910
- Vladimir-Knežević, S., Cvijanović, O., Blažeković, B., Kindl, M., Štefan, M. B., & Domitrović, R. (2015). Hepatoprotective effects of *Micromeria croatica* ethanolic extract against CCl<sub>4</sub>-induced liver injury in mice. *BMC Complementary and Alternative Medicine*, 15(1). doi.org/10.1186/s12906-015-0763-8
- Vogl, S., Picker, P., Mihaly-Bison, J., Fakhrudin, N., Atanasov, A. G., Heiss, E. H., Wawrosch, C., Reznicek, G., Dirsch, V. M., Saukel, J., & Kopp, B. (2013). Ethnopharmacological in vitro studies on Austria's folk medicine - An unexplored lore *in vitro* anti-inflammatory activities of 71 Austrian traditional herbal drugs. *Journal of Ethnopharmacology*, 149(3), 750–771. doi.org/10.1016/j.jep.2013.06.007
- Vulganová, K., Maliar, T., Maliarová, M., Nemeček, P., Viskupičová, J., Balážová, A., & Sokol, J. (2019). Biologically valuable components, antioxidant activity and proteinase inhibition activity of leaf and callus extracts of *Salvia* sp. *Nova Biotechnologica et Chimica*, 18(1), 25-36. doi:10.2478/nbec-2019-0004
- Wan, J., Liu, M., Jiang, H. Y., Yang, J., Du, X., Li, X. N., Wang, W. G., Li, Y., Pu, J. X., & Sun, H. D. (2016). Bioactive ent-kaurane diterpenoids from *Isodon serra*. *Phytochemistry*, 130, 244–251. doi.org/10.1016/j.phytochem.2016.05.014
- Wang, M., Dai, H., Li, X., ...Wang, L., Xue, M. (2010). Structural elucidation of metabolites of tanshinone I and its analogue dihydrotanshinone I in rats by HPLC-ESI-MSn. *Journal of Chromatography B: Analytical Technologies in the Biomedical and Life Sciences*, 878(13-14), pp. 915–924.
- Wang, M., Wang, Y., Shi, L., Lu, Y., Zhu, H., Liang, L., & Sun, Z. L. (2022). A New Phenylpropanoid-Substituted Flavan-3-ol from Aerial Part of *Mentha longifolia*. *Chemistry of Natural Compounds*, 58(2), 237–239. doi.org/10.1007/s10600-022-03649-2
- Wang, X., Cheng, K., Liu, Z., Sun, Y., Zhou. L., Xu. M., Dai, X., Xiong, Y., Zhang, H. (2021). Bioactive constituents of *Mosla chinensis*-cv. Jiangxiangru ameliorate inflammation through MAPK signaling pathways and modify intestinal microbiota in DSS-induced colitis mice. *Phytomedicine* 93,153804. doi: 10.1016/j.phymed.2021.153804.
- Wang, Y. Y., Lin, S. Y., Chen, W. Y., Liao, S. L., Wu, C. C., Pan, P. H., Chou, S. T., & Chen, C. J. (2017). *Glechoma hederacea* extracts attenuate cholestatic liver injury in a bile duct-ligated rat model. *Journal of Ethnopharmacology*, 204, 58–66. doi.org/10.1016/j.jep.2017.04.011
- Wang, Y., Shao, Z., Song, C., ...Zhou, G., Meng, D. (2023). *Clinopodium chinense* Kuntze ameliorates dextran sulfate sodium-induced ulcerative colitis in mice by reducing systematic inflammation and regulating metabolism. *Journal of Ethnopharmacology*, 309, 116330.

- Wang, Z., Hwang, S.H., Guillen Quispe, Y.N., Gonzales Arce, P.H., Lim, S.S. (2017). Investigation of the antioxidant and aldose reductase inhibitory activities of extracts from Peruvian tea plant infusions. *Food Chemistry*, 231, 222–230. <http://dx.doi.org/10.1016/j.foodchem.2017.03.107>.
- Wu, H.-Y., Wang, W.-G., Du, X., Yang, J., Pu, J.-X., Sun, H.-D. (2015). Six new cytotoxic and anti-inflammatory 11, 20-epoxy-ent-kaurane diterpenoids from *Isodon wikstroemioides*. *Chinese Journal of Natural Medicines*, 13(5), 383–389.
- Wu, H.-Y., Wang, W.-G., Jiang, H.-Y., Du, X., Li, X.-N., Pu, J.-X., Sun, H.-D. (2014). Cytotoxic and anti-inflammatory ent-kaurane diterpenoids from *Isodon wikstroemioides*. *Fitoterapia*, 98, 192–198. <http://dx.doi.org/10.1016/j.fitote.2014.08.012>.
- Wu, S.J., Chan, H.H., Hwang, T.L., Qian, K., Morris-Natschke, S., Lee, K.H., Tian-Shung Wu, T.S. 2010. Salviatalin A and salvitrijudin A, two diterpenes with novel skeletons from roots of *Salvia digitaloides* and anti-inflammatory evaluation. *Tetrahedron Letters* 51(32):4287-4290. DOI: <https://10.1016/j.tetlet.2010.06.048>.
- Wu, Y., Wang, Y., Liu, X., Jiang, L., Guli, A., Sailike, J., Sun, X., Abuduwaili, N., Tuoliuhan, H., Maney, K., & Nabi, X. (2020). *Ziziphora clinopodioides* flavonoids based on network pharmacology attenuates atherosclerosis in rats induced by high-fat emulsion combined with vitamin D3 by down-regulating VEGF/AKT/NF-κB signaling pathway. *Biomedicine and Pharmacotherapy*, 129. [doi.org/10.1016/j.biopha.2020.110399](https://doi.org/10.1016/j.biopha.2020.110399).
- Xia F, Wu CY, Yang XW, Li X, Xu G. 2015. Diterpenoids from the Roots of *Salvia yunnanensis*. *Nat. Prod. Bioprospect.* (2015) 5:307–312. [doi.10.1007/s13659-015-0080-4](https://doi.org/10.1007/s13659-015-0080-4).
- Xiang, Z., Wu, X., Liu, X., Jin, Y. (2014). Glaucocalyxin A: a review. *Natural Product Research*, 28:24, 2221-2236. <https://doi.org/10.1080/14786419.2014.934235>.
- Xie, Q., Wang, Y., & Zou, G. L. (2022). Protective effects of lavender oil on sepsis-induced acute lung injury via regulation of the NF-κB pathway. *Pharmaceutical Biology*, 60(1), 968–978. [doi.org/10.1080/13880209.2022.2067570](https://doi.org/10.1080/13880209.2022.2067570)
- Xing, H., An, L., Song, Z., Li, S., Wang, H., Wang, C., Zhang, J., Tuerhong, M., Abudukeremu, M., Li, D., Lee, D., Xu, J., Lall, N., & Guo, Y. (2020). Anti-Inflammatory ent-Kaurane Diterpenoids from *Isodon serra*. *Journal of Natural Products*, 83(10), 2844–2853. <https://doi.org/10.1021/acs.jnatprod.9b01281>
- Xing, J., Peng, K., Cao, W., Lian, X., Wang, Q., & Wang, X. (2013). Effects of total flavonoids from *Dracocephalum moldavica* on the proliferation, migration, and adhesion molecule expression of rat vascular smooth muscle cells induced by TNF-α. *Pharmaceutical Biology*, 51(1), 74–83. [doi.org/10.3109/13880209.2012.711839](https://doi.org/10.3109/13880209.2012.711839).
- Xu G, Peng LY, Lu L, Weng ZY, Zhao Y, Li XL, Zhao QS, Sun HD. 2005. Two New Abietane Diterpenoids from *Salvia yunnanensis*. *Planta Med* 2006; 72: 84±86. DOI 10.1055/s-2005-873184.

- Yan, D. (2016). Substitutability of *Prunella vulgaris* L. stem, leaf and ear based on HPLC-ESI-MS analysis and anti-inflammatory and antioxidant activity. *Chinese Pharmaceutical Journal*, 24, 792–797. [pesquisa.bvsalud.org/portal/resource/pt/wpr-859105](http://pesquisa.bvsalud.org/portal/resource/pt/wpr-859105)
- Yang, E.-L., Hou, Y., Ma, G.-X., Zou, L.-J., Xu, X.-D., Wu, H.-F., Yang, J.-S., Wei, H.-W., Fan, C.-Z., Sun, Z.-C. Shi, L.-L. (2022). Abietane-Type diterpenoids from *Nepeta bracteata* Benth. and their anti-inflammatory activity. *Frontiers in Chemistry*, 10, 944972. doi: 10.3389/fchem.2022.944972.
- Yang, F., Pu, H.-Y., Yaseen, A., Chen, B., Li, F. Gu, Y.-Ch., Shen, X.-F., Wang, M.-K. Guo, D.-L., Wang, L. (2021). Terpenoid and phenolic derivatives from the aerial parts of *Elsholtzia rugulosa* and their anti-inflammatory activity. *Phytochemistry*, 181: 112543. <https://doi.org/10.1016/j.phytochem.2020.112543>.
- Yang, N., Zou, C., Luo, W., Xu, D., Wang, M., Wang, Y., Wu, G., Shan, P., & Liang, G. (2022). Sclareol attenuates angiotensin II -induced cardiac remodeling and inflammation via inhibiting MAPK signaling. *Phytotherapy Research*, 1-14 doi.org/10.1002/ptr.7635
- Yang, Z., Qi, J., Ping, D., Sun, X., Tao, Y., Liu, C., & Peng, Y. (2022). *Salvia miltiorrhiza* in thorax and abdominal organ fibrosis: A review of its pharmacology. *Frontiers in Pharmacology* (Vol. 13). Frontiers Media S.A. doi.org/10.3389/fphar.2022.999604.
- Yazbek, P.B., Tezoto L., Cassas F., Rodrigues E.. 2016. Review Plants used during maternity, menstrual cycle and other women's health conditions among Brazilian cultures. *Journal of Ethnopharmacology* 179 (2016) 310–331. [dx.doi.org/10.1016/j.jep.2015.12.054](https://doi.org/10.1016/j.jep.2015.12.054)
- Yi, W., Chen, R., Xie, F., Xu, C., & Tian, W. (2022). Anti-inflammatory and immunomodulatory properties of *Mentha piperita* green-formulated gold nanoparticles and its effect on ovalbumin-induced asthma and lung pathological changes in rats. *Journal of Experimental Nanoscience*, 17(1), 163–172. doi.org/10.1080/17458080.2022.2033730
- Yin, Q.-Q., Liu, C.-X., Wu, Y.-L., Wu, S.-F., Wang, Y., Zhang, X., Hu, X.-J., Pu, J.-X., Lu, Y., Zhou, H.-C., Wang, H.-L., Nie, H., Sun, H.-D., & Chen, G.-Q. (2013). Preventive and Therapeutic Effects of Adenanthin on Experimental Autoimmune Encephalomyelitis by Inhibiting NF-κB Signaling. *The Journal of Immunology*, 191(5), 2115–2125. doi.org/10.4049/jimmunol.1203546
- Yu, Y., Xing, N., Xu, X., ...Sun, G., Sun, X. (2019). Tournefollic acid B, derived from *Clinopodium chinense* (Benth.) Kuntze, protects against myocardial ischemia/reperfusion injury by inhibiting endoplasmic reticulum stress-regulated apoptosis via PI3K/AKT pathways. *Phytomedicine*, 52, pp. 178–186.
- Yu, Z.-Y., Liang, Y.-G., Xiao, H., Shan, Y.-J., Dong, B., Huang, R., Fu, Y.-L., Zhao, Z.-H., Liu, Z.-Y., Zhao, Q.-S., Wang, S.-Q., Chen, J.-P., Mao, B.-Z., Cong, Y.-W. (2007). Melissoidesin G, a diterpenoid purified from *Isodon melissoides*, induces leukemic-cell apoptosis through induction of redox imbalance and exhibits synergy with other anticancer agents. *International Journal of Cancer*, 121, 2084–2094. doi: 10.1002/ijc.22945.



- Yuan, F., Liu, R., Hu, M., Sun, Y., He, J. JAX2, an ethanol extract of *Hyssopus cuspidatus* Boriss., can prevent bronchial asthma by inhibiting MAPK/NF-κB inflammatory signaling. *Phytomedicine*, 57, pp. 305–314.
- Zam, W., Quispe, C., Sharifi-Rad, J., López, M. D., Schoebitz, M., Martorell, M., Sharopov, F., Fokou, P. V. T., Mishra, A. P., Chandran, D., Kumar, M., Chen, J. T., & Pezzani, R. (2022). An Updated Review on The Properties of *Melissa officinalis* L.: Not Exclusively Anti-anxiety. In *Frontiers in bioscience* 14(2). doi.org/10.31083/j.fbs1402016
- Zargar, O. A., Bashir, R., Ganie, S. A., & Hamid, R. (2019). The effect of *Elsholtzia densa* methanolic extract modulates inflammation in vitro and in vivo. *Oriental Pharmacy and Experimental Medicine*, 19(1), 49–58. doi.org/10.1007/s13596-018-0346-6.
- Zarshenas, M. M., & Krenn, L. (2015). Phytochemical and pharmacological aspects of *Salvia mirzayanii* Rech. f. & Esfand. *Journal of Evidence-Based Complementary and Alternative Medicine*, 20(1), 65–72. https://doi.org/10.1177/2156587214553938
- Zengin, G., Ferrante, C., Orlando, G., Zheleva-Dimitrova, D., Gevrenova, R., Recinella, L., Chiavaroli, A., Leone, S., Brunetti, L., Aumeeruddy, M.Z., Aktumsek, A., Mahomoodally, M.F., Angelini, P., Covino, S., Venanzoni, R., Tirillini, B., Menghini, L. (2019). Chemical profiling and pharmaco-toxicological activity of *Origanum sipyleum* extracts: Exploring for novel sources for potential therapeutic agents. *Journal of Food Biochemistry*, 43, e13003. doi: https://doi.org/10.1111/jfbc.13003.
- Zhang, J., Yan, X., Xu, S., Wang, D., Liu, H. (2021) High-performance thin-layer chromatographic quantification of four active compounds in total flavonoids of *Ziziphora clinopodioides* Lam. and TLC–DPPH test for screening antioxidant components. *JPC-J Planar Chromat* 34, 481–492. doi.org/10.1007/s00764-021-00147-z
- Zhang, M., Chen, M., Hou, Y., Fan, C., Wei, H., Shi, L., Ma, G., Zhang, J. (2021). Inflammatory and cytotoxic activities of Abietane terpenoids from *Nepeta bracteata* Benth.. *Molecules*, 26, 5603. https://doi.org/10.3390/molecules26185603.
- Zhang, M., Hwang, E., Lin, P., Gao, W., Ngo, H. T. T., & Yi, T. H. (2018b). *Prunella vulgaris* L. Exerts a Protective Effect Against Extrinsic Aging Through NF-κB, MAPKs, AP-1, and TGF-β/Smad Signaling Pathways in UVB-Aged Normal Human Dermal Fibroblasts. *Rejuvenation Research*, 21(4), 313–322. doi.org/10.1089/rej.2017.1971
- Zhang, Q., Porto, N.M., Guilhaon, C.C., ...Fernandes, P.D., Boylan, F. (2021). Pharmacognostic study on *Elsholtzia ciliata* (Thumb.) Hyl.: Anatomy, phytochemistry and pharmacological activities. *Pharmaceuticals*, 14(11), 1152.
- Zhang, Y. Y., Jiang, H. Y., Liu, M., Hu, K., Wang, W. G., Du, X., Li, X. N., Pu, J. X., & Sun, H. D. (2017). Bioactive ent-kaurane diterpenoids from *Isodon rubescens*. *Phytochemistry*, 143, 199–207. doi.org/10.1016/j.phytochem.2017.08.009

- Zhang, Y., Liu, J., Jia, W., Zhao, A., Zhang, T. L., Liu, Y., Jia, J., Zhao, W., & Li, A. (2005). Distinct immunosuppressive effect by *Isodon serra* extracts. *International Immunopharmacology* (Vol. 5). <http://www.sciencedirect.com/science/article/pii/S1567576905001803>
- Zhang, Y., Wang, K., Chen, H., He, R., Cai, R., Li, J., Zhou, D., Liu, W., Huang, X., Yang, R., Deng, S., Li, J., & Guan, X. (2018). Anti-inflammatory lignans and phenylethanoid glycosides from the root of *Isodon ternifolius* (D.Don) Kudô. *Phytochemistry*, 153, 36–47. doi.org/10.1016/j.phytochem.2018.05.017
- Zhao, J., Xu, F., He, J.H., Gu, Z.Y., Ma, L. (2013). [Study on chemical constituents of *Hyssopus cuspidatus*. Zhong yao cai = Zhongyaocai = *Journal of Chinese medicinal materials*, 36(1), pp. 54–57.
- Zhao, J., Xu, F., Huang, H., Ji, T., Li, C., Tan, W., Chen, Y., Affiliations, L. M., & Pharm Sci, P. J. (2015). Evaluation on bioactivities of total flavonoids from *Lavandula angustifolia*. *Pakistan Journal of Pharmaceutical Sciences*, 28(4), 1245–1251. pubmed-ncbi-nlm-nih-gov.pbidi.unam.mx:2443/26142514/
- Zhao, J.; Xu, L.; Jin, D.; Xin, Y.; Tian, L.;Wang, T.; Zhao, D.; Wang, Z.;Wang, J. 2022. Rosmarinic acid and related dietary supplements: potential applications in the prevention and treatment of Cancer. *Biomolecules* 12, 1410. <https://doi.org/10.3390/biom12101410>
- Zheng, X. Q., Song, L. X., Qiu, H., Yang, Y. B., Han, Z. Z., Wang, Z. T., & Gu, L. H. (2022). Novel phenolic and diterpenoid compounds isolated from the fruit spikes of *Prunella vulgaris* L. and their anti-inflammatory activities. *Phytochemistry Letters*, 49, 60–64. doi.org/10.1016/j.phytol.2022.03.005
- Zhong, J., Muhammad, N., Yang, X. Li, J. (2022). Antimicrobial, antioxidant, anti-inflammatory activities of eight essential oils obtained from traditional chinese medicines using supercritical fluid extraction coupled molecular distillation. *Journal of Essential Oil-Bear Plants* 25 (5) 1145 – 1158.
- Zhong, J., Muhammad, N., Yang, X., Li, J. (2022). Antimicrobial, antioxidant, anti-inflammatory activities of eight essential oils obtained from traditional Chinese medicines using supercritical fluid extraction coupled molecular distillation. *Journal of Essential Oil Bearing Plants*, 25:5, 1145-1158, doi: 10.1080/0972060X.2022.2142484.
- Zhong, Y., Huang, Y., Santoso, M. B., & Wu, L.D. (2015). Sclareol exerts anti-osteoarthritic activities in interleukin-1 $\beta$ -induced rabbit chondrocytes and a rabbit osteoarthritis model. *International Journal of Clinical and Experimental Pathology* 8(3), 2365-2374.
- Zhou, L., Sun, L., Wu, H., Zhang, L., Chen, M., Liu, J., & Zhong, R. (2013). Oridonin ameliorates lupus-like symptoms of MRLlpr/lpr mice by inhibition of B-cell activating factor (BAFF). *European Journal of Pharmacology*, 715(1–3), 230–237. <https://doi.org/10.1016/j.ejphar.2013.05.016>

- Zhu, C.-S., Liu, K., Wang, J.-L., Li, J.-F., Liu, M.-F., Hao, N., Lin, Y.-X., Xiao, Z.-F. (2018). Antioxidant activities and hepatoprotective potential of *Dracocephalum rupestre* Hance extract against CCl<sub>4</sub>-induced hepatotoxicity in Kunming mice. *Journal of Food Biochemistry*, 42:e12484. <https://doi.org/10.1111/jfbc.12484>
- Ziaei, A., Hoppstädter, J., Kiemer, A. K., Ramezani, M., Amirghofran, Z., & Diesel, B. (2015). Inhibitory effects of teuclatriol, a sesquiterpene from *Salvia mirzayanii*, on nuclear factor- $\kappa$ B activation and expression of inflammatory mediators. *Journal of Ethnopharmacology*, 160, 94–100. <https://doi.org/10.1016/j.jep.2014.10.041>
- Zotsenko, L., Kyslychenko, V., Kalko, K., & Drogovoz, S. (2021). The study of phenolic composition and acute toxicity, anti-inflammatory and analgesic effects of dry extracts of some *Elsholtzia* genus (Lamiaceae) species. *Archives*, 2, 637–649. <http://pharmacologyonline.silae.it>
- Zou, Y. H., Zhao, L., Xu, Y. K., Bao, J. M., Liu, X., Zhang, J. S., Li, W., Ahmed, A., Yin, S., & Tang, G. H. (2018). Anti-inflammatory sesquiterpenoids from the Traditional Chinese Medicine *Salvia plebeia*: Regulates pro-inflammatory mediators through inhibition of NF- $\kappa$ B and Erk1/2 signaling pathways in LPS-induced Raw 264.7 cells. *Journal of Ethnopharmacology*, 210, 95–106. [doi.org/10.1016/j.jep.2017.08.034](https://doi.org/10.1016/j.jep.2017.08.034)
- Zou, Z. Q., Ning, D. S., Liu, Y., Fu, Y. X., Li, L. C., & Pan, Z. H. (2022). Five new germacrane sesquiterpenes with anti-inflammatory activity from *Salvia petrophila*. *Phytochemistry Letters*, 47, 111–114. [doi.org/10.1016/j.phytol.2021.12.001](https://doi.org/10.1016/j.phytol.2021.12.001)
- Zoubi, Y. E., El, L., Sidi, M., Ben, M., Boukhira, S., Ben, S. M., & Farah, A. (2016). Phytochemical Screening, Anti-inflammatory Activity and Acute Toxicity of Hydro-ethanolic, Flavonoid, Tannin and Mucilage Extracts of *Lavandula stoechas* L. from Morocco Valorisation des plantes médicinales View project pharmacological activities of plants extracts View project. *Article in International Journal of Pharmacognosy and Phytochemical Research* 8(1), 31-37.[www.researchgate.net/publication/287935765](http://www.researchgate.net/publication/287935765)
- Zuo, J., Zhang, T. H., Xiong, L., Huang, L., Peng, C., Zhou, Q. M., & Dai, O. (2022). Two Pairs of 7,7'-Cyclolignan Enantiomers with Anti-Inflammatory Activities from *Perilla frutescens*. *Molecules*, 27(18). [doi.org/10.3390/molecules27186102](https://doi.org/10.3390/molecules27186102)
- Zuzarte M, Francisco V, Neves B, Liberal J, Cavaleiro C, Canhoto J, Salgueiro L, Cruz MT. (2022). *Lavandula viridis* L Hér. Essential Oil Inhibits the Inflammatory Response in Macrophages Through Blockade of NF-KB Signaling Cascade. *Front. Pharmacol.* 12:695911. doi: 10.3389/fphar.2021.695911
- Zuzarte, M., Alves-Silva, J.M., Alves, M., ...Salgueiro, L., Cruz, M.T. (2018). New insights on the anti-inflammatory potential and safety profile of *Thymus carnosus* and *Thymus camphoratus* essential oils and their main compounds. *Journal of Ethnopharmacology*, 2018, 225, pp. 10–17
- Zuzarte, M., Gonçalves, M. J., Cavaleiro, C., Cruz, M. T., Benzarti, A., Marongiu, B., Maxia, A., Piras, A., & Salgueiro, L. (2013). Antifungal and anti-inflammatory potential of *Lavandula stoechas* and *Thymus herbabarona* essential oils. *Industrial Crops and Products*, 44, 97–103. [doi.org/10.1016/j.indcrop.2012.11.002](https://doi.org/10.1016/j.indcrop.2012.11.002).
