# Supplementary material for: Ethnobotanical, Phytochemical, and Pharmacological Properties of the Subfamily Nepetoideae (Lamiaceae) in Inflammatory Diseases
Source: MDPI journal article supplement (doi:10.3390/plants12213752), 2023-11-02
Supplement: s1 [file s1]

**Table S3.** Phytochemistry related to inflammatory processes in species of the Nepetoideae (Lamiaceae) subfamily.

| Specie                                                                     | Plant part                      | Phytochemistry                                                                                                                                                                                                                                                                                                                                                                                                                                                                                                                                                | Reference                                                                                    |
|----------------------------------------------------------------------------|---------------------------------|---------------------------------------------------------------------------------------------------------------------------------------------------------------------------------------------------------------------------------------------------------------------------------------------------------------------------------------------------------------------------------------------------------------------------------------------------------------------------------------------------------------------------------------------------------------|----------------------------------------------------------------------------------------------|
| <i>Agastache mexicana</i><br>Lint. & Epling                                | Aerial parts;<br>inflorescences | Ursolic acid, limonene                                                                                                                                                                                                                                                                                                                                                                                                                                                                                                                                        | González-Ramírez et al., 2012;<br>Verano et al. 2013; González-<br>Ramírez et al., 2021      |
| <i>Agastache rugosa</i><br>Kuntze                                          | Aerial parts; leaves            | Rosmarinic acid                                                                                                                                                                                                                                                                                                                                                                                                                                                                                                                                               | Kim et al., 2017; Lim et al., 2017;<br>Lee et al., 2020                                      |
| <i>Asterohyptis stellulata</i><br>(Benth.) Epling                          | Aerial parts                    | 2-(3,4-dihydroxyphenil)-5,7-dihydroxy-3-[2,3,4-trihydroxy-5-(hydroxymethyl)<br>cyclohexoxyl]; chromen-4-one; quercetin-3-O-glicoside; 2-O-(4-hydroxy-cinnamoyl), 4'-O-<br>D-glucopyranoside.                                                                                                                                                                                                                                                                                                                                                                  | Álvarez-Santos et al., 2022                                                                  |
| <i>Cedronella canariensis</i><br>(L.) Webb & Berthel.                      | Flowers                         | Cedronelle, <i>d</i> -pinocarvone, tyrosol-derived fatty acids, $\beta$ -sitosterol.                                                                                                                                                                                                                                                                                                                                                                                                                                                                          | Lopez-García et al., 1991                                                                    |
| <i>Clinopodium</i><br><i>bolivianum</i> (Benth.)<br>Kuntze                 | Aerial extract                  | Phenolic compounds and sugars.                                                                                                                                                                                                                                                                                                                                                                                                                                                                                                                                | Mohanty et al., 2017                                                                         |
| <i>Clinopodium chinense</i><br>(Benth.) Kuntze                             | Whole parts                     | Naringenin, rutin,<br>hesperidin, quercitrin, kaempferitrin, caffeic acid, quercetol, kaempferol, ponciretin 7-O-<br>$\alpha$ -L-rhamnopyranosyl-(1→6)- $\beta$ -D-glucopyranoside, naringenin 7-O- $\alpha$ -L-<br>rhamnopyranosyl-(1→6)- $\beta$ -D-glucopyranoside, 3-O-{ $\beta$ -D-glucopyranosyl-(1→2)-[ $\beta$ -D-<br>glucopyranosyl-(1→3)]- $\beta$ -D-fucopyranosyl}-saikogenin F, 3-O-{ $\beta$ -D-glucopyranosyl-(1→2)-<br>[ $\beta$ -D-glucopyranosyl-(1→3)]- $\beta$ -D-fucopyranosyl}-21 $\beta$ -hydroxysaikogenin F, tournefoliac<br>acid B. | Yu et al., 2019; Kim et al., 2020; Li<br>et al., 2020; Li et al., 2022; Wang et<br>al., 2023 |
| <i>Clinopodium</i><br><i>polycephalum</i> (Vaniot)<br>C.Y. Wu & S.J. Hsuan | Root and stem                   | Saturool I; 3 $\beta$ -22, 25-dihydroxy-tirucalla-7, 23-dieno;maslinic acid; 2 $\alpha$ , 3 $\alpha$ -dihydroxyolean-<br>12-en-28-oic acid; hederagenin; 2 $\alpha$ , 3 $\alpha$ -dihydroxyursolic acid; alphitolic acid                                                                                                                                                                                                                                                                                                                                      | Liu et al., 2022                                                                             |
| <i>Clinopodium</i><br><i>tomentosum</i> (Kunth)                            | Aerial parts                    | Rosmarinic acid; hesperidin                                                                                                                                                                                                                                                                                                                                                                                                                                                                                                                                   | Tubon et al., 2020.                                                                          |
| <i>Clinopodium vulgare</i> L.                                              | Flowers                         | Rosmarinic acid; neochlorogenic acid; catechin; chlorogenic acid, quercetin apigenin,<br>caffeic acid                                                                                                                                                                                                                                                                                                                                                                                                                                                         | Petrova et al., 2023; Dobrev, H.P.<br>2021; Amirova et al., 2019; Burk et<br>al., 2009.      |

| Specie                                    | Plant part                      | Phytochemistry                                                                                                                                                                                                                                                                                                                                                                                                                                                                                                                                                                                                                                                                                                                                                                                                                                     | Reference                                                                                          |
|-------------------------------------------|---------------------------------|----------------------------------------------------------------------------------------------------------------------------------------------------------------------------------------------------------------------------------------------------------------------------------------------------------------------------------------------------------------------------------------------------------------------------------------------------------------------------------------------------------------------------------------------------------------------------------------------------------------------------------------------------------------------------------------------------------------------------------------------------------------------------------------------------------------------------------------------------|----------------------------------------------------------------------------------------------------|
| <i>Coleus scutellarioides</i> (L.) Benth. | Leaves                          | Phytol, germacrene-d, caryophyllene, neofitadien, $\delta$ -cadinene, $\alpha$ -humulene; 6, 10, 14-trimethyl-2-pentadecanone; copaene, (-) caryophyllene oxide, $\alpha$ -selinene, methyl Eugenol, Octadecane, $\alpha$ -cadinol, 1,2-dimethyl-3-ethylbenzene, nonadecane, 1,3-diisopropenyl-6-methyl-cyclohexene, $\beta$ -sesquiphellandrene, dokosan, vitamin A aldehyde, (+)-Aromadendrene, nerolidol, acetamide, $\alpha$ -calacorene, torreyol, 9-octadecenoic acid, 7-octene-4-ol, 1,1'-oxybis-dodecane, trimethyl-tetrahydronaphthalene, 2-methyl-4-(1-methyl ethyl-2-cyclohexenone, 1-(3,7-dimethyl-1-octenyl)-cyclopropanol, 5-benzofuran acetic acid, 6, 10-dimethyl-2-undecanone, $\alpha$ -cubebene, 1-(1-oxo-15-tetracocenil)-pyrrolidine, heneiosen, linalool, tetracosahexaene, neomenthol, heptacosane, olealdehyde, isophytol. | Mustaricihie et al., 2017; Mustaricihie et al., 2022.                                              |
| <i>Collinsonia canadensis</i> L.          | Aerial parts                    | Thymol; carvacrol                                                                                                                                                                                                                                                                                                                                                                                                                                                                                                                                                                                                                                                                                                                                                                                                                                  | Mahomoodally et al., 2021                                                                          |
| <i>Dracocephalum heterophyllum</i> Benth. | Whole plant                     | oleanolic acid, ursolic acid, pomolic acid, 2 $\alpha$ - hydroxyl ursolic acid, apigenin-7-O-rutinoside, luteolin, diosmetin, rosmarinic acid, methyl rosmarinate., dehydrodipine-9- $\beta$ -D-glucoside, verbascoside.                                                                                                                                                                                                                                                                                                                                                                                                                                                                                                                                                                                                                           | Shi et al. 2016; *Bian et al., 2020                                                                |
| <i>Dracocephalum forrestii</i> W.W. Sm.   | Whole plant                     | 4-hydroxy-3-methoxyphenylethanol-8-O-[(6-O-syringoyl)- $\beta$ -D-glucopyranoside]; 3,4,5-trimethoxyphenylethanol $\beta$ -D-glucopyranoside; 4-O-[ $\beta$ -D-glucopyranosyl-(1 $\rightarrow$ 3)- $\alpha$ -L-rhamnopyranosyl]phenylethylcinnamamide; 9''-O-n-butyl lithospermate                                                                                                                                                                                                                                                                                                                                                                                                                                                                                                                                                                 | Li et al., 2009                                                                                    |
| <i>Dracocephalum kotschy</i> Boiss.       | Aerial parts and leafy branches | Apigenin                                                                                                                                                                                                                                                                                                                                                                                                                                                                                                                                                                                                                                                                                                                                                                                                                                           | Sandraei et al. 2017; Kalantar et al., 2018; Hosseini-Sharifabad et al, 2021; Minaian et al., 2021 |
| <i>Dracocephalum taliense</i> Forrest     | Root                            | 12-methoxy-18-hydroxy-sugiol; 2 $\alpha$ ,3 $\alpha$ -dihydroxy-11 $\alpha$ ,12 $\alpha$ -epoxi-urs-28,13 $\beta$ -olide; sugiol; abieta-8,11,13-triene; dehydroabietane; ferruginol; cryptojaponol; inuroyleanol; callitrisic acid; 11,14-dihydroxy-12,19-dimethoxy-7-oxo-8,11,13-abietatrien-19,20-olide; totarol; 7 $\alpha$ -hydroxytotarol; semperviol; cyclocoulterone; <i>E</i> -ergosta-6,9,22-triene-3 $\beta$ ,5 $\beta$ ,8 $\alpha$ -triol; (22 <i>E</i> )-ergosta-6,22-diene-3 $\beta$ ,5 $\beta$ ,8 $\alpha$ -triol; estigmast-4-en-6 $\beta$ -ol-3-one                                                                                                                                                                                                                                                                               | Deng et al., 2018                                                                                  |
| <i>Dracocephalum moldavica</i> L.         | Aerial parts                    | Tilianine; oleanolic acid; Dracocefalumoids A-E, uncinatone; rosmarinic acid; caffeic acid; feluric acid; luteolin-7-O- $\beta$ -D-glucuronide; tilianine; cosmosiin; apigenin-7-O- $\beta$ -D-glucuronide; chrysoeriol-7-O- $\beta$ -D-glucuronide; apigenin-7-O- $\beta$ -D-(6''-O-malonyl) glucoside; acacetin-7-O- $\beta$ -D-glucuronide; acacetin-7-O- $\beta$ -D-(6''-malonyl) glucoside                                                                                                                                                                                                                                                                                                                                                                                                                                                    | Xing et al., 2013; Shen et al., 2019; Kim et al., 2021; Nie et al., 2021; Sheychenko et al., 2021  |

| Specie                                          | Plant part           | Phytochemistry                                                                                                                                                                                                                                                                                                                                                                                                                                                                                                                                                                                                                                                                                                                                                                                                                                                                                                                              | Reference                                                                                                                                        |
|-------------------------------------------------|----------------------|---------------------------------------------------------------------------------------------------------------------------------------------------------------------------------------------------------------------------------------------------------------------------------------------------------------------------------------------------------------------------------------------------------------------------------------------------------------------------------------------------------------------------------------------------------------------------------------------------------------------------------------------------------------------------------------------------------------------------------------------------------------------------------------------------------------------------------------------------------------------------------------------------------------------------------------------|--------------------------------------------------------------------------------------------------------------------------------------------------|
| <i>Dracocephalum palmatum</i> Stephan ex Willd. | Aerial parts         | caffeic acid, 3-O-caffeoylquinic acid, rosmarinic acid, salvianolic acid B, caftaric acid, cichoric acid, umbelliferone, aesculetin, apigenin, cosmosiin, apigenin-7-O-β-D-glucuronopyranoside, isorhoifolin, luteolin, cynaroside, luteolin-7-O-β-D-glucuronopyranoside, luteolin-4-O-β-D-glucopyranoside, scolymoside, naringenin, naringenin-7-O-β-D-glucopyranoside, eriodictyol, eriodictyol-7-O-β-D-glucopyranoside, ursolic acid, oleanolic acid.                                                                                                                                                                                                                                                                                                                                                                                                                                                                                    | Olennikov et al. 2013; Andreyeva et al. 2020; Chirikova et al. 2021                                                                              |
| <i>Dracocephalum rupestre</i> Hance             | Whole plant          | Eriodictyol, Phenolic and flavonoid compounds.                                                                                                                                                                                                                                                                                                                                                                                                                                                                                                                                                                                                                                                                                                                                                                                                                                                                                              | Ferreira et al. 2016; Zhu et al. 2017                                                                                                            |
| <i>Elsholtzia blanda</i> Benth.                 | Whole plant          | 5, 5'-dihydroxy-7-methoxy-6,8,3'', 3''-tetramethylpiran-(3', 4')flavone; 5, 5'-dihydroxy-7-(α-methyl)butyroxyl-6,8,3'',3''-tetramethylpiran(3',4')-flavone; 5, 5'-dihydroxy-6, 7-methylenedioxy-8,3'',3''-trimethylpyran(3',4')-flavone.                                                                                                                                                                                                                                                                                                                                                                                                                                                                                                                                                                                                                                                                                                    | Zheng et al., 2001                                                                                                                               |
| <i>Elsholtzia ciliata</i> (Thunb.) Hyl.         | Leaves; aerial parts | Ursolic acid, Oroxylin A; caffeic acid, luteolin, apigetrin, rosmarinic acid, linarin, luteoloside, apigenin, kumatakenin; rutin, hyperoside, quercitrin, avicularin, chlorogenic acid, p-coumaric acid, luteolin-7-O-glucoside, apigenin-7-O-glucoside, diosmetin. vitexin, pedalin, luteolin-7-O-β-D-glucopyranoside, apigenin-5-O-β-D-glucopyranoside, apigenin-7-O-β-D-glucopyranoside chrysoeriol-7-O-β-D-glucopyranoside, 7,3-methoxy luteolin-6-O-β-D-glucopyranoside, 5,6,4'-trihydroxy-7,3'-dimethoxyflavone,5-hydroxy-6,7-dimethoxyflavone, 4-(E)-caffeoyl-L-threonic acid, 4-O-(E)-p-coumaroyl-L-threonic acid, α-linolenic acid; Vitexina, pedalina, lueolin, negletein, linarin, apigenin, apigetrin, diosmetin; butin; isokanin; sulfuretin, neoisoliquiritin, kumatakenin; orientin; isoorientin; swertisin; chrysoeriol; osmundacetone; gnaphaliin C; everlastoside; danshensu; pinoresinol; terpinolene; elsholtzia ketone | Wang et al., 2022; Zhang et al., 2021; Zotsenko et al., 2021; Nguyen et al., 2021; Pudziuvelyte et al., 2020; Kim et al., 2016; Kim et al., 2011 |
| <i>Elsholtzia densa</i> Benth.                  | Aerial parts         | Quercetin, 3-glycoside, apigenin, 7-(2''-acetyl-6''-methylglucuronide), betulinic acid.                                                                                                                                                                                                                                                                                                                                                                                                                                                                                                                                                                                                                                                                                                                                                                                                                                                     | Zargar et al., 2019                                                                                                                              |
| <i>Elsholtzia rugulosa</i> Hemsl.               | Aerial parts         | (±)-rugulolides A-C, rugulolide D. luteolin, luteolin-3-O-β-D-glucopyranoside, luteolin-7-O-β-D-glucopyranoside, quercetin-3-O-β-D-glucopyranoside, quercetin-3-O-β-D-glucopyranoside, apigenin, apigenin-4'-O-α-D-glucopyranoside, apigenin-7-O-β-D-glucopyranoside, eriodictyol 7-O-β-D-glucopyranoside, nepetoidin A, nepetoidin B, rosmarinic acid, methyl rosmarinate, syringaresinol, pinoresinol-4-O-β-D-glucopyranoside, pinoresinol-4,4-O-β-D-bisglucopyranoside, maltol 6'-O-(5-O-p-                                                                                                                                                                                                                                                                                                                                                                                                                                              | Yang et al. 2021                                                                                                                                 |

| Specie                                                                  | Plant part            | Phytochemistry                                                                                                                                                                                                                                                                                                                                                                                                                                                                                                    | Reference                                                                                                                  |
|-------------------------------------------------------------------------|-----------------------|-------------------------------------------------------------------------------------------------------------------------------------------------------------------------------------------------------------------------------------------------------------------------------------------------------------------------------------------------------------------------------------------------------------------------------------------------------------------------------------------------------------------|----------------------------------------------------------------------------------------------------------------------------|
|                                                                         |                       | coumaroyl)- $\beta$ -D-apiofuranosyl- $\beta$ -D-glucopyranosid, shimobashiraside A, prunasin, citrusin C, phenyl- $\beta$ -D-glucopyranoside, 2-phenylethyl $\beta$ -D-glucopyranoside, naginata ketone, oresbiusin A, tanshinol.                                                                                                                                                                                                                                                                                |                                                                                                                            |
| <i>Elsoltzia stachyodes</i> (Link) C.Y. Wu                              | Whole plant           | Tannis, flavonoids, triterpenes and saponines                                                                                                                                                                                                                                                                                                                                                                                                                                                                     | Banerjee et al. 2021                                                                                                       |
| <i>Elsholtzia stauntonii</i> Benth.                                     | Aerial parts          | Galic acid; hydroxyphenyl acetic acid; chlorogenic acid; caffeic acid; syringic acid; benzoic acid; trans-ferulic acid; sinapic acid; trans-cinnamic acid; quinic acid; rutin; quercetin-3- $\beta$ -glucoside; naringenin; neohesperidin; quercetin; luteolin; Kaempferol                                                                                                                                                                                                                                        | Zotsenko et al., 2021                                                                                                      |
| <i>Eplingiella fruticosa</i> (Salzm. ex Benth.) Harley & J.F.B. Pastore | leaves                | $\alpha$ -pinene, camphene, sabinene, $\beta$ -pinene, limonene, 1,8-cineole, camphor, borneol, $\delta$ -elemene, $\alpha$ -cubebene, $\alpha$ -ylangene, $\beta$ -elemene, $\beta$ -caryophyllene, trans-muurola-3,5- diene, $\alpha$ -humulene, cis-murrola-4(14),5- diene, trans-murrola4(14),5-diene, Bicyclogermacrene, cis-calamenene, trans-cadina-1,4- diene, $\alpha$ - cadinene, spathulenol, globulol, epi- $\alpha$ -cadinol, $\alpha$ -cadinol                                                      | Beserra-Filho et al. 2019                                                                                                  |
| <i>Glechoma hederacea</i> L.                                            | Whole plant           | Methyl isoferuloyl-7-(3,4-dihydroxyphenyl) lactate, methyl rosmarinate, ethyl rosmarinate, benzyl-4'-hydroxy-benzoyl-3'-O- $\beta$ -D-glucopyranoside, 3'-O-methyl-rosmarinic acid, rosmarinic acid.<br>gallic acid; catechin hydrate; chlorogenic acid; caffeic acid; daidzin; ferulic acid; rutine; genistin; quercetin; genistein; trans-3-pinanone; 4, 5, 6, 7-tetrahydro-5-isopropenyl-3,6- $\beta$ -metil-6- $\alpha$ -vinyl benzo furan; $\beta$ -caryophyllene; spathulenol.                              | An et al., 2006<br>Kim et al., 2011<br>Vogl et al. 2013<br>Wang et al., 2017<br>Chou et al., 2018                          |
| <i>Glechoma longituba</i> (Nakai) Kuprian.                              | Whole plant           | Apigenin-7-diglucoronide                                                                                                                                                                                                                                                                                                                                                                                                                                                                                          | Bian et al., 2017                                                                                                          |
| <i>Horminum pyrenaicum</i> L.                                           | Root                  | Horminone, 7-O-acetylhorminone, inuroyleanol, 15,16-dehydro-inuroroleanol, agastaquinone, 3-deoxiagastaquinone, agastol, 15,16-dehydro-agastol                                                                                                                                                                                                                                                                                                                                                                    | Becker et al., 2018                                                                                                        |
| <i>Hyptis capitata</i> Jacq.                                            | Leaves and seeds      | Alkaloids, coumarins, glycosides, flavonoids, quinones.                                                                                                                                                                                                                                                                                                                                                                                                                                                           | Castro et al. 2021                                                                                                         |
| <i>Hyptis crenata</i> Pohl ex Benth.                                    | Leaves; Aerial parts. | 1,8-cineole, $\alpha$ -pinene, camphor, $\beta$ -pinene, 3-(Z)-hexenol, tricyclene, $\alpha$ -thujene, $\alpha$ -fenchene, camphene, thuja-2,4(10)-diene, myrcene, $\alpha$ -phellandrene, $\alpha$ -terpinene, p-cymene, o-cymene, $\gamma$ -terpinene, terpinolene, exo-fenchol, cis-p-menth-2-en-1-ol, camphene hydrate, pinocarvone, borneol, terpinen-4-ol, p-cymen-8-ol, $\alpha$ -terpineol, myrtenol, $\alpha$ -longipinene, $\gamma$ -maaliene, aromadendrene, selina-5,11-diene, $\alpha$ -himachalene, | De Jesus et al., 2009; Coelho-De-Souza et al., 2021; Allves-Soares et al., 2022; Shipa et al., 2022; De Lima et al., 2023; |

| Specie                                           | Plant part   | Phytochemistry                                                                                                                                                                                                                                                                                                                                                                                                                                                                                                                                                                                                                                                                           | Reference                                                                                                                                                     |
|--------------------------------------------------|--------------|------------------------------------------------------------------------------------------------------------------------------------------------------------------------------------------------------------------------------------------------------------------------------------------------------------------------------------------------------------------------------------------------------------------------------------------------------------------------------------------------------------------------------------------------------------------------------------------------------------------------------------------------------------------------------------------|---------------------------------------------------------------------------------------------------------------------------------------------------------------|
|                                                  |              | $\alpha$ -humulene, 9-epi-E-caryophyllene, $\gamma$ -himachalene, 11 $\alpha$ -Himachala-1,4-diene, viridiflorene, $\beta$ -himachalene, Spathulenol, viridiflorol, caryophylla-4(12),8(13)-dien-5 $\beta$ -ol, , allo-himachalol, pinene, $\beta$ -caryophyllene.                                                                                                                                                                                                                                                                                                                                                                                                                       |                                                                                                                                                               |
| <i>Hyptis marrubiioides</i> Epling               | Leaves       | $\alpha$ -thujene; $\beta$ -thujene, $\alpha$ -copaene; $\alpha$ -caryophyllene; germacrene D; cadalene; cedrol                                                                                                                                                                                                                                                                                                                                                                                                                                                                                                                                                                          | Botrel et al., 2010                                                                                                                                           |
| <i>Hyptis pectinata</i> (L.) Poit.               | Flowers      | Pectinolide J; hyptolide; pectinolide E                                                                                                                                                                                                                                                                                                                                                                                                                                                                                                                                                                                                                                                  | Santana et al., 2022                                                                                                                                          |
| <i>Hyptis suaveolens</i> (L.) Poit.              | Leaves       | Suaveolol y methyl suaveolate                                                                                                                                                                                                                                                                                                                                                                                                                                                                                                                                                                                                                                                            | Almeida-Bezerra et al., 2022                                                                                                                                  |
| <i>Hyptis umbrosa</i> Salzm. ex Benth.           | Leaves       | Epigallocatechine; tannic acid; lupeol; borneol; gallic acid; gallocatechin; chlorogenic acid; protocatechuic acid; catechin; apigenin; kaempferol; chrysin                                                                                                                                                                                                                                                                                                                                                                                                                                                                                                                              | Anjos et al., 2017                                                                                                                                            |
| <i>Hissopus cuspidatus</i> Boriss.               | Aerial parts | Rosmarinic acid, 3 $\beta$ -hydroxy-7,8-dihydro- $\beta$ -ionone, oleanolic acid, ferulic acid, ethyl ferulate, (E)-3-4-hydroxy-3-methoxyphenyl)acrylic acid, 3,4-dihydroxy benzaldehyde, quercetin, quercetin-3-O-glucopyranoside, luteolin, luteolin-7-O-rutinoside, diosmetin, diosmetin-3'-O- $\beta$ -D-glucopyranoside, apigenin-6,8-di-C- $\beta$ -D-glucopyranoside, 3-(4-hydroxy-3-methoxy-phenyl) acrylic acid carboxymethyl ester, caffeic acid methyl ester, Luteolin 7-O- $\alpha$ -L-rhamnopyranosyl (1 --> 6)- $\beta$ -D-glucopyranoside, luteolin 7-O- $\beta$ -D-glucuronide, diosmin, acacetin 7-O- $\alpha$ -L-rhamnopyranosyl(1 --> 6)- $\beta$ -D-glucopyranoside. | Qin et al., 2023; Aihaiti et al., 2023; Cai et al., 2023; Ling-Fei, K. et al, 2023; Liu et al., 2021; Liu et al., 2021b; Yuan et al., 2019; Zhao et al., 2013 |
| <i>Hyssopus officinalis</i> L.                   | Aerial parts | Chlorogenic acid; rosmarinic acid                                                                                                                                                                                                                                                                                                                                                                                                                                                                                                                                                                                                                                                        | Ma et al., 2014<br>Mohammad et al., 2019<br>Micovic et al., 2022                                                                                              |
| <i>Isodon adenanthus</i> (Diels) Kudô            | Leaves       | Adenantin                                                                                                                                                                                                                                                                                                                                                                                                                                                                                                                                                                                                                                                                                | Yin et al., 2013                                                                                                                                              |
| <i>Isodon amethystoides</i> (Benth.) H. Hara     | Whole plant  | Glaucocalyxin A                                                                                                                                                                                                                                                                                                                                                                                                                                                                                                                                                                                                                                                                          | Xiang et al. 2014                                                                                                                                             |
| <i>Isodon coetsa</i> (Buch.-Ham. ex D. Don) Kudô | Leaves       | Spirolactone, 7 $\alpha$ ,20-epoxy-ent-kaurane                                                                                                                                                                                                                                                                                                                                                                                                                                                                                                                                                                                                                                           | Neelamkavil Thoppil, 2013, 2014                                                                                                                               |

| Specie                                               | Plant part   | Phytochemistry                                                                                                                                                                                                                                                                                                                                                                                                                                                                                                                                                                                                                                                                                                                                                                                          | Reference                                                                                                                                    |
|------------------------------------------------------|--------------|---------------------------------------------------------------------------------------------------------------------------------------------------------------------------------------------------------------------------------------------------------------------------------------------------------------------------------------------------------------------------------------------------------------------------------------------------------------------------------------------------------------------------------------------------------------------------------------------------------------------------------------------------------------------------------------------------------------------------------------------------------------------------------------------------------|----------------------------------------------------------------------------------------------------------------------------------------------|
| <i>Isodon enanderianus</i><br>(Hand. -Mazz.) H.W. Li | Aerial parts | Enanderinanine J                                                                                                                                                                                                                                                                                                                                                                                                                                                                                                                                                                                                                                                                                                                                                                                        | Na et al., 2010                                                                                                                              |
| <i>Isodon eriocalyx</i><br>(Dunn) Kudô               |              | Eriocalyxin B, Phomopchalsin A, Phomopchalsin B, Phomopchalsin C, 11 $\alpha$ ,15 $\alpha$ -diacetoxy-6 $\beta$ ,7 $\beta$ -dihydroxy-7 $\alpha$ ,20-epoxi-ent-kaur-16-eno; 1 $\alpha$ ,15 $\beta$ -diacetoxy-6 $\beta$ ,7 $\beta$ -dihydroxy-7 $\alpha$ ,20-epoxi-ent-kaur-16-ene; maoecrystal S; maoecrystal D; hikiokoshin C; maoecrystal A; eriocalyxin D; maoecrystal E                                                                                                                                                                                                                                                                                                                                                                                                                            | Lu et al., 2013<br>Leung et al., 2006<br>Yan et al., 2016<br>Lou et al. 2019<br>Zhang et al. 2020<br>Li et al., 2021                         |
| <i>Isodon excisus</i><br>(Maxim.) Kudô               | Leaves       | Inflexinol, inflexin                                                                                                                                                                                                                                                                                                                                                                                                                                                                                                                                                                                                                                                                                                                                                                                    | Lee et al. 2007; Ko et al. 2010.                                                                                                             |
| <i>Isodon henryi</i> (Hemsl.) Kudô                   | Whole plant  | Isohenolide A; isohenolide B; 6 $\alpha$ , 15 $\beta$ -dihydroxy-6, 20-epoxi-enmein-16-en; isorubessin D; isorubessin A; epinodosin; isodocarpine; rabdoternine A; lasiokaurinin; 1 $\alpha$ , 11 $\alpha$ , 15 $\beta$ -triacetyl-6 $\beta$ , 7 $\beta$ -dihydroxyl-7 $\alpha$ , 20-epoxi-kaur-16-ene; radbdosianin A; oridonina; effusanin A; lasiokaurin; rosthorin A; lasiodonin.                                                                                                                                                                                                                                                                                                                                                                                                                   | Cheng et al., 2022                                                                                                                           |
| <i>Isodon japonicus</i><br>(Burm. f.) H. Hara        | Aerial parts | (-)-sesamin-2,2 $\circ$ diol, caffeic acid, isoquercitrin, rosmarinic acid, pedalitin, kamebanin, kamebacetal A, kamebakaurin, excisanin A; Effusanin C: isodojaponin D.                                                                                                                                                                                                                                                                                                                                                                                                                                                                                                                                                                                                                                | Hwang et al. 2001; Shin et al., 2004; Hong et al., 2009; Lim et al. 2010; Kim et al., 2011; Kim et al., 2013; Kang, 2018; Ikoma et al., 2022 |
| <i>Isodon leucophyllus</i><br>(Dunn) Kudô            |              | 11 $\alpha$ -acetoxyeffusanin D; 6-acetylepinodosinol; 16 $\beta$ -ethoxymethyleneshikokianin; 16 $\alpha$ -ethoxymethyleneshikokianin                                                                                                                                                                                                                                                                                                                                                                                                                                                                                                                                                                                                                                                                  | Chen et al., 1999                                                                                                                            |
| <i>Isodon melissoides</i><br>(Benth.) H.W. Li        | Aerial parts | Melissoidesin, $\alpha$ -thujene, $\alpha$ -pinene, camphene, sabinene, 1-Octen-3-ol, myrcene, 3-Octanol, $\delta$ -2-carene, $\alpha$ -phellandrene, $\alpha$ -terpinene, p-cymene, limonene, $\beta$ -phellandrene, 1,8-Cineole, (Z)- $\beta$ -ocimene, (E)- $\beta$ -ocimene, $\gamma$ -terpinene, acetophenone, cis-sabinene hydrate, terpinolene, linalool, trans-sabinene hydrate, camphor, menthone, borneol, menthol, terpinen-4-ol, p-cymen-8-ol, $\alpha$ -terpineol, thymol methyl ether, carvacrol methyl ether, bornyl acetate, thymol, carvacrol, thymol acetate, eugenol, carvacrol acetate, (E)-caryophyllene, $\alpha$ -trans-bergamotene, $\alpha$ -humulene, germacrene D, $\alpha$ -zingiberene, $\beta$ -bisabolene, $\delta$ -cadinene, caryophyllene oxide, humulene epoxide II. | Yu et al. 2007; Kumar et al. 2021                                                                                                            |

| Specie                                             | Plant part   | Phytochemistry                                                                                                                                                                                                                                                                                                                                                                                                                                                                                                                                                | Reference                                                                               |
|----------------------------------------------------|--------------|---------------------------------------------------------------------------------------------------------------------------------------------------------------------------------------------------------------------------------------------------------------------------------------------------------------------------------------------------------------------------------------------------------------------------------------------------------------------------------------------------------------------------------------------------------------|-----------------------------------------------------------------------------------------|
| <i>Isodon rugosiformis</i> (Hand.-Mazz.) H. Hara   | Aerial parts | Isorugosiformin A; isorugosiformin B; isorugosiformin C; isorugosiformin D; isorugosiformin E; isorugosiformin F                                                                                                                                                                                                                                                                                                                                                                                                                                              | Zhang et al., 2020b                                                                     |
| <i>Isodon scoparius</i> C.Y. Wu & H.W. Li) H. Hara | Aerial parts | Scopariusol L; scopariusol M; scopariusol N; scopariusol O; scopariusol P; scopariusols Q; scopariusols R: scopariusol S; scopariusol T                                                                                                                                                                                                                                                                                                                                                                                                                       | Jiang et al. 2018                                                                       |
| <i>Isodon serra</i> (Maxim.) Kudô                  | Aerial parts | Oridonin, 15-acetylmegathyrin B, serrin E, 14b-hydroxyrabdocoestin A, serrin F, serrin G, 11-epi-rabdocoestin A, serrin H, serrin I, 15-acetylenanderianin N, rabdocoestin A, rabdocoestin B, enanderianin N, 1a,11b-dihydroxy-1a,11b-acetonide-7a,20-epoxy-ent-kaur-16-en-15-one, megathyrin A, enanderianin L, megathyrin B, enmein, nodosin, lasiodonin, epinodosin. isoserrin A, isoserrin B, isoserrin C, isoserrin D, isoserrin E, isoserrin F, isoserrin G, isoserrin H, isoserrin I, isoserrin J.                                                     | Zhang et al. 2005; Li et al. 2010; Zhou et al. 2013; Wan et al. 2016; Xing et al. 2020; |
| <i>Isodon sculponeatus</i> (Vaniot) Kudô           | Aerial parts | sculponeatin I, sculponin A, sculponeatin A, sculponin T, sculponeatin J, sculponeatin K, sculponeatin C, sculponeatin Q, 6,7-seco-ent-kaurane diterpenoid; sculponin U-Z; wikstroemioidin A, 1 $\alpha$ ,6 $\beta$ ,7 $\beta$ ,15 $\beta$ -tetrahydroxy-7 $\alpha$ ,20-epoxy-ent-kaur-16-ene, bisjaponin A, lushanrubescensin J, ent-kaurane-7 $\alpha$ ,16 $\beta$ ,17-triol, sculponeatin L, sculponeatin N, ent-abienervonin C, hebeiabinin B, maoyecrystal G, maoyecrystal H.                                                                            | Jiang et al. 2014a; Jiang et al. 2014b.                                                 |
| <i>Isodon ternifolius</i> (D.Don) Kudô             | Root         | ternifoliuslignan A; ternifoliuslignan B; ternifoliuslignan C; ternifoliuslignan D; ternifoliuslignan E; ternifoliusoside F; ternifoliusoside G; ternifoliusoside H; 3-carboxi-6,7-dihydroxy-1-(3',4'-hidroxi phenyl)-naftaleno, (+)-syringaresinol; 1-acetoxyl-2e,6e-dipiperonil-3,7-dioxabicyclo-[3,3,0]-octane; (7S,8S)-3-methoxy-3',7-epoxi-8,4'-oxineolignan-4,9,9' -triol, 3-(3,4-dihydroxyphenyl); acrylic-1-(3,4-dihydroxyphenyl)-2-methoxycarbonyl ethyl ester acid; oxyneolignan A; evofolin-B; 1,2-bis (4-hydroxy-3-methoxyphenyl)-1,3-propanediol | Zhang et al., 2018                                                                      |
| <i>Isodon rubescens</i> (Hemsl.) H. Hara           | Aerial parts | effusanin A; lasiodonin; oridonin; epinodosin; nodosin; ponacidin; rabdoternin A; enmenol; lasiokaurin; lasiokaurinol<br>isojiangrubesin A; isojiangrubesin B; isojiangrubesin C; isojiangrubesin D; isojiangrubesin E; isojiangrubesin F; isojiangrubesin G; 20(R*)-6 $\beta$ ,7 $\beta$ ,15 $\beta$ -trihydroxy-20-metoxi-7 $\alpha$ ,20-epoxy-ent-kaur-16-en-1 $\alpha$ ,11 $\beta$ -acetonide; nervosanin A;                                                                                                                                              | Du et al., 2013<br>Zhang et al., 2017<br>He et al., 2018<br>Jia et al., 2019            |

| Specie                                              | Plant part      | Phytochemistry                                                                                                                                                                                                                                                                                                                                                                                                                                                                                                                                                                                                                         | Reference                                                                                                                                                                                                                                  |
|-----------------------------------------------------|-----------------|----------------------------------------------------------------------------------------------------------------------------------------------------------------------------------------------------------------------------------------------------------------------------------------------------------------------------------------------------------------------------------------------------------------------------------------------------------------------------------------------------------------------------------------------------------------------------------------------------------------------------------------|--------------------------------------------------------------------------------------------------------------------------------------------------------------------------------------------------------------------------------------------|
|                                                     |                 | Oridonin; rubescensin C; enmenol; longikaurin A; hebeirubescensin K; 15-acetylmegatirin B; lasiokaurinal; rostorin A; hebeirubescensin B; xerophinoid B; rabdoternin A; rabdoternin F; rabdoternin E; isodonhenrin D; asiodonin; wikstroemioidin B: 7,14-O-(1-methylethylidene)oridonin.                                                                                                                                                                                                                                                                                                                                               |                                                                                                                                                                                                                                            |
| <i>Isodon wikstroemioides</i> (Hand.-Mazz.) H. Hara | Aerial parts    | isowikstroemins A–M, macrocalyxin B, pseudoirroratin A.                                                                                                                                                                                                                                                                                                                                                                                                                                                                                                                                                                                | Wu et al. 2014; Wu et al. 2015.                                                                                                                                                                                                            |
| <i>Lallemantia royleana</i> (Benth.) Benth.         |                 | Alkaloids, anthraquinones, flavonoids, glycosides, tannins, volatile oils, mixed fatty acids, terpenoids.                                                                                                                                                                                                                                                                                                                                                                                                                                                                                                                              | Bhardwaj et al., 2020; Bhardwaj Bhatia 2020                                                                                                                                                                                                |
| <i>Lavandula angustifolia</i> Mill.                 | Leaves; flowers | Rosmarinic acid; luteolin; apigenin; luteolin 7-O- $\beta$ -D-glucoside; apigenin 7-O- $\beta$ -D-glucoside; luteolin 7-O- $\beta$ -D-glucuronide, limonene; eucalyptol; trans- $\beta$ -ocimene; $\beta$ -linalool; camphor; lavandulol; borneol; 4-terpineol; $\alpha$ -terpineol; lavandulol acetate; $\beta$ -farnesen, pectines: chPS-L1 y chPS-L2, linalyl acetate; caryophyllene; (E)-3,7-dimethylocta-1,3,6-trieno; gallic acid; ferulic acid; quercetin; myricetin.                                                                                                                                                           | Hajhashemi et al., 2003; Zhao et al., 2015; Giovannini et al., 2016 Georgiev et al., 2017; Cardia et al., 2018; Souri et al., 2019; Chen et al., 2020; Donatello et al., 2020 Slighoua et al., 2022; Pandur et al., 2021; Xie et al., 2022 |
| <i>Lavandula coronopifolia</i> Poir.                | Aerial parts    | $\alpha$ -Pinene, camphene, $\beta$ -pinene, octan-3-ol, myrcene, yomogi alcohol , p-cymene, limonene, cineole, cis-ocimene, trans-ocimene, cis-linalool oxide, trans-linalool oxide, camphor, borneol, terpinen-4-ol, $\alpha$ -terpineol, linalyl formate, linalyl acetate, geranial, lavandulyl acetate, neryl acetate, caryophyllene.                                                                                                                                                                                                                                                                                              | Abeer et al. 2020; Nassef et al. 2022                                                                                                                                                                                                      |
| <i>Lavandula dentata</i> L.                         | Aerial parts    | $\alpha$ -pinene; camphene; verbenene; sabinene; p-cymene; 1,8-cineole; linalool oxide; $\alpha$ -campholene aldehyde; camphor; verbenol; pinocarvone; borneol; terpinen-4-ol; myrtenol; verbenone; $\alpha$ -selinene; $\alpha$ -eudesmol; Vanillic acid; chlorogenic acid; caffeic acid; coumaric acid hexoside; hydroxybenzoic acid; coumaric acid pentoside hexoside; ferulic acid hexoside; apigenin d-C-hexoside; hypolaetin di-glucuronide; luteolin glucuronide hexoside; yunnaneic acid E ; Yunnaneic acid D; Luteolin 7,4'-di-glucuronide; isoscutellarein 8-O-glucuronide; Sagerinic acid; Salvianolic acid C, Ursolic acid | Algieri et al., 2016; Contreras et al., 2018; Abdelhakim et al., 2023                                                                                                                                                                      |
| <i>Lavandula latifolia</i> Medik.                   | Aerial parts    | $\alpha$ -pinene, camphene, $\beta$ -pinene, sabinene, $\delta$ -3-carene, myrcene, $\alpha$ -terpinene, limonene, 1,8-cineole, $\beta$ -phellandrene, (Z)- $\beta$ -ocimene, p-cymene, terpinolene, $\gamma$ -campholene aldehyde, trans-linalool oxide, $\alpha$ -copaene, camphor, $\beta$ -bourbonene, $\beta$ -cubebene, linalyl                                                                                                                                                                                                                                                                                                  | Shimizu et al., 1990; Carrasco et al., 2015; Vairinhos and Miguel,                                                                                                                                                                         |



| Specie                                    | Plant part   | Phytochemistry                                                                                                                                                                                                                                                                                                                                                                                                                                                                                                                                                                                                                                                                                                                                                                                                                                                                                                             | Reference                                                                                                        |
|-------------------------------------------|--------------|----------------------------------------------------------------------------------------------------------------------------------------------------------------------------------------------------------------------------------------------------------------------------------------------------------------------------------------------------------------------------------------------------------------------------------------------------------------------------------------------------------------------------------------------------------------------------------------------------------------------------------------------------------------------------------------------------------------------------------------------------------------------------------------------------------------------------------------------------------------------------------------------------------------------------|------------------------------------------------------------------------------------------------------------------|
|                                           |              | acetate, trans- $\alpha$ -bergamotene, $\alpha$ -bergamotene, terpinen-4-ol, $\beta$ -caryophyllene, lavandulyl acetate, (Z)- $\beta$ -farnesene, sesquisabinene, isoborneol, $\alpha$ -humulene, $\alpha$ -terpineol, $\gamma$ -terpineol, borneol, germacrene D, neryl acetate, $\beta$ -bisabolene, $\delta$ -cadinene, (E)- $\alpha$ -bisabolene, geranyl acetate, nerol, calamenene, geraniol, (Z)-3-hexenyl nonanoate, caryophyllene oxide, carvacrol; fenchone; eremophyllene; <i>trans</i> - $\alpha$ -necrodol; <i>trans</i> - $\alpha$ -necroyl acetate; tetramethyl-5-methylene-cyclopenten-2-enone; <i>cis</i> -necrolyl acetate; $\beta$ -selinene; lavandulol; selina-3,7(11)-diene; $\Delta$ 3-carene; myrtenol; verbenone, eucalyptol, coumarin , 7-methoxycoumarin, trans-phytol.                                                                                                                         | 2020; Lucca et al., 2022; Karaka et al., 2023;                                                                   |
| <i>Lavandula multifida</i> L.             | Aerial parts | Maslinic acid; 15S,16-dihydroxy-7-oxopimar-8(9)-ene; 15,16,17-trihydroxy-7-oxopimar-8(9)- ene, carvacrol-3-glucoside; 3 $\beta$ ,19 $\alpha$ , 23-trihydroxy-urs-12-en-28-oic acid; 15S,16-dihydroxyisopimar-8(9)-ene; 15,16-dihydroxy-7,11- dioxopimar-8(9)-ene; 15,16,17-trihydroxypimar-8(9)-ene; carvacrol; oleanolic acid; ursolic acid                                                                                                                                                                                                                                                                                                                                                                                                                                                                                                                                                                               | Sosa et al. 2005                                                                                                 |
| <i>Lavandula pedunculata</i> (Mill.) Cav. | Aerial parts | $\alpha$ -pinene; $\alpha$ -fenchene; camphene; sabinene $\alpha$ -fenchol; $\alpha$ -campholenal; $\beta$ -pinene; myrcene; $\delta$ -3-carene; p-cymene; limonene; <i>cis</i> - $\beta$ -ocimene/ <i>trans</i> - $\beta$ -ocimene; <i>cis</i> - $\alpha$ -necrodol; 1,8-cineole; <i>cis</i> -linalool oxide; fenchone; linalool; thujone; camphor; menthone; borneol; p-Mentha-1,5-dien-8-ol; lavandulol; terpinen-4-ol; $\alpha$ -terpineol; myrtenal; myrtenol, verbenone; fenchyl acetate; eucarvone; pulegone; linalyl acetate; bornyl acetate; lavandulyl acetate; thymol; carvacrol; myrtenyl acetate; neryl acetate; lyratyl acetate; $\alpha$ gurjunene; caryophyllene; $\gamma$ -selinene; $\delta$ -cadinene; selina-3,7(11)-diene; ledol; viridiflorol; <i>epi</i> -cubebol; $\tau$ -muurolol; $\beta$ -eudesmol; $\alpha$ -cadinol; gentisic acid; caftaric acid, protocatchuic acid; esculetin; pinocembrin | Azevedo et al., 2015; Lopes et al., 2018; Vairinhos and Miguel 2020; Zuzarte et al. 2022; Domingues et al., 2023 |
| <i>Lavandula pubescens</i> Decne.         | Aerial parts | Acoradien, alloaromadendrene, $\alpha$ -bergamotene, $\alpha$ -calacorene, $\alpha$ -copaene, $\alpha$ -cubebene, $\alpha$ -cumene $\alpha$ -gurjunene, $\alpha$ -humulene, $\alpha$ -muurolene, $\alpha$ -phellandrene, $\alpha$ -terpinene, $\alpha$ -terpinolene, $\alpha$ -ylangene, $\beta$ -bisabolene, $\beta$ -copaene, $\beta$ -elemene, $\beta$ -eudesmene, $\beta$ -guaiene, $\beta$ -ylangene, carvacrol, caryophyllene, caryophyllene oxide, cyclosativene, E- $\beta$ -ocimene, $\epsilon$ -caryophyllene, ledene, limonene, jolkinol D, longifolene, neo-allo-ocimene, p-cymenene, p-xylene, $\delta$ -valerolactone, thymol, calamenene.                                                                                                                                                                                                                                                                   | Ali-Shtayeh et al. 2020; Ahmad et al. 2022; Acero et al. 2023.                                                   |

| Specie                                       | Plant part                | Phytochemistry                                                                                                                                                                                                                                                                              | Reference                                                                                                          |
|----------------------------------------------|---------------------------|---------------------------------------------------------------------------------------------------------------------------------------------------------------------------------------------------------------------------------------------------------------------------------------------|--------------------------------------------------------------------------------------------------------------------|
| <i>Lavandula stoechas</i> L.                 | Aerial parts; flowers     | Fenchone; camphor, caffeic acid; rosmarinic acid; 4-hydroxybenzoic acid; apigenin; gentisic acid; Apigetrin; fumaric acid; gallic acid.                                                                                                                                                     | Amira et al., 2012<br>Zuzarte et al. 2013<br>Zoubi et al., 2016<br>Kulabas et al., 2018                            |
| <i>Lavandula viridis</i> L'Her.              | Aerial parts              | $\alpha$ -pinene , 1,8-cineole, linalool, camphor , selina-3,7(11)-diene, camphene, camphor.                                                                                                                                                                                                | Skala E et al., 2020; Zuzarte et al. 2022                                                                          |
| <i>Lavandula x intermedia</i>                | Aerial parts              | 1,8-cineol, linalool, camphor , $\beta$ -caryophyllene , borneol, $\alpha$ -pinene, $\beta$ -pinene, sabinene, myrcene, limonene, p-cymene, 1-octen-3-ol, bornyl acetate, terpinen-4-ol, myrtenal, neryl acetate, carvone, cuminal, p-cymen-8-ol, caryophyllene oxide, $\alpha$ -bisabolol. | Carbone et al. 2018; Karakas Matpan 2022                                                                           |
| <i>Lepechinia caulescens</i> (Ortega) Epling | Leaves                    | Ursolic acid; oleanolic acid; rosmarinic acid                                                                                                                                                                                                                                               | Vergara-Martínez et al., 2021                                                                                      |
| <i>Lepechinia meyenii</i> (Walp.) Epling     | Leaves                    | Flavonoids                                                                                                                                                                                                                                                                                  | Arenas-Chávez et al. 2018.                                                                                         |
| <i>Melissa officinalis</i> L.                | Leaves                    | Rosmarinic acid, nerol; citral; isopulegol; caryophyllene; caryophyllene oxide, citronelle, caffeic acid, citronellal; m-cumaric acid, geranial; hesperidin, hesperetin; naringenin; neral; luteolin; eriodictiol-7-O-glucoside                                                             | Guginski et al., 2009<br>Müzell et al., 2013<br>Bohunihi et al., 2013<br>Zam et al., 2002<br>Draginic et al., 2022 |
| <i>Mentha arvensis</i> L.                    | Whole plant; aerial parts | $\alpha$ -pinene; $\beta$ -pinene; mircene; limonene; 3-octanol; menthone; isomenthone; methyl acetate; isopulegol; neomenthol; menthol; germacrene D; piperitone, linarin                                                                                                                  | Feng et al., 2015; Thawkar et al., 2016; Demirci et al., 2021<br>Kim et al., 2021b                                 |
| <i>Mentha cervina</i> L.                     | Aerial parts              | Pulegone; terpinen-4-ol; carvacrol                                                                                                                                                                                                                                                          | Miguel et al., 2021                                                                                                |
| <i>Mentha cordifolia</i> Opiz ex Fresen.     | Leaves                    | $\beta$ -sitosterol; $\beta$ -sitosterol- $\beta$ -D-glucoside ; menthol                                                                                                                                                                                                                    | Bayat et al., 2019; Villaseñor et al., 2002                                                                        |

| Specie                                                 | Plant part           | Phytochemistry                                                                                                                                                                                                                                                                                                                                                                                                                                                                                                                                                                                                                                                                                                                        | Reference                                                                                                                             |
|--------------------------------------------------------|----------------------|---------------------------------------------------------------------------------------------------------------------------------------------------------------------------------------------------------------------------------------------------------------------------------------------------------------------------------------------------------------------------------------------------------------------------------------------------------------------------------------------------------------------------------------------------------------------------------------------------------------------------------------------------------------------------------------------------------------------------------------|---------------------------------------------------------------------------------------------------------------------------------------|
| <i>Mentha longifolia</i> (L.) Huds.                    | Whole plant          | Piperitone oxide; pulegone; epoxy- trans-piperitone; menthone; 1,8-cineole; (Z)- $\beta$ -ocimene; menthol; rosmarinic acid; rutin; caffeic acid; 2,5-dihydroxybenzoic acid; chlorogenic acid; vanillic acid; ferulic acid; longifolin A, eucalyptol                                                                                                                                                                                                                                                                                                                                                                                                                                                                                  | Karimian et al., 2013; Ibrahim et al., 2016; Murad et al., 2016; Dadkhah et al. 2018; Moshrefi-Araghi et al., 2021; Wang et al., 2022 |
| <i>Menta piperita</i> L.                               | Leaves; aerial parts | Menthol; menthone; menthol acetate                                                                                                                                                                                                                                                                                                                                                                                                                                                                                                                                                                                                                                                                                                    | Abdolmaleki et al. 2013; Sun et al., 2014; Li et al., 2017; Yi et al., 2022                                                           |
| <i>Mentha pulegium</i> L.                              | Aerial parts: leaves | Pulegone; menthol; isomenthone<br>menthone; piperitone.<br>hydroxycinnamic acids; hydroxymethoxyflavones; catechins; hydroxybenzoic acids                                                                                                                                                                                                                                                                                                                                                                                                                                                                                                                                                                                             | Luis Domingues, 2021<br>Moussaid et al., 2011<br>Brahmi et al., 2018<br>Messaoudi et al., 2022<br>Rocha et al., 2019                  |
| <i>Mentha spicata</i> L.                               | Whole plant; leaves  | palmitic acid: oleic acid; linoleic acid; stearic acid, stearidonic acid;<br>carvone; carvacrol; trans-carveol; piperitone oxide; limonene; 1,8-cineole; camphene; p-cymene; dihydrocarvone; pulegone; $\beta$ -caryophyllene; germacrene D; menthone; $\alpha$ -pinene; linalool; ergosterol; stigmasterol; $\beta$ -sitosterol; $\alpha$ -tocopherol; apigenin; naringenin; epicatechin; catechin; rutin; myricetin; luteolin; ferulic acid; coumaric acid; sinapic acid                                                                                                                                                                                                                                                            | el Menyiy et al., 2022                                                                                                                |
| <i>Mentha suaveolens</i> Ehrh.                         | Aerial parts         | $\alpha$ -pinene, sabinene, $\beta$ -pinene, limonene, linalool, borneol, cis-dihydrocarvone, trans-carveol, carvone, carvone oxide, neo-dihydrocarveol acetate, trans-carvyl acetate, $\alpha$ -copaene, $\beta$ -bourbonene, cis-jasmone, trans- $\beta$ -caryophyllene, $\beta$ -cedrene, $\beta$ -copaene, $\alpha$ -humulene, $\gamma$ -muurolene, germacrene D, bicyclogermacrene, $\gamma$ -cadinene, di-epi- $\alpha$ -cedrene epoxide, 1,5-epoxy salvial-4(14)-ene, germacrene D-4-ol, spathulenol, globulol, 1, 10-di-epi-cubenol, epi- $\alpha$ -cadinol, epi- $\alpha$ -muurolol, bisabolene oxide, mint sulfide, $\alpha$ -bisabolene oxide, phytol, manoyl oxide, abietatriene, rosmarinic acid, myrcene, viridoflorol. | Moreno et al., 2002; El-Kashoury et al. 2012; Mogosan et al., 2017; Lee et al., 2021                                                  |
| <i>Mentha x villosa</i>                                | Leaves               | Piperitone oxide                                                                                                                                                                                                                                                                                                                                                                                                                                                                                                                                                                                                                                                                                                                      | Souza PJC et al. 2009.                                                                                                                |
| <i>Micromeria biflora</i> (Buch. Ham. ex D.Don) Benth. | Aerial part          | Salicilalazina                                                                                                                                                                                                                                                                                                                                                                                                                                                                                                                                                                                                                                                                                                                        | Alhojani et al. 2022                                                                                                                  |

| Specie                                                           | Plant part                      | Phytochemistry                                                                                                                                                                                                                                                                                                                                                                                                                                                                                                                                                                                                                                                                                                                                                                                                                                                                                                                                                                                        | Reference                                                                                                                      |
|------------------------------------------------------------------|---------------------------------|-------------------------------------------------------------------------------------------------------------------------------------------------------------------------------------------------------------------------------------------------------------------------------------------------------------------------------------------------------------------------------------------------------------------------------------------------------------------------------------------------------------------------------------------------------------------------------------------------------------------------------------------------------------------------------------------------------------------------------------------------------------------------------------------------------------------------------------------------------------------------------------------------------------------------------------------------------------------------------------------------------|--------------------------------------------------------------------------------------------------------------------------------|
| <i>Minthostachys mollis</i> Griseb.                              | Leaves                          | $\alpha$ -pineno; $\beta$ -pineno; o-cimeno; eucaliptol; linalool; acetato de octen-1-ol; isomentona; mentona; trans-mentona; $\gamma$ -elemene                                                                                                                                                                                                                                                                                                                                                                                                                                                                                                                                                                                                                                                                                                                                                                                                                                                       | Sánchez-Tito et al. 2021                                                                                                       |
| <i>Minthostachys verticillata</i> (Griseb.) Epling               | Aerial parts; Leaves and steams | pulegone, menthone                                                                                                                                                                                                                                                                                                                                                                                                                                                                                                                                                                                                                                                                                                                                                                                                                                                                                                                                                                                    | Gonzalez-Pereira et al., 2005; Cariddi et al., 2006; Montironi et al., 2019; Rodriguez-Basso et al., 2021; Sharun et al., 2021 |
| <i>Monarda bradburiana</i> L.C. Beck/ <i>Monarda punctata</i> L. | Aerial parts; Flowers           | Thymol                                                                                                                                                                                                                                                                                                                                                                                                                                                                                                                                                                                                                                                                                                                                                                                                                                                                                                                                                                                                | Salehi et al., 2018                                                                                                            |
| <i>Monarda didyma</i> L.                                         | Aerial parts                    | $\alpha$ -phellandrene, $\alpha$ -pinene, $\alpha$ -terpinene, $\alpha$ -terpineol, $\alpha$ -terpinolene, $\alpha$ -thujene, $\beta$ -caryophyllene, $\beta$ -myrcene, $\beta$ -pinene, bornyl acetate, camphene, carvacrol, carvacrol methyl ether, cis-sabinene-hydrate, D-limonene, eucalyptol, $\gamma$ -cadinene, germacrene D, limonene, linalool, linalyl acetate, myrcene, p-cymene, $\delta$ -2-carene, Thymol                                                                                                                                                                                                                                                                                                                                                                                                                                                                                                                                                                              | Cotê et al. 2021; Fraternale et al. 2022.                                                                                      |
| <i>Monarda fistulosa</i> L.                                      |                                 | monardic acid A, monardic acid B, lithospermic acid B, neochlorogenic acid; chlorogenic acid, caffeic acid; luteolin-7-O-glucoside, apigenin-7-O-glucoside, rosmarinic acid, acacetin-7-O-glucoside, luteolin, apigenin, $\alpha$ -pinene, 1-octen-3-ol, $\beta$ -phellandrene, 2-carene, p-cymene, $\gamma$ -terpinene, thymoquinone, thymol, carvacrol, caryophyllene, $\beta$ -copaene, 2-tert-butylhydroquinone, p-tert-butyl catechol, 1,4-eicosadiene, heptadecane, squalene, $\alpha$ -tocopherol, $\beta$ -sitosterol.                                                                                                                                                                                                                                                                                                                                                                                                                                                                        | Murata et al., 2013; Shanaida et al., 2021a; Shanaida et al., 2021b                                                            |
| <i>Mosla chinensis</i> Maxim.                                    | Stem and leaf                   | $\alpha$ -caryophyllene, $\beta$ -sitosterol, carvacrol, n-hexadecanoic acid, linoleic acid, linolenic acid, phytol, stearic acid, stigmasterol, terpinen-4-ol, thymol, apigenin-8-C-xylosyl-G-C-glucoside, isoorientin, isoorientin-2-O-rhamnoside, isoorientin-4-O-xyioside, isovitexin-2-O-rhamnoside, kaempferol 3-(2G-xylosylrutinoside), kaempferol 3-O-glucoside, kaempferol-3-O-(6 malonyl) glucoside, luteolin, luteolin-6,8-di-C-hexoside, orientin, orientin-2-O-rhamnoside, peonidin-3-O-glucoside, quercetin-acetyl- glycoside, quercetin-3-O-glucoside, quercetin-3-O-rutinoside, swertisin, vitexin-2-O-rhamnoside, (+)-catechin-3-O-b-D-gluco(2,6-bis-cinnamoyl)-pyranoside, 5,7-dihydroxy-4'-methoxy-6-methyl homoisoflavanone, gluconic acid, malic acid, citric acid, quinic acid, succinic acid, azelaic acid, caffeic acid, dicaffeoylferulic acid, dihydroxybenzoic acid hexoside, ellagic acid glucuronide, ferulic acid hexoside, p-hydroxybenzoic acid, protocatechuic acid, | Wang et al. 2021; Zhong et al. 2022.                                                                                           |

| Specie                                       | Plant part   | Phytochemistry                                                                                                                                                                                                                                                                                                                                                                                                                                                                                                                                                                                                                                                                                                                                                                                                                                                                                                                                                                                                           | Reference                                                                                 |
|----------------------------------------------|--------------|--------------------------------------------------------------------------------------------------------------------------------------------------------------------------------------------------------------------------------------------------------------------------------------------------------------------------------------------------------------------------------------------------------------------------------------------------------------------------------------------------------------------------------------------------------------------------------------------------------------------------------------------------------------------------------------------------------------------------------------------------------------------------------------------------------------------------------------------------------------------------------------------------------------------------------------------------------------------------------------------------------------------------|-------------------------------------------------------------------------------------------|
|                                              |              | rosmarinic acid, rosmarinic acid-O-hexoside, vanillic acid $\beta$ -glucoside, 4-caffeoylquinic acid, 5-caffeoylquinic acid, acetyl-emodin, casticin, danshensu, diglycol laurate, everlastoside, forrestin A, gingerglycolipid, uridine, 28- $\beta$ -D-glucopyranosyl-2 $\alpha$ ,3 $\beta$ ,19 $\alpha$ -trihydroxyolean-12-ene-24,28-dioic acid.                                                                                                                                                                                                                                                                                                                                                                                                                                                                                                                                                                                                                                                                     |                                                                                           |
| <i>Mosla scabra</i> (Thunb.) C.Y.Wu & H.W.Li | Aerial parts | 5-hydroxy-6,7-dimethoxyflavone; 5-hydroxy-7,8-dimethoxyflavone                                                                                                                                                                                                                                                                                                                                                                                                                                                                                                                                                                                                                                                                                                                                                                                                                                                                                                                                                           | Chen et al., 2013                                                                         |
| <i>Nepeta bracteata</i> Benth.               | Aerial parts | Nepetabrates E-J , 6-methyl-1,4-oxazocane-5,8-dione, angustanoic acid F-G, jiadifenoic acid, nepetabrates A-D, 7 $\alpha$ -hydroxycallitrisic acid, 1-phenanthrenecarboxylic acid, nepetabrate K, vangerolactone                                                                                                                                                                                                                                                                                                                                                                                                                                                                                                                                                                                                                                                                                                                                                                                                         | Zhang et al. 2021; Yang et al. 2022.                                                      |
| <i>Nepeta cataria</i> Benth.                 | Aerial parts | Luteolin-7-O-glucuronide, luteolin-7-O-glucurono-(1-6)glucoside, apigenin-7-O-glucuronide, luteolin, apigenin, apigenin-7-O-glucoside, luteolin-7-O-glucoside, caffeic acid, rosmarinic acid, p-coumaric acid, lamiuside A, verbascoside, nepetalactone, actinidine, iridomyrmecin, $\beta$ -caryophyllene, nerol, caryophyllene oxide, elemol, geraniol, geranial, 1,8-cineol, citronellol, citronellyl acetate, $\beta$ -sitosterol, $\alpha$ -amyrin, ursolic acid, piperitone, humulene oxide, thymol, sabinene, $\alpha$ -humulene, $\alpha$ -pinene, $\beta$ -farnesene, myrcene, photocitral B, citronellal, Z-isocitral, menthol, lavandulol, rosefuran epoxide, E-isocitral, terpineol, nerol, neral.                                                                                                                                                                                                                                                                                                           | Modnicki et al. 2007; Prescott et al., 2011; Pargaian et al., 2020; Acimovic et al., 2022 |
| <i>Nepeta deflersiana</i> Schweinf. ex Hedge | Aerial parts | Borneol, bulnesol, baffeic acid, bamphor, carvone, caryophyllene oxide, cemberene A, cis-carveol, decanoic acid, (E)- $\beta$ -farnesene, (E)- $\beta$ -caryophyllene, (E)- $\beta$ -damascenone, (E)-2-hexenal, eugenol, epi- $\alpha$ -muurolol, eudesm-11-en-4 $\alpha$ -ol, exo-fenchol, fenchone, geraniol, humulene epoxide II, irridoid glucoside 8-epi-7-deoxyloganic acid, limonene, linalool, lupeol, manool, methyleugenol, methyl rosmarinate, myrtenol, n-tetradecanoic acid, phytol, rosmarinic acid, terpinen-4-ol, thymol, trans-carveol, ursolic acid, $\alpha$ -alaskene, $\alpha$ -calacorene, $\alpha$ -guaiaol, $\beta$ -bisabolol, $\beta$ -bourbonene, $\beta$ -eudesmol, $\beta$ -pinene, $\beta$ -selinene, $\beta$ -sitosterol, $\gamma$ -eudesmol, $\tau$ -cadinol, 1 $\alpha$ -hydroxy-7 $\alpha$ ,14 $\alpha$ ,18-triacetoxy-isopimara-8,15-diene, 2-methoxy-p-cresol, 2,3-dihydroxy ursolic acid, 6,10,14-trimethylpentadecane-2-one, 7-epi- $\alpha$ -selinene, 8-epi-7-deoxyloganic acid | Al Taweel et al. 2017; Orfali et al. 2018; Ahmad et al. 2022.                             |
| <i>Nepeta menthoides</i> (Boiss.) Buhse      | Aerial parts | Dihydromyrcene, geranyl acetate, isothymusin, neryl acetate, rosmarinic acid, $\alpha$ -linalool, $\alpha$ -pinene, $\alpha$ -terpineol, $\beta$ -pinene, $\gamma$ -terpinene, 1, 8-cineole, 4 $\alpha$ , 7 $\alpha$ , 7 $\alpha$ -nepetalactone, cirsimaritin, genkwanin                                                                                                                                                                                                                                                                                                                                                                                                                                                                                                                                                                                                                                                                                                                                                | Memariani et al. 2018; Süntar et al. 2018:                                                |

| Specie                                     | Plant part                 | Phytochemistry                                                                                                                                                                                                                                                                                                                                                                                                                                                                                                                                                                                                                                                                                                                                                                                                                                                                                                                                                                                                                                                                                                                                                                                                                                                                                                                                                                                                                                                                                                                                                                                                                                                                                                                                                                                                                                                                                                                                                                                                                                               | Reference                                                     |
|--------------------------------------------|----------------------------|--------------------------------------------------------------------------------------------------------------------------------------------------------------------------------------------------------------------------------------------------------------------------------------------------------------------------------------------------------------------------------------------------------------------------------------------------------------------------------------------------------------------------------------------------------------------------------------------------------------------------------------------------------------------------------------------------------------------------------------------------------------------------------------------------------------------------------------------------------------------------------------------------------------------------------------------------------------------------------------------------------------------------------------------------------------------------------------------------------------------------------------------------------------------------------------------------------------------------------------------------------------------------------------------------------------------------------------------------------------------------------------------------------------------------------------------------------------------------------------------------------------------------------------------------------------------------------------------------------------------------------------------------------------------------------------------------------------------------------------------------------------------------------------------------------------------------------------------------------------------------------------------------------------------------------------------------------------------------------------------------------------------------------------------------------------|---------------------------------------------------------------|
| <i>Nepeta meyeri</i> Benth.                | Aerial parts               | Nepetalactone, epinepetalactone.                                                                                                                                                                                                                                                                                                                                                                                                                                                                                                                                                                                                                                                                                                                                                                                                                                                                                                                                                                                                                                                                                                                                                                                                                                                                                                                                                                                                                                                                                                                                                                                                                                                                                                                                                                                                                                                                                                                                                                                                                             | Cigremis et al. 2010; Süntar et al. 2018.                     |
| <i>Nepeta pogonosperma</i> Jamzad & Assadi | Aerial parts               | 1,8- cineole, 4 $\alpha$ , 7 $\alpha$ -nepetalactone                                                                                                                                                                                                                                                                                                                                                                                                                                                                                                                                                                                                                                                                                                                                                                                                                                                                                                                                                                                                                                                                                                                                                                                                                                                                                                                                                                                                                                                                                                                                                                                                                                                                                                                                                                                                                                                                                                                                                                                                         | Ali et al., 2012; Khalighi-Sigaroodi et al., 2013             |
| <i>Nepeta tenuifolia</i> Benth.            | Aerial parts               | Caryophyllene oxide, carvone, carveol, 1, 2-dihydroxy-8 (9) -ene-p-menthane, 2-hydroxy-2-isopropenyl-5- methylcyclohexanone, isopulegone, , limonene, menthone, menthofurane, $\beta$ -myrcene, piperitenone, pulegone, pulegone oxide, schizonepetin, schizonepetoside A, schizonepetoside B, schizonepetoside C, schizonepetoside D, schizonepetoside E, schizonodiol, schizonol, $\gamma$ -terpinene, verbenone, cedrenol, germacrene D, humulene, patchoulol, petafolia A, petafolia B, (+)-spatulanol, trans-phytol, maslinic acid, oleanolic acid, 2 $\alpha$ ,3 $\alpha$ ,24 $\alpha$ -trihydroxyolean-12en28oic acid, ursolic acid, acaciin, apigenin, apigetrin, chrysoeriol-7-O- $\beta$ -D-rutinoside, diosmetin, diosmetin-7-O- $\beta$ -D-glucopyranoside, eupatilin, genkwanin, isorhoifolin, ladanein, luteolin, luteolin-3',4'-dimethylether 7-O- $\beta$ -D-glucuronic acid methyl ester, luteolin-3',4'-dimethylether-7-O- $\beta$ -D-rutinoside, luteolin-7-O- $\beta$ -D-glucuronopyranoside, luteolin-7-O- $\beta$ -D-rutinoside, luteoloside, pectolinarigenin, thermopsoside, tilianin, hesperidin, hesperetin-7-O- $\beta$ -D-glucopyranoside, quercitrin, caffeic acid, trans-cinnamic acid, 2,3-di-O-cinnamoyltartaric acid, p-coumaric acid, eicosanoic acid, 3-O-feruloylquinic acid methyl ester, 4-O-feruloylquinic acid methyl ester, 3-hydroxybenzoic acid, 12-O- $\beta$ -D-glucopyranosyl oxyjasmonic acid methyl ester, Rosmarinic acid, salicylic acid, schizotenuin A, schizotenuin C1, schizotenuin C2, schizotenuin D, vanillactic acid, p-cymene-3,8-diol, daucosterol, 8,9-dehydrothymol, 3,9-dihydroxymegastigman-5-ene, 3,4-dihydroxyphenethyl alcohol-4-O- $\beta$ -D-glucopyranoside, 2,6-dimethoxybenzoquinone, 5 $\alpha$ ,8 $\alpha$ -epidioxyergosta-6,22-diol-3 $\beta$ -ol, isosyringin, methylconiferin, m-methylcyclohexanone, 3-methoxyl-4-hydroxycinnamic alcohol 9-O- $\beta$ -D-glucopyranoside, prunasin, schitenoside A, schitenoside B, schitenoside C, stigmast-4-en-3-one, $\beta$ -sitosterol | Shan et al., 2021                                             |
| <i>Ocimum basilicum</i> L.                 | Aerial parts               | Methyl chavicol; cineole; eugenol; methyl eugenol; elemicin; myristicin; rosmarinic acid; linalool; apigenin; ursolic acid; methyl cinnamate.                                                                                                                                                                                                                                                                                                                                                                                                                                                                                                                                                                                                                                                                                                                                                                                                                                                                                                                                                                                                                                                                                                                                                                                                                                                                                                                                                                                                                                                                                                                                                                                                                                                                                                                                                                                                                                                                                                                | Aminian et al., 2022                                          |
| <i>Ocimum campechianum</i> Mill.           | Leaves; roots and rhizomes | Eugenol, (E)- $\beta$ -caryophyllene, bicyclogermacrene, eugenol, 1,8-cineole, elemicin.                                                                                                                                                                                                                                                                                                                                                                                                                                                                                                                                                                                                                                                                                                                                                                                                                                                                                                                                                                                                                                                                                                                                                                                                                                                                                                                                                                                                                                                                                                                                                                                                                                                                                                                                                                                                                                                                                                                                                                     | Lino et al., 2005; De Pinho et al., 2012; Pandey et al., 2014 |

| Specie                                         | Plant part   | Phytochemistry                                                                                                                                                                                                                                                                                                                                                                                                                                                                                                                                                                                                                                                                                                                                                                                                                                                                                                                                                                                                                                                                                                                                                                                                                                                                        | Reference                                                                                                                                      |
|------------------------------------------------|--------------|---------------------------------------------------------------------------------------------------------------------------------------------------------------------------------------------------------------------------------------------------------------------------------------------------------------------------------------------------------------------------------------------------------------------------------------------------------------------------------------------------------------------------------------------------------------------------------------------------------------------------------------------------------------------------------------------------------------------------------------------------------------------------------------------------------------------------------------------------------------------------------------------------------------------------------------------------------------------------------------------------------------------------------------------------------------------------------------------------------------------------------------------------------------------------------------------------------------------------------------------------------------------------------------|------------------------------------------------------------------------------------------------------------------------------------------------|
| <i>Ocimum kilimandscharicum</i> Baker ex Gürke | Aerial parts | Santene, iso-citronelle, $\alpha$ -pinene, camphene, p-3-menthene, $\alpha$ -phellandrene, 2-acetyl-thiazole, limonene, 1,8-cineole, cis-arbuscolone, artemisia ketone, dihydro myrcenol, m-cymenene, terpinolene, linalool, 3-iso-thujanol, cis-verbenol, camphor, borneol, $\alpha$ -terpineol, myrtenol, verbenone, trans-piperitol, trans-carveol, carvone, $\alpha$ -ylangene, bakerol, D-germacrene, neryl isobutanone, $\gamma$ -cadinene, vanillin acetate, flavesone, silphiperfol-5-en-3-ol, D-davanone, tetradecanal, eremoligenol, 3-iso-thujopsanone, valerianol, cadelene, sesquicineol-2-one, methyl linoleate, methyl octadecanoate.                                                                                                                                                                                                                                                                                                                                                                                                                                                                                                                                                                                                                                  | de Lima et al., 2014; Nahak Kanta, 2014; dos Santos et al., 2021                                                                               |
| <i>Ocimum labiatum</i> (N.E. Br.) A.J. Paton   | Leaves       | 2 $\alpha$ -hydroxylabda-8(17),12E,14-trien-18-oic acid, 4-epicommunic acid, labda-8(17),12E,14-triene-2R,18-diol.                                                                                                                                                                                                                                                                                                                                                                                                                                                                                                                                                                                                                                                                                                                                                                                                                                                                                                                                                                                                                                                                                                                                                                    | Kapewangolo et al. 2015; Lambrechts Lall 2019.                                                                                                 |
| <i>Ocimum sanctum</i> L.                       | Aerial parts | Eugenol; euginal; ursolic acid; carvacrol; linalool; limatrol; caryophyllene; methyl chavicol; rosmarinic acid; apigenin; cirsimaritin; isotimusin; isotimonin; orientin; vicenin.                                                                                                                                                                                                                                                                                                                                                                                                                                                                                                                                                                                                                                                                                                                                                                                                                                                                                                                                                                                                                                                                                                    | Pattanayak et al., 2010; Singh et al., 2018                                                                                                    |
| <i>Ocimum selloi</i> Benth.                    | Leaves       | 3-octenol, trans-ocimene, methyl chavicol, cis-anethol, $\delta$ -elemene, $\alpha$ -copaene, $\beta$ -bourbonene, $\beta$ -cubenene, $\beta$ -elemene, methyl eugenol, trans-caryophyllene, $\beta$ -gurjunene, $\alpha$ -humulene, allo-aromadendrene, germacrene D, $\beta$ -selinene, $\alpha$ -(E, E)-farnesene, $\delta$ -cadinene, 3-octanone, bicyclogermacrene                                                                                                                                                                                                                                                                                                                                                                                                                                                                                                                                                                                                                                                                                                                                                                                                                                                                                                               | Moraes et al., 2002; Piva et al., 2021                                                                                                         |
| <i>Origanum spp.</i>                           | Aerial parts | 4-caffeoylquinic acid, 3,5-dicaffeoylquinic acid, 4, 5-dicaffeoylquinic acid, 4-feruloylquinic acid, 1,3,4-tricaffeoylquinic acid, apigenin, vicenin-2, apigenin-7-O-glucoside, apigenin-7-O-pentosylhexoside, apigenin-O-hexosyl-(1 $\rightarrow$ 2)-hexoside, diosmetin-O-glucuronide, eriodictyol-O-acetyldipentoside, fustin-O-(hydroxymethylphenyl)-O-hexoside, hispidulin-O-pentosylhexoside, hispidulin-O-rhamnoside, homoorientin, luteolin-7-O-glucoside, luteolin-7-O-pentosylhexoside, naringenin, phlorizin, isoquercitrine, 3-hydroxyphlorizin, caffeic acid, gallic acid ethyl ester, gallic acid-O-hexoside, gentisic acid, gentisic acid derivative, gentisic acid-(dihydroxy-phenyl-methyl)-O-hexoside, gentisic acid- (hydroxy-phenyl-methyl)-O-dihexoside, gentisic acid-(hydroxy-phenyl-methyl)-O-hexoside, o-coumaric acid, p-coumaric acid, protocatechuic acid, protocatechuic acid O-hexoside, vannilic acid, lithospermic acid, rosmarinic acid, salvianolic acid H/I, salvianolic acid, $\alpha$ -thujene, $\alpha$ -pinene, $\beta$ -myrcene, $\alpha$ -phellandrene, (+)-4-Carene, p-cymene, $\beta$ -pinene, linalool, carvacrol, thymol, caryophyllene, camphene, $\alpha$ -terpinene, camphor, borneol, terpinen-4-ol, $\alpha$ -terpineol, carvacrol. | Kogiannou et al. 2013; Zengin et al. 2019; El kharraf et al., 2020; Hamamouchi et al., 2021; Sharifi-Rad et al. 2021; Al-Mijalli et. al., 2022 |

| Specie                                    | Plant part                                               | Phytochemistry                                                                                                                                                                                                                                                                                                                                                                                                                                                         | Reference                                                                                                                                                        |
|-------------------------------------------|----------------------------------------------------------|------------------------------------------------------------------------------------------------------------------------------------------------------------------------------------------------------------------------------------------------------------------------------------------------------------------------------------------------------------------------------------------------------------------------------------------------------------------------|------------------------------------------------------------------------------------------------------------------------------------------------------------------|
| <i>Orthosiphon aristatus</i> (Blume) Miq. | Aerial parts; leaves                                     | Ursolic acid; oleanolic acid                                                                                                                                                                                                                                                                                                                                                                                                                                           | Hsu et al., 2010; Vijayan et al., 2017                                                                                                                           |
| <i>Orthosiphon stamineus</i> Benth.       | Aerial parts                                             | Orthosiphone A; orthosiphone B; orthosiphon A; orthosiphon B; betulinic acid; $\beta$ -elemene; caffeic acid; sinensetin; eupatorin; $\beta$ -amyrin; camphor; terpineol; linal; valencene.                                                                                                                                                                                                                                                                            | Singh et al., 2015                                                                                                                                               |
| <i>Perilla frutescens</i> (L.) Britton    | Leaves; seed                                             | Ursolic acid; corosolic acid; 3-epicorosolic acid; pomolic acid; tormentic acid; hiptadienic acid; oleanolic acid; augustic acid; 3-epimaslinic acid; linoleic acid; palmitic acid; stearic acid; linoleic acid; linolenic acid; luteolin; magnosalin; perfrancin                                                                                                                                                                                                      | Banno et al., 2004; Huang et al., 2014; Ueda et al., 2002; Zuo et al., 2002; Liu et al., 2022b; Kangwan et al., 2021; Zhao et al., 2022.                         |
| <i>Platostoma africanum</i> P. Beauv.     | Aerial parts                                             | Ursolic acid; oleanolic acid; epimaslinic acid; corosolic acid; tomentic acid; $\beta$ -sitosterol; stigmasterol.                                                                                                                                                                                                                                                                                                                                                      | Aladedunye et al., 2008                                                                                                                                          |
| <i>Plectranthus caninus</i> Vatke         | Aerial parts                                             | $\alpha$ -thujone; thujo-2,4(10)-diene; $\alpha$ -terpinene; p-cymene; fenchone.                                                                                                                                                                                                                                                                                                                                                                                       | Tadesse et al., 2011                                                                                                                                             |
| <i>Plectranthus ecklonii</i> Benth.       | Aerial parts                                             | Parvifloron D; $\beta$ -sitosterol; stigmasterol                                                                                                                                                                                                                                                                                                                                                                                                                       | Andrade et al., 2018                                                                                                                                             |
| <i>Plectranthus ornatus</i> Codd.         | Aerial parts                                             | (11R*,13E)-11-acetoxyhalima-5,13-dien-15-oic acid; 1 $\alpha$ ,6 $\beta$ -diacetoxy-8 $\alpha$ ,13R*-epoxy-14-labden-11-one; 1,6-di-O-acetylforskolin and, 1,6-di-O-acetyl-9-deoxyforskolin                                                                                                                                                                                                                                                                            | Sitarek et al., 2022.                                                                                                                                            |
| <i>Plectranthus zeylanicus</i> Benth.     | Whole plant                                              | Eudesm-7(11)-en-4-ol, hexadecanoic acid, phytol, 9,12,15-octadecatretinoic acid, callitrisic acid, cholest-5-en-3 $\beta$ -ol, ergosta-5,22-dien-3 $\beta$ -ol, campesterol, stigmasterol, $\beta$ -sitosterol, $\beta$ -amyrin, $\alpha$ -amyrin, stigmast-4-en-3-one, cinncassiol, coleone, stigmasterol-5,22,25-trien-3- $\beta$ -ol, 7 $\alpha$ -acetoxy-6 $\beta$ -hydroxyroyleanone.                                                                             | Napagoda et al., 2014. Napagoda et al., 2022.                                                                                                                    |
| <i>Prunella vulgaris</i> L.               | Aerial parts; leaves and stem; whole plant; fruit spikes | 2 $\alpha$ , 3 $\alpha$ , 23-trihidroxiursa-12,20(30)-dien-28-oic acid, $\beta$ -amyrin, eusapic acid; hexadecanoic acid; ethyl palmitate; phytol ; ethyl linoleate; linoleic acid; nerol; linalyl formate; betulinic acid; ursolic acid; 2 $\alpha$ , 3 $\alpha$ -hydroxy-urs-12-ene-28-oic acid; 2 $\alpha$ , 3 $\alpha$ -dihidroxiursolic acid; prunellanate A, prunellanate B, prunelladiterpenel A, gallic acid; caffeic acid; rutin; rosmarinic acid; quercetin. | Park et al., 2013; Li et al., 2020 Choia et al., 2016; Hwang et al., 2013; Yan, 2016; Tang et al., 2022 Ryu et al., 2000; Zheng et al., 2022 Zhang et al., 2018b |



| Specie                                         | Plant part           | Phytochemistry                                                                                                                                                                                                                                                                                                                                                                                                                                                                                                                                                                                                                                               | Reference                                                                                           |
|------------------------------------------------|----------------------|--------------------------------------------------------------------------------------------------------------------------------------------------------------------------------------------------------------------------------------------------------------------------------------------------------------------------------------------------------------------------------------------------------------------------------------------------------------------------------------------------------------------------------------------------------------------------------------------------------------------------------------------------------------|-----------------------------------------------------------------------------------------------------|
| <i>Salvia aethiophis</i> (Kunth) Lint & Epling | Root                 | Aethiopinone, rosmarinic acid, luteolin; apigenin                                                                                                                                                                                                                                                                                                                                                                                                                                                                                                                                                                                                            | Hernández-Pérez et al., 1995; Benrezzouk et al., 2001; Nworu and Akah, 2015; Vulganová et al., 2019 |
| <i>Salvia africana-caerulea</i> L.             | Aerial parts         | rosmarinic acid, yunnaneic acid, carnosic acid, carnosol, caffeic acid                                                                                                                                                                                                                                                                                                                                                                                                                                                                                                                                                                                       | Komatou et al., 2006; Kamatou et al., 2010; Bonito et al., 2011; Afonso et al., 2019a               |
| <i>Salvia albicaulis</i> Benth.                | Aerial parts         | viridiflorol, 1,8-cineole, limonene.                                                                                                                                                                                                                                                                                                                                                                                                                                                                                                                                                                                                                         | Kamatou et al., 2007.                                                                               |
| <i>Salvia apiana</i> Jeps.                     | Aerial parts         | Quinic acid, danshensu, protocatechuic acid, caffeoylquinic acid, luteolin, hesperidin, quercetin, rutinoid, rosmarinic acid, sagerinic, salvianolic acid, cirsimaritin, rosmanol, cornosol, carnosic acid                                                                                                                                                                                                                                                                                                                                                                                                                                                   | Afonso et al., 2019b                                                                                |
| <i>Salvia barrelieri</i> Benth.                | Aerial parts         | 3 $\beta$ -acetoxy-olean-18-ene-2 $\alpha$ -ol; pi-germanidiol; olean-18-ene-1 $\beta$ ,2 $\alpha$ ,3 $\beta$ -triol; micromeric acid; ursolic acid; salvigenin; apigenin-7-O- $\beta$ -d-glucopyranoside methyl ester; apigenin-7-O- $\beta$ -d-glucopyranoside; apigenin-7-O- $\beta$ -d-glucopyranoside; apigenin, cinaroside.                                                                                                                                                                                                                                                                                                                            | Lehbili et al., 2018                                                                                |
| <i>Salvia ceratophylla</i> L.                  | Aerial parts         | Linalool, germacrene D, $\beta$ -caryophyllene, bicyclogermacrene, sclareol, spathulenol, 1,8-cineole, $\alpha$ -terpineol, $\alpha$ -copaene, kaempferol, pseudobaptigenin.                                                                                                                                                                                                                                                                                                                                                                                                                                                                                 | Shehadeh et al., 2014; Bonesi et al., 2017; Abu-Darwish et al., 2020                                |
| <i>Salvia chamelaeagnea</i> Bergius            | Aerial parts         | $\alpha$ -eudesmol, $\alpha$ -gurjunene, $\alpha$ -humulene, $\alpha$ -pinene, $\alpha$ -terpineol, $\alpha$ -thujene, allo-aromadendrene, aromadendrene, $\beta$ -caryophyllene, $\beta$ -eudesmol, $\beta$ -gurjunene, $\beta$ -pinene, betulafolientriol oxide, caffeic acid, camphene, carnosic acid, carnosol, carvone, caryophyllene alcohol, caryophyllene oxide, cis-sabinene hydrate, (E)- $\beta$ -ocimene, (E)-nerolidol, Epi-cubenol, eudesmadiene, $\gamma$ -cadinene, globulol, ledol, limonene, linalool, myrcene, oleanolic acid, rosmarinic acid, ursolic acid, viridiflorene, viridiflorol, (Z)- $\beta$ -ocimene, 7-O-methyl-epirosmanol. | Kamatou et al. 2006; Kamatou et al. 2010                                                            |
| <i>Salvia compressa</i> Vent.                  | Root                 | Citrostadienol; $\beta$ -sitosterol; linolenic acid, linoleic acid; palmitic acid; geraniol.                                                                                                                                                                                                                                                                                                                                                                                                                                                                                                                                                                 | Noorbakhsh et al., 2022                                                                             |
| <i>Salvia desoleana</i> Atzei & P. Picci       | Aerial parts; leaves | $\beta$ -pinene, cineole, $\alpha$ -terpineol, linalool, linalyl $\alpha$ -terpinyl acetate, linalyl acetate.                                                                                                                                                                                                                                                                                                                                                                                                                                                                                                                                                | Peana Satta, 1993; Peana et al., 1999; Ceschel et al., 2000; Peana moretti, 2002.                   |
| <i>Salvia digitaloides</i> Diels               | Root                 | Salviatalin A; salvitrijudin A                                                                                                                                                                                                                                                                                                                                                                                                                                                                                                                                                                                                                               | Wu et al., 2010                                                                                     |

| Specie                                | Plant part                 | Phytochemistry                                                                                                                                                                                                                                                                                                                                                                                       | Reference                                                                                        |
|---------------------------------------|----------------------------|------------------------------------------------------------------------------------------------------------------------------------------------------------------------------------------------------------------------------------------------------------------------------------------------------------------------------------------------------------------------------------------------------|--------------------------------------------------------------------------------------------------|
| <i>Salvia dolomitica</i> Codd.        | Aerial parts               | geraniol; Linalyl acetate; linalool; $\alpha$ -terpineol; cis- $\beta$ -ocimene; sabinene; nerol oxide                                                                                                                                                                                                                                                                                               | Kamatou et al., 2007                                                                             |
| <i>Salvia fruticosa</i> Mill.         | Root; aerial parts         | Luteolin; rutin                                                                                                                                                                                                                                                                                                                                                                                      | Boukhary et al., 2016                                                                            |
| <i>Salvia glutinosa</i> L.            | Aerial parts               | Caffeic acid hexoside, apigenin-C-dihexoside, quercetin-O-hexoside, sagerinic acid, isorhamnetin-O-hexoside, rosmarinic acid, baicalein, luteolin acetyl-glucoside, salvianolic acid J, salvianolic acid A.                                                                                                                                                                                          | Nicolescu et al., 2022                                                                           |
| <i>Salvia hierosolymitana</i> Boiss.  | Aerial parts               | 3 $\beta$ ,6 $\alpha$ ,23-trihydroxyurs-12,19(29)-dien-28-oic acid; 23-(trans-p-coumaroyloxy)-3 $\beta$ ,6 $\alpha$ ,30-trihydroxyurs-12-en-28-oic acid; 2 $\alpha$ ,3 $\beta$ -dihydroxyolean-28-oic acid; 24-nor-2 $\alpha$ ,3 $\beta$ -dihydroxyolean-4,12-ene, 2 $\alpha$ ,3 $\beta$ ,23-trihydroxyurs-12-en-28-oic; 3 $\beta$ ,23-dihydroxyurs-12-en-28-oic acid; maslinic acid; arjunolic acid | De Felice et al., 2006; Miranda et al., 2022                                                     |
| <i>Salvia hydrangea</i> DC. ex Benth. | Aerial parts               | $\beta$ -pinene, 1-8-cineole, $\beta$ -caryophyllene, sclareol.                                                                                                                                                                                                                                                                                                                                      | Sonboli et al. 2009; Asadollahi et al., 2019;                                                    |
| <i>Salvia japonica</i> Thunb.         | Aerial parts               | $\alpha$ -terpinyl acetate camphor; linalool; triacetin; eucalyptol; (+)-2-bornanone; L- $\alpha$ -pinene; triacetin; plastolin I ; D-limonene                                                                                                                                                                                                                                                       | Li et al., 2021.; Sun et al., 2022.                                                              |
| <i>Salvia lachnostachys</i> Benth.    | Leaves                     | Fruticulin A                                                                                                                                                                                                                                                                                                                                                                                         | Piccinelli et al., 2014.                                                                         |
| <i>Salvia lanceolata</i> Lam.         | Leaves                     | Oleanolic acid, ursolic acid, betulafolientriol oxide, carnosol, rosmarinic acid, carnosic acid caffeic acid.                                                                                                                                                                                                                                                                                        | Kamatou et al., 2010.                                                                            |
| <i>Salvia lanigera</i> Poir.          | Leaves                     | Podocarpa-5,8,11,13-tetraen-7-one; 13-hydroxy-14-isopropyl; sclareol ; sugiol; ferruginol, aromadendrene, cis- $\alpha$ -bisabolene, 1,8-cineole eucalyptol ; camphor; $\alpha$ -terpineol; bornyl acetate; $\alpha$ -terpinenyl acetate; veridiflorol ; caryophyllene oxide                                                                                                                         | Alonazi, et al., 2021.                                                                           |
| <i>Salvia lavandulifolia</i> Vahl     |                            | $\alpha$ -pinene, sabinene, limonene, 1,8-cineole, linalool, camphor, borneol, terpinen-4-ol, linalyl acetate, $\alpha$ -terpinyl acetate, sabinil acetate.                                                                                                                                                                                                                                          | Porres-Martínez et al., 2013                                                                     |
| <i>Salvia leriifolia</i> Benth.       | Aerial parts; leaves; seed | rosmarinic acid; caffeic acid; salvianolic acid B; camphor; 1,8-cineole; camphene; $\alpha$ -pineno                                                                                                                                                                                                                                                                                                  | Hosseinzadeh Yavary, 1999; Loizzo et al., 2009; Hosseinzadeh et al., 2003; Modarres et al., 2014 |

| Specie                                                  | Plant part           | Phytochemistry                                                                                                                                                                                                                                                                                                                                                                                                                                                                                                                                                                                                                                 | Reference                                                                                      |
|---------------------------------------------------------|----------------------|------------------------------------------------------------------------------------------------------------------------------------------------------------------------------------------------------------------------------------------------------------------------------------------------------------------------------------------------------------------------------------------------------------------------------------------------------------------------------------------------------------------------------------------------------------------------------------------------------------------------------------------------|------------------------------------------------------------------------------------------------|
| <i>Salvia miltiorrhiza</i> Bunge                        | Root                 | Tanshinone I; tanshinone IIA; tanshinona IIB; cryptotanshinone; cryptotanshinone I; danshensu; rosmarinic acid; caffeic acid; lithospermic acid, salvianolic acid A-N; danshenxinkun A; przewaionona A                                                                                                                                                                                                                                                                                                                                                                                                                                         | Feng et al., 2021<br>Mahalaksmi et al., 2021<br>Yang et al., 2022                              |
| <i>Salvia mirzayanii</i> Rech. f. & Esfand.             | Aerial parts         | $\alpha$ -terpinyl, linalyl acetate, 1,8-cineole, linalool, $\gamma$ -cadinene, spathulenol, $\alpha$ -cadinol, (Z)-nerolidol, 5-neo-cedranol, germacrene, salvigenin, eupatorin, catechin, cirsimaritin, chrysoeriol, luteolin, rutin, rosmarinic acid, teuclatriol.                                                                                                                                                                                                                                                                                                                                                                          | Zarshenas et al., 2014; Ziaei et al., 2015; Amirghofran et al., 2011                           |
| <i>Salvia muirii</i> (L.) Bol.                          | Aerial parts         | Rosmarinic acid, carnosic acid, salvigenin, betulafolientriol oxide, carnosol, caffeic acid, oleanolic and ursolic acid, 1,8-cineole, $\alpha$ -pinene limonene.                                                                                                                                                                                                                                                                                                                                                                                                                                                                               | Kamatou et al., 2006; Kamatou et al., 2010.                                                    |
| <i>Salvia multicaulis</i> Vahl                          | Aerial parts         | Gallic acid; rosmarinic acid; chlorogenic acid; vanillin; p-coumaric acid; quercetin.                                                                                                                                                                                                                                                                                                                                                                                                                                                                                                                                                          | Rowshan Najafian, 2020                                                                         |
| <i>Salvia nipponica</i> Miq.                            | Root; leaves         | Taxodione; (+)-valeranone; nubiol; rosmarinic acid; salvianolic acid B; ursolic acid; 3-epicorosolic acid; caffeic acid; p-coumaric acid; vanillic acid; nicotinic acid                                                                                                                                                                                                                                                                                                                                                                                                                                                                        | Chan et al., 2011                                                                              |
| <i>Salvia officinalis</i> L.                            | Leaves               | 1,8-cineole; camphor; $\alpha$ -thujone; $\beta$ -thujone; borneol: viridiflor, tannic acid; oleanolic acid; ursolic acid; carnosol; carnosic acid; fumaric acid; chlorogenic acid; niacin; rosmarinic acid; luteolin-7-glucoside.                                                                                                                                                                                                                                                                                                                                                                                                             | Miraj Kiani, 2016                                                                              |
| <i>Salvia palaestina</i> Benth.                         |                      | Apigenin; Apigenin 7-O-glucuronide; rosmarinic acid; methyl rosmarinate                                                                                                                                                                                                                                                                                                                                                                                                                                                                                                                                                                        | Mehmet et al., 2021                                                                            |
| <i>Salvia petrophilla</i> G. X. Hu, E. D. Liu & Yan Liu | Whole plant          | Petrofin A; petrofin B; petrofin C; petrofin D; petrofin E                                                                                                                                                                                                                                                                                                                                                                                                                                                                                                                                                                                     | Zou et al., 2022                                                                               |
| <i>Salvia plebeia</i> R. Br.                            | Leaves; aerial parts | 1 $\beta$ -acetoxy-8 $\beta$ -hydroxy-2-oxoeudesman-3,7(11)-dien-8,12-olide; plebeiolide B; 8-methoxyplebeiolide B; plebeiolide A; eudebeiolide E; phaeusmane G; eudebeiolide F; plebeiolide C; eudebeiolide A; eudebeiolide B; eudebeiolide C; eudebeiolide G; eudebeiolide H, (1S,5S,8S,10R)-1-acetoxy-8-methoxy-2-oxoeudesman-3,7(11)-dien-8,12-olide; eudebeiolide I; eudebeiolide J; 6-hydroxyplebeiolide A; eudebeiolide K; 8-epi-eudebeiolida C, Salviplenoide A; salviplenoide B; salviplenoide C; salviplenoide D; salviplenoide E; salviplenoide F, luteoloside; nepitrin; homoplantagenin; luteolin; nepetin; hispidulin; eupatorin | Jeong et al., 2012; Akram et al., 2015; Jang et al., 2016; Jang et al., 2017; Zou et al., 2018 |
| <i>Salvia prionitis</i> Hance                           | Aerial parts         | Prionidipene A, prionidipene B, prionidipene C, prionidipene D, prionidipene E                                                                                                                                                                                                                                                                                                                                                                                                                                                                                                                                                                 | Li et al., 2018.                                                                               |

| Specie                                                                                                       | Plant part                | Phytochemistry                                                                                                                                                                                                                                                                                                                                                                                                                                                                                                                                                                                                                                                                                                                                                                                          | Reference                                                                                   |
|--------------------------------------------------------------------------------------------------------------|---------------------------|---------------------------------------------------------------------------------------------------------------------------------------------------------------------------------------------------------------------------------------------------------------------------------------------------------------------------------------------------------------------------------------------------------------------------------------------------------------------------------------------------------------------------------------------------------------------------------------------------------------------------------------------------------------------------------------------------------------------------------------------------------------------------------------------------------|---------------------------------------------------------------------------------------------|
| <i>Salvia przewalskii</i> Maxim.                                                                             |                           | Rosmarinic acid, salvianolic acid B, tanshinone I, dihydrotanshinone I                                                                                                                                                                                                                                                                                                                                                                                                                                                                                                                                                                                                                                                                                                                                  | Wang et al., 2010; Yang et al., 2017                                                        |
| <i>Salvia radula</i> Benth.                                                                                  | Aerial parts              | Rosmarinic acid, salvigenin, betulafolientriol oxide.                                                                                                                                                                                                                                                                                                                                                                                                                                                                                                                                                                                                                                                                                                                                                   | Kamatou et al., 2010.                                                                       |
| <i>Salvia repens</i> Burch. ex Benth.                                                                        | Aerial parts              | Rosmarinic acid, caffeic acid, carnosol, carnosic acid                                                                                                                                                                                                                                                                                                                                                                                                                                                                                                                                                                                                                                                                                                                                                  | Kamatou et al., 2010.                                                                       |
| <i>Salvia rosmarinus</i> (L.) J.B. Walker, B.T. Drew & J.G. González (Syn. <i>Rosmarinus officinalis</i> L.) | Aerial parts              | $\beta$ -pinene, 1,8-cineole, borneol, camphor, limonene, verbenone, carnosol, carnosic acid, rosmarinic, ursolic, oleanolic, micromeric acid.                                                                                                                                                                                                                                                                                                                                                                                                                                                                                                                                                                                                                                                          | Sousa et al., 2019; Malvezzi et al., 2020                                                   |
| <i>Salvia runcinata</i> L. f.                                                                                | Aerial parts              | $\alpha$ -pinene, 1,8-cineole, linalool, limonene, myrcene, $\beta$ -caryophyllene, spathulenol, $\beta$ -caryophyllene oxide, viridiflorol, $\delta$ -3-carene; $\alpha$ -bisabolol. $\alpha$ -bisabolol, rosmarinic acid; $\alpha$ -humulene, guaiol, $\alpha$ -bisabolol, manool; caffeic acid                                                                                                                                                                                                                                                                                                                                                                                                                                                                                                       | Komatou et al., 2005; Kamatou et al., 2008; Kamatou Viljoen, 2010; ; Komatou et al., 2010a. |
| <i>Salvia sagittata</i> Ruiz Pav.                                                                            | Aerial parts              | rosmarinic acid; chlorogenic acid, quercetin-3-O-glucoside, hesperetin, cinnamic acid, syringic acid.                                                                                                                                                                                                                                                                                                                                                                                                                                                                                                                                                                                                                                                                                                   | Mahmoud et al., 2019<br>Tubon et al., 2019                                                  |
| <i>Salvia sclarea</i> L.                                                                                     | Aerial part; leaves       | Rosmarinic acid; apigenin-7-O-glucoside<br>cineole; linalool; linalyl acetate; $\alpha$ -terpineol; methyl chavicol, sclareol                                                                                                                                                                                                                                                                                                                                                                                                                                                                                                                                                                                                                                                                           | Moretti et al., 1997; Zhong et al., 2015; Kostic et al., 2017; Yang et al., 2022            |
| <i>Salvia splendens</i> Sellow ex Nees                                                                       | Aerial parts              | rosmarinic acid; apigenin-7-glucoside, caffeic acid, vanillic acid, ferulic acid, rutin, p-coumaric acid, cinnamic acid, luteolin, apigenin, kaempferol; chrysin.                                                                                                                                                                                                                                                                                                                                                                                                                                                                                                                                                                                                                                       | El Sawi et al., 2021                                                                        |
| <i>Salvia verbenaca</i> L.                                                                                   | Whole plant; aerial parts | 1,8-Cineole, p-cymene, $\alpha$ -pinene, $\gamma$ -terpinene, $\beta$ -caryophyllene, viridiflorol, epi-13-manool, thymol, limonene, camphor, germacrene D, manool, copaene, cadinol, $\delta$ -cadinene, p-cymen-8-ol, $\alpha$ -humulene, $\alpha$ -thujone, (Z)- $\beta$ -ocimene, camphene, $\alpha$ -terpineol, bornyl acetate, bicyclogermacrene, $\beta$ -ionone, Epi- $\alpha$ -cadinol, <i>cis</i> -muurola-4(14),5-diene, muurola-3,5-diene, spathulenol, <i>cis</i> -calamenene, 1,10-di-epi-cubenol, (Z)- $\beta$ -ocimene, $\beta$ -eudesmol, isopentyl isovalerate, $\alpha$ -gurjunene, <i>trans</i> -sabinene hydrate acetate, $\beta$ -bourbonene, <i>E</i> - $\beta$ -ocimene, $\alpha$ -copaene, $\alpha$ -phellandrene, $\beta$ -cubebene, <i>cis</i> - $\beta$ -guaiene, $\beta$ - | Kamatou et al., 2008; Bonesi et al., 2017; Taarit et al., 2010; Khouchlaa et al., 2022      |

| Specie                                    | Plant part                             | Phytochemistry                                                                                                                                                                                                                                                                                                                                                                  | Reference                                                                  |
|-------------------------------------------|----------------------------------------|---------------------------------------------------------------------------------------------------------------------------------------------------------------------------------------------------------------------------------------------------------------------------------------------------------------------------------------------------------------------------------|----------------------------------------------------------------------------|
|                                           |                                        | cedrene, p-methyl-acetophenone, 1,10-di-epi-cubenol, (E)- $\beta$ -farnesene, $\alpha$ -muurolol, neryl acetate, fenchone, 9,12,15-octadecatrienal, (E)- $\beta$ -ionone, <i>cis</i> -Muurola-3,5-diene, $\gamma$ -amorphene, carvacrol, hexahydrofarnesyl acetone, p-cymen-8-ol, tricyclene, $\alpha$ -calacorene, palmitic acid, arachidic acid, stearic acid, arachidic acid |                                                                            |
| <i>Salvia virgata</i> Ortega              | Aerial parts                           | Rosmarinic acid; gallic acid, p-benzoic acid, caffeic acid, o-coumaric acid, luteolin-7-O-glucoside, luteolin; methyl rosmarinate, salvianolic acid F; verbascoside leucosceptoside A isoverbascoside martynoside                                                                                                                                                               | Akkol et al., 2008; Küpeli E et al. 2008; Grzegorzczuk-Karolak et al. 2022 |
| <i>Salvia yunnanensis</i> C.H. Wright     | Aerial parts                           | Yunnannin A; danshenol C                                                                                                                                                                                                                                                                                                                                                        | Bonito et al. 2011                                                         |
| <i>Satureja bachtiarica</i> Bunge         | Leaves                                 | Anethole; thymol; carvacrol; piperitenone; carvacryl acetate; caryophyllene aromadendrene $\alpha$ -curcumene; ledene: $\beta$ -bisabolene; cyclohexene; $\alpha$ -bisabolene; spathulenol; caryophyllene oxide.                                                                                                                                                                | Bakhtiarpoor et al., 2018                                                  |
| <i>Satureja cuneifolia</i> Ten.           | Aerial parts in flowering              | Thymol; p-cymene; terpinene; carvacrol.                                                                                                                                                                                                                                                                                                                                         | Momtaz Abdollahi 2010; Taskin et al. 2020                                  |
| <i>Satureja hortensis</i> L.              | Leaves and flowers; aerial parts; seed | $\alpha$ -thujone, $\alpha$ -pinene; $\beta$ -pinene; myrcene; $\alpha$ -terpinene; p-cymene; $\gamma$ -terpinene; thymol; carvacrol acetate; $\beta$ -caryophyllene                                                                                                                                                                                                            | Hajhashemi et al., 2002<br>Hajhashemi et al., 2012                         |
| <i>Satureja khuzistanica</i> Jamzad       | Aerial parts                           | Carvacrol, p-cimene; $\gamma$ -terpinene; (Z)- $\beta$ -ocimene; $\alpha$ -terpinole, $\alpha$ -terpinene; $\alpha$ -tujona; $\alpha$ -pinene.                                                                                                                                                                                                                                  | Amanlou et al., 2005; Abbasloo et al., 2016; Darabad et al., 2022.         |
| <i>Satureja montana</i> L.                | Aerial parts                           | rosmarinic acid; hyperoside; rutin; chlorogenic acid; p-coumaric acid; caffeic acid; epicatechin; carvacrol                                                                                                                                                                                                                                                                     | Miguel et al. 2021; Milijasevic et al., 2022                               |
| <i>Satureja sahendica</i> Bornm.          | Aerial parts and seed                  | Thymol                                                                                                                                                                                                                                                                                                                                                                          | Salehi et al., 2018; Omarizadeh et al., 2021                               |
| <i>Satureja spicigera</i> (K.Koch) Boiss. | Aerial parts                           | Thymol,p-cymene, terpinene, carvacrol                                                                                                                                                                                                                                                                                                                                           | Momtaz Abdollahi 2010; Salehi et al. 2018                                  |

| Specie                                   | Plant part                          | Phytochemistry                                                                                                                                                                                                                                                                                                                                                                                                                                                                                                                                                                                                                                                                                                                                                                                                                                                           | Reference                                                                                                                                                                                                                                      |
|------------------------------------------|-------------------------------------|--------------------------------------------------------------------------------------------------------------------------------------------------------------------------------------------------------------------------------------------------------------------------------------------------------------------------------------------------------------------------------------------------------------------------------------------------------------------------------------------------------------------------------------------------------------------------------------------------------------------------------------------------------------------------------------------------------------------------------------------------------------------------------------------------------------------------------------------------------------------------|------------------------------------------------------------------------------------------------------------------------------------------------------------------------------------------------------------------------------------------------|
| <i>Satureja thymbra</i> L.               |                                     | $\alpha$ -pinene, myrcene, $\gamma$ -terpinene, p-cymene, linalool, $\beta$ -caryophyllene, $\alpha$ -terpineol, borneol, geraniol, caryophyllene oxide, thymol, carvacrol                                                                                                                                                                                                                                                                                                                                                                                                                                                                                                                                                                                                                                                                                               | Karabay-Yavasoglu et al., 2006.                                                                                                                                                                                                                |
| <i>Tetradenia riparia</i> (Hochst.) Codd | Leaves; stem                        | Limonene, 1,8-cineole, $\gamma$ -terpinene, $\alpha$ -pinene, fenchone, $\alpha$ -terpineol, fenchyl alcohol, $\beta$ -caryophyllene, perillyl alcohol endo-fenchol, camphor, borneol, terpinen-4-ol, geraniol, thymol, $\alpha$ -copaene, $\beta$ -caryophyllene, $\alpha$ -trans-bergamotene, $\gamma$ -gurjunene, $\alpha$ -muurolene, germacrene D, $\alpha$ -humulene, viridiflorol, isopimara- 8,15-diene , manoyl oxide.                                                                                                                                                                                                                                                                                                                                                                                                                                          | Ghuman et al., 2019; Garzoli et al. 2022; Shimira 2022;                                                                                                                                                                                        |
| <i>Thymbra capitata</i> (L.) Cav.        | Aerial parts                        | Carvacrol; thymol; p-cymene, $\gamma$ -terpinene; linalool; $\beta$ -caryophyllene; $\alpha$ -thujene, $\alpha$ -pinene, $\beta$ -myrcene, $\alpha$ -terpinene, camphene, 3-octanone, $\beta$ -pinene, $\alpha$ -phellandrene, 3-carene, terpinen-4-ol, $\alpha$ -terpineol, carvacrol methyl ether, $\alpha$ -humulene, ledene, $\beta$ -bisabolene, $\delta$ -cadinene, caryophyllene oxide, rosmarinic acid-O-hexoside, syringaresinol-O-hexoside, hesperidin, rosmarinic acid, salvianolic acid, , salvianolic acid A, oxo-dihydroxy-octadecenoic acid, naringenin, apigenin, trihydroxy-octadecenoic acid. 6-hydroxyluteolin, 4-tert-butyl catechol, vanillic, acid, protocatechuic acid, taxifolin, eriodictyol, 6-hydroxyluteolin 7,3'-dimethyl ether, aromadendrin, B/E, eriodictyol, luteolin, 6-hydroxyluteolin, 7,3',4'-trimethyl ether, ladanein, genkwanin. | Albano Miguel, 2011<br>Aazza et al., 2016<br>Taşkın et al., 2018<br>Aazza et al., 2016; Albano et al., 2011; Carrasco et al., 2016;<br>Llorent-Martínez et al., 2022;<br>Miguel et al., 2021; Saoulajan et al., 2022; Tsioutsiou et al., 2022. |
| <i>Thymbra spicata</i> L.                | Leaves, stems and flowers on button | Carvacrol, $\gamma$ -terpinene, p-cymene, $\beta$ -caryophyllene, thymol.                                                                                                                                                                                                                                                                                                                                                                                                                                                                                                                                                                                                                                                                                                                                                                                                | Güneş et al., 2017; Karakaş et al., 2022; Mendi et al., 2017;<br>Mohsenzadeh et al., 2016.                                                                                                                                                     |
| <i>Thymus albicans</i> Hoffmanns. & Link | Flowering parts                     | Tricyclene, $\alpha$ -pinene , camphene, sabinene, $\beta$ -pinene, dehydro-1,8-cineole, $\beta$ -myrcene, $\alpha$ -terpinene, p-cymene, limonene, trans-sabinene hydrate, camphor, geraniol, bornyl acetate, bornyl propionate. $\beta$ -caryophyllene, allo-aromadendrene, bicyclogermacrene, globulol, viridiflorol, ledol, trans-verbenol, $\delta$ -terpineol.                                                                                                                                                                                                                                                                                                                                                                                                                                                                                                     | Aazza et al. 2016; Roxo et al. 2020                                                                                                                                                                                                            |
| <i>Thymus caespititius</i> Brot.         | Flowers, stems and leaves           | Apigenin quercetin-O-glucoside A, luteolin-O-rutoside, apigenin-O-glucoside A, rosmarinic acid, $\alpha$ -thujene, $\alpha$ -pinene, sabinene, 1-octen-3-ol, $\beta$ -pinene, $\alpha$ -phellandrene, $\alpha$ -terpinene p-cymene, $\beta$ -phellandrene limonene, trans-sabinene hydrate, terpinolene, thymol, carvacrol, trans-dihydroagarofuran.                                                                                                                                                                                                                                                                                                                                                                                                                                                                                                                     | Aazza et al. 2016; Alonso et al. 2017                                                                                                                                                                                                          |

| Specie                                      | Plant part                | Phytochemistry                                                                                                                                                                                                                                                                                                                                                                                                                                                        | Reference                                                               |
|---------------------------------------------|---------------------------|-----------------------------------------------------------------------------------------------------------------------------------------------------------------------------------------------------------------------------------------------------------------------------------------------------------------------------------------------------------------------------------------------------------------------------------------------------------------------|-------------------------------------------------------------------------|
| <i>Thymus camphoratus</i> Hoffmanns. & Link | Aerial parts in flowering | $\alpha$ -thujene, $\alpha$ -pinene, camphene, sabinene, $\beta$ -pinene, myrcene, $\alpha$ -phellandrene $\alpha$ -terpinene, p-cymene, limonene, 1,8-cineole, Z-ocimene, $\gamma$ -terpinene, cis-linalool oxyde, $\alpha$ -campholenal camphor, E-pinocarveol, E-verbenol, myrtenal, $\alpha$ -terpineol, myrtenol, E-carveol, carvone, geraniol, bornyl acetate, $\alpha$ -terpinyl acetate, $\alpha$ -cubebene, geranyl acetate, E-caryophyllene, aromadendrene. | Albano Miguel 2011; Zuzarte et al. 2018                                 |
| <i>Thymus citriodorus</i> (Pers.) Schreb.   | Aerial parts              | 1, 8-cineole; geraniol                                                                                                                                                                                                                                                                                                                                                                                                                                                | Oliveira et al., 2022                                                   |
| <i>Thymus daenensis</i> Celak               | Aerial parts              | Thymol, carvacrol, linalool                                                                                                                                                                                                                                                                                                                                                                                                                                           | Akbarinia et al. 2008; Soosani Sazegar, 2018                            |
| <i>Thymus herbabaronia</i> Loisel.          | flowers, leaves and stems | Caffeic acid, eriodictyol-O-glucoside, quercetin-O-glucoside A, luteolin-C-glucoside A, rosmarinic acid, caffeic acid, thujene, pinene, camphene, 3-octanone, myrcene, 3-octanol, terpinene, p-cymene, limonene, terpinolene, linalool, borneol, thymol methyl ether, carvacrol methyl ether.                                                                                                                                                                         | Alfonso et al. 2017; Zuzarte et al. 2013                                |
| <i>Thymus linearis</i> Benth.               | Leaves and stems          | Thymol, p-cymene; germacrene-D, $\gamma$ -terpinene.                                                                                                                                                                                                                                                                                                                                                                                                                  | Chandra et al. 2016; Qadir et al. 2016                                  |
| <i>Thymus longicaulis</i> C. Presl          |                           | Terpinene, thymol, p-cymene; quinic acid; stachyose, 12-hydroxyjasmonic acid, lariciresinol O-dihexoside; rosmarinic acid O-hexoside, luteolin-O-hexoside, luteolin-O-pentoside, salvianolic acid K, luteolin-O-(acetylpentosyl)pentoside, methylapigenin, isosalvianolic acid, salvianolic acid K.                                                                                                                                                                   | Galasso et al., 2014                                                    |
| <i>Thymus praecox</i> Opiz                  | Aerial parts              | Chlorogenic acid, luteolin-7-O-glucoside, 3-O-feruloylquinic acid, quercetin-3-O-hexoside, apigenin-7-Oglucuronide                                                                                                                                                                                                                                                                                                                                                    | Cam et al. 2019; Taskin et al. 2019                                     |
| <i>Thymus quinquecostatus</i> Celak         |                           | Thymol, $\gamma$ -terpinene, p-cymene, geraniol, geranyl acetate, borneol, linalool, caryophyllene, anethole, carvacrol, 2-isopropyl-1-methoxy-4-methylbenzene, p-vinyl guaiacol, bicyclo [2.2.1] heptan-2-one, limonene, $\alpha$ -pinene, camphene, $\beta$ -myrcene, $\alpha$ -terpineol, ascabin                                                                                                                                                                  | Oh et al., 2008; Kim et al., 2022.                                      |
| <i>Thymus serpyllum</i> L.                  | Aerial parts              | Camphene; myrcene; 1,8-cineole; limonene; camphor; $\alpha$ -terpineol; linalyl acetate; geranyl acetate; $\beta$ -caryophyllene; germacrene D.                                                                                                                                                                                                                                                                                                                       | Raal et al., 2004; Ruiz-Malagón et al., 2022; Ruiz-Malagón et al. 2022b |

| Specie                                           | Plant part          | Phytochemistry                                                                                                                                                                                                                                                                                                                                                                                                                                                                                                                                                                                                                                                                                                                                                                                                     | Reference                                                                                 |
|--------------------------------------------------|---------------------|--------------------------------------------------------------------------------------------------------------------------------------------------------------------------------------------------------------------------------------------------------------------------------------------------------------------------------------------------------------------------------------------------------------------------------------------------------------------------------------------------------------------------------------------------------------------------------------------------------------------------------------------------------------------------------------------------------------------------------------------------------------------------------------------------------------------|-------------------------------------------------------------------------------------------|
| <i>Thymus armeniacus</i><br>Klokov & Des.-Shost. | Aerial parts        | Sevanol, luteolin-7-O-glucuronide, luteolin-7-O-glucurono-(1-6)glucoside, apigenin-7-O-glucuronide, luteolin, apigenin, apigenin-7-O-glucoside, luteolin-7-O-glucoside, caffeic acid, rosmarinic acid, p-coumaric acid, lamiuside A, verbascoside, nepetalactone, actinidine, iridomyrmecin, $\beta$ -caryophyllene, nerol, caryophyllene oxide, elemol, geraniol, geranial, 1,8-cineole, citronellol, citronellyl acetate, $\beta$ -sitosterol, $\alpha$ -amyrin, sitosterol $\beta$ -glucopyranoside, ursolic acid, piperitone, humulene oxide, dimethyl-3,7-oxa-1-bicyclo [3,3,0]oct-2-ene, hexenyl benzoato, thymol, sabinene, $\beta$ -farnesene, photocitral B, citronellal, menthol, lavandulol, rosefuran epoxide, E-isocitral, neral.                                                                     | Modnicki et al. 2007; Prescott et al., 2011; Pargaïen et al., 2020; Acimovic et al., 2022 |
| <i>Thymus broussonetii</i><br>Boiss.             | Whole plant; leaves | Borneol, p-cymene, carvacrol, camphene, $\alpha$ -terpinene, $\alpha$ -pinene, trans-sabinene hydrate, caryophyllene oxide, (E)- $\beta$ -caryophyllene, bornyl acetate, carvacrol methyl ether, camphor, linalool, cis-sabinene hydrate, 4-terpineol, p-cymen-8-ol, thymol, trans-verbenol, 1-octen-3ol, 1,8-cineol, $\beta$ -pinene, (E)- $\beta$ -caryophyllene, geraniol formate, p-menth-1,4(8)-diene, linalyl propionate, $\beta$ -cadrene, thujol, cinerone, 1-octen-3-ol, viridiflorene, borneol, $\gamma$ -terpinene, myrcene, camphene, $\alpha$ -thujene, aromadendrene, caryophyllene oxide, germacrene D, $\delta$ -cadinene, eucalyptol, $\tau$ -muurolol, $\gamma$ -cadinene, ledene, luteolin, thymonin, eriodictyol, luteolin-7-O-glucoside, luteolin-3'-O-glucuronide, eriodictyol-7-O-glucoside | Ismaili et al., 2002; Salehi e al., 2018; Naceiri et al., 2021; El Yaagoubi et al., 2021; |
| <i>Thymus carnosus</i><br>Boiss.                 | Aerial parts        | Santene, iso-citronelle, $\alpha$ -pinene, camphene, p-3-menthene, $\alpha$ -phellandrene, 2-acetyl-thiazole, limonene, 1,8-cineole, cis-arbuscolone, artemisia ketone, dihydro myrcenol, m-cymenene, terpinolene, linalool, myrcenol, 3-iso-thujanol, cis-verbenol, camphor, borneol, verbenone, trans-piperitol, trans-carveol, carvone, $\alpha$ -ylangene, bakerol, D-germacrene, neryl, vanillin acetate, flavesone, silphiperfol-5-en-3-ol, D-davanone, eremoligenol, 3-iso-thujopsanone, valerianol, cadelene, sesquicineol-2-one, methyl linoleate.                                                                                                                                                                                                                                                        | Nahak and Kanta, 2014; dos Santos et al., 2021; de Lima et al., 2014;                     |
| <i>Thymus kotschyanus</i><br>Boiss. & Hohen.     | leaves              | 3-octenol, trans-ocimene, methyl chavicol, cis-anethol, $\delta$ -elemene, $\alpha$ -copaene, $\beta$ -bourbonene, $\beta$ -cubenene, $\beta$ -elemene, methyl eugenol, trans-caryophyllene, $\beta$ -gurjunene, $\alpha$ -humulene, allo-aromadendrene, germacrene D, $\beta$ -selinene, $\alpha$ -(E, E)-farnesene, $\delta$ -cadinene.                                                                                                                                                                                                                                                                                                                                                                                                                                                                          | Moraes et al., 2002; Piva et al., 2021                                                    |
| <i>Thymus mastichina</i> L.                      | Aerial parts        | 1,8- cineole, $\alpha$ -pinene, camphene, sabinene, $\beta$ -pinene, camphor, $\gamma$ -terpinene, borneol, terpinen-4-ol, $\gamma$ -terpineol                                                                                                                                                                                                                                                                                                                                                                                                                                                                                                                                                                                                                                                                     | Albano Miguel 2011; Aazza et al., 2016; Oliveira et al., 2023                             |



| Specie                               | Plant part          | Phytochemistry                                                                                                                                                                                                                                                                                                                                                                                                                                                                                        | Reference                                                                                                                 |
|--------------------------------------|---------------------|-------------------------------------------------------------------------------------------------------------------------------------------------------------------------------------------------------------------------------------------------------------------------------------------------------------------------------------------------------------------------------------------------------------------------------------------------------------------------------------------------------|---------------------------------------------------------------------------------------------------------------------------|
| <i>Thymus sipyleus</i> Boiss.        |                     | rosmarinic acid, luteolin-7-O-glucoside, p-cymene, $\gamma$ -terpinene, trans-dihydrocarvone, $\gamma$ -muurolene, $\gamma$ -cadinene, caryophyllene oxide, (R)-5-isopropyl-2-methylcyclohexa-1,3-diene, $\alpha$ -thujene, carvacrol methyl ether, sabinene hydrate, $\beta$ -bisabolene, $\beta$ -caryophyllene, $\beta$ -phellandrene, crithmene, borneol, carvacryl acetate, camphene, isothymol, carvacrol, terpinolene, 1-octen-3-ol, 1-methyl-4-isopropenylbenzene, pinene, carvone, limonene. | Günes et al., 2017; Demirci et al., 2018; Ustuner et al., 2019; Llorente-Martínez et al., 2022                            |
| <i>Thymus pulegioides</i> L.         | Aerial parts        | Luteolin, apigenin, caffeic acid, rosmarinic acid.                                                                                                                                                                                                                                                                                                                                                                                                                                                    | Stalinska et al., 2005; Pavel et al., 2011                                                                                |
| <i>Thymus vulgaris</i> L.            | Aerial parts        | $\alpha$ -thujone; $\alpha$ -pinene; camphene; myrcene; p-cymene; $\alpha$ -terpinene; eucalyptol; sabinene hydrate; borneol; terpinen-4-ol; thymol.                                                                                                                                                                                                                                                                                                                                                  | Bacalbasa et al. 2022<br>Pandur et al., 2022                                                                              |
| <i>Zataria multiflora</i> Boiss.     | Aerial parts        | Thymol; carvacrol; linalool; p-cymene; $\gamma$ -terpinene; $\alpha$ -pinene; eucalyptol; $\beta$ -caryophyllene; borneol; 3-sitosterol; stigmasterol; oleanolic acid; betulinic acid; apigenin; luteolin.                                                                                                                                                                                                                                                                                            | Khazdair et al., 2018; Ghorani et al., 2022                                                                               |
| <i>Ziziphora clinopodioides</i> Lam. | Aerial part; leaves | Cinaroside; apiin; diosmine; linarin, crisin; tanshinone IIA; caffeic acid; luteolin; quercetin; baicalein; kaempferol; curcumin; piceatannol, Exo-2-hydroxy cineole; limonene dioxide; blumenol C; sabinene; limonene; eucalyptol; menthone; isomenthone; menthol.                                                                                                                                                                                                                                   | Chen et al., 2002; Shabbir et al., 2018; Ahmeda et al. 2020; Wu et al., 2020; Zhang et al., 2021; Ulikhanyan et al., 2022 |
| <i>Ziziphora tenuior</i> L.          | Aerial parts        | p-menth-3-en-8-ol, isomenthone, 8-hydroxymenthone.                                                                                                                                                                                                                                                                                                                                                                                                                                                    | Nabiuni et al., 2015; Abu-Darwish et al., 2016; Kianpour et al., 2021                                                     |

- Aazza, S.; El-Guendouz, S.; Miguel, M.G. (2016). Antioxidant, Anti-inflammatory and anti-hyperglycaemic activities of essential oils from *Thymbra capitata*, *Thymus albicans*, *Thymus caespititius*, *Thymus carnosus*, *Thymus lotocephalus* and *Thymus mastichina* from Portugal. *Natural Product Communications*, 11(7). doi:10.1177/1934578X1601100739
- Abbasloo, E.; Dehghan, F.; Khaksari, M.; Najafipour, H.; Vahidi, R.; Dabiri, S.; Sepehri, G.; Asadikaram, G. (2016). The anti-inflammatory properties of *Satureja khuzistanica* Jamzad essential oil attenuate the effects of traumatic brain injuries in rats. *Scientific Reports*, 6, 31866. doi.org/10.1038/srep31866
- Abdolmaleki, A.; Rajabi, A.; Sanginabadi, F. (2013). Evaluation of the analgesic and anti-inflammatory effects of aqueous extract of peppermint (*Mentha piperita*). *Scientific Journal of Kurdistan University of Medical Sciences* 18(1), 67-74.
- Abu-Darwish, M.S.; Cabral, C.; Ali, Z.; Wang, M.; Khan, S.I.; Jacob, M.R.; Efferth, T. (2020). *Salvia ceratophylla* L. from south of Jordan: New insights on chemical composition and biological activities. *Natural Products and Bioprospecting*, 10(5), 307-316. doi:10.1007/s13659-020-00259-9.
- Acero, N.; Ortega, T.; Villagrasa, V.; Leon, G.; Muñoz-Mingarro, D.; Castillo, E.; González-Rosende, M.E.; Borrás, S.; Rios, J.L.; Bosch-Morell, F.; Martínez-Solís, I. (2023). Phytotherapeutic alternatives for neurodegenerative dementias: Scientific review, discussion and therapeutic proposal. *Phytotherapy Research*, 37, 1176–1211. doi:10.1002/ptr.7727.
- Aćimović, M.; Šeregelj, V.; Simić, K.; Varga, A.; Pezo, L.; Vulić, J.; Čabarkapa, I. (2022). Chemical profile of *Nepeta cataria* l. var. *citriodora* Becker essential oil and in vitro evaluation of biological activities. *Acta Scientiarum Polonorum, Hortorum Cultus*, 21(4), 67–74. https://doi.org/10.24326/asphc.2022.4.7
- Adriana Estrella, G.R.; María Eva, G. T.; Alberto, H. L.; María Guadalupe, V. D.; Azucena, C. V.; Sandra, O. S.; Noé, A. V.; Francisco Javier, L. M. (2021). Limonene from *Agastache mexicana* essential oil produces antinociceptive effects, gastrointestinal protection and improves experimental ulcerative colitis. *Journal of Ethnopharmacology*, 280. https://doi.org/10.1016/j.jep.2021.114462.
- Afonso, A.F.; Pereira, O.R.; Fernandes, Â.S.F.; Calhelha, R.C.; Silva, A.M.S.; Ferreira, I.C.F.R.; Cardoso, S.M. (2019b). The health-benefits and phytochemical profile of *Salvia apiana* and *Salvia farinacea* var. *victoria* Blue decoctions. *Antioxidants* (Basel), 8(8):241. https://doi: 10.3390/antiox8080241. PMID: 31349575; PMCID: PMC6721217.
- Afonso, A.F.; Pereira, O.R., Neto, R.T., Silva, A.M.S., Cardoso, S.M. (2017). Health-Promoting Effects of *Thymus herba-barona*, *Thymus pseudolanuginosus*, and *Thymus caespititius* Decoctions. *International Journal of Molecular Sciences*, 2017, 18, 1879. doi:10.3390/ijms18091879 .
- Afonso, A. F., Pereira, O. R.; Fernandes, Â.; Calhelha, R. C.; Silva, A. M. S.; Ferreira, I. C. F.; Cardoso, S. M. (2019a). Phytochemical composition and bioactive effects of *Salvia africana*, *Salvia officinalis* and *Salvia mexicana* aqueous extracts. *Molecules*, 24(23) doi:10.3390/molecules24234327

- Ahmad, F.; Kamaraj, B.; Mohamed, J.M.M.; El-Sagheer, A.M.; Emam, A.S.A. (2022). Ethnopharmacological and phytochemical study of major species from Labiatae family in Saudi Arabia: A Systematic Review. *International Journal of Applied Pharmaceutics*, 14 (ThematicSpecial Issue), pp. 44–57. DOI: <https://dx.doi.org/10.22159/ijap.2022.v14ti.40>
- Ahmed, M.E.O.; Abdelgadir, A.A.; Ahmed, E.M. (2021). Traditional use of medicinal plants in Central Sudan Arabian. *Journal of Medicinal and Aromatic Plants*, 7(1), pp. 29–73. DOI: 10.48347/IMIST.PRSM/ajmap-v7i1.22273
- Ahmeda, A.; Mahdavi, B.; Zaker, F.; Kaviani, S.; Hosseini, S.; Zangeneh, M. M.; Zangeneh, A.; Paydarfar, S.; Moradi, R. (2020). Chemical characterization and anti-hemolytic anemia potentials of tin nanoparticles synthesized by a green approach for bioremediation applications. *Applied Organometallic Chemistry*, 34(3) e5433. doi.org/10.1002/aoc.5433
- Aihaiti, K.; Li, J.; Xu, N.-N.; Tang, D.; Aisa, H.A. (2023). Monoterpenoid derivatives from *Hyssopus cuspidatus* Boriss. and their bioactivities. *Fitoterapia*, 165, 105432. <https://doi.org/10.1016/j.fitote.2023.105432>
- Akbarinia, A.; Sharifi-Ashabadi, A.; Sefidkon, F. (2008). Influence of harvest dynamics on herb and oil yield of *Thymus kotschyanus* and *Thymus daenensis* cultivated at two sites. *Acta Horticulturae*, 786, pp. 229–234. Doi: 10.17660/ActaHortic.2008.786.25
- Akkol, E.K.; Göger, F.; Koşar, M.; Başer, K.H.C. (2008). Phenolic composition and biological activities of *Salvia halophila* and *Salvia virgata* from Turkey. *Food Chemistry*, 108(3), 942–949. doi.org/10.1016/j.foodchem.2007.11.071
- Akram, M.; Syed, A.S.; Kim, K.A.; Lee, J.S.; Chang, S.Y.; Kim, C.Y.; Bae, O.N. (2015). Heme oxygenase 1-mediated novel anti-inflammatory activities of *Salvia plebeia* and its active components. *Journal of Ethnopharmacology*, 174, 322–330. doi.org/10.1016/j.jep.2015.08.028
- Aladedunye, F.A.; Okorie, D.A.; Ighodaro, O.M. (2008). Anti-inflammatory and antioxidant activities and constituents of *Platostoma africanum* P. Beauv. *Natural Product Research*, 22(12), 1067–1073. doi.org/10.1080/14786410802264004
- Albano, S.M.; Miguel, M.G. (2011). Biological activities of extracts of plants grown in Portugal. *Industrial Crops and Products*, 33(2), 338–343. doi:10.1016/j.indcrop.2010.11.012
- Algieri, F.; Rodriguez-Nogales, A.; Vezza, T.; ...Rodriguez-Cabezas, M.E.; Galvez, J. (2016). Anti-inflammatory activity of hydroalcoholic extracts of *Lavandula dentata* L. and *Lavandula stoechas* L. *Journal of Ethnopharmacology*, 190, pp. 142–158. <https://doi.org/10.1016/j.jep.2016.05.063>
- Ali, T.; Javan, M.; Sonboli, A.; Semnanian, S. (2012). Antinociceptive and anti-inflammatory activities of the essential oil of *Nepeta crispa* Willd. in experimental rat models. *Natural Product Research*, 26(16), 1529–1534. doi.org/10.1080/14786419.2011.565284

- Ali-Shtayeh, M.S.; Abu-Zaitoun, S.Y.; Dudai, N.; Jamous, R.M. Downy lavender oil: a promising source of antimicrobial, antiobesity, and anti-Alzheimer's disease agents. *Evidence-Based Complementary and Alternative Medicine*, 2020, 5679408. doi: 10.1155/2020/5679408.
- Aljohani, A.S.M.; Alhumaydhi, F.; Rauf, A.; Hamad, E.; Rashid, U. (2022). *In Vivo* and *In Vitro* Biological Evaluation and Molecular Docking Studies of Compounds Isolated from *Micromeria biflora* (Buch. Ham. ex D.Don) Benth. *Molecules*, 27(11), 3377. doi.org/10.3390/molecules27113377
- Almeida-Bezerra, J.W.; Rodrigues, F.C.; Lima Bezerra, J.J.; Vieira Pinheiro, A.A.; Almeida De Menezes, S.; Tavares, A.B.; Costa, A.R.; Augusta De Sousa Fernandes, P.; Bezerra Da Silva, V.; Martins Da Costa, J.G.; Pereira Da Cruz, R.; Bezerra Moraes-Braga, M.F.; Melo Coutinho, H.D.; Teixeira De Albergaria, E.; Meiado, M.V.; Siyadatpanah, A.; Kim, B.; Moraes De Oliveira, A.F. (2022). Traditional Uses, Phytochemistry, and Bioactivities of *Mesosphaerum suaveolens* (L.) Kuntze. In *Evidence-based Complementary and Alternative Medicine*, 1-23 doi.org/10.1155/2022/3829180
- Al-Mijalli, S. H.; Mrabti, N.N.; Ouassou, H.; Sheikh, R.A.; Assaggaf, H.; Bakrim, S.; Abdallah, E.M.; Alshahrani, M.M.; Al Awadh, A.A.; Lee, L.H.; AlDhaheri, Y.; Sahebkar, A.; Zengin, G.; Attar, A.A.; Bouyahya, A.; Mrabti, H.N. (2022). Chemical Composition and Antioxidant, Antimicrobial, and Anti-Inflammatory Properties of *Origanum compactum* Benth Essential Oils from Two Regions: In Vitro and In Vivo Evidence and In Silico. *Molecular Investigations. Molecules*, 27(21). https://doi.org/10.3390/molecules27217329
- Alonazi M.A.; Jemel I.; Moubayed N.; Alwhibi M.; El-Sayed N.N.E.; Ben Bacha A. 2021. Evaluation of the *in vitro* anti-inflammatory and cytotoxic potential of ethanolic and aqueous extracts of *Origanum syriacum* and *Salvia lanigera* leaves. *Environmental Science and Pollution Research*, 28(16):19890-19900. https://doi: 10.1007/s11356-020-11961-z.
- Al-Taweela, A.M.; Raish, M.; Perveen, S.; Fawzy, G.H.; Ahmad, A.; Ansari, M.A.; Mudassarg, S.; Ganaie, M.A. (2017). *Nepeta deflersiana* attenuates isoproterenol-induced myocardial injuries in rats: Possible involvement of oxidative stress, apoptosis, inflammation through nuclear factor (NF)-κB downregulation. *Phytomedicine*, 34, 67–75. doi: http://dx.doi.org/10.1016/j.phymed.2017.08.003
- Álvarez-Santos, N.; Estrella-Parra, E.A.; Benítez-Flores, J. del C.; Serrano-Parrales, R.; Villamar-Duque, T.E.; Santiago-Santiago, M.A.; González-Valle, M. del R.; Avila-Acevedo, J.G.; García-Bores, A.M. (2022). *Asterohyptis stellulata*: Phytochemistry and wound healing activity. *Food Bioscience*, 50, 102150. doi.org/10.1016/j.fbio.2022.102150
- Alves-Silva, J.M.; Pedreiro, S.; Cavaleiro, C.; Figueirinha, A.; Salgueiro, L. (2023). Effect of *Thymbra capitata* (L.) Cav. on Inflammation, Senescence and Cell Migration. *Nutrients*, 15(8), 1930. https://doi.org/10.3390/nu15081930
- Alves-Soares, R.; de Oliveira, H.D.; Campos, D.D.C.O.; Leal-Cardoso, J.H.; Coelho-de-Souza, A.N. (2022). The Essential Oil of *Hyptis crenata* Inhibits the Increase in Secretion of Inflammatory Mediators. *Plants*, 11(22), 3048. https://doi.org/10.3390/plants11223048

- Al-Yousuf, M.H.; Bashir, A.K.; Ali, B.H.; Tanira, M.O.M.; Blunden, G. (2002). Some effects of *Salvia aegyptiaca* L. on the central nervous system in mice. *Journal of Ethnopharmacology*, 81, 121–127. [www.elsevier.com/locate/jethpharm](http://www.elsevier.com/locate/jethpharm)
- Alzweiri, M.; Sarhan, A.A.; Mansi, K.; Hudaib, M.; Aburjai, T. (2011). Ethnopharmacological survey of medicinal herbs in Jordan, the Northern Badia region. *Journal of Ethnopharmacology*, 137(1), pp. 27–35. [https://doi.org/10.1016/S0378-8741\(02\)00057-0](https://doi.org/10.1016/S0378-8741(02)00057-0)
- Amanlou, M.; Dadkhah, F.; Farsam, H.; Salehnia, A.; Dehpour, A. R. (2005). An anti-inflammatory and anti-nociceptive effect of hydroalcoholic extract of *Satureja khuzistanica* Jamzad extract. *Journal Pharmacology and Pharmaceutics Science*, 8(1), 102–106. [www.cspscanada.org](http://www.cspscanada.org)
- Aminian, A.R.; Mohebbati, R.; Boskabady, M.H. (2022). The Effect of *Ocimum basilicum* L. and Its Main Ingredients on Respiratory Disorders: An Experimental, Preclinical, and Clinical Review. *Frontiers in Pharmacology*, 12 805391. [doi.org/10.3389/fphar.2021.805391](https://doi.org/10.3389/fphar.2021.805391)
- Amira, S.; Dade, M.; Schinella, G.; Rios, J.-L. (2012). Anti-inflammatory, anti-oxidant, and apoptotic activities of four plant species used in folk medicine in the Mediterranean basin T cell leukemia control via Ras-Raf pathway inhibition with peptides View project Mediterranean Plants for Skin Inflammation and Psoriasis View project. *Article in Pakistan Journal of Pharmaceutical Sciences*, [www.researchgate.net/publication/51879323](http://www.researchgate.net/publication/51879323)
- Amirova, K.M.; Dimitrova, P.; Marchev, A.S.; Aneva, I.Y.; Georgiev, M.I. (2019). *Clinopodium vulgare* L. (wild basil) extract and its active constituents modulate cyclooxygenase-2 expression in neutrophils. *Food and Chemical Toxicology*, 124, pp. 1–9. <https://doi.org/10.1016/j.fct.2018.11.054>
- An, H.J.; Jeong, H.J.; Um, J.Y.; Kim, H.M.; Hong, S.H. (2006). *Glechoma hederacea* inhibits inflammatory mediator release in IFN- $\gamma$  and LPS-stimulated mouse peritoneal macrophages. *Journal of Ethnopharmacology*, 106(3), 418–424. [doi.org/10.1016/j.jep.2006.01.024](https://doi.org/10.1016/j.jep.2006.01.024)
- Andrade, J.M.; Custódio, L.; Romagnoli, A.; Reis, C.P.; Rodrigues, M.J.; Garcia, C.; Petruccioli, E.; Goletti, D.; Faustino, C.; Fimia, G.M.; Rijo, P. (2018). Antitubercular and anti-inflammatory properties screening of natural products from *Plectranthus* species. *Future medicinal chemistry*, 10(14), 1677–1691. <https://doi.org/10.4155/fmc-2018-0043>
- Andreyeva, A.A.; Sivtseva, V.V.; Pashayeva, A.T.; Chirikova, N.D.; Okhlopkova, Z.M.; Kim, S.W.; Huseynova, I.M.; Zulfugarov, I.S. (2020). Dragonhead as a model plant for biotechnology of biologically active compounds. *Azerbaijan Pharmaceutical and Pharmacotherapy Journal*, 1, 31-35.
- Anjos, K.S.D.; Araújo-Filho, H.G.; Duarte, M.C.; Costa, V.C.O.; Tavares, J.F.; Silva, M.S.; Almeida, J.R.G.S.; Souza, N.A.C.; Rolim, L.A.; Menezes, I.R.A.; Coutinho, H.D.M., Quintans, J.S. S.; Quintans-Júnior, L.J. (2017). HPLC-dad analysis, antinociceptive and anti-inflammatory properties of the ethanolic extract of *Hyptis umbrosa* in mice. *EXCLI Journal*, 16, 14–24. [doi.org/10.17179/excli2016-698](https://doi.org/10.17179/excli2016-698)

Antão, A.R.; Bangay, G.; Domínguez-Martín, E.M.; Díaz-Lanza, A.M.; Ríjo, P. (2021). *Plectranthus ecklonii* Benth.: A comprehensive review into its phytochemistry and exerted biological activities. *Frontiers in Pharmacology*, 12, 768268. doi: 10.3389/fphar.2021.768268.

Arenas-Chavez, C.A.; Wiche-Salinas, T.; Valencia-Mercado, I.; Calle-Valdez, R.; Vera-Gonzales, C.; Malaga-Contreras, S.; Huanqui-Guerra, C. Efecto antiinflamatorio de la fracción flavonoide de *Lepechinia meyenii* (Walp.) Epling (*Salvia*) sobre leucocitos de pacientes con artritis reumatoide. *Revista Peruana de Medicina Experimental y Salud Pública*, 35(1), 55-61 doi: 10.17843/rpmesp.2018.351.3600.

Asadi-Samani, M., Rafieian-Kopaei, M., Lorigooini, and Shirzad, H. (2018). A screening to determine total phenol and flavonoid content of some Iran's medicinal plants grown in Chaharmahal va Bakhtyari province. *Indian Journal of Natural Products and Resources*, 9(4): 296-302.

Asadollahi, M.; Firuzi, O.; Heidary Jamebozorgi, F.; Alizadeh, M.; Jassbi, A. R. (2019). Ethnopharmacological studies, chemical composition, antibacterial and cytotoxic activities of essential oils of eleven *Salvia* in Iran. *Journal of Herbal Medicine*, 17-18 doi:10.1016/j.hermed.2018.11.006

Azevedo, M.-M.; Pinheiro, C.; Dias, A.C.P.; Pinto-Ribeiro, F.; Baltazar, F. (2015). Impact of an educational hands-on project on the antimicrobial, antitumor and anti-inflammatory properties of plants on portuguese students' awareness, knowledge, and competences. *International Journal of Environmental Research and Public Health*, 12(3), pp. 2437–2453. <https://doi.org/10.3390/ijerph120302437>

Bacalbasa, N.; Balescu, I.; Stoica, C.; Pop, L.; Varlas, V.; Martac, C.; Voichitoiu, A.; Gaspar, B. (2022). The anti-inflammatory, anti-infectious and anti-cancerous effects of *Thymus vulgaris*. *Romanian Journal of Medical Practice*, 17, 21–23. doi.org/10.37897/RJMP. 2022.S3.6

Bakhtiarian, A.; Aarabi Moghaddam, F.; Zamani, M.M.; ...Farahanikia, B.; Khanavi, M. (2011). Anti-inflammatory effect of *Thymus kotschyanus* Boiss. Hohen. extract on rats hind paw edema induced by carrageenan. *Journal of Medicinal Plants*, 10(37), pp. 25–32.

Banerjee, P.; Kumar, T.; Sarangi, S.C.; Meetei, U.D.; Devi, A.S.; Kumar, R. (2021). Anti-inflammatory potential of aqueous extract of *Elsholtzia stachyodes* on experimental models of inflammation in rats. *Journal of Natural Science, Biology and Medicine*, 12(1), 103–108. doi.org/10.4103/jnsbm.JNSBM\_5\_20

Banno, N.; Akihisa, T.; Tokuda, H.; Yasukawa, K.; Higashihara, H.; Ukiya, M.; Watanabe, K.; Kimura, Y.; Hasegawa, J.-I.; Nishino, H. (2004). Triterpene Acids from the Leaves of *Perilla frutescens* and Their Anti-inflammatory and Antitumor-promoting Effects. *Bioscience, Biotechnology and Biochemistry*, 68(1), 85–90.

Batista, D.; Falé, P.L.; Serralheiro, M.L.; Araújo, M.E., Dias; C., Branco, I.; Grosso, C.; Coelho, J.; Palavra, A.; Madeira, P.J.A.; Martins, A.; Rauter, A.P. (2017). Phytochemical Characterization and Biological Evaluation of the Aqueous and Supercritical Fluid Extracts from *Salvia sclareoides* Brot. *Open Chemistry*, 15(1), 82–91. doi.org/10.1515/chem-2017-0011

- Bayat, M.; Kalantar, K.; Amirghofran, Z. (2019). Inhibition of interferon- $\gamma$  production and T-bet expression by menthol treatment of human peripheral blood mononuclear cells. *Immunopharmacology and Immunotoxicology*, 41(2), 267–276. doi.org/10.1080/08923973.2019.1588294
- Becker, K.; Schwaiger, S.; Waltenberger, B.; Fuchs, D.; Pezzei, C. K.; Schennach, H.; Stuppner, H.; Gostner, J. M. (2018). Immunomodulatory Effects of Diterpene Quinone Derivatives from the Roots of *Horminum pyrenaicum* in Human PBMC. *Oxidative Medicine and Cellular Longevity*, 2018. doi.org/10.1155/2018/2980295
- Belozerova, O.A.; Osmakov, D.I.; Vladimirov, A.; Koshelev, S.G.; Chugunov, A.O.; Andreev, Y.A.; Palikov, V.A.; Palikova, Y.A.; Shaykhutdinova, E.R.; Gvozd, A.N.; et al. (2020). Sevanol and Its Analogues: Chemical Synthesis, Biological Effects and Molecular Docking. *Pharmaceuticals*, 13, 163. https://doi.org/10.3390/ph13080163
- Benrezzouk, R.; Terencio, M.C.; Ferrandiz, M.L.; Hernandez-Perez, M.; Rabanal, R.; Alcaraz, M. J. (2001). Inhibition of 5-lipoxygenase activity by the natural anti-inflammatory compound aethiopinone. *Inflammation Research*, 50(2), 96-101. doi:10.1007/s000110050730.
- Beserra-Filho, J.I.A.; de Macêdo, A.M.; Leão, A.H.F.F.; Bispo, J.M.M.; Santos, J.R.; de Oliveira-Melo, A.J.; Passos Menezes, P.D.; Duarte, M.C.; de Souza Araújo, A.A., Silva, R.H.; Quintans-Júnior, L.J.; Ribeiro, A.M. (2019). *Eplingiella fruticosa* leaf essential oil complexed with  $\beta$ -cyclodextrin produces a superior neuroprotective and behavioral profile in a mice model of Parkinson's disease. *Food and Chemical Toxicology*, 124, 17–29. https://doi.org/10.1016/j.fct.2018.11.056.
- Bhardwaj, S.; Bhatia, S. (2020). Development and characterization of niosomal gel system using *Lallementia royaleana* Benth. mucilage for the treatment of rheumatoid arthritis. *Iranian Journal of Pharmaceutical Research*, IJPR, 19(3), 465–482. doi.org/10.22037/ijpr.2020.112887.14003
- Bian, J.; Wang, K.; Wang, Q.; Wang, P.; Wang, T.; Shi, W.; Ruan, Q. (2020). *Dracocephalum heterophyllum* (DH) exhibits potent anti-proliferative effects on autoreactive CD4+ T cells and ameliorates the development of experimental autoimmune uveitis. *Frontiers in Immunology*, 11:575669. doi: 10.3389/fimmu.2020.575669
- Bian, M.; Zhang, Y.; Du, X.; Xu, J.; Cui, J.; Gu, J.; Zhu, W.; Zhang, T.; Chen, Y. (2017). Apigenin-7-diglucuronide protects retinas against bright light-induced photoreceptor degeneration through the inhibition of retinal oxidative stress and inflammation. *Brain Research*, 1663, 141–150. doi.org/10.1016/j.brainres.2017.03.019
- Bonesi, M.; Loizzo, M.R.; Acquaviva, R.; Malfa, G.A.; Aiello, F.; Tundis, R. (2017). Anti-inflammatory and antioxidant agents from *Salvia* genus (Lamiaceae): An assessment of the current state of knowledge. *Anti-Inflammatory and Anti-Allergy Agents in Medicinal Chemistry*, 16(2), 70-86. doi:10.2174/1871523016666170502121419
- Bonito, M.C.; Cicala, C.; Marcotullio, M.C.; Maione, F.; Mascolo, N. (2011). Biological activity of bicyclic and tricyclic diterpenoids from *Salvia* species of immediate pharmacological and pharmaceutical interest. *Natural Product Communications*, 6(8), 1205-1215. doi:10.1177/1934578x1100600839

- Borges, R.S.; Ortiz, B.L.S.; Pereira, A.C.M.; Keita, H.; Carvalho, J.C.T. (2019). *Rosmarinus officinalis* essential oil: A review of its phytochemistry, anti-inflammatory activity, and mechanisms of action involved. *Journal of Ethnopharmacology*, 229, 29–45. Elsevier Ireland Ltd. <https://doi.org/10.1016/j.jep.2018.09.038>
- Botrel, P.P.; Pinto, J.E.B.P.; Ferraz, V.; Bertolucci, S.K.V.; Figueiredo, F.C. (2010). Teor e composição química do óleo essencial de *Hyptis marrubiioides* Epl., Lamiaceae em função da sazonalidade. *Acta Scientiarum - Agronomy*, 32(3), 533–538. [doi.org/10.4025/actasciagron.v32i3.3415](https://doi.org/10.4025/actasciagron.v32i3.3415)
- Boukhary, R.; Raafat, K.; Ghoneim, A.I.; Aboul-Ela, M.; El-Lakany, A. (2016). Anti-Inflammatory and Antioxidant Activities of *Salvia fruticosa*: An HPLC Determination of Phenolic Contents. *Evidence-Based Complementary and Alternative Medicine*, 2016. [doi.org/10.1155/2016/7178105](https://doi.org/10.1155/2016/7178105)
- Bounihi, A.; Hajjaj, G.; Alnamer, R.; Cherrah, Y.; Zellou, A. (2013). In vivo potential anti-inflammatory activity of *Melissa officinalis* L. essential oil. *Advances in Pharmacological Sciences*, 2013. [doi.org/10.1155/2013/101759](https://doi.org/10.1155/2013/101759)
- Bouyahya, A.; Chamkhi, I.; Menyiy, N.E.; Simal-Gandara, J.; El Omari, N. (2023). Traditional use, phytochemistry, toxicology, and pharmacological properties of *Lavandula dentata* L.: A comprehensive review. *South African Journal of Botany*, 154, pp. 67–87.
- Brahmi, F.; Nury, T.; Debbabi, M.; Hadj-Ahmed, S.; Zarrouk, A.; Prost, M.; Madani, K.; Boulekbache-Makhlouf, L.; Lizard, G. (2018). Evaluation of antioxidant, anti-inflammatory and cytoprotective properties of ethanolic mint extracts from Algeria on 7-ketocholesterol-treated murine RAW 264.7 macrophages. *Antioxidants*, 7(12), 1-15. [doi.org/10.3390/antiox7120184](https://doi.org/10.3390/antiox7120184)
- Burk, D.R.; Senechal-Willis, P.; Lopez, L.C.; Hogue, B.G.; Daskalova, S.M. (2009). Suppression of lipopolysaccharide-induced inflammatory responses in RAW 264.7 murine macrophages by aqueous extract of *Clinopodium vulgare* L. (Lamiaceae). *Journal of Ethnopharmacology*, 2009, 126(3), pp. 397–405.
- Cai, X.; Mao, Y.; Shen, X.; ...He, J.; Zhang, M. (2023). The extract from *Hyssopus cuspidatus* Boriss. Prevents bronchial airway remodeling by inhibiting mouse bronchial wall thickening and hASMC proliferation and migration. *Journal of Ethnopharmacology*, 2023, 303, 116047.
- Calvo, M.I.; Cavero, R.Y. (2015). Medicinal plants used for neurological and mental disorders in Navarra and their validation from official sources. *Journal of Ethnopharmacology*, 169, pp. 263–268.
- Cam M.E.; Hazar-Yavuz A.N.; Yildiz S.; Ertas B.; Ayaz Adakul B.; Taskin T.; Alan S.; Kabasakal L. (2019). The methanolic extract of *Thymus praecox* subsp. *skorpilii* var. *skorpilii* restores glucose homeostasis, ameliorates insulin resistance and improves pancreatic  $\beta$ -cell function on streptozotocin/nicotinamide-induced type 2 diabetic rats. *Journal of Ethnopharmacology*, 231 (2019) 29–38. <https://doi.org/10.1016/j.jep.2018.10.028>.



- Carbone C.; Martins-Gomes C.; Caddeo C.; Silva A.M.; Musumeci T.; Pignatello R.; Puglisi G.; Souto E.B. (2018). Mediterranean essential oils as precious matrix components and active T ingredients of lipid nanoparticles. *International Journal of Pharmaceutics*, 548 (2018) 217–226. doi.org/10.1016/j.ijpharm.2018.06.064
- Cardia, G.F.E.; Silva-Filho, S.E.; Silva, E.L.; Uchida, N.S.; Cavalcante, H.A.O.; Cassarotti, L.L.; Salvadego, V.E.C.; Spironello, R.A.; Bersani-Amado, C.A.; Cuman, R.K.N. (2018). Effect of Lavender (*Lavandula angustifolia*) Essential Oil on Acute Inflammatory Response. *Evidence-Based Complementary and Alternative Medicine*, 2018. doi.org/10.1155/2018/1413940.
- Cariddi, L.N.; González-Pereyra, M.L.; Gambero, M.L.; Demo, M.S.; Isola, M.C.; Franzoni, L.; Sabini, L.I.; Maldonado, A.M. (2006). *Minthostachys verticillata* (Griseb.) Epling: A South American plant with antiinflammatory effect *in vitro*. *Allergy and Clinical Immunology International*, 18(6), 234–241. https://doi.org/10.1027/0838-1925.18.6.234.
- Carrasco, A.; Martinez-Gutierrez, R.; Tomas, V.; Tudela, J. (2015). *Lavandula angustifolia* and *Lavandula latifolia* Essential Oils from Spain: Aromatic Profile and Bioactivities. *Planta Medica*, 82(1-2), pp. 163–170.
- Carrasco, A.; Perez, E.; Cutillas, A.; Martinez-Gutierrez, R.; Tomas, V.; Tudela, J. (2016). *Origanum vulgare* and *Thymbra capitata* essential oils from spain: Determination of aromatic profile and bioactivities. *Natural Product Communications*, 11(1), 113-120. doi:10.1177/1934578x1601100133
- Castro, J.P.; Franco, L.A.; Diaz, F. (2021). Anti-inflammatory screening of plant species from the Colombian Caribbean Coast. *Journal of Applied Pharmaceutical Science*, 11(4), 106-117. doi: 10.7324/JAPS.2021.110413.
- Ceschel, G.C.; Maffei, P.; Moretti, M.D.L.; Demontis, S.; Peana, A.T. (2000). *In vitro* permeation through porcine buccal mucosa of *Salvia desoleana* atzei and picci essential oil from topical formulations. *International Journal of Pharmaceutics*, 195(1-2), 171-177. doi:10.1016/S0378-5173(99)00381-6
- Chan, H.H.; Hwang, T.L.; Su, C.R.; Reddy, M.V.B.; Wu, T.S. (2011). Anti-inflammatory, anticholinesterase and antioxidative constituents from the roots and the leaves of *Salvia nipponica* Miq. var. *formosana*. *Phytomedicine*, 18(2–3), 148–150. doi.org/10.1016/j.phymed.2010.06.017
- Chang, C.T.; Soo, W.N.; Chen, Y.H.; Shyur, L.F. (2019). Essential Oil of *Mentha aquatica* var. *kenting* water mint suppresses two-stage skin carcinogenesis accelerated by BRAF inhibitor vemurafenib. *Molecules*, 24(12). https://doi.org/10.3390/molecules24122344
- Chen, J.; Wang, J.B.; Yu, C.H.; Chen, L.Q.; Xu, P.; Yu, W.Y. (2013). Total flavonoids of *Mosla scabra* leaves attenuates lipopolysaccharide-induced acute lung injury via down-regulation of inflammatory signaling in mice. *Journal of ethnopharmacology*, 148(3), 835–841. doi.org/10.1016/j.jep.2013.05.020

- Chen, S.; Fang, A.; Zhong, Y.; Tang, J. (2022). *Ziziphora clinopodioides* Lam leaf aqueous extract mediated novel green synthesis of iron nanoparticles and its anti-hemolytic anemia potential: A chemobiological study. *Arabian Journal of Chemistry*, 15(3), 103561. doi.org/10.1016/j.arabjc.2021.103561
- Chen, S.; Lin, Z.; Qin, G.; Sun, H.; Chen, Y. (1999). Diterpenoids from *Isodon leucophyllus*. *Planta Medica*, 65(5), 472–474.
- Chen, X.; Zhang, L.; Qian, C.; Du, Z.; Xu, P.; Xiang, Z. (2020). Chemical compositions of essential oil extracted from *Lavandula angustifolia* and its prevention of TPA-induced inflammation. *Microchemical Journal*, 153. doi.org/10.1016/j.microc.2019.104458
- Cheng, E.; Chi, J.; Li, Y.X.; Zhang, W.J.; Huang, N.; Wang, Z.M.; Dai, L.P.; Xu, E.P. (2022). Diverse ent-kaurane diterpenoids from *Isodon henryi*. *Tetrahedron Letters*, 108. doi.org/10.1016/j.tetlet.2022.154119
- Choia, H.; Kim, T.; Kim, S.-H.; Kim, J. (2016). Anti-allergic inflammatory triterpenoids isolated from the spikes of *Prunella vulgaris*. *Natural Product Communications*, 11(1), 2–31.
- Chou, S.; Lai, C.; Lai, C.; Chao, W. (2018). Chemical composition, antioxidant, anti-melanogenic and anti-inflammatory activities o *Glechoma hederacea* (Lamiaceae) essential oil. *Industrial Crops and Products* 122, 675-685. doi.org/10.1016/j.indcrop.2018.06.032.
- Choudhary, M.I.; Siddiqui, Z.A.; Nawaz, S.A.; Atta-ur-Rahman. (2006). Microbial transformation and butyrylcholinesterase inhibitory activity of (-)-caryophyllene oxide and its derivatives. *Journal of Natural Products*, 69(10), pp. 1429–1434.
- Cigremis, Y.; Ulukanli, Z.; Ilcim, A.; Akgoz, M. (2010). *In vitro* antioxidant and antimicrobial assays of acetone extracts from *Nepeta meyeri* Benth. *European Review for Medical and Pharmacological Sciences*, 14, 661–668.
- Coelho, M.N.; Soares, P.A.G.; Frattani, F.S.; Camargo, L.M.M.; Tovar, A.M.F.; de Aguiar P.F.; Zingali R.B.; Mourão P.A.S.; Costa S.S. Polysaccharide composition of an anticoagulant fraction from the aqueous extract of *Marsypianthes chamaedrys* (Lamiaceae). *International Journal of Biological Macromolecules*, 145 (2020) 668–681. doi.org/10.1016/j.ijbiomac.2019.12.176 0141-8130/.
- Coelho-De-souza, A.N.; Alves-Soares, R.; Oliveira, H.D.; Guimarães-Pereira, J.; Leal-Cardoso, J.H. (2021). The essential oil of *Hyptis crenata* Pohl ex Benth. Presents an antiedematogenic effect in mice. *Brazilian Journal of Medical and Biological Research*, 54(3), pp. 1–9, e9422
- Contreras, M.D.M.; Algieri, F.; Rodriguez-Nogales, A.; Gálvez, J.; Segura-Carretero, A. (2018). Phytochemical profiling of anti-inflammatory *Lavandula* extracts via RP–HPLC–DAD–QTOF–MS and –MS/MS: Assessment of their qualitative and quantitative differences. *Electrophoresis*, 2018, 39(9-10), pp. 1284–1293.

- Côté, H.; Pichette, A.; St-Gelais, A.; Legault, J. (2021). The biological activity of *Monarda didyma* L. essential oil and its effect as a diet supplement in mice and broiler chicken. *Molecules*, 26, 3368. doi: <https://doi.org/10.3390/molecules26113368>.
- Dadkhah, A.; Fatemi, F.; Rasooli, A.; Malayeri, M.R.M., Torabi, F. (2018). Assessing the effect of *Mentha longifolia* essential oils on cox-2 expression in animal model of sepsis induced by caecal ligation and puncture. *Pharmaceutical Biology*, 56(1), 495–504. doi.org/10.1080/13880209.2018.1510972
- Dal Piaz F.; Imparato S.; Lepore L.; Bader A.; De Tommasi N. 2010. A fast and efficient LC-MS/MS method for detection, identification and quantitative analysis of bioactive sesterterpenes in *Salvia dominica* crude extracts. *Journal Pharmaceutical Biomedical Analysis*, 51(1):70-77. <https://10.1016/j.jpba.2009.08.006>.
- Darabad, A.; Rahimi, M.; Rafati, H. (2022). Continuous hydrodistillation-ultrasonication flow batch-mode operation system to enhance essential oil extraction from *Satureja khuzistanica* and evaluation of in vitro anti-inflammatory activity. *Industrial Crops and Products*, 188(A), 115540. doi.org/10.1016/j.indcrop.2022.115540
- De Felice A.; Bader A.; Leone A.; Sosa S.; Loggia R.D.; Tubaro A.; De Tommasi N. 2006. New polyhydroxylated triterpenes and anti-inflammatory activity of *Salvia hierosolymitana*. *Planta Medica* 72(7):643-649. <https://doi: 10.1055/s-2006-931573>
- De Jesus, N.Z.T.; Lima, J.C.D.S.; Da Silva, R.M.; Espinosa, M.M.; Martins, D.T.D.O. (2009). Ethnobotanical survey of plants popularly used as anti-ulcer and anti-inflammatory in Pirizal, Nossa Senhora do Livramento, MT, Brazil | Levantamento etnobotânico de plantas popularmente utilizadas como antiúlcera e antiinflamatórias pela comunidade de Pirizal, Nossa Senhora do Livramento-MT, Brasil. *Revista Brasileira de Farmacognosia*, 19(1 A), pp. 130–139.
- De Lima, M.N.N.; Guimarães, B.A.; de Castro, A.L.S.; ...Maia, J.G.S.; Figueiredo, P.L.B. (2023). Chemical composition and antinociceptive and anti-inflammatory activity of the essential oil of *Hyptis crenata* Pohl ex Benth. from the Brazilian Amazon. *Journal of Ethnopharmacology*, 300, 115720.
- De Lima, V.T.; Vieira, M.C.; Kassuya, C.A.L.; Cardoso, C.A.L.; Alves, J.M.; Foglio, M.A.; De Carvalho, J.E.; Formagio, A.S.N. (2014). Chemical composition and free radical-scavenging, anticancer and anti-inflammatory activities of the essential oil from *Ocimum kilimandscharicum*. *Phytomedicine*, 21(11), 1298–1302. <https://doi.org/10.1016/j.phymed.2014.07.004>.
- De Macedo, L.M.; Dos Santos, É.M.; Militão, L.; Tundisi, L.L.; Ataíde, J.A.; Souto, E.B.; Mazzola, P.G. (2020). Rosemary (*Rosmarinus officinalis* L., syn. *salvia rosmarinus* Spenn.) and its topical applications: A review. *Plants*, 9, 5. MDPI AG. <https://doi.org/10.3390/plants9050651>.
- De Oliveira Ferreira, E.; Soares Dias, M.Y.; Rocha de Lima, N.M.; Tavares Neves, K.R.; Santos do Carmo, M.R.; Viana Lima, F.A.; Aragão Fonteles, A.; Fontenele Menezes, A.P.; Matos de Andrade, G. (2016). Neuroinflammatory response to experimental stroke is inhibited by eriodictyol. *Behavioural Brain Research*, 312, 321-332. <http://dx.doi.org/10.1016/j.bbr.2016.06.046>.

- De Pinho, J.P.M.; Silva, A.S.B.; Pinheiro, B.G.; ...Da Cunha Sousa, P.J.; Magalhães, P.J.C. (2012). Antinociceptive and antispasmodic effects of the essential oil of *Ocimum micranthum*: Potential anti-inflammatory properties. *Planta Medica*, 78(7), pp. 681–685.
- De Sousa Araújo, T.A.; Alencar, N.L.; de Amorim, E.L.C.; de Albuquerque, U.P. (2008). A new approach to study medicinal plants with tannins and flavonoids contents from the local knowledge. *Journal of Ethnopharmacology*, 120(1), pp. 72–80.
- Demirci, F.; Karaca, N.; Tekin, M.; Demirci, B. (2018). Anti-inflammatory and antibacterial evaluation of *Thymus sipyleus* Boiss. subsp. *sipyleus* var. *sipyleus* essential oil against rhinosinusitis pathogens. *Microbial Pathogenesis*, 122, pp. 117–121.
- Demirci, F.; Karadağ, A.E.; Biltekin, S.N.; Demirci, B. (2021). In Vitro ACE2 and 5-LOX Enzyme Inhibition by Menthol and Three Different Mint Essential Oils. *Natural Product Communications*, 16(11). doi.org/10.1177/1934578X211055014
- Deng, Y.; Hua, J.; Wang, W.; Zhan, Z.; Wang, A.; Luo, S. (2018). Cytotoxic terpenoids from the roots of *Dracocephalum taliense*. *Molecules*, 23(1). doi.org/10.3390/molecules23010057
- Dobrev, H.P. (2021). Treatment of numerous hand warts with *Clinopodium vulgare* tea. *Wiener Medizinische Wochenschrift*, 171(3-4), pp. 82–83.
- Donatello, N.N.; Emer, A.A.; Salm, D.C.; Ludtke, D.D.; Bordignon, S.A.S.R.; Ferreira, J.K.; Salgado, A.S.I.; Venzke, D.; Bretanha, L.C.; Micke, G.A.; Martins, D.F. (2020). *Lavandula angustifolia* essential oil inhalation reduces mechanical hyperalgesia in a model of inflammatory and neuropathic pain: The involvement of opioid and cannabinoid receptors. *Journal of Neuroimmunology*, 340. doi.org/10.1016/j.jneuroim.2020.577145
- Dos Santos, E.; Leitão, M.M.; Agüero Ito, C.N.; Silva-Filho, S.E.; Arena, A.C.; Silva-Comar, F.M. de S.; Nakamura Cuman, R.K.; Oliveira, R.J.; Nazari Formagio, A.S. Leite Kassuya, C. A. (2021). Analgesic and anti-inflammatory articular effects of essential oil and camphor isolated from *Ocimum kilimandscharicum* Gürke leaves. *Journal of Ethnopharmacology*, 269. https://doi.org/10.1016/j.jep.2020.113697
- Draginic, N.; Andjic, M.; Jeremic, J.; Zivkovic, V.; Kocovic, A.; Tomovic, M.; Bozin, B.; Kladar, N.; Bolevich, S.; Jakovljevic, V.; Milosavljevic, I. (2022). Anti-inflammatory and Antioxidant Effects of *Melissa officinalis* Extracts: A Comparative Study. *Iranian Journal of Pharmaceutical Research*, 21(1). doi.org/10.5812/ijpr-126561
- Du, Y.; Jin, Y.; Liu, P.; Shi, X.; Xu, H.; Wang, Q.; Zhang, L. (2013). Quantitative analysis of ten diterpenoids in rat bile after oral administration of *Isodon rubescens* extract by high performance liquid chromatography-electrospray ionization tandem mass spectrometry. *Journal of Liquid Chromatography and Related Technologies*, 36(9), 1264–1279. doi.org/10.1080/10826076.2012.686137

- Dubinnyi, M.A.; Osmakov, D.I.; Koshelev, S.G.; ...Arseniev, A.S.; Grishin, E.V. 2012. Lignan from thyme possesses inhibitory effects on ASIC3 channel current. *Journal of Biological Chemistry*, 287(39), pp. 32993–33000.
- Eidi, A.; Eidi, T.M.M.; Mozaffarian, V.; Rustaiyan A.; Mazooji A.S.; Khaboori Z.; Nabiuni F. 2011. Antinociceptive and Anti-inflammatory Effects of Ethanolic Extract of *Salvia syriaca* L. in Mice. *International Journal of Pharmacology*, 7(3): 394-399, 2011 DOI: 10.3923/p.2011.394.399
- El Kharraf, S.; El-Guendouz, S.; Farah, A.; Bennani, B.; Mateus, M.C.; El Hadrami, E.M.; Miguel, M.G. (2021). Hydrodistillation and simultaneous hydrodistillation-steam distillation of *Rosmarinus officinalis* and *Origanum compactum*: Antioxidant, anti-inflammatory, and antibacterial effect of the essential oils. , 168. <https://doi.org/10.1016/j.indcrop.2021.113591>.
- El Menyiy, N.; Mrabti, H.N.; el Omari, N.; Bakili, A.E.I.; Bakrim, S.; Mekkaoui, M.; Balahbib, A.; Amiri-Ardekani, E.; Ullah, R.; Alqahtani, A.S.; Shahat, A.A.; Bouyahya, A. (2022). Medicinal Uses, Phytochemistry, Pharmacology, and Toxicology of *Mentha spicata*. In *Evidence-based Complementary and Alternative Medicine* (Vol. 2022). Hindawi Limited. [doi.org/10.1155/2022/7990508](https://doi.org/10.1155/2022/7990508)
- El Sawi, S.A.; Sleem, A.A.; Merghany, R.M. 2021. *In vivo* antioxidant, anti-inflammatory and anti-hyperglycemic effects of *Salvia splendens* aerial parts in male albino rat models. *Journal of Herbs, Spices Medicinal Plants*, 27(2): 149-160. <https://doi.org/10.1080/10496475.2021.1891173>.
- El Yaagoubi, M.; Mechqoq, H.; El Hamdaoui, A.; ...Msanda, F.; El Aouad, N. (2021). A review on Moroccan *Thymus* species: Traditional uses, essential oils chemical composition and biological effects. *Journal of Ethnopharmacology*, 278, 114205.
- El-Askary, H.; El-Kashoury, E.; Kandil, Z.; Salem, M.; Sleem, A. (2012). Chemical composition and biological activities of the essential oil of *Mentha suaveolens* Ehrh. *Z. Naturforsch*, 67(3), 571–579.
- Esquivel, B.; Bustos-Brito, C.; Sánchez-Castellanos, M.; Nieto-Camacho, A.; Ramírez-Apan, T.; Joseph-Nathan, P.; Quijano, L. (2017). Structure, absolute configuration, and antiproliferative activity of Abietane and Icetexane diterpenoids from *Salvia ballotiflora*. *Molecules*, 22(10), 1690. doi: 10.3390/molecules22101690.
- Estakhr, J.; Javdan, N. (2011). Evaluation of anti-inflammatory effects of ethanolic extract of *Salvia hypoleuca*. *Pharmacologyonline*, 2, 879-885.
- Estakhr, J.; Javdan, N. (2011a). *Salvia hypoleuca*; a new source of compounds which are useful for treatment of ocular inflammation. *Pharmacologyonline*, 3, 338-346. Retrieved from [www.scopus.com](http://www.scopus.com)

- Fawole, O.A.; Amoo, S.O.; Ndhlala, A.R.; Light, M.E.; Finnie, J. F.; van Staden, J. (2010). Anti-inflammatory, anticholinesterase, antioxidant, and phytochemical properties of medicinal plants used for pain-related ailments in South Africa. *Journal of Ethnopharmacology*, 127(2), 235–241. doi.org/10.1016/j.jep.2009.11.015
- Feng, J.; Liu, L.; Yao, F.; Zhou, D.; He, Y.; Wang, J. (2021). The protective effect of tanshinone IIA on endothelial cells: a generalist among clinical therapeutics. *Expert Review of Clinical Pharmacology*, 14(2), 239–248. doi.org/10.1080/17512433.2021.1878877
- Feng, X.; Wang, X.; Liu, Y.; Di, X. (2015). Linarin Inhibits the Acetylcholinesterase Activity In-vitro and Ex-vivo. In *Shaheed Beheshti University of Medical Sciences and Health Services Iranian Journal of Pharmaceutical Research*, 14(3), 949-954.
- Fiuza, T.; Rezende M.; Sabóia-Morais, S.; Tresvenzol, L.; Ferreira H.; Paula, J. 2008. Estudo das folhas e caule de *Hyptidendron canum* (Pohl ex Benth.) Harley, Lamiaceae. *Revista Brasileira de Farmacognosia Brazilian Journal of Pharmacognosy* 20(2): 192-200.
- Fraternale, D.; Dufat, H.; Albertini, M.C.; Bouzidi, C.; D’Adderio, R.; Coppari, S.; Di Giacomo, B.; Melandri, D.; Ramakrishna, S.; Colomba, M. (2022). Chemical composition, antioxidant and anti-inflammatory properties of *Monarda didyma* L. essential oil. *PeerJ*, 10, e14433. doi: 10.7717/peerj.14433.
- Fushiya, S.; Batkhuu, J.; Takano, F.; Hayasaka, H.; Ohba, K.; Yoshizaki, F.; Dashi, T.; Batsuren, D.; Sanchir, C. (2000). Effects of Mongolian plants on nitric oxide production in activated macrophages. *Natural Medicines*, 54(6), 352–357.
- Galasso, S.; Pacifico, S.; Kretschmer, N.; Pan, S.; Marciano, S.; Piccolella, S.; Monaco, P.; Bauer, R. (2014). Influence of seasonal variation on *Thymus longicaulis* C. Presl chemical composition and its antioxidant and anti-inflammatory properties. *Phytochemistry*, 107: 80–90. http://dx.doi.org/10.1016/j.phytochem.2014.08.015
- García-Díaz, J.A.; Navarrete-Vázquez, G.; García-Jiménez, S.; Hidalgo-Figueroa, S.; Almanza-Pérez, J.C.; Alarcón-Aguilar, F.J.; Gómez-Zamudio, J.; Cruz, M.; Ibarra-Barajas, M.; Estrada-Soto, S. (2016). Antidiabetic, antihyperlipidemic and anti-inflammatory effects of tilianin in streptozotocin-nicotinamide diabetic rats. *Biomedicine Pharmacotherapy*, 83, 667–675. doi.org/10.1016/j.biopha.2016.07.023
- Garzoli, S.; Alarcón-Zapata, P.; Seitimova, G.; ...Pezzani, R.; Vitalini, S. (2022). Natural essential oils as a new therapeutic tool in colorectal cancer. *Cancer Cell International*, 22(1), 407.
- Georgiev, Y.N.; Paulsen, B. S.; Kiyohara, H.; Ciz, M.; Ognyanov, M.H.; Vasicek, O.; Rise, F.; Denev, P.N.; Yamada, H.; Lojek, A.; Kussovski, V.; Barsett, H.; Krastanov, A.I., Yanakieva, I. Z.; Kratchanova, M.G. (2017). The common lavender (*Lavandula angustifolia* Mill.) pectic polysaccharides modulate phagocytic leukocytes and intestinal Peyer’s patch cells. *Carbohydrate Polymers*, 174, 948–959. doi.org/10.1016/j.carbpol.2017.07.011

- Ghorani, V.; Beigoli, S.; Khazdair, M.R., Boskabady, M.H. 2022. The effect of *Zataria multiflora* on respiratory allergic and immunologic disorders, experimental and clinical evidence: A comprehensive review. In *Phytotherapy Research* 36(3), 1135–1155. doi.org/10.1002/ptr.7382
- Ghuman, S.; Ncube, B.; Finnie, J.F.; McGaw, L.J.; Njoya, E.M.; Coopoosamy, R.M.; Van-Staden, J., 2019. Antioxidant, anti-inflammatory and wound healing properties of medicinal plant extracts used to treat wounds and dermatological disorders. *South African Journal of Botany*. 126, 232–240. doi.org/10.1016/j.sajb.2019.07.013.
- Giovannini, D.; Gismondi, A.; Basso, A.; Canuti, L.; Braglia, R.; Canini, A.; Mariani, F.; Cappelli, G. (2016). *Lavandula angustifolia* mill. Essential oil exerts antibacterial and anti-inflammatory effects in macrophage mediated immune response to staphylococcus aureus. *Immunological Investigations*, 45(1), 11–28. doi.org/10.3109/08820139.2015.1085392
- González-Ramírez, A.; González-Trujano, M.E.; Pellicer, F.; López-Muñoz F. J. (2012). Anti-nociceptive and anti-inflammatory activities of the *Agastache mexicana* extracts by using several experimental models in rodents. *Journal of Ethnopharmacology*, 142(3), 700–705. doi.org/10.1016/j.jep.2012.05.044
- Grzegorzczak-Karolak, I.; Staniewska, P.; Lebelt, L.; Piotrowska, D. (2022). Optimization of cultivation conditions of *Salvia viridis* L. shoots in the Plantform bioreactor to increase polyphenol production. *Plant Cell, Tissue and Organ Culture (PCTOC)*, 149:269–280. <https://doi.org/10.1007/s11240-021-02168-2>
- Guginski, G.; Luiz, A.P.; Silva, M.D.; Massaro, M.; Martins, D.F.; Chaves, J.; Mattos, R.W.; Silveira, D.; Ferreira, V.M.M.; Calixto, J. B.; Santos, A.R.S. (2009). Mechanisms involved in the antinociception caused by ethanolic extract obtained from the leaves of *Melissa officinalis* (lemon balm) in mice. *Pharmacology Biochemistry and Behavior*, 93(1), 10–16. doi.org/10.1016/j.pbb.2009.03.014
- Güneş, S.; Savran, A.; Paksoy, M.Y.; Koşar, M.; Çakılcioglu, U. (2017). Ethnopharmacological survey of medicinal plants in Karaisalı and its surrounding (Adana-turkey). *Journal of Herbal Medicine*, 8, 68-75. doi:10.1016/j.hermed.2017.04.002
- Hajhashemi, V.; Ghannadi, A.; Karim Pezeshkian, S. (2002). Antinociceptive and anti-inflammatory effects of *Satureja hortensis* L. extracts and essential oil. *Journal of Ethnopharmacology*, 82, 83–87. [www.elsevier.com/locate/jethpharm](http://www.elsevier.com/locate/jethpharm)
- Hajhashemi, V.; Ghannadi, A.; Sharif, B. (2003). Anti-inflammatory and analgesic properties of the leaf extracts and essential oil of *Lavandula angustifolia* Mill. *Journal of Ethnopharmacology*, 89(1), 67–71. doi.org/10.1016/S0378-8741(03)00234-4
- Hajhashemi, V.; Zolfaghari, B.; Yousefi, A. (2012). Antinociceptive and anti-inflammatory activities of *Satureja hortensis* seed essential oil, hydroalcoholic and polyphenolic extracts in animal models. *Medical Principles and Practice*, 21(2), 178–182. doi.org/10.1159/000333555

- Hamamouchi, J.; El Mahi, M.; El Abbes Faouzi, M. (2021). Investigation of *Origanum compactum* essential oil for analgesic and anti-inflammatory activities. E3S Web of Conferences, 319. <https://doi.org/10.1051/e3sconf/202131901104>
- Harput, U.S.; Saracoglu, .I; Ogihara, Y. (2006). Effects of two *Prunella* species on lymphocyte proliferation and nitric oxide production. *Phytotherapy Research*, 20(2):157-159. [https://doi:10.1002/ptr.1805](https://doi.org/10.1002/ptr.1805). PMID: 16444671.
- Hassan, Z.Y.; Hassan, T.Y.; Abu-Raghif, A.R. (2022). Evaluation the Effectiveness of Phenolic Compound of *Salvia frigida* on Induced Atopic Dermatitis in Experimental Mice. *Iraqi Journal of Pharmaceutical Sciences*, 31(1), 154–166. [doi.org/10.31351/vol31iss1pp154-166](https://doi.org/10.31351/vol31iss1pp154-166)
- He, H.; Jiang, H.; Chen, Y.; Ye, J.; Wang, A.; Wang, C.; Liu, Q.; Liang, G.; Deng, X.; Jiang, W.; Zhou, R. (2018). Oridonin is a covalent NLRP3 inhibitor with strong anti-inflammasome activity. *Nature Communications*, 9(1). [doi.org/10.1038/s41467-018-04947-6](https://doi.org/10.1038/s41467-018-04947-6)
- Hernández-Herrera, A.D.; Luna-Herrera, J.; Del Rocío González-Martínez, M.; Prieto-Hinojosa, A.I.; Turcios-Esquivel, A.M.; Castillo-Maldonado, I.; Delgadillo-Guzmán, D.; Ramírez-Moreno, A.; Bustos-Brito, C.; Esquivel, B.; Vega-Menchaca, M.D.; Pedroza-Escobar, D. (2023). Immunomodulatory activity of diterpenes over innate immunity and cytokine production in a human alveolar epithelial cell line infected with *Mycobacterium tuberculosis*. *Current Molecular Pharmacology*, 16(6), 682-689. doi: 10.2174/1874467215666221005115007.
- Hernandez-Perez, M.; Rabanal, R.M.; De La Torre, M.C.; Rodriguez, B. (1995). Analgesic, anti-inflammatory, antipyretic and haematological effects of aethiopinone, an o-naphthoquinone diterpenoid from *Salvia aethiopsis* roots and two hemisynthetic derivatives. *Planta Medica*, 61(6), 505-509. doi:10.1055/s-2006-959358
- Hong, S.S.; Lee, C.; Lee, C.H.; Park, M.; Lee, M.S.; Hong, J.T.; Lee, H.; Lee, M.K.; Hwang, B.Y. (2009). A new furofuran lignan from *Isodon japonicus*. *Archives of Pharmacal Research*, 32(4), 501–504. <https://doi.org/10.1007/s12272-009-1404-x>
- Hosseinzadeh, H.; Yavary, M. (1999). Anti-inflammatory effect of *Salvia leriifolia* Benth. leaf extract in mice and rats. *Pharmaceutical and Pharmacological Letters*, 9(2), 60–61.
- Hosseinzadeh, H.; Haddadkhodaparast, M.H.; Arash, A.R. (2003). Antinociceptive, antiinflammatory and acute toxicity effects of *Salvia leriifolia* benth. Seed extract in mice and rats. *Phytotherapy Research*, 17(4), 422–425. [doi.org/10.1002/ptr.1154](https://doi.org/10.1002/ptr.1154)
- Hsu, C.L.; Hong, B.O.H.; Shan, Y.U.; Yen, G.C. (2010). Antioxidant and Anti-Inflammatory effects of *Orthosiphon aristatus* and its bioactive compounds. *Journal of Agricultural and Food Chemistry*, 58(4), 2150–2156. [doi.org/10.1021/jf903557c](https://doi.org/10.1021/jf903557c)



- Huang, B.P.; Lin, C.H.; Chen, Y.C.; Kao, S.H. (2014). Anti-inflammatory effects of *Perilla frutescens* leaf extract on lipopolysaccharide stimulated RAW264.7 cells. *Molecular Medicine Reports*, 10(2), 1077–1083. doi.org/10.3892/mmr.2014.2298
- Hussain, L.; Sajid Hamid Akash, M.; Imran Qadir, M.; Iqbal, R.; Irfan, M.; Imran Qadir, M. (2017). Analgesic, anti-inflammatory, and antipyretic activity of *Salvia moorcroftiana*. *Article in Pakistan Journal of Pharmaceutical Sciences*, 30(2). www.researchgate.net/publication/316007134.
- Hwang, B.; Lee, J.; Koo, T.; Kim, H.; Hong, Y.; Ro, J.; Lee, K.; Lee, J. (2001). Kaurane diterpenes from *Isodon japonicus* inhibit nitric oxide and prostaglandin E2 production and NF-KB activation in LPS-stimulated macrophage RAW264.7 cells. *Planta Medica*, 67, 406–410.
- Hwang, Y J.; Lee, E.J.; Kim, H.R.; Hwang, K.A. (2013). NF-κB-targeted anti-inflammatory activity of *Prunella vulgaris* var. *lilacina* in macrophages RAW 264.7. *International Journal of Molecular Sciences*, 14(11), 21489–21503. doi.org/10.3390/ijms141121489.
- Ibrahim, A.Y.; Shahat, A.; Mohamed, T.; Elshamy, A.; Alqahtani, A.; Saleh, I.; Hassan, E.; Hegazy, M. 2020. *In vitro* anti-inflammatory and acetylcholinesterase inhibition efficiency of plant extracts from Sinai-Egypt. *Indian Journal of Traditional Knowledge*, 19 (3): 635-641.
- Ibrahim, A.Y.; Youness, E.R.; Shalaby, A.S.; Magd El-Din, M. (2016). Anti-acetylcholinesterase, Anti-inflammatory and Anti-oxidant Activities of *Mentha longifolia* for Treating Alzheimer Disease. *Der Pharmacia Lettre*, 8(7), 34–39.
- Ikoma, K.; Takahama, M.; Kimishima, A.; Pan, Y.; Taura, M.; Nakayama, A.; Arai, M.; Takemura, N.; Saitoh, T. (2022). Oridonin suppresses particulate-induced NLRP3-independent IL-1α release to prevent crystallopathy in the lung. *International Immunology*, 34(10), 493–504. https://doi.org/10.1093/intimm/dxac018
- Ismaili, H.; Sosa, S.; Brkic, D.; Aquino, R.P.; Tubaro, A. (2002). Topical anti-inflammatory activity of extracts and compounds from *Thymus broussonettii*. *Journal of Pharmacy and Pharmacology*, 54(8), pp. 1137–1140.
- Jang, H.H.; Cho, S.Y.; Kim, M.J.; Kim, J.B.; Lee, S.H.; Lee, M.Y.; Lee, Y.M. (2016). Anti-inflammatory effects of *Salvia plebeia* R. Br extract in vitro and in ovalbumin-induced mouse model. *Biological Research*, 49(1). doi.org/10.1186/s40659-016-0102-7
- Jang, H.H.; Lee, S.; Lee, S.J.; Lim, H.J.; Jung, K.; Kim, Y.H.; Lee, S.W.; Rho, M.C. (2017). Anti-inflammatory Activity of Eudesmane-Type Sesquiterpenoids from *Salvia plebeia*. *Journal of Natural Products*, 80(10), 2666–2676. doi.org/10.1021/acs.jnatprod.7b00326

- Javdan, N.; Estakhr, J. (2011b). Evaluation of the effects of *Salvia hypoleuca* on the expression of cytokines: IL-6, IL-10 and TNF- $\alpha$  in high fat diet-fed mice towards a cure for *Diabetes mellitus*. *Pharmacologyonline*, 2, 842-852. Retrieved from [www.scopus.com](http://www.scopus.com)
- Jeong, H.; Sung, M.; Kim, Y.; Ham, H.; Choi, Y.; Lee, J. (2012). Anti-inflammatory activity of *Salvia plebeia* R. Br. leaf through heme oxygenase-1 induction in LPS-stimulated RAW264.7 macrophages. *Journal of the Korean Society of Food Science and Nutrition*, 41(7), 888–894. doi.org/10.3746/jkfn.2012.41.7.888
- Jia, T.; Cai, M.; Ma, X., Li, M.; Qiao, J.; Chen, T. (2019). Oridonin inhibits IL-1 $\beta$ -induced inflammation in human osteoarthritis chondrocytes by activating PPAR- $\gamma$ . *International Immunopharmacology*, 69, 382–388. doi.org/10.1016/j.intimp.2019.01.049
- Jiang, H.; Li, X.; Sun, H.; Zhang, H.; Puno, P. (2018). Scopariusols L-T, nine new ent-kaurane diterpenoids isolated from *Isodon scoparius*. *Chinese Journal of Natural Medicines*, 16(6), 456–464.
- Jiang, H.-Y.; Wang, W.-G.; Zhou, M.; Wu, H.-Y.; Zhan, R.; Du, X.; Pu, J.-X.; Sun, H.-D. (2014a). 6,7-seco-ent-Kaurane diterpenoids from *Isodon sculponeatus* and their bioactivity. *Chinese Chemical Letters*, 25, 541–544. <http://dx.doi.org/10.1016/j.cclet.2014.01.041>
- Jiang, H.-Y.; Wang, W.-G.; Zhou, M.; Wu, H.-Y.; Zhan, R.; Li, X.-N.; Du, X.; Li, Y.; Pu, J.-X.; Sun, H.-D. (2014b). Diterpenoids from *Isodon sculponeatus*, *Fitoterapia*, 93, 142–149. <http://dx.doi.org/10.1016/j.fitote.2013.12.025>.
- Kamatou, G.P.P.; Viljoen, A.M. (2010). A review of the application and pharmacological properties of  $\alpha$ -bisabolol and  $\alpha$ -bisabolol-rich oils. *JAOCS, Journal of the American Oil Chemists' Society*, 87(1), 1-7. doi:10.1007/s11746-009-1483-3
- Kamatou, G.P.P.; Makunga, N.P.; Ramogola, W.P.N.; Viljoen, A.M. (2008). South african *Salvia* species: A review of biological activities and phytochemistry. *Journal of Ethnopharmacology*, 119(3), 664-672. doi:10.1016/j.jep.2008.06.030
- Kamatou, G.P.P.; Van Zyl, R.L.; Van Vuuren, S.F.; Viljoen, A.M.; Figueiredo, A.C.; Barroso, J.G.; Tilney, P.M. (2006). Chemical composition, leaf trichome types and biological activities of the essential oils of four related *Salvia* species indigenous to southern Africa. *Journal of Essential Oil Research*, 18, 72-79. doi:10.1080/10412905.2006.12067125
- Kamatou, G.P.P.; Viljoen, A.M.; Steenkamp, P. (2010). Antioxidant, antiinflammatory activities and HPLC analysis of south african *Salvia* species. *Food Chemistry*, 119(2), 684-688. doi:10.1016/j.foodchem.2009.07.010.

- Kamatou, G.P.P.; Viljoen, A.M.; Gono-Bwalya, A. B.; Van Zyl, R.L.; Van Vuuren, S.F.; Lourens, A.C.U.; Steenkamp, P. (2005). The *in vitro* pharmacological activities and a chemical investigation of three south african *Salvia* species. *Journal of Ethnopharmacology*, 102(3), 382-390. doi:10.1016/j.jep.2005.06.034
- Kamatou, G.P.P.; Van Zyl, R.L.; Van Vuuren, S.F.; Viljoen, A.M.; Figueiredo, A.C.; Barroso, J.G.; Pedro, L.G. (2006). Biological activities and composition of *Salvia muirii* L. essential oil. *Journal of Essential Oil Research*, 18, 48-51. <https://doi.org/10.1080/10412905.2006.12067119>.
- Kamatou, G.P.P.; Viljoen, A.M.; Figueiredo, A.C.; Tilney, P.M.; Van Zyl, R.L.; Barroso, J.G.; Pedro, L.G.; Van Vuuren, S.F. (2007). Trichomes, essential oil composition and biological activities of *Salvia albicaulis* Benth. and *S. dolomitica* Codd., two species from the Cape region of South Africa. *South African Journal of Botany*, 73: 102-108. <https://doi.org/10.1016/j.sajb.2006.08.001>
- Kang, H. (2018). Anti-inflammatory mechanism of *Isodon Japonicas* (Burm.) Hara on lipopolysaccharide-induced neuroinflammation. *Tropical Journal of Pharmaceutical Research*, 17(1), 85–89. <https://doi.org/10.4314/tjpr.v17i1.13>
- Suttajit, M. (2021). Anti-inflammatory effect of *Perilla frutescens* seed oil rich in omega-3 fatty acid on dextran sodium sulfate-induced colitis in mice. *Research in Pharmaceutical Sciences*, 16(5), 464–473. doi.org/10.4103/1735-5362.323913
- Kapewangolo, P.; Hussein, A.A.; Meyer, D. (2013). Inhibition of HIV-1 enzymes, antioxidant and anti-inflammatory activities of *Plectranthus barbatus*. *Journal of Ethnopharmacology*, 149(1), 184–190. doi.org/10.1016/j.jep.2013.06.019
- Kapewangolo, P.; Omolo, J.J.; Bruwer, R.; Fonteh, P.; Meyer, D. (2015). Antioxidant and anti-inflammatory activity of *Ocimum labiatum* extract and isolated labdane diterpenoid. *Journal of Inflammation*, 12, 4. doi: 10.1186/s12950-015-0049-4.
- Karabay-Yavasoglu, N.U.; Baykan, S.; Ozturk, B.; Apaydin, S.; Tuglular, I. (2006). Evaluation of the antinociceptive and anti-inflammatory activities of *Satureja thymbra* L. essential oil. *Pharmaceutical Biology*, 44(8), pp. 585–591.
- Karaca, N.; Demirci, B.; Gavahian, M.; Demirci, F. (2023). Enhanced Bioactivity of Rosemary, Sage, Lavender, and Chamomile Essential Oils by Fractionation, Combination, and Emulsification. *ACS Omega*, 8(12), pp. 10941–10953.
- Karakaş, Ö.; Bekler, F.M. (2022). Essential oil compositions and antimicrobial activities of *Thymbra spicata* L. var. *spicata* L., *Lavandula X intermedia* Emeric ex Loisel., *Satureja macrantha* C. A. MEYER and *Rosmarinus officinalis* L. *Brazilian Archives of Biology and Technology*, 65, 1-11. doi:10.1590/1678-4324-2022210297.

- Karimian, P.; Kavooosi, G.; Amirghofran, Z. (2013). Anti-inflammatory effect of *Mentha longifolia* in lipopolysaccharide- stimulated macrophages: Reduction of nitric oxide production through inhibition of inducible nitric oxide synthase. *Journal of Immunotoxicology*, 10(4), 393–400. doi.org/10.3109/1547691X.2012.758679
- Kenari, H.M.; Yousefsani, B.S.; Eghbalian, F.; ...Jamshidi, A.H.; Mahroozade, S. (2021). Herbal recommendations for treatment of COVID-19 symptoms according to Persian medicine. *Journal of Medicinal Plants*, 20(77), pp. 1–14
- Khalighi-Sigaroodi, F.; Ahvazi, M.; Ebrahimzadeh, H.; Rahimifard, N. (2013). Chemical composition of the essential oil and antioxidant activities, total phenol and flavonoid content of the extract of *Nepeta pogonosperma*. *Journal of Medicinal Plants*, 12(48), 185–199.
- Khan, S.; Iqbal Yattoo, M. (n.d.). Potential herbs for bovine mastitis research-a mini review Anti-Neoplastic effects of Garcinol View project NFBSFARA project in 2010-11 session View project. <https://www.researchgate.net/publication/358925222>
- Khankandi, H.P.; Behzad, S.; Mojab, F.; Ahmadian-Attari, M.M.; Sahranavard, S. (2019). Effects of some Lamiaceae species on NO production and cell injury in hydrogen peroxide-induced stress. *Iranian Journal of Pharmaceutical Research*, 18(2), 826–835. doi.org/10.22037/ijpr.2019.1100685
- Khazdair, M.R.; Ghorani, V.; Alavinezhad, A.; Boskabady, M.H. (2018). Pharmacological effects of *Zataria multiflora* Boiss L. and its constituents focus on their anti-inflammatory, antioxidant, and immunomodulatory effects. *Fundamental and Clinical Pharmacology* (Vol. 32, Issue 1, pp. 26–50). Blackwell Publishing Ltd. doi.org/10.1111/fcp.12331
- Khouchlaa, A.; Et-Touys, A.; Lakhdar, F.; ...El Idrissi, A.E.Y.; Zaakour, F. (2022). Ethnomedicinal use, phytochemistry, pharmacology, and toxicology of *Salvia verbenaca* L.: A review. *Biointerface Research in Applied Chemistry*, 12(2), pp. 1437–1469.
- Kim, B.W.; Koppula, S.; Kim, I.S.; Lim, H.W.; Hong, S.M.; Han, S.D.; Hwang, B.Y. (2011). Anti-neuroinflammatory activity of kamebakaurin from *Isodon japonicus* via inhibition of c-Jun NH2-terminal kinase and p38 mitogen-activated protein kinase p Choathway in activated microglial cells. *Journal of Pharmacological Sciences*, 116(3), 296–308. <https://doi.org/10.1254/jphs.10324FP>
- Kim, B.; Han, Y.E.; Lee, H.J. (2017). Antioxidant and anti-inflammatory effects of the ethyl acetate fraction of the *Agastache rugosa* extract. *Korean Journal of Food Science and Technology*, 49(3), 331–337. doi.org/10.9721/KJFST.2017.49.3.331
- Kim, D.; Lee, S.K.; Park, K.-S.; Park, H.-J. 2020. Isolation of the constituents from *Clinopodium chinense* var. *shibetchense* and inhibition activity on cancer cell growth and nitric oxide production. *Korean Journal of Pharmacognosy*, 51(2), pp. 93–99.

- Kim, H.; Hong, J.Y.; Jeon, W.J.; Lee, J.; Baek, S.H.; Ha, I.H. (2021). *Lycopus lucidus* Turcz exerts neuroprotective effects against H<sub>2</sub>O<sub>2</sub>-induced neuroinflammation by inhibiting NLRP3 inflammasome activation in cortical neurons. *Journal of Inflammation Research*, 14, 1759–1773. <https://doi.org/10.2147/JIR.S305031>
- Kim, H.-H.; Yoo, J.-S.; Lee, H.-S.; ...Shin, T.-Y.; Kim, S.-H. (2011). *Elsholtzia ciliata* inhibits mast cell-mediated allergic inflammation: Role of calcium, p38 mitogen-activated protein kinase and nuclear factor- $\kappa$ B. *Experimental Biology and Medicine*, 236(9), pp. 1070–1077.
- Kim, J.Y.; Kim, H.S.; Kim, Y.J.; Lee, H.K.; Kim, J.S.; Kang, J.S.; Hong, J.T.; Kim, Y.; Hwang, B.Y.; Han, S.B. (2013). Effusanin C inhibits inflammatory responses via blocking NF- $\kappa$ B and MAPK signaling in monocytes. *International Immunopharmacology*, 15(1), 84–88. <https://doi.org/10.1016/j.intimp.2012.11.002>
- Kim, J.; Song, S.; Lee, I.; Kim, Y.; Yoo, I.; Ryoo, I.; Bae, K. (2011). Anti-inflammatory activity of constituents from *Glechoma hederacea* var. *longituba*. *Bioorganic and Medicinal Chemistry Letters*, 21(11), 3483–3487. [doi.org/10.1016/j.bmcl.2011.02.002](https://doi.org/10.1016/j.bmcl.2011.02.002)
- Kim, K.M.; Kim, S.Y.; Mony, T.J.; Bae, H.J.; Han, S.D.; Lee, E.S.; Choi, S.H.; Hong, S.H.; Lee, S.D.; Park, S.J. (2021). *Dracocephalum moldavica* ethanol extract suppresses LPS-induced inflammatory responses through inhibition of the jnk/erk/nf- $\kappa$ b signaling pathway and il-6 production in raw 264.7 macrophages and in endotoxic-treated mice. *Nutrients*, 13(12). [doi.org/10.3390/nu13124501](https://doi.org/10.3390/nu13124501)
- Kim, M.; Sowndhararajan, K.; Kim, S. 2022. The Chemical Composition and Biological Activities of Essential Oil from Korean Native Thyme Bak-Ri-Hyang (*Thymus quinquecostatus* Celak.). *Molecules* 2022,27,4251. [doi.org/10.3390/molecules27134251](https://doi.org/10.3390/molecules27134251).
- Kim, S.Y.; Han, S.D.; Kim, M.; Mony, T.J.; Lee, E.S.; Kim, K.M.; Choi, S.H.; Hong, S.H.; Choi, J.W.; Park, S.J. (2021b). *Mentha Arvensis* essential oil exerts anti-inflammatory in LPS-stimulated inflammatory responses via inhibition of ERK/nf- $\kappa$ b signaling pathway and anti-atopic dermatitis-like effects in 2,4-dinitrochlorobezene-induced BALB/C mice. *Antioxidants*, 10(12). [doi.org/10.3390/antiox10121941](https://doi.org/10.3390/antiox10121941)
- Kim, T.-W.; Kim, Y.-J.; Seo, C.-S.; ...Lee, M.-Y.; Jung, J.-Y. (2016). *Elsholtzia ciliata* (Thunb.) Hylander attenuates renal inflammation and interstitial fibrosis via regulation of TGF- $\beta$  and Smad3 expression on unilateral ureteral obstruction rat model. *Phytomedicine*, 23(4), pp. 331–339.
- Kim, W.; Son, K.; Chang, H.; Bae, K.; Kang, S.; Kim, H. (2003). Anti-Inflammatory activity of *Elsholtzia splendens*. *Archives of Pharmacal Research*, 26(3), 232–236.
- Ko, H.M.; Koppula, S.; Kim, B.-W.; Kim, I.S.; Hwang, B.Y.; Suk, K.; Park, E.J.; Choi, D.-K. (2010). *European Journal of Pharmacology*, 633, 98–106. [doi:10.1016/j.ejphar.2010.02.011](https://doi.org/10.1016/j.ejphar.2010.02.011).

- Kogiannou, D.A.A.; Kalogeropoulos, N.; Kefalas, P.; Polissiou, M.G.; Kaliora, A.C. (2013). Herbal infusions; their phenolic profile, antioxidant and anti-inflammatory effects in HT29 and PC3 cells. *Food and Chemical Toxicology*, 61, 152–159. <http://dx.doi.org/10.1016/j.fct.2013.05.027>.
- Kosar, M.; Goger, F.; Can Baser, K.H. *In vitro* antioxidant properties and phenolic composition of *Salvia virgata* Jacq. from Turkey. *J. Agric. Food Chem.*, 2008, 6, 2369-2374.
- Kostić, M.; Kitić, D.; Petrović, M.B.; Jevtović-Stoimenov, T.; Jović, M.; Petrović, A.; ižvanović, S. (2017). Anti-inflammatory effect of the *Salvia sclarea* L. ethanolic extract on lipopolysaccharide-induced periodontitis in rats. *Journal of Ethnopharmacology*, 199, 52–59. [doi.org/10.1016/j.jep.2017.01.020](https://doi.org/10.1016/j.jep.2017.01.020)
- Kulabas, S.S.; Ipek, H.; Tufekci, A.R.; Arslan, S.; Demirtas, I.; Ekren, R.; Sezerman, U.; T. B. Tumer. (2018). Ameliorative potential of *Lavandula stoechas* in metabolic syndrome via multitarget interactions. *Journal of Ethnopharmacology*, 223, 88–98. [doi.org/10.1016/j.jep.2018.04.043](https://doi.org/10.1016/j.jep.2018.04.043)
- Kumar, A.; Singh, S.; Kumar, A.; Umrao Bawankule, D.; Tandon, S.; Kumar, A.; Swaroop Verma, R.; Saikia, D. (2021). Chemical composition, bactericidal kinetics, mechanism of action, and anti-inflammatory activity of *Isodon melissoides* (Benth.) H. Hara essential oil, *Natural Product Research*, 35:4, 690-695. <https://doi.org/10.1080/14786419.2019.1591399>.
- González Pereyra, M.; Cariddi, L. N.; Ybarra, F.; Isola, M. C.; Demo, M. S.; Sabini, L.; Maldonado, A. M. (n.d.). Immunomodulating properties of *Minthostachys verticillata* on human lymphocytes and basophils. [www.revistasmedicasmexicanas.com.mx](http://www.revistasmedicasmexicanas.com.mx)
- Lee, J.W.; Lee, M.S.; Kim, T.H.; Lee, H.J.; Hong, S.S.; Noh, Y.H.; Hwang, B.Y.; Ro, J.S.; Hong, J.T. (2007). Inhibitory effect of Inflexinol on Nitric Oxide Generation and iNOS expression via inhibition of NF-κB activation. *Mediators of Inflammation*, 2007, 93148. doi: 10.1155/2007/93148.
- Lee, Y.J.; Kang, D.G.; Kim, J.S.; Lee, H.S. (2008). *Lycopus lucidus* inhibits high glucose-induced vascular inflammation in human umbilical vein endothelial cells. *Vascular Pharmacology*, 48(1), 38–46. <https://doi.org/10.1016/j.vph.2007.11.004>
- Lee, Y.; Lim, H.W.; Ryu, I.W.; Huang, Y.H.; Park, M.; Chi, Y.M.; Lim, C.J. (2020). Anti-Inflammatory, Barrier-Protective, and Antiwrinkle Properties of *Agastache rugosa* Kuntze in Human Epidermal Keratinocytes. *BioMed Research International*, 2020. [doi.org/10.1155/2020/1759067](https://doi.org/10.1155/2020/1759067)
- Lehbili, M.; Alabdul Magid, A.; Kabouche, A.; Voutquenne-Nazabadioko, L.; Abedini, A.; Morjani, H.; Gangloff, S.C.; Kabouche, Z. (2018). Antibacterial, antioxidant and cytotoxic activities of triterpenes and flavonoids from the aerial parts of *Salvia barrelieri* Etl. *Natural Product Research*, 32(22), 2683–2691. [doi.org/10.1080/14786419.2017.1378207](https://doi.org/10.1080/14786419.2017.1378207)
- Leung, C.H.; Grill, S.P.; Lam, W.; Gao, W.; Sun, H.D.; Cheng, Y.C. (2006). Eriocalyxin B inhibits nuclear factor-κB activation by interfering with the binding of both p65 and p50 to the response element in a noncompetitive manner. *Molecular Pharmacology*, 70(6), 1946–1955. [doi.org/10.1124/mol.106.028480](https://doi.org/10.1124/mol.106.028480)

- Li C.; Luo Y.; Zhang W.; Cai Q.; Wu X.; Tan Z.; Chen R.; Chen Z.; Wang S.; Zhang L. 2021. A comparative study on chemical compositions and biological activities of four essential oils: *Cymbopogon citratus* (DC.) Stapf, *Cinnamomum cassia* (L.) Presl, *Salvia japonica* Thunb. and *Rosa rugosa* Thunb. *Journal of Ethnopharmacology*, 280:114472. [https://doi: 10.1016/j.jep.2021.114472](https://doi.org/10.1016/j.jep.2021.114472)
- Li L.; Zhou M.; Xue G.; Wang W.; Zhou X.; Wang X.; Kong L.; Luo J. 2018. Bioactive seco-abietane rearranged diterpenoids from the aerial parts of *Salvia prionitis*. *Bioorganic Chemistry*, 81:454-460. [https://doi: 10.1016/j.bioorg.2018.08.040](https://doi.org/10.1016/j.bioorg.2018.08.040)
- Li, J.; Du, J., Sun, L.; Liu, J.; Quan, Z. (2010). Anti-Inflammatory Function of Nodosin via Inhibition of IL-2. *The American Journal of Chinese Medicine* (Vol. 38, Issue 1). [www.worldscientific.com](http://www.worldscientific.com)
- Li, L.; Huang, Q.; Duan, X.; Han, L.; Peng, D. (2020). Protective effect of *Clinopodium chinense* (Benth.) O. Kuntze against abnormal uterine bleeding in female rats. *Journal of Pharmacological Sciences*, 143(1), pp. 1–8
- Li, L.-L.; Huang, Q.; Peng, D.-Y.; Qi, J.-J.; Yao, M. (2022). Anti-inflammatory and hemostatic effects of total extract, saponins, and flavonoids of *Clinopodium chinense* in female rats with abnormal uterine bleeding and mechanism. *Zhongguo Zhongyao Zazhi*, 47(12), pp. 3372–337
- Li, S.M.; Yang, X.W.; Li, Y.L.; Shen, Y.H.; Feng, L.; Wang, Y.H.; Zeng, H.W.; Liu, X.H.; Zhang, C.S.; Long, C.L.; Zhang, W.D. (2009). Chemical constituents of *Dracocephalum forrestii*. *Planta Medica*, 75(15), 1591–1596. [doi.org/10.1055/s-0029-1185868](https://doi.org/10.1055/s-0029-1185868)
- Li, S. Y.; Zhu, L.H.; Rao, Z.Y.; Wang, C.J.; Jiang, M.; Zhang, J.; Yin, Z.Q. (2021). Two new 7, 20-epoxy-ent-kauranes from the aerial parts of *Isodon eriocalyx*. *Natural Product Research*, 35(21), 3859–3864. [doi.org/10.1080/14786419.2020.1744141](https://doi.org/10.1080/14786419.2020.1744141)
- Li, Y.X.; Liu, Y.B.; Ma, A.Q.; Bao, Y.; Wang, M.; Sun, Z.L. (2017). In vitro antiviral, anti-inflammatory, and antioxidant activities of the ethanol extract of *Mentha piperita* L. *Food Science and Biotechnology*, 26(6), 1675–1683. [doi.org/10.1007/s10068-017-0217-9](https://doi.org/10.1007/s10068-017-0217-9)
- Li, Y.-M.; Zou, H.-Y.; Hu, H.-Y.; Di, L.; Li, H.-L.; Hu, Z.; Lin, L.; Liao, D.; Xia, B.; Lin, Y. (2020). Effect of water extract of *Prunella vulgaris* on NLRP3/Caspase-1/IL-1B pathway in rats with allergic conjunctivitis. *Chinese Journal of New Drugs*, 29(8), 929–933. [doi.org/10.1097/ACI.0000000000000100](https://doi.org/10.1097/ACI.0000000000000100)
- Lim, H.W.; Lee, Y.; Huang, Y.H.; Yoon, J.Y.; Lee, S.H.; Kim, K.; Lim, C.J. (2017). Enhancement of skin antioxidant and anti-inflammatory potentials of *Agastache rugosa* leaf extract by probiotic bacterial fermentation in human epidermal keratinocytes. *Microbiology and Biotechnology Letters*, 45(1), 35–42. [doi.org/10.4014/mbl.1701.01002](https://doi.org/10.4014/mbl.1701.01002).

- Lim, J.Y.; Won, T.J.; Hwang, B.Y.; Kim, H.R.; Hwang, K.W.; Sul, D.; Park, S.Y. (2010). The new diterpene isodojaponin D inhibited LPS-induced microglial activation through NF-kappaB and MAPK signaling pathways. *European Journal of Pharmacology*, 642(1–3), 10–18. <https://doi.org/10.1016/j.ejphar.2010.05.047>
- Ling-Fei, K.; Xiao-Juan, R.; Pan, Y.; ...Tian-Le, G.; Cai, T. (2023). The influence of *Hyssopus cuspidatus* Boriss extract on lipid mediators metabolism network in asthmatic mice. *Frontiers in Pharmacology*, 14, 1066643.
- Lino, C.S.; Gomes, P.B.; Lucetti, D.L.; ...Silva, M.G.V.; Viana, G.S.B. (2005). Evaluation of antinociceptive and antiinflammatory activities of the essential oil (EO) of *Ocimum micranthum* Willd. from northeastern Brazil. *Phytotherapy Research*, 19(8), pp. 708–712.
- Liu, D.; Wang, Y.; Lu, Z.; Lv, F.; Bie, X.; Zhao, H. (2022b). Separation, characterization, and anti-inflammatory activities of galactoglycerolipids from *Perilla frutescens* (L.) Britton. *Natural Product Research*. [doi.org/10.1080/14786419.2022.2095637](https://doi.org/10.1080/14786419.2022.2095637).
- Liu, X.; Su, J.; Wang, G.; ...Wang, S.; Huang, Y. (2021). Discovery of phenolic glycoside from *Hyssopus cuspidatus* attenuates LPS-induced inflammatory responses by inhibition of iNOS and COX-2 expression through suppression of NF-κB activation. *International Journal of Molecular Sciences*, 22(22), 12128.
- Liu, X.; Wang, G.; Lv, C.; ...Wang, S.; Huang, Y. (202). 1Two new phenolic acids and one new phenolic glycoside from *Hyssopus cuspidatus* Boriss and their anti-inflammatory activities. *Phytochemistry Letters*, 46, pp. 15–20.
- Liu, Y.; Song, H.; Xu, J.; Bi, G.; Meng, D. (2022). Anti-inflammatory abietanes diterpenes and triterpenoids isolated from *Clinopodium polycephalum*. *Fitoterapia*, 161. [doi.org/10.1016/j.fitote.2022.105244](https://doi.org/10.1016/j.fitote.2022.105244)
- Llorent-Martínez, E.J.; Ruiz-Medina, A.; Zengin, G.; Ak, G.; Jugreet, S.; Mahomoodally, M.F.; Chiavaroli, A. (2022). New biological and chemical evidences of two Lamiaceae species (*Thymbra capitata* and *Thymus sipyleus* subsp. *rosulans*): In vitro, in silico and ex vivo approaches. *Molecules*, 27(24) [doi:10.3390/molecules27249029](https://doi.org/10.3390/molecules27249029)
- Loizzo, M.; Menichini, F.; Tundis, R.; Bonesi, M.; Conforti, F.; Nadjafi, F.; Statti, G.; Frega, N.; Menichini, F. (2009). *In vitro* biological activity of *Salvia lerrifolia* Benth. essential oil relevant to the treatment of Alzheimer’s disease. *Journal of Oleo Science*, 58(8), 443–446.
- Lopes, C.L.; Pereira, E.; Soković, M.; ...Barros, L.; Ferreira, I.C.F.R. (2018). Phenolic Composition and Bioactivity of *Lavandula pedunculata* (Mill.) Cav. Samples from Different Geographical Origin. *Molecules*, 23(5), 1037.



- López-García, R.E.; Rabanal, R.M.; Darias, V.; Martín-Herrera, D.; Carreiras, M.C.; Rodríguez, B. (1991), A preliminary study of *Cedronella canariensis* (L.) var. *canariensis* extracts for antiinflammatory and analgesic activity in rats and mice. *Phytotherapy Research*, 5: 273-275. doi.org/10.1002/ptr.2650050610,
- Lou, D.; Yan, D.; Guo, M.; Wang, Q.; Jiang, C.; Yin, Z. (2019). Antipyretic effect of *Isodon eriocalyx* extract on yeast-induced fever in rats. *Journal of China Pharmaceutical University* 6, 87-92.
- Lu, Y.; Chen, B.; Song, J.H.; Zhen, T.; Wang, B.Y.; Li, X.; Liu, P.; Yang, X.; Zhang, Q.L.; Xi, X.D.; Chen, S.; di, Zuo, J.P.; Chen, Z.; Chen, S.J. (2013). Eriocalyxin B ameliorates experimental autoimmune encephalomyelitis by suppressing Th1 and Th17 cells. *Proceedings of the National Academy of Sciences of the United States of America*, 110(6), 2258–2263. doi.org/10.1073/pnas.1222426110
- Lucca, L.G.; Romão, P.R.T.; Vignoli-Silva, M.; da VeigaJunior, V.F.; Koester, L.S. (2022). *In vivo* Acute Anti-Inflammatory Activity of Essential Oils: A Review. *Mini-Reviews in Medicinal Chemistry*, 22(11), pp. 1495–1515.
- Luís, Â.; Domingues, F. (2021). Screening of the potential bioactivities of pennyroyal (*Mentha pulegium* L.) essential oil. *Antibiotics*, 10(10). doi.org/10.3390/antibiotics10101266
- Ma, X.; Ma, X.; Ma, Z.; Wang, J.; Sun, Z.; Yu, W.; Li, F.; Ding, J. (2014). Effect of *Hyssopus officinalis* L. on inhibiting airway inflammation and immune regulation in a chronic asthmatic mouse model. *Experimental and Therapeutic Medicine*, 8(5), 1371–1374. doi.org/10.3892/etm.2014.1978
- Magalhães, A.; Santos, G.B.; Verdam, M.C.; Fraporti, L.; Malheiro, A.; Lima, E.S.; Dos-Santos, M.C. (2011). Inhibition of the inflammatory and coagulant action of *Bothrops atrox* venom by the plant species *Marsypianthes chamaedrys*. *Journal of Ethnopharmacology*, 134(1), 82–88. doi.org/10.1016/j.jep.2010.11.062.
- Mahalakshmi, B.; Huang, C.Y.; Lee, S.; da Maurya, N.; Kiefer, R.; Bharath Kumar, V. (2021). Review of Danshen: From its metabolism to possible mechanisms of its biological activities. In *Journal of Functional Foods*, 85. Elsevier Ltd. doi.org/10.1016/j.jff.2021.104613
- Mahmoud, A.M.; Wilkinson, F.L.; Sandhu, M.A.; Dos Santos, J.M.; Alexander, M.Y. 2019. Modulating oxidative stress in drug-induced injury and metabolic disorders: the role of natural and synthetic antioxidants. *Oxidative Medicine and Cellular Longevity*, 2019:3206401. https://doi: 10.1155/2019/3206401.
- Mahmoudi, M.; Morteza-Semnani, K.; Mojra, E. (2008). Anti-inflammatory and antinociceptive activity of *Thymus pubescens* extract. *Fitoterapia*, 79(5), 361–365. doi.org/10.1016/j.fitote.2008.04.004
- Mahomoodally, M.F.; Devi Dursun, P.; Venugopala, K.N. (2021). *Collinsonia canadensis* L. In *Naturally Occurring Chemicals against Alzheimer's Disease*, 373–377. Elsevier. doi.org/10.1016/B978-0-12-819212-2.00031-1

- Maklad, Y.A.; Aboutabl, E.A.; El-Sherei, M.M.; Meselhy, K.M. (1999). Bioactivity studies of *Salvia transsylvanica* (Schur. ex Griseb.) grown in Egypt. *Phytotherapy Research*, 13(2), 147–150. doi.org/10.1002/(SICI)1099-1573(199903)13:2<147:AID-PTR397>3.0.CO;2-E
- Martins-Gomes, C.; Taghouti, M.; Schäfer, J.; Silva, A.M.; Nunes, F.M. 2018. Chemical characterization and bioactive properties of decoctions and hydroethanolic extracts of *Thymus carnosus* Boiss. *Journal of Functional Foods*, 43, pp. 154–164.
- Mehmet, S.I.; Gürbüz, I.; Bedir, E.; Günbatan, T.; Demirci, F., 2021. Isolation of rosmarinic acid and methyl rosmarinate as lipoxygenase inhibitors from *Salvia palaestina* Benth. by activity-guided fractionation. *South African Journal of Botany*, 141: 177-182. https://doi.org/10.1016/j.sajb.2021.04.030
- Memariani, Z.; Rahimi, A.; Farzaei, M.H.; Zakaria Nejad, N. (2019). *Nepeta menthoides* Boiss. Buhse, an endemic species in Iran: A review of traditional uses, phytochemistry and pharmacology. *Journal of Herbmed Pharmacology*, 8(3), 194-204. doi: 10.15171/jhp.2019.29.
- Mendi, A.; Yagci, B. G.; Kiziloglu, M.; Saraç, N.; Ugur, A.; Yilmaz, D.; Uçkan, D. (2017). *Thymbra spicata* var. *intricata* induces mesenchymal stem cell proliferation and osteogenic differentiation. *Brazilian Archives of Biology and Technology*, 60 doi:10.1590/1678-4324-2017160391
- Messaoudi, M.; Rebiai, A.; Sawicka, B.; Atanassova, M.; Ouakouak, H.; Larkem, I.; Egbuna, C.; Awuchi, C.G.; Boubekour, S.; Ferhat, M.A.; Begaa, S.; Benchikha, N. (2022). Effect of extraction methods on polyphenols, flavonoids, mineral elements, and biological activities of essential oil and extracts of *Mentha pulegium* L. *Molecules*, 27(1). doi.org/10.3390/molecules27010011
- Mićović, T.; Katanić Stanković, J. S.; Bauer, R.; Nöst, X.; Marković, Z.; Milenković, D.; Jakovljević, V.; Tomović, M.; Bradić, J.; Stešević, D.; Stojanović, D.; Maksimović, Z. (2022). In vitro, in vivo and in silico evaluation of the anti-inflammatory potential of *Hyssopus officinalis* L. subsp. *aristatus* (Godr.) Nyman (Lamiaceae). *Journal of Ethnopharmacology*, 293. doi.org/10.1016/j.jep.2022.115201
- Miguel, M.G.; da Silva, C.I.; Farah, L.; Braga, F.C.; Figueiredo, A.C. (2021). Effect of essential oils on the release of TNF- $\alpha$  and CCL2 by LPS-stimulated THP-1 cells. *Plants*, 10(1), 1–14. doi.org/10.3390/plants10010050
- Milijasevic, B.; Steinbach, M.; Mikov, M.; Raskovic, A.; Capo, I.; Zivkovic, J.; Borisev, I.; Canji, J.; Teofilovic, B.; Vujcic, M.; Popovic, M. (2022). Impact of winter savory extract (*Satureja montana* L.) on biochemical parameters in serum and oxidative status of liver with application of the principal component analysis in extraction solvent selection. *European Review for Medical and Pharmacological Sciences*, 26, 4721–4734.

- Min, G.Y.; Kim, E.Y.; Hong, S.; Kim, J.H.; Kim, M.; Kim, E.J.; Park, J.H.; Sohn, Y.; Jung, H.S. (2021). *Lycopus lucidus* Turcz. ameliorates DNCB-induced atopic dermatitis in BALB/c mice. *Molecular Medicine Reports*, 24(6). <https://doi.org/10.3892/mmr.2021.12467>.
- Minaian, M.; Sadraei, H.; Asghari, G.; Khanabadi, M.; Minaian, M. (2017). Anti-inflammatory effect of apigenin and hydroalcoholic extract of *Dracocephalum kotschy* on acetic acid-induced colitis in rats. *Research in Pharmaceutical Sciences* (Vol. 12, Issue 4).
- Minaian, M.; Sadraei, H.; Yousefi, I.; Sajjadi, S.E.; Talebi, A. (2021). Evaluation of the effect of hydroalcoholic and flavonoid-enriched extracts of *Dracocephalum kotschy* on indomethacin-induced gastric ulcer in rats. *Research in Pharmaceutical Sciences*, 16(2), 141–152. <https://doi.org/10.4103/1735-5362.310521>
- Miraj, S.; Kiani, S. (2016). A review study of therapeutic effects of *Salvia officinalis* L. *Der Pharmacia Lettre*, 8(6), 299–303. [www.researchgate.net/publication/305147951](http://www.researchgate.net/publication/305147951)
- Miranda, R.S.; de Jesus, B.D.S.M.; da Silva Luiz, S.R.; Viana, C.B.; Adão Malafaia, C.R.; Figueiredo, F.S.; Carvalho, T.D.S.C.; Silva, M.L.; Londero, V.S.; da Costa-Silva, T.A.; Lago J.H.G., Martins, R.C.C. 2022. Antiinflammatory activity of natural triterpenes-An overview from 2006 to 2021. *Phytother Research*, 36(4):1459-1506. <https://doi: 10.1002/ptr.7359>.
- Modarres, M.; Asili, J.; Lahouti, M.; Gangali, A.; Iranshahy, M.; Sahebkar, A. (2014). Simultaneous determination of rosmarinic acid, salvianolic acid B and caffeic acid in *Salvia leriifolia* Benth. root, leaf and callus extracts using a high-performance liquid chromatography with diode-array detection technique. *Journal of Liquid Chromatography and Related Technologies*, 37(12), 1721–1730. [doi.org/10.1080/10826076.2013.807466](https://doi.org/10.1080/10826076.2013.807466)
- Mogosan, C.; Vostinaru, O.; Oprean, R.; Heghes, C.; Filip, L.; Balica, G.; Moldovan, R.I.; Schmidt, T.J. (2017). A comparative analysis of the chemical composition, anti-inflammatory, and antinociceptive effects of the essential oils from three species of *Mentha* cultivated in Romania. *Molecules*, 22(2). <https://doi.org/10.3390/molecules22020263>
- Mohanty, S.; Kamolvit, W.; Zambrana, S.; Sandström, C.; Gonzales, E.; Östenson, C. G.; Brauner, A. (2017). Extract of *Clinopodium bolivianum* protects against *E. coli* invasion of uroepithelial cells. *Journal of Ethnopharmacology*, 198, 214–220. [doi.org/10.1016/j.jep.2017.01.011](https://doi.org/10.1016/j.jep.2017.01.011)
- Mohsenzadeh, A.; Ahmadipour, S.; Ahmadipour, S.; Asadi-Samani, M. (2016). A review of the most important medicinal plants effective on cough in children and adults. *Der Pharmacia Lettre*, 8(1), 90-96.
- Momtaz, S.; Abdollahi, M. 2010. An Update on Pharmacology of *Satureja* Species; From Antioxidant, Antimicrobial, Antidiabetes and Anti-hyperlipidemic to Reproductive Stimulation. *International Journal of Pharmacology*, 6 (4): 346-353.

- Montironi, I.D.; Reinoso, E. B.; Paullier, V.C.; Siri, M.I.; Pianzzola, M.J.; Moliva, M.; Campra, N.; Bagnis, G.; Ferreira LaRocque-de-Freitas, I.; Decote-Ricardo, D.; Freire-de-Lima, C. G.; Raviolo, J.M.; Cariddi, L.N. (2019). *Minthostachys verticillata* essential oil activates macrophage phagocytosis and modulates the innate immune response in a murine model of *Enterococcus faecium* mastitis. *Research in Veterinary Science*, 125, 333–344. <https://doi.org/10.1016/j.rvsc.2019.07.015>
- Moraes, L.A.S.; Facanali, R.; Ortiz, M.; Marques, M.; Ming, L.C.; Angela, M., Meireles, A. (2002). Phytochemical characterization of essential oil from *Ocimum selloi*. 74(1), 183–186. [www.scielo.br/aabc](http://www.scielo.br/aabc)
- Moreno, L.; Bello, R.; Primo, E.; Esplugues, J. (2002). Pharmacological properties of the methanol extract from *Mentha suaveolens* Ehrh. *Phytotherapy Research*, 16(S1), 10–13. <https://doi.org/10.1002/ptr.744>
- Moretti, M.D.L.; Peana, A.T.; Satta, M. (1997). A study on anti-inflammatory and peripheral analgesic action of *Salvia sclarea* oil and its main components. *Journal of Essential Oil Research*, 9(2), 199–204. [doi.org/10.1080/10412905.1997.9699459](https://doi.org/10.1080/10412905.1997.9699459)
- Moshrefi-Araghi, A.; Nemati, H.; Azizi, M.; Moshtaghi, N.; Shoor, M. (2021). Association of Genetic Structure and Diversity in Iranian Wild Germplasms of *Mentha longifolia* L. Based on Phenotypical, Biochemical, and Molecular Markers. *Chemistry and Biodiversity*, 18(4). [doi.org/10.1002/cbdv.202001044](https://doi.org/10.1002/cbdv.202001044)
- Mousavi Nia, A.; Pari Kalantaripour, T.; Basiri, M.; Vafae, F.; Asadi-Shekaari, M.; Eslami, A.; Darvish Zadeh, F. (2017). *Nepeta Dschuparensis* Bornm Extract Moderates COX-2 and IL-1 $\beta$  Proteins in a Rat Model of Cerebral Ischemia. *Iran Journal of Medicine Sciences*, 42(2), 179–186.
- Mousavi, Z.; Hosaini, A.S.; Asgarpanah, J.; Najafizadeh, P. (2016). Antinociceptive effect of the endemic species *Nepeta depauperata* Benth. *Jundishapur Journal of Natural Pharmaceutical Products*, 11(2). [doi.org/10.17795/jjnpp-25623](https://doi.org/10.17795/jjnpp-25623)
- Moussaid, M.; Elamrani, A.E.; Bourhim, N.; Benaissa, M. (2011). *In Vivo* Anti-Inflammatory and *In Vitro* Antioxidant Activities of Moroccan Medicinal Plants. In *NPC Natural Product Communications* (Vol. 6, Issue 10).
- Murad, H.A.S.; Abdallah, H.M.; Ali, S.S. (2016). *Mentha longifolia* protects against acetic-acid induced colitis in rats. *Journal of Ethnopharmacology*, 190, 354–361. [doi.org/10.1016/j.jep.2016.06.016](https://doi.org/10.1016/j.jep.2016.06.016)
- Murata, T.; Oyama, K.; Fujiyama, M.; Oobayashi, B.; Umehara, K.; Miyase, T.; Yoshizaki, F. (2013). Diastereomers of lithospermic acid and lithospermic acid B from *Monarda fistulosa* and *Lithospermum erythrorhizon*. *Fitoterapia*, 91, 51–59. <https://doi.org/10.1016/j.fitote.2013.08.009>

- Mustarichie, R.; Moektiwardojo, M.; Apriani Dewi W. (2017). Isolation, Identification, and Characteristic of Essential Oil of Iler (*Plectranthus scutellarioides* (L.) R.Br leaves. *Journal of Pharmaceutical Sciences and Research*, 9(11), 2218-2223.
- Mustarichie, R.; Ramdhani, D.; Mekar Saptarini, N. (2022). The anti-inflammatory tablet formulation of *Coleus* (*Plectranthus scutellarioides*) leaves extract using Kollicoat® protect coating. *International Journal of Applied Pharmaceutics*, 14(4), 159-162.
- Müzell, D.; Lunardelli, A.; Leite, C.E.; Medeiros Fagundes, R.; Saciura, V.C.; Reichel, C.L.; Rodrigues De Oliveira, J.; Vieira Astarita, L. (2013). Nephroprotective and Anti-inflammatory Effects of Aqueous Extract of *Melissa officinalis* L. on Acetaminophen-induced and Pleurisy-induced Lesions in Rats. *Brazilian Archives of Biology and Technology*, 56(3), 383–392.
- Na, Z.; Li, S.-H.; Xiang, W.; Zhao, A.-H.; Li, C.-M.; Sun, H. (2010), A novel asymmetric ent-Kauranoid dimer from *Isodon enanderianus*. *Chinese Journal of. Chemistry*, 20: 884-886. doi.org/10.1002/cjoc.20020200915
- Naceiri Mrabti, H.; Doudach, L.; El Menyiy, N.; ...El Omari, N.; Bouyahya, A. (2018). Phytochemistry and Pharmacology of *Thymus broussonetii* Boiss. *Evidence-based Complementary and Alternative Medicine*, 2021,6350035.
- Nahak, G.; Sahu, R. (2014). Immunomodulatory activity of aqueous leaf extract of *Ocimum kilimandscharicum* Guerke in *Clarias batrachus*. *Int. J. Pharm. Sci. Rev. Res.*, 28(2), 137–146.
- Napagoda, M.; Gerstmeier, J.; Butschek, H.; Lorenz, S.; De Soyza, S.; Qader, M.; Nagahawatte, A.; Wijayaratne, G.B.; Schneider, B.; Svatoš, A.; Jayasinghe, L., Koeberle, A.; Werz, O. 2022. *Plectranthus zeylanicus*: A rich source of secondary metabolites with antimicrobial, disinfectant and anti-inflammatory activities. *Pharmaceuticals* (Basel) 15(4):436. https://doi: 10.3390/ph15040436.
- Napagoda, M.; Gerstmeier, J.; Wesely, S.; Popella, S.; Lorenz, S.; Scheubert, K.; Svatoš, A.; Werz, O. 2014. Inhibition of 5-lipoxygenase as anti-inflammatory mode of action of *Plectranthus zeylanicus* Benth and chemical characterization of ingredients by a mass spectrometric approach. *Journal of Ethnopharmacology* 151(2):800-809. https:// doi: 10.1016/j.jep.2013.11.004
- Naseef, H.; Al-Maharik, N.; Rabba, A.; Sharifi-Rad, M.; Hawash, M.; Jaradat, N. 2022. Phytochemical characterization and assessments of antimicrobial, cytotoxic and anti-inflammatory properties of *Lavandula coronopifolia* Poir. volatile oil from Palestine. *Arabian Journal of Chemistry* (2022) 15, 104069. doi.org/10.1016/j.arabjc.2022.104069
- Neelamkavil, S.V.; Thoppil, J.E. (2013). C-mitotic effect of aqueous extracts of *Isodon coetsa* (Buch.-Ham. ex D. Don) Kudo (Lamiaceae). *Nucleus*, 56(2), 117–122. https://doi.org/10.1007/s13237-013-0083-7.

- Neelamkavil, S.V.; Thoppil, J.E. (2014). Toxicological evaluation of polar and nonpolar components of *Isodon coetsa* (Lamiaceae). *Turkish Journal of Botany*, 38, 252-257. doi: 10.3906/bot-1306-4.
- Nguyen, D.T.X.; Tran, H.; Schwaiger, S.; Stuppner, H.; Marzocco, S. (2021). Effect of Non-Volatile Constituents of *Elsholtzia ciliata* (Thunb.) Hyl. from Southern Vietnam on Reactive Oxygen Species and Nitric Oxide Release in Macrophages. *Chemistry and Biodiversity*, 18(1), e2000577.
- Nicolescu, A.; Babotă, M.; Ilea, M.; Dias, M.I.; Calhelha, R.C.; Gavrilaş, L.; Rocchetti, G.; Crişan, G.; Mocan, A.; Barros, L.; Pârvu, A.E. (2022). Potential therapeutic applications of infusions and hydroalcoholic extracts of Romanian glutinous sage (*Salvia glutinosa* L.). *Frontiers in Pharmacology*, 13. <https://doi.org/10.3389/fphar.2022.975800>
- Nie, L.; Li, R., Huang, J.; Wang, L.; Ma, M.; Huang, C.; Wu, T.; Yan, R.; Hu, X. (2021) Abietane diterpenoids from *Dracocephalum moldavica* L. and their anti-inflammatory activities *in vitro*. *Phytochemistry*. 184:112680. doi: 10.1016/j.phytochem.2021.112680.
- Noorbakhsh, F.; Zare, S.; Firuzi, O.; Sakhteman, A.; Chandran, J.N.; Schneider, B.; Jassbi, A.R. (2022). Phytochemical Analysis and Biological Activity of *Salvia compressa* Vent. *Iranian Journal of Pharmaceutical Research*, 21(1). doi.org/10.5812/ijpr-127031
- Nworu, C.S.; Akah, P.A. (2015). Anti-inflammatory medicinal plants and the molecular mechanisms underlying their activities. *African Journal of Traditional, Complementary and Alternative Medicines*, 12(S1), 52-61. doi:10.4314/ajtcam.v12i5.3S.
- Oh, T.H.; Kim, S.S.; Yoon, W.J.; Kim, J.Y.; Yang, E.J.; Lee, N.H.; Hyun, C.G. 2009. Chemical composition and biological activities of Jeju *Thymus quinquecostatus* essential oils against *Propionibacterium* species inducing acne. *The Journal of General and Applied Microbiology*, 55 I 1 Pages 63-68. doi.org/10.2323/jgam.55.63
- Olennikov, D.N.; Chirikova, N.K.; Okhlopko, Z.M.; Zulfugarov, I.S. (2013). Chemical composition and antioxidant activity of *Tánara Ótó* (*Dracocephalum palmatum* Stephan), a medicinal plant used by the North-Yakutian nomads. *Molecules*, 18(11), 14105-14121. doi: 10.3390/molecules181114105.
- Oliveira, A. S.; Rolo, J.; Gaspar, C.; Cavaleiro, C.; Salgueiro, L.; Palmeira-de-Oliveira, R.; Ferraz, C.; Coelho, S.; Pastorinho, M.R.; Sousa, A.C.; Teixeira, J.P.; Martinez-de-Oliveira, J.; Palmeira-de-Oliveira, A. (2022). Chemical characterization and bioactive potential of *Thymus × citriodorus* (Pers.) Schreb. preparations for anti-acne applications: Antimicrobial, anti-biofilm, anti-inflammatory and safety profiles. *Journal of Ethnopharmacology*, 287. doi.org/10.1016/j.jep.2021.114935
- Oliveira, A.S.; Rolo, J.; Gaspar, C.; Ramos, L.; Cavaleiro, C.; Salgueiro, L.; Palmeira-de-Oliveira, R.; Teixeira, J. P.; Martinez-de-Oliveira, J.; Palmeira-de-Oliveira, A. (2023). *Thymus mastichina* (L.) L. and *Cistus ladanifer* L. for skin application: chemical characterization and in vitro bioactivity assessment. *Journal of Ethnopharmacology*, 302. <https://doi.org/10.1016/j.jep.2022.115830>

- Orfali, R.; Siddiqui, N.A.; Alam, P.; Alhowiriny, T.A.; Al-Taweel, A.M.; Al-Yahya, S.; Majrashi, N.M.; Mehmood, R.; Khan, S.I.; Perveen, S. (2018). Biological evaluation of different extracts of aerial parts of *Nepeta deflersiana* and standardization of active extracts using 8-Epi-7-Deoxyloganic acid and ursolic acid by Validated HPTLC method", *Evidence-Based Complementary and Alternative Medicine*, 2018, 8790769, 11. doi: <https://doi.org/10.1155/2018/8790769>.
- Osmakov, D.I.; Koshelev, S.G.; Belozerova, O.A.; ...Grishin, E.V.; Kozlov, S.A. (2015). Biological activity of Sevanol and its analogues. *Russian Journal of Bioorganic Chemistry*, 41(5), pp. 543–547.
- Osmakov, D.I.; Koshelev, S.G.; Belozerova, O.A.; ...Grishin, E.V.; Kozlov, S.A. (2015).The Biological Activity of the Sevanol and Its Analogues. *Bioorganicheskaia khimiia*, 41(5), pp. 606–611.
- Paksoy, M.Y.; Selvi, S.; Savran, A. (2016). Ethnopharmacological survey of medicinal plants in Ulukİşla (Niğde-Turkey). *Journal of Herbal Medicine*, 6(1), pp. 42–48.
- Pandey, A.K.; Singh, P.; Tripathi, N.N. (2014). Chemistry and bioactivities of essential oils of some *Ocimum* species: An overview. *Asian Pacific Journal of Tropical Biomedicine*, 4(9), pp. 682–694.
- Pandur, E.; Balatinácz, A.; Micalizzi, G.; Mondello, L.; Horváth, A.; Sipos, K.; Horváth, G. (2021). Anti-inflammatory effect of lavender (*Lavandula angustifolia* Mill.) essential oil prepared during different plant phenophases on THP-1 macrophages. *BMC Complementary Medicine and Therapies*, 21(1). doi.org/10.1186/s12906-021-03461-5
- Pandur, E.; Micalizzi, G.; Mondello, L.; Horváth, A.; Sipos, K.; Horváth, G. (2022). Antioxidant and Anti-Inflammatory Effects of Thyme (*Thymus vulgaris* L.) Essential Oils Prepared at Different Plant Phenophases on Pseudomonas aeruginosa LPS-Activated THP-1 Macrophages. *Antioxidants*, 11(7). doi.org/10.3390/antiox11071330
- Pargaien, A. V., Bisht, N., Joshi, H., Pargaien, S., Adhikari, M. (n.d.). Analysis of ethanomedicinally potential extract of *Nepeta cataria*. In Copyright@ EM International (Vol. 26).
- Park, S.H.; Koo, H J.; Sung, Y.Y.; Kim, H.K. (2013). The protective effect of *Prunella vulgaris* ethanol extract against vascular inflammation in TNF- $\alpha$ -stimulated human aortic smooth muscle cells. *BMB Reports*, 46(7), 352–357. doi.org/10.5483/BMBRep.2013.46.7.214
- Park, S.; Kim, S.; Suk, K.; Lee, H.; Kwon, T.; Ju, M.; Jeon, H.; Kim, D.; Lim, J.; Shin, T. (2010) *Clinopodium gracile* inhibits mast cell-mediated allergic inflammation: involvement of calcium and nuclear factor-kappaB. *Experimental Biological Medicine*, 235(5), 606-613. doi: 10.1258/ebm.2010.009292. PMID: 20463301
- Parsaei, P.; Bahmani, M.; Karimi, M.; Naghdi, N.; Asadi-Samani, M.; Rafieian-Kopaei, M. (2016). A review of analgesic medicinal plants in Iran. *Der Pharmacia Lettre*, 8(2), 43-51. Retrieved from [www.scopus.com](http://www.scopus.com)

- Pattanayak, P.; Behera, P.; Das, D.; Panda, S. (2010). *Ocimum sanctum* Linn. A reservoir plant for therapeutic applications: An overview. In *Pharmacognosy Reviews*, 4(7), 95–105. doi.org/10.4103/0973-7847.65323
- Pavel, M.; Vostinaru, O.; Mogosan, C.; Ghibu, S. (2011). Phytochemical and pharmacological research on some extracts obtained from Serpylli herba. *Farmacia*, 59(1), 77–84.
- Peana, A.T.; Moretti, M.D.L. (2002). Pharmacological activities and applications of *Salvia sclarea* and *Salvia desoleana* essential oils doi:10.1016/S1572-5995(02)80012-6 Retrieved from www.scopus.com
- Peana, A.T.; Moretti, M.D.L., Juliano, C. (1999). Chemical composition and antimicrobial action of the essential oils of *Salvia desoleana* and *S. sclarea*. *Planta Medica*, 65(8), 752-754. doi:10.1055/s-2006-960857
- Peana, A.; Satta, M. (1993). A preliminary research on essential oils of *Salvia sclarea* l. and *Salvia desoleana* A. et p. *Pharmacological Research*, 27, 25-26. doi:10.1006/phrs.1993.1048
- Petrova, M.; Dimitrova, L.; Dimitrova, M.; ...Lazarova, M.; Tasheva, K. (2023). Antitumor and Antioxidant Activities of *In Vitro* Cultivated and Wild-Growing *Clinopodium vulgare* L. Plants. *Plants*, 12(8), 1591
- Piccinelli A.C.; Figueiredo de Santana Aquino D.; Morato P.N.; Kuraoka-Oliveira A.M.; Strapasson R.L.; Dos Santos E.P.; Stefanello M.É.; Oliveira R.J.; Kassuya C.A. 2014. Anti-inflammatory and antihyperalgesic activities of ethanolic extract and fruticulin A from *Salvia lachnostachys* leaves in mice. Evidence Based Complementary and Alternative Medicine 2014:835914. https://doi: 10.1155/2014/835914
- Piva, R.C.; Verdan, M.H.; Branquinho, L.S.; Kassuya, C.A.L.; Cardoso, C.A.L. (2021). Anti-inflammatory activity and chemical composition of aqueous extract and essential oil from leaves of *Ocimum selloi* Benth. *Journal of Ethnopharmacology*, 275. https://doi.org/10.1016/j.jep.2021.114136
- Porres-Martínez, M.; Accame, M.E.C.; Gómez-Serranillos, M.P. (2013). Pharmacological activity of *Salvia lavandulifolia* and chemical components of its essential oil. A review. *Lazaroa* (Vol. 34, pp. 237–254). Universidad Complutense. https://doi.org/10.5209/rev\_LAZA.2013.v34.n1.43298
- Prescott, T.A.K.; Veitch, N.C.; Simmonds, M.S.J. (2011). Direct inhibition of calcineurin by caffeoyl phenylethanoid glycosides from *Teucrium chamaedrys* and *Nepeta cataria*. *Journal of Ethnopharmacology*, 137(3), 1306–1310. https://doi.org/10.1016/j.jep.2011.07.063
- Pudziuelyte, L.; Liaudanskas, M.; Jekabsone, A.; Sadauskiene, I., (2020). Bernatoniene, J. *Elsholtzia ciliata* (Thunb.) Hyl. extracts from different plant parts: Phenolic composition, antioxidant, and anti-inflammatory activities. *Molecules*, 25(5), 1153.



- Qadir, M.I.; Parveen, A.; Abbas, K.; Ali, M. 2016. Analgesic, anti-inflammatory and anti-pyretic activities of *Thymus Linearis*. Pak. J. Pharm. Sci., 29, 2, 2016, pp.591-594.
- Qi, J.; Zhang, Q.; Li, L.; ...Wang, N.; Peng, D. (2022). Spectrum-effect relationship between UPLC-Q-TOF-MS fingerprint and anti-AUB effect of *Clinopodium chinense* (Benth.) O. Kuntze. *Journal of Pharmaceutical and Biomedical Analysis*, 217, 114828. <https://doi.org/10.1016/j.jpba.2022.114828>.
- Raal, A.; Paaver, U.; Arak, E.; Orav, A. (2004). Content and composition of the essential oil of *Thymus serpyllum* L. growing wild in Estonia. *Medicina (Kaunas)*, 40(8), 795–800.
- Righi, N.; Boumerfeg, S.; Deghima, A.; ...Coimbra, M.A.; Baghiani, A. (2021). Phenolic profile, safety assessment, and anti-inflammatory activity of *Salvia verbenaca* L. *Journal of Ethnopharmacology*, 272, 113940.
- Rocha, J.; Direito, R.; Lima, A.; Mota, J.; Gonçalves, M.; Duarte, M.P.; Solas, J.; Peniche, B.F.; Fernandes, A.; Pinto, R.; Ferreira, R.B.; Sepodes, B.; Figueira, M.E. (2019). Reduction of inflammation and colon injury by a Pennyroyal phenolic extract in experimental inflammatory bowel disease in mice. *Biomedicine and Pharmacotherapy*, 118. [doi.org/10.1016/j.biopha.2019.109351](https://doi.org/10.1016/j.biopha.2019.109351)
- Rodríguez Basso, A.; Carranza, A.; Zainutti, V.M.; Bach, H.; Gorzalczany, S.B. (2021). Pharmacological activity of peperina (*Mintostachys verticillata*) on gastrointestinal tract. *Journal of Ethnopharmacology*, 269. <https://doi.org/10.1016/j.jep.2020.113712>
- Rowshan, V.; Najafian, S. (2020). Polyphenolic contents and antioxidant activities of aerial parts of *Salvia multicaulis* from the Iran flora. *Natural Product Research*, 34(16), 2351-2353. [doi:10.1080/14786419.2018.1533832](https://doi.org/10.1080/14786419.2018.1533832)
- Roxana, S.P.; Vivian, M.C.; Yazmín, R.C.; Daisy, C.Q.; Victor, G.C.; David, M.D.; . . . Lourdes, A.V. (2012). Effects of a hydroalcoholic extract from cuban population of *Salvia coccinea* L. on a model of acute inflammation. *Revista Electronica De Veterinaria*, 13(6).
- Roxo, M.; Zuzarte, M.; Gonçalves, M.J. et al. 2020. Antifungal and anti-inflammatory potential of the endangered aromatic plant *Thymus albicans*. (2020) 10:18859. [doi.org/10.1038/s41598-020-75244-w](https://doi.org/10.1038/s41598-020-75244-w).
- Ruiz-Malagón, A.J.; Rodríguez-Sanchez, M.J.; Rodríguez-Sojo, M.J.; Vezza, T.; Pischel, I.; Algieri, F.; Rodríguez-Cabezas, M.E.; Rodríguez-Nogales, A.; Gálvez, J. (2022). Intestinal anti-inflammatory and visceral analgesic effects of a *Serpylli herba* extract in an experimental model of irritable bowel syndrome in rats. *Frontiers in Pharmacology*, 13. [doi.org/10.3389/fphar.2022.967644](https://doi.org/10.3389/fphar.2022.967644)

- Ruiz-Malagón, A.J., Rodríguez-Sojo, M.J., Hidalgo-García, L., Molina-Tijeras, J.A., García, F., Pischel, I., Romero, M., Duarte, J., Diez-Echave, P., Rodríguez-Cabezas, M.E.; Rodríguez-Nogales, A.; Gálvez, J. (2022b). The Antioxidant Activity of *Thymus serpyllum* Extract Protects against the Inflammatory State and Modulates Gut Dysbiosis in Diet-Induced Obesity in Mice. *Antioxidants*, 11(6). doi.org/10.3390/antiox11061073
- Ruppelt, B.M.; Pereira, E.F.; Gonçalves, L.; Pereira, N.A. (1991). Pharmacological screening of plants recommended by folk medicine as anti-snake venom-I. Analgesic and anti-inflammatory activities. *Memorias do Instituto Oswaldo Cruz*, 86(2), 203-5.
- Ryu, S.Y.; Oak, M.-H.; Yoon, S.-K.; Cho, D.-I.; Yoo, G.-S.; Kim, T.-S.; Kim, K.-M.; Thieme, G.; Stuttgart, V.; York, N. (2000). Anti-Allergic and Anti-Inflammatory Triterpenes from the Herb of *Prunella vulgaris*. *Planta Medica*, 66, 358.
- Sahrial, I.; Solfaine, R. (2019). *Coleus amboinicus* extract increases transforming growth factor-1 $\beta$  expression in Wistar rats with cisplatin-induced nephropathy. *Veterinary World*, 12(8): 1346-1351. doi: 10.14202/vetworld.2019.1346-1351.
- Salehi, B.; Mishra, A.P.; Shukla, I.; Sharifi-Rad, M.; Contreras, M. del M.; Segura-Carretero, A.; Fathi, H.; Nasrabadi, N.N.; Kobarfard, F.; Sharifi-Rad, J. (2018). Thymol, thyme, and other plant sources: Health and potential uses. *Phytotherapy Research*, (Vol. 32, Issue 9, pp. 1688–1706). John Wiley and Sons Ltd. doi.org/10.1002/ptr.6109
- Sánchez-Tito, J.; Cartagena-Cutipa, R.; Flores-Valencia, E. (2021). Chemical composition and antimicrobial activity of essential oil from *Minthostachys mollis* against oral pathogens. *Revista Cubana de Estomatología*, 58(4), e3647. www.revestomatologia.sld.cu/index.php/est/article/view/3647
- Santana, F.R.; de Santana Souza, M.T.; Camargo, E. A.; Silva, J.A. (2022). Anti-inflammatory and antinociceptive effects of a pectinolide-enriched fraction from *Mesosphaerum pectinatum* (L.) Kuntze. *Journal of Ethnopharmacology*, 115916. doi.org/10.1016/j.jep.2022.115916
- Saoulajan, C.; Boujida, N.; El Mihyaoui, A.; El Baakili, A.; Alshahrani, M.M.; Lee, L. -.; Bouyahya, A. (2022). Phytochemistry, pharmacological investigations, industrial applications, and encapsulation of *Thymbra capitata* L., a review. *Trends in Food Science and Technology*, 129, 463-491. doi:10.1016/j.tifs.2022.10.014.
- Sarikurkcü, C.; Sabih Ozer, M.; Eskici, M.; Tepe, B.; Can, S.; Mete, E., 2010. Essential oil composition and antioxidant activity of *Thymus longicaulis* C. Presl subsp. *longicaulis* var. *longicaulis*. *Food Chem. Toxicol.* 48, 1801–1805.
- Semaoui, R.; Ouafi, S.; Machado, S.; Barros, L.; Ferreira, I.C.F.R.; Oliveira, M.B.P.P. (2021). Infusion of aerial parts of *Salvia chudaiei* Batt. Trab. from Algeria: Chemical, toxicological and bioactivities characterization. *Journal of Ethnopharmacology*, 280. doi.org/10.1016/j.jep.2021.114455

- Shabbir, A.; Batool, S.A.; Basheer, M.I.; Shahzad, M.; Sultana, K.; Tareen, R.B.; Iqbal, J.; Saeed-ul-Hassan. (2018). *Ziziphora clinopodioides* ameliorated rheumatoid arthritis and inflammatory paw edema in different models of acute and chronic inflammation. *Biomedicine and Pharmacotherapy*, 97, 1710–1721. doi.org/10.1016/j.biopha.2017.11.118
- Shaikh, R.; Pund, M.; Dawane, A.; Iliyas, S. (2014). Evaluation of anticancer, antioxidant, and possible anti-inflammatory properties of selected medicinal plants used in Indian traditional medication. *Journal of Traditional and Complementary Medicine*, 4(4), 253-257.
- Shan, M.; Jiang, Y.; Fu, Y.; ...Zhang, L.; Wu, Q. (2021). A review of the botany, traditional uses, phytochemistry and pharmacology of *Nepeta tenuifolia* Briq. *Phytochemistry Reviews*, 20(5), pp. 991–1012.
- Shanaida, M.; Hudz, N.; Jasicka-Misiak, I.; Wieczorek, P.P. (2021). Polyphenols and Pharmacological Screening of a *Monarda fistulosa* L. dry Extract Based on a Hydrodistilled Residue By-Product. *Frontiers in Pharmacology*, 12. https://doi.org/10.3389/fphar.2021.563436
- Shanaida, M.; Jasicka-Misiak, I.; Bialon, M.; Korablova, O.; Wieczorek, P.P. (2021). Chromatographic profiles of the main secondary metabolites in the *Monarda fistulosa* l. Aerial part. *Research Journal of Pharmacy and Technology*, 14(4), 2179–2184. https://doi.org/10.52711/0974-360X.2021.00385
- Shanmugam, G.; Sundaramoorthy, A.; Shanmugam, N. (2021). Biosynthesis of silver nanoparticles from leaf extract of *Salvia coccinea* and its effects of anti-inflammatory potential in human monocytic THP-1 cells. *ACS Applied Bio Materials*, 4(12), 8433-8442. doi:10.1021/acsabm.1c00963
- Sharifabad, A.H.; Sadraei, H.; Hashemnia, M.; Sajjadi, S.E.; Mirdamadi, Z. (2021). Effect of hydroalcoholic and aqueous extracts of *Dracocephalum kotschyi* on bleomycin induced pulmonary fibrosis. *Journal of HerbMed Pharmacology*, 10(2), 209–217. https://doi.org/10.34172/jhp.2021.23
- Sharifi-Rad, M.; Berkay Yılmaz, Y.; Antika, G.; Salehi, B.; Tumer, T. B.; Kulandaisamy Venil, C.; Das, G.; Patra, J. K.; Karazhan, N.; Akram, M.; Iqbal, M.; Imran, M.; Sen, S.; Acharya, K.; Dey, A.; Sharifi-Rad, J. (2021). Phytochemical constituents, biological activities, and health-promoting effects of the genus *Origanum*. *Phytotherapy Research*, (Vol. 35, Issue 1, pp. 95–121). John Wiley and Sons Ltd. doi.org/10.1002/ptr.6785
- Shehadeh, M. B.; Sosa, S.; Suaifan, Darwish, R. M.; Giangaspero, A.; Vassallo, A.; Lepore, L.; Oran, S.; Hammad, H.; Tubaro, A.; De Tommasi, N.; Loggia, R. D. (2014). Topical anti-inflammatory potential of six *Salvia* species grown in Jordan. *Jordan Journal of Pharmaceutical Sciences*, 7(2), 153-161. doi:10.12816/0026806
- Shen, W.; Anwaier, G.; Cao, Y.; Lian, G.; Chen, C.; Liu, S.; Tuerdi, N.; Qi, R. (2019). Atheroprotective Mechanisms of Tilianin by Inhibiting Inflammation Through Down-Regulating NF-κB Pathway and Foam Cells Formation. *Frontiers in Physiology*, 10. doi.org/10.3389/fphys.2019.00825

- Sheychenko, O.P.; Sheychenko, V.I.; Goryainov, S.V.; Zvezdina, E.V.; Kurmanova, E.N.; Ferubko, E.V.; Uyutova, E.V.; Potanina, O.G.; Fadi, K. (2021). Chemical composition and biological activity of the dry extract “Rosmatin” from the herb of *Dracocephalum moldavica* L. *Khimiya Rastitel'nogo Syr'ya*, 3, 253–264. doi.org/10.14258/JCPRM.2021039161
- Shi, Q.Q.; Dang, J.; Wen, H.X.; Yuan, X.; Tao, Y.D.; Wang, Q.L. (2016). Anti-hepatitis, antioxidant activities and bioactive compounds of *Dracocephalum heterophyllum* extracts. *Botanical Studies*, 57(1):16. doi: 10.1186/s40529-016-0133-y.
- Shimizu, M.; Shogawa, H.; Matsuzawa, T.; ...Suzuki, S.; Berganza, A. (1990). Anti-inflammatory Constituents of Topically Applied Crude Drugs: IV: Constituents And Anti-inflammatory Effect of Paraguayan Crude Drug “Alhucema” (*Lavandula latifolia* Vill.). *Chemical and Pharmaceutical Bulletin*, 38(8), pp. 2283–2284
- Shin, T.Y.; Kim, S.H.; Choi, C.H.; Shin, H.Y.; Kim, H.M. (2004). *Isodon japonicus* decreases immediate-type allergic reaction and tumor necrosis factor- $\alpha$  production. *International Archives of Allergy and Immunology*, 135(1), 17–23. https://doi.org/10.1159/000080038
- Shin, T.Y.; Kim, S.H.; Suk, K.; Ha, J.H.; Kim, I.K.; Lee, M.G.; Jun, C.D.; Kim, S.Y.; Lim, J.P.; Eun, J.S.; Shin, H.Y.; Kim, H.M. (2005). Anti-allergic effects of *Lycopus lucidus* on mast cell-mediated allergy model. *Toxicology and Applied Pharmacology*, 209(3), 255–262. doi.org/10.1016/j.taap.2005.04.011
- Shipa, S.J.; Khandokar, L.; Bari, M.S.; ...Haque, M.A.; Mohamed, I.N. (2022). An insight into the anti-ulcerogenic potentials of medicinal herbs and their bioactive metabolites. *Journal of Ethnopharmacology*, 293, 115245.
- Singh, D.; Chaudhuri, P.K. (2018). A review on phytochemical and pharmacological properties of Holy basil (*Ocimum sanctum* L.). In *Industrial Crops and Products* (Vol. 118, pp. 367–382). Elsevier B.V. doi.org/10.1016/j.indcrop.2018.03.048
- Singh, M.K.; Gidwani, B.; Gupta, A.; Dhongade, H.; Kaur, C.D.; Kashyap, P.P.; Tripathi, D.K. (2015). A review of the medicinal plants of genus *Orthosiphon* (Lamiaceae). *International Journal of Biological Chemistry*, 9(6), 318–331. doi.org/10.3923/ijbc.2015.318.331
- Sitarek, P.; Kowalczyk, T.; Synowiec, E.; Merecz-Sadowska, A.; Bangay, G.; Princiotta, S.; Sliwinski, T.; Rijo, P. 2022. An evaluation of the novel biological properties of diterpenes isolated from *Plectranthus ornatus* Codd. In vitro and in silico. *Cells* 11, 3243. https://doi.org/10.3390/cells11203243.
- Slighoua, M.; Mahdi, I.; Ez-zahra Amrati, F.; Boucetta, N.; Cristo, F.; di, Boukhira, S.; el youbi el Hamsas, A.; Tattou, M.I.; Grafov, A.; Bari, A.; Bousta, D. (2022). Pharmacological effects of *Lavandula officinalis* Chaix and its polyphenols: Focus on their in vivo estrogenic and anti-inflammatory properties. *South African Journal of Botany*, 146, 354–364. doi.org/10.1016/j.sajb.2021.11.014

- Solfaine, R.; Muniroh, L.; Sadarman, A.; Irawan, A. (2021). Anti-inflammatory effect of *Coleus amboinicus* leaves extract on uric acid-induced nephrotoxicity rats. *Advances in Animal and Veterinary Sciences*, 9(10), 1553-1558. doi:10.17582/journal.aavs/2021/9.10.1553.1558.
- Sonboli, A.; Kanani, M.R.; Yousefzadi, M.; Mojarad, M. (2009). Chemical composition and antibacterial activity of the essential oil of *Salvia hydrangea* from two localities of Iran. *Journal of Medicinal Plants*, 8(30), 20-28+172.
- Soosani, B Sazegar, H. (2018). Effects of *Thymus daenensis* on inflammatory factors and liver toxicity induced by thioacetamide in rats. *J Herbmed Pharmacol* 7(1): 56-60. doi: 10.15171/jhp.2018.10
- Sosa, S.; Altinier, G.; Politi, M.; Braca, A.; Morelli, I.; Della Loggia, R. 2005. Extracts and constituents of *Lavandula multifida* with topical anti-inflammatory activity. *Phytomedicine* 12 (2005) 271–277. doi:10.1016/j.phymed.2004.02.007.
- Souri, F.; Rakhshan, K.; Erfani, S.; Azizi, Y.; Maleki, S.; Aboutaleb, N. (2019). Natural lavender oil (*Lavandula angustifolia*) exerts cardioprotective effects against myocardial infarction by targeting inflammation and oxidative stress. *Inflammopharmacology*, 27(4), 799–807.
- Sousa, P.J.; Linard, C.; Azevedo-Batista, D.; Oliveira, A.C.; Coelho-de-Souza, A.N.; Leal-Cardoso, J.H. 2009. Antinociceptive effects of the essential oil of *Mentha x villosa* leaf and its major constituent piperitenone oxide in mice. *Brazilian Journal of Medical and Biological Research*, (2009) 42: 655-659.
- Sudaramoorthy, A.; Shanmugam, G.; Shanmugam, N. (2021). Inhibitory effect of *Salvia coccinea* on inflammatory responses through NF-κB signaling pathways in THP-1 cells and acute rat *diabetes mellitus*. *Acta Histochemica*, 123(5) doi:10.1016/j.acthis.2021.151735
- Sun J.; Sun P.; Kang C.; Zhang L.; Guo L.; Kou Y. 2022. Chemical composition and biological activities of essential oils from six Lamiaceae folk medicinal plants. *Frontiers in Plant Science* 13:919294. https://doi: 10.3389/fpls.2022.919294.
- Sun, Z.; Wang, H.; Wang, J.; Zhou, L.; Yang, P. (2014). Chemical composition and anti-inflammatory, cytotoxic and antioxidant activities of essential oil from leaves of *Mentha piperita* grown in China. *PLoS ONE*, 9(12). doi.org/10.1371/journal.pone.0114767
- Süntar, I.; Nabavi, S.M.; Barreca, D.; Fischer, N.; Efferth, T. (2018). Pharmacological and chemical features of *Nepeta* L. genus: Its importance as a therapeutic agent. *Phytotherapy Research*, 32, 185–198. doi: 10.1002/ptr.5946.

- Taarit, M.B.; Msaada, K.; Hosni, K.; Chahed, T.; Marzouk, B. (2010). Essential oil composition of *Salvia verbenaca* L. growing wild in Tunisia. *Journal of Food Biochemistry*, 34(1), pp. 142–151.
- Tadesse, S.; Mazumder, A.; Bucar, F.; Veeresham, C. Asres, K. (2011). Chemical composition and biological activities of the essential oil of *Plectranthus caninus* Roth. *Pharmacognosy Journal*, 3(26), 1–7. doi.org/10.5530/pj.2011.26.1
- Taheri, S.; Khalifeh, S.; Shajiee, H.; Ashabi, G. (2021). Dietary uptake of *Salvia macilenta* extract improves Nrf2 antioxidant signaling pathway and diminishes inflammation and apoptosis in amyloid beta-induced rats. *Molecular Biology Reports*, 48(12), 7667–7676. doi.org/10.1007/s11033-021-06772-5.
- Tang, Y.Q.N.; Deng, J.; Li, L.; Yan, J.; Lin, L.M.; Li, Y. M.; Lin, Y.; Xia, B.H. (2022). Essential oil from *Prunella vulgaris* L. as a valuable source of bioactive constituents: *In vitro* anti-bacterial, anti-viral, immunoregulatory, anti-inflammatory, and chemical profiles. *South African Journal of Botany*, 151, 614–627. doi.org/10.1016/j.sajb.2022.10.029
- Taşkın, T.; Emin Çam, M.; Bulut, G.; Nur Hazar-Yavuz, A.; Kabasakal, L.; Bitiş, L. (2018) Antioxidant and anti-inflammatory activities of *Phlomis pungens* and *Coridothymus capitatus*. *Marmara Pharmaceutical Journal*: 22(1), 80-85. dx.doi.org/10.12991/mpj.2018.44
- Taşkın, T.; Çam, M.E.; Taşkın, D. et al. 2019. *In vitro* and *In vivo* biological activities and phenolic characterization of *Thymus praecox* subsp. *skorpilii* var. *skorpilii*. *Journal of Food Measurement and Characterization* (2019) 13:536–544 https://doi.org/10.1007/s11694-018-9967-1
- Taskin, T.; Dogan, M.; Cam, M. E.; Sahin, T.; Senkardes, I. (2020). In vitro anti-urease, antioxidant, anticholinesterase, cytotoxic and in vivo anti-inflammatory potential of *Satureja cuneifolia* Ten. *Notulae Scientia Biologicae*, 12(2), 222–232. doi.org/10.15835/nsb12210687
- Tepe, B.; Cakir, A.; Sihoglu Tepe, A. (2016). Medicinal Uses, Phytochemistry, and Pharmacology of *Origanum onites* (L.): A Review. *Chemistry and Biodiversity* (Vol. 13, Issue 5, pp. 504–520). Wiley-VCH Verlag. https://doi.org/10.1002/cbdv.201500069
- Thawkar, B.; Jawarkar, A.G.; Kalamkar, P.; Pawar, K.; Kale, M.K. (2016). Phytochemical and pharmacological review of *Mentha arvensis*. *International Journal of Green Pharmacy*, 10(2), 71–76. www.researchgate.net/publication/316256954
- Tsioutsiou, E.E.; Amountzias, V.; Vontzalidou, A.; Dina, E.; Stevanović, Z.D.; Cheilari, A.; Aligiannis, N. (2022). Medicinal plants used traditionally for skin related problems in the south balkan and east mediterranean Region—A review. *Frontiers in Pharmacology*, 13 doi:10.3389/fphar.2022.936047

- Tubon, I.; Zannoni, A.; Bernardini, C.; Salaroli, R.; Bertocchi, M.; Mandrioli, R.; Vinueza, D.; Antognoni, F.; Forni, M. 2019. *In vitro* anti-inflammatory effect of *Salvia sagittata* ethanolic extract on primary cultures of porcine aortic endothelial cells. *Oxidative Medicine and Cellular Longevity* 2019:6829173. [https://doi: 10.1155/2019/6829173](https://doi.org/10.1155/2019/6829173)
- Tubon, I.; Bernardini, C.; Antognoni, F.; Mandrioli, R.; Potente, G.; Bertocchi, M.; Vaca, G.; Zannoni, A.; Salaroli, R.; Forni, M. (2020). *Clinopodium tomentosum* (Kunth) Govaerts Leaf Extract Influences in vitro Cell Proliferation and Angiogenesis on Primary Cultures of Porcine Aortic Endothelial Cells. *Oxidative Medicine and Cellular Longevity*, 2020. [doi.org/10.1155/2020/2984613](https://doi.org/10.1155/2020/2984613)
- Ueda, H.; Yamazaki, C.; Yamazaki, M. (2002). Luteolin as an anti-inflamantory and anti-allergic constituent of *Perilla frutescens*. *Biological Pharmaceutical Bulletin*, 25(9), 1197–1202.
- Ulikhanyan, G.; Galstyan, H.; Dumanyan, K.; Beglaryan, M.; Poghosyan, G.; Shekoyan, V.; Ananikyan, H.; Ananikyan, V.; Goginyan, V.; Ulikhanyan, G.; Chichoyan, N.; Taschyan, S. (2022). The study of the biological activities of *Ziziphora clinopodioides*. *Brazilian Journal of Pharmaceutical Sciences*, 58. [doi.org/10.1590/s2175-97902022e19331](https://doi.org/10.1590/s2175-97902022e19331)
- Ustuner, O.; Anlas, C.; Bakirel, T.; ...Donmez, C.; Koca-Caliskan, U. (2019). *In vitro* evaluation of antioxidant, anti-inflammatory, antimicrobial and wound healing potential of *Thymus sipyleus* Boiss. subsp. *rosulans* (Borbas) Jalas. *Molecules*, 24(18), 3353.
- Vairinhos, J.; Miguel, M.G. (2020). Essential oils of spontaneous species of the genus *Lavandula* from Portugal: A brief review. *Zeitschrift fur Naturforschung - Section C Journal of Biosciences*, 75(78), pp. 233–245.
- Vazirian, F.; Samadi, S.; Abbaspour, M.; ...Mohammadpour, A.H.; Emami, S.A. (2022). Evaluation of the efficacy of *Thymus kotschyanus* extract as an additive treatment in patients with ulcerative colitis: a randomized double-blind placebo-controlled trial. *Inflammopharmacology*, 30(6), pp. 2145–2152
- Verano, J.; González-Trujano, M. E.; Déciga-Campos, M.; Ventura-Martínez, R.; Pellicer, F. (2013). Ursolic acid from *Agastache mexicana* aerial parts produces antinociceptive activity involving TRPV1 receptors, cGMP and a serotonergic synergism. *Pharmacology Biochemistry and Behavior*, 110, 255–264. <https://doi.org/10.1016/j.pbb.2013.07.020>
- Vergara-Martínez, V.M.; Estrada-Soto, S.E.; Valencia-Díaz, S.; Garcia-Sosa, K.; Peña-Rodríguez, L.M.; de Jesús Arellano-García, J.; Perea-Arango, I. (2021). Methyl jasmonate enhances ursolic, oleanolic and rosmarinic acid production and sucrose induced biomass accumulation, in hairy roots of *Lepechinia caulescens*. *PeerJ*, 9, 1–18. [doi.org/10.7717/peerj.11279](https://doi.org/10.7717/peerj.11279)
- Vijayan, C.; Murugan, K.; Reji, S.; Nair, G. (2017). Screening biological activities of *Orthosiphon aristatus*: some observations. *International Journal of Advanced Research*, 5(12), 757–764. [doi.org/10.21474/IJAR01/6016](https://doi.org/10.21474/IJAR01/6016)
- Villaseñor, I. M.; Angelada, J.; Canlas, A. P.; Echegoyen, D. (2002). Bioactivity studies on  $\beta$ -sitosterol and its glucoside. *Phytotherapy Research*, 16(5), 417–421. [doi.org/10.1002/ptr.910](https://doi.org/10.1002/ptr.910)

- Vladimir-Knežević, S.; Cvijanović, O.; Blažeković, B.; Kindl, M.; Štefan, M.B.; Domitrović, R. (2015). Hepatoprotective effects of *Micromeria croatica* ethanolic extract against CCl<sub>4</sub>-induced liver injury in mice. *BMC Complementary and Alternative Medicine*, 15(1). doi.org/10.1186/s12906-015-0763-8
- Vogl, S.; Picker, P.; Mihaly-Bison, J.; Fakhrudin, N.; Atanasov, A.G.; Heiss, E.H.; Wawrosch, C.; Reznicek, G.; Dirsch, V.M.; Saukel, J.; Kopp, B. (2013). Ethnopharmacological *in vitro* studies on Austria's folk medicine - An unexplored lore *in vitro* anti-inflammatory activities of 71 Austrian traditional herbal drugs. *Journal of Ethnopharmacology*, 149(3), 750–771. doi.org/10.1016/j.jep.2013.06.007
- Vulganová, K.; Maliar, T.; Maliarová, M.; Nemeček, P.; Viskupičová, J.; Balážová, A.; Sokol, J. (2019). Biologically valuable components, antioxidant activity and proteinase inhibition activity of leaf and callus extracts of *Salvia* sp. *Nova Biotechnologica et Chimica*, 18(1), 25-36. doi:10.2478/nbec-2019-0004
- Wan, J.; Liu, M.; Jiang, H.Y.; Yang, J.; Du, X.; Li, X.N.; Wang, W.G.; Li, Y.; Pu, J.X.; Sun, H.D. (2016). Bioactive ent-kaurane diterpenoids from *Isodon serra*. *Phytochemistry*, 130, 244–251. doi.org/10.1016/j.phytochem.2016.05.014
- Wang, M.; Dai, H.; Li, X.; ...Wang, L.; Xue, M. (2010). Structural elucidation of metabolites of tanshinone I and its analogue dihydrotanshinone I in rats by HPLC-ESI-MSn. *Journal of Chromatography B: Analytical Technologies in the Biomedical and Life Sciences*, 878(13-14), pp. 915–924.
- Wang, M.; Wang, Y.; Shi, L.; Lu, Y.; Zhu, H.; Liang, L.; Sun, Z. L. (2022). A New Phenylpropanoid-Substituted Flavan-3-ol from Aerial Part of *Mentha longifolia*. *Chemistry of Natural Compounds*, 58(2), 237–239. doi.org/10.1007/s10600-022-03649-2
- Wang, X.; Cheng, K.; Liu, Z.; Sun, Y.; Zhou, L.; Xu, M.; Dai, X.; Xiong, Y.; Zhang, H. (2021). Bioactive constituents of *Mosla chinensis*-cv. Jiangxiangru ameliorate inflammation through MAPK signaling pathways and modify intestinal microbiota in DSS-induced colitis mice. *Phytomedicine* 93,153804. doi: 10.1016/j.phymed.2021.153804.
- Wang, Y.Y.; Lin, S.Y.; Chen, W.Y.; Liao, S.L.; Wu, C.C.; Pan, P.H.; Chou, S.T.; Chen, C.J. (2017). *Glechoma hederacea* extracts attenuate cholestatic liver injury in a bile duct-ligated rat model. *Journal of Ethnopharmacology*, 204, 58–66. doi.org/10.1016/j.jep.2017.04.011
- Wang, Y.; Shao, Z.; Song, C.; ...Zhou, G.; Meng, D. (2023). *Clinopodium chinense* Kuntze ameliorates dextran sulfate sodium-induced ulcerative colitis in mice by reducing systematic inflammation and regulating metabolism. *Journal of Ethnopharmacology*, 309, 116330.
- Wang, Z.; Hwang, S.H.; Guillen Quispe, Y.N.; Gonzales Arce, P.H.; Lim, S.S. (2017). Investigation of the antioxidant and aldose reductase inhibitory activities of extracts from Peruvian tea plant infusions. *Food Chemistry*, 231, 222–230. http://dx.doi.org/10.1016/j.foodchem.2017.03.107.



- Wu, H.-Y.; Wang, W.-G.; Du, X.; Yang, J.; Pu, J.-X.; Sun, H.-D. (2015). Six new cytotoxic and anti-inflammatory 11, 20-epoxy-ent-kaurane diterpenoids from *Isodon wikstroemioides*. *Chinese Journal of Natural Medicines*, 13(5), 383–389.
- Wu, H.-Y.; Wang, W.-G.; Jiang, H.-Y.; Du, X.; Li, X.-N.; Pu, J.-X.; Sun, H.-D. (2014). Cytotoxic and anti-inflammatory ent-kaurane diterpenoids from *Isodon wikstroemioides*. *Fitoterapia*, 98, 192–198. <http://dx.doi.org/10.1016/j.fitote.2014.08.012>.
- Wu, S.J.; Chan, H.H.; Hwang, T.L.; Qian, K.; Morris-Natschke, S.; Lee, K.H.; Tian-Shung Wu, T.S. 2010. Salviatalin A and salvitrijudin A, two diterpenes with novel skeletons from roots of *Salvia digitaloides* and anti-inflammatory evaluation. *Tetrahedron Letters* 51(32):4287-4290. DOI: <https://10.1016/j.tetlet.2010.06.048>.
- Wu, Y.; Wang, Y.; Liu, X.; Jiang, L.; Guli, A.; Sailike, J.; Sun, X.; Abuduwaili, N.; Tuoliuhan, H.; Maney, K.; Nabi, X. (2020). *Ziziphora clinopodioides* flavonoids based on network pharmacology attenuates atherosclerosis in rats induced by high-fat emulsion combined with vitamin D3 by down-regulating VEGF/AKT/NF-κB signaling pathway. *Biomedicine and Pharmacotherapy*, 129. [doi.org/10.1016/j.biopha.2020.110399](https://doi.org/10.1016/j.biopha.2020.110399).
- Xia, F.; Wu, C.Y.; Yang, X.W.; Li, X.; Xu, G. 2015. Diterpenoids from the Roots of *Salvia yunnanensis*. *Nat. Prod. Bioprospect.* (2015) 5:307–312. [doi.10.1007/s13659-015-0080-4](https://doi.org/10.1007/s13659-015-0080-4).
- Xiang, Z.; Wu, X.; Liu, X.; Jin, Y. (2014). Glaucocalyxin A: a review. *Natural Product Research*, 28:24, 2221-2236. <https://doi.org/10.1080/14786419.2014.934235>.
- Xie, Q.; Wang, Y.; Zou, G.L. (2022). Protective effects of lavender oil on sepsis-induced acute lung injury via regulation of the NF-κB pathway. *Pharmaceutical Biology*, 60(1), 968–978. [doi.org/10.1080/13880209.2022.2067570](https://doi.org/10.1080/13880209.2022.2067570)
- Xing, H.; An, L.; Song, Z.; Li, S.; Wang, H.; Wang, C.; Zhang, J.; Tuerhong, M.; Abudukeremu, M.; Li, D.; Lee, D.; Xu, J.; Lall, N.; Guo, Y. (2020). Anti-Inflammatory ent-Kaurane Diterpenoids from *Isodon serra*. *Journal of Natural Products*, 83(10), 2844–2853. <https://doi.org/10.1021/acs.jnatprod.9b01281>
- Xing, J.; Peng, K.; Cao, W.; Lian, X.; Wang, Q.; Wang, X. (2013). Effects of total flavonoids from *Dracocephalum moldavica* on the proliferation, migration, and adhesion molecule expression of rat vascular smooth muscle cells induced by TNF-α. *Pharmaceutical Biology*, 51(1), 74–83. [doi.org/10.3109/13880209.2012.711839](https://doi.org/10.3109/13880209.2012.711839).
- Xu, G.; Peng, L.Y.; Lu, L.; Weng, Z.Y.; Zhao, Y.; Li, X.L.; Zhao, Q.S.; Sun, H.D. 2005. Two New Abietane Diterpenoids from *Salvia yunnanensis*. *Planta Med* 2006; 72: 84±86. DOI 10.1055/s-2005-873184.
- Yan, B.C.; Wang, W.G.; Hu, D.B.; Sun, X.; Kong, L.M.; Li, X.N.; Du, X.; Luo, S.H.; Liu, Y.; Li, Y.; Sun, H.D.; Pu, J.X. (2016). Phomopchalasins A and B, Two Cytochalasans with Polycyclic-Fused Skeletons from the Endophytic Fungus *Phomopsis* sp. *Organic Letters*, 18(5), 1108–1111. [doi.org/10.1021/acs.orglett.6b00214](https://doi.org/10.1021/acs.orglett.6b00214)

- Yan, D. (2016). Substitutability of *Prunella vulgaris* L. stem, leaf and ear based on HPLC-ESI-MS analysis and anti-inflammatory and antioxidant activity. *Chinese Pharmaceutical Journal*, 24, 792–797. [pesquisa.bvsalud.org/portal/resource/pt/wpr-859105](http://pesquisa.bvsalud.org/portal/resource/pt/wpr-859105)
- Yang, E.-L.; Hou, Y.; Ma, G.-X.; Zou, L.-J.; Xu, X.-D.; Wu, H.-F.; Yang, J.-S.; Wei, H.-W.; Fan, C.-Z.; Sun, Z.-C.; Shi, L.-L. (2022). Abietane-Type diterpenoids from *Nepeta bracteata* Benth. and their anti-inflammatory activity. *Frontiers in Chemistry*, 10, 944972. doi: 10.3389/fchem.2022.944972.
- Yang, F.; Pu, H.-Y.; Yaseen, A., Chen, B., Li, F. Gu, Y.-Ch., Shen, X.-F., Wang, M.-K. Guo, D.-L., Wang, L. (2021). Terpenoid and phenolic derivatives from the aerial parts of *Elsholtzia rugulosa* and their anti-inflammatory activity. *Phytochemistry*, 181: 112543. <https://doi.org/10.1016/j.phytochem.2020.112543>.
- Yang, N.; Zou, C.; Luo, W.; Xu, D.; Wang, M.; Wang, Y.; Wu, G.; Shan, P.; Liang, G. (2022). Sclareol attenuates angiotensin II -induced cardiac remodeling and inflammation via inhibiting MAPK signaling. *Phytotherapy Research*, 1-14 doi.org/10.1002/ptr.7635
- Yang, Y.; Wang, Z.-P.; Gao, S.-H.; ...Zhong, R.-Q.; Chen, W.-S. (2017). The effects of *Salvia przewalskii* total phenolic acid extract on immune complex glomerulonephritis. *Pharmaceutical Biology*, 55(1), pp. 2153–2160.
- Yang, Z.; Qi, J.; Ping, D.; Sun, X.; Tao, Y.; Liu, C.; Peng, Y. (2022). *Salvia miltiorrhiza* in thorax and abdominal organ fibrosis: A review of its pharmacology. *Frontiers in Pharmacology* (Vol. 13). *Frontiers Media S.A.* doi.org/10.3389/fphar.2022.999604.
- Yazbek, P.B.; Tezoto, L.; Cassas, F.; Rodrigues, E. 2016. Review Plants used during maternity, menstrual cycle and other women's health conditions among Brazilian cultures. *Journal of Ethnopharmacology* 179 (2016) 310–331. [dx.doi.org/10.1016/j.jep.2015.12.054](https://doi.org/10.1016/j.jep.2015.12.054)
- Yi, W.; Chen, R.; Xie, F.; Xu, C.; Tian, W. (2022). Anti-inflammatory and immunomodulatory properties of *Mentha piperita* green-formulated gold nanoparticles and its effect on ovalbumin-induced asthma and lung pathological changes in rats. *Journal of Experimental Nanoscience*, 17(1), 163–172. doi.org/10.1080/17458080.2022.2033730
- Yin, Q.-Q.; Liu, C.-X.; Wu, Y.-L.; Wu, S.-F.; Wang, Y.; Zhang, X.; Hu, X.-J.; Pu, J.-X.; Lu, Y.; Zhou, H.-C.; Wang, H.-L.; Nie, H.; Sun, H.-D.; Chen, G.-Q. (2013). Preventive and Therapeutic Effects of Adenanthin on Experimental Autoimmune Encephalomyelitis by Inhibiting NF-κB Signaling. *The Journal of Immunology*, 191(5), 2115–2125. doi.org/10.4049/jimmunol.1203546
- Yu, Y.; Xing, N.; Xu, X.; ...Sun, G.; Sun, X. (2019). Tournefoliac acid B, derived from *Clinopodium chinense* (Benth.) Kuntze protects against myocardial ischemia/reperfusion injury by inhibiting endoplasmic reticulum stress-regulated apoptosis via PI3K/AKT pathways. *Phytomedicine*, 52, pp. 178–186.

- Yu, Z.-Y.; Liang, Y.-G.; Xiao, H.; Shan, Y.-J.; Dong, B.; Huang, R.; Fu, Y.-L.; Zhao, Z.-H.; Liu, Z.-Y.; Zhao, Q.-S.; Wang, S.-Q.; Chen, J.-P.; Mao, B.-Z.; Cong, Y.-W. (2007). Melissoidesin G, a diterpenoid purified from *Isodon melissoides*, induces leukemic-cell apoptosis through induction of redox imbalance and exhibits synergy with other anticancer agents. *International Journal of Cancer*, 121, 2084–2094. doi: 10.1002/ijc.22945.
- Yuan, F.; Liu, R.; Hu, M.; Sun, Y.; He, J. JAX2, an ethanol extract of *Hyssopus cuspidatus* Boriss., can prevent bronchial asthma by inhibiting MAPK/NF-κB inflammatory signaling. *Phytomedicine*, 57, pp. 305–314.
- Zam, W.; Quispe, C.; Sharifi-Rad, J.; López, M.D.; Schoebitz, M.; Martorell, M.; Sharopov, F.; Fokou, P.V.T.; Mishra, A.P.; Chandran, D.; Kumar, M.; Chen, J.T.; Pezzani, R. (2022). An Updated Review on The Properties of *Melissa officinalis* L.: Not Exclusively Anti-anxiety. In *Frontiers in bioscience* 14(2). doi.org/10.31083/j.fbs1402016
- Zargar, O.A.; Bashir, R.; Ganie, S.A.; Hamid, R. (2019). The effect of *Elsholtzia densa* methanolic extract modulates inflammation in vitro and in vivo. *Oriental Pharmacy and Experimental Medicine*, 19(1), 49–58. doi.org/10.1007/s13596-018-0346-6.
- Zarshenas, M.M.; Krenn, L. (2015). Phytochemical and pharmacological aspects of *Salvia mirzayanii* Rech. f. Esfand. *Journal of Evidence-Based Complementary and Alternative Medicine*, 20(1), 65–72. https://doi.org/10.1177/2156587214553938
- Zengin, G.; Ferrante, C.; Orlando, G.; Zheleva-Dimitrova, D.; Gevrenova, R.; Recinella, L.; Chiavaroli, A.; Leone, S.; Brunetti, L.; Aumeeruddy, M.Z.; Aktumsek, A.; Mahomoodally, M.F. Angelini, P.; Covino, S.; Venanzoni, R.; Tirillini, B.; Menghini, L. (2019). Chemical profiling and pharmaco-toxicological activity of *Origanum sipyleum* extracts: Exploring for novel sources for potential therapeutic agents. *Journal of Food Biochemistry*, 43, e13003. doi: https://doi.org/10.1111/jfbc.13003.
- Zhang, J.; Yan, X.; Xu, S.; Wang, D.; Liu, H. (2021) High-performance thin-layer chromatographic quantification of four active compounds in total flavonoids of *Ziziphora clinopodioides* Lam. and TLC–DPPH test for screening antioxidant components. *JPC-J Planar Chromat* 34, 481–492. doi.org/10.1007/s00764-021-00147-z
- Zhang, L.G.; Yu, Z.Q.; Yang, C.; Chen, J.; Zhan, C.S.; Chen, X.G.; Zhang, L.; Hao, Z.Y.; Liang, C.Z. (2020). Effect of Eriocalyxin B on prostatic inflammation and pelvic pain in a mouse model of experimental autoimmune prostatitis. *The Prostate*, 80(16), 1394–1404. doi.org/10.1002/pros.24065
- Zhang, M.; Chen, M.; Hou, Y.; Fan, C.; Wei, H.; Shi, L.; Ma, G.; Zhang, J. (2021). Inflammatory and cytotoxic activities of Abietane terpenoids from *Nepeta bracteata* Benth.. *Molecules*, 26, 5603. https://doi.org/10.3390/molecules26185603.
- Zhang, M.; Hwang, E.; Lin, P.; Gao, W.; Ngo, H.T.T.; Yi, T.H. (2018b). *Prunella vulgaris* L. Exerts a Protective Effect Against Extrinsic Aging Through NF-κB, MAPKs, AP-1, and TGF-β/Smad Signaling Pathways in UVB-Aged Normal Human Dermal Fibroblasts. *Rejuvenation Research*, 21(4), 313–322. doi.org/10.1089/rej.2017.1971

- Zhang, Q.Y.; Yan, B.C.; Hu, K.; Li, X.N.; Sun, H.D.; Puno, P.T. (2020b). Isorugosiformins A–F, six ent-kaurane diterpenoids from *Isodon rugosiformis*. *Fitoterapia*, 142. doi.org/10.1016/j.fitote.2020.104529
- Zhang, Q.; Porto, N.M.; Guilhon, C.C.; ...Fernandes, P.D.; Boylan, F. (2021). Pharmacognostic study on *Elsholtzia ciliata* (Thumb.) Hyl.: Anatomy, phytochemistry and pharmacological activities. *Pharmaceuticals*, 14(11), 1152.
- Zhang, Y.Y.; Jiang, H.Y.; Liu, M.; Hu, K.; Wang, W.G.; Du, X.; Li, X.N.; Pu, J.X.; Sun, H.D. (2017). Bioactive ent-kaurane diterpenoids from *Isodon rubescens*. *Phytochemistry*, 143, 199–207. doi.org/10.1016/j.phytochem.2017.08.009
- Zhang, Y.; Liu, J.; Jia, W.; Zhao, A.; Zhang, T.L.; Liu, Y.; Jia, J.; Zhao, W.; Li, A. (2005). Distinct immunosuppressive effect by *Isodon serra* extracts. *International Immunopharmacology*, (Vol. 5). <http://www.sciencedirect.com/science/article/pii/S1567576905001803>
- Zhang, Y.; Wang, K.; Chen, H.; He, R.; Cai, R.; Li, J.; Zhou, D.; Liu, W.; Huang, X.; Yang, R.; Deng, S.; Li, J.; Guan, X. (2018). Anti-inflammatory lignans and phenylethanoid glycosides from the root of *Isodon ternifolius* (D.Don) Kudô. *Phytochemistry*, 153, 36–47. doi.org/10.1016/j.phytochem.2018.05.017
- Zhao, J.; Xu, F.; He, J.H.; Gu, Z.Y.; Ma, L. (2013). [Study on chemical constituents of *Hyssopus cuspidatus*. Zhong yao cai = Zhongyaocai = *Journal of Chinese medicinal materials*, 36(1), pp. 54–57.
- Zhao, J.; Xu, F.; Huang, H.; Ji, T.; Li, C.; Tan, W.; Chen, Y. (2015). Evaluation on bioactivities of total flavonoids from *Lavandula angustifolia*. *Pakistan Journal of Pharmaceutical Sciences*, 28(4), 1245–1251. pubmed-ncbi-nlm-nih-gov.pbidi.unam.mx:2443/26142514/
- Zhao, J.; Xu, L.; Jin, D.; Xin, Y.; Tian, L.; Wang, T.; Zhao, D.; Wang, Z.; Wang, J. 2022. Rosmarinic acid and related dietary supplements: potential applications in the prevention and treatment of Cancer. *Biomolecules*, 12, 1410. <https://doi.org/10.3390/biom12101410>
- Zheng, S.; Lu, J.; Shen, T.; Liut, H.; Shen, X. (2001). New C-methylated flavones from *Elsholtzia blanda* Benth. *Indian Journal of Chemistry*, 408(B), 232–234.
- Zheng, X.Q.; Song, L.X.; Qiu, H.; Yang, Y.B.; Han, Z.Z.; Wang, Z.T.; Gu, L.H. (2022). Novel phenolic and diterpenoid compounds isolated from the fruit spikes of *Prunella vulgaris* L. and their anti-inflammatory activities. *Phytochemistry Letters*, 49, 60–64. doi.org/10.1016/j.phytol.2022.03.005
- Zhong, J.; Muhammad, N.; Yang, X.; Li, J. (2022). Antimicrobial, antioxidant, anti-inflammatory activities of eight essential oils obtained from traditional chinese medicines using supercritical fluid extraction coupled molecular distillation. *Journal of Essential Oil-Bear Plants* 25 (5) 1145 – 1158.

- Zhong, J.; Muhammad, N.; Yang, X.; Li, J. (2022). Antimicrobial, antioxidant, anti-inflammatory activities of eight essential oils obtained from traditional Chinese medicines using supercritical fluid extraction coupled molecular distillation. *Journal of Essential Oil Bearing Plants*, 25:5, 1145-1158, doi: 10.1080/0972060X.2022.2142484.
- Zhong, Y.; Huang, Y.; Santoso, M.B.; Wu, L.D. (2015). Sclareol exerts anti-osteoarthritic activities in interleukin-1 $\beta$ -induced rabbit chondrocytes and a rabbit osteoarthritis model. *International Journal of Clinical and Experimental Pathology* 8(3), 2365-2374.
- Zhou, L.; Sun, L.; Wu, H.; Zhang, L.; Chen, M.; Liu, J.; Zhong, R. (2013). Oridonin ameliorates lupus-like symptoms of MRLlpr/lpr mice by inhibition of B-cell activating factor (BAFF). *European Journal of Pharmacology*, 715(1–3), 230–237. <https://doi.org/10.1016/j.ejphar.2013.05.016>
- Zhu, C.-S.; Liu, K.; Wang, J.-L.; Li, J.-F.; Liu, M.-F.; Hao, N.; Lin, Y.-X.; Xiao, Z.-F. (2018). Antioxidant activities and hepatoprotective potential of *Dracocephalum rupestre* Hance extract against CCl<sub>4</sub>-induced hepatotoxicity in Kunming mice. *Journal of Food Biochemistry*, 42:e12484. <https://doi.org/10.1111/jfbc.12484>
- Ziaei, A.; Hoppstädter, J.; Kiemer, A. K.; Ramezani, M.; Amirghofran, Z.; Diesel, B. (2015). Inhibitory effects of teuclatriol, a sesquiterpene from *Salvia mirzayanii*, on nuclear factor- $\kappa$ B activation and expression of inflammatory mediators. *Journal of Ethnopharmacology*, 160, 94–100. <https://doi.org/10.1016/j.jep.2014.10.041>
- Zotsenko, L.; Kyslychenko, V.; Kalko, K.; Drogovoz, S. (2021). The study of phenolic composition and acute toxicity, anti-inflammatory and analgesic effects of dry extracts of some *Elsholtzia* genus (Lamiaceae) species. *Archives*, 2, 637–649. <http://pharmacologyonline.silae.it>
- Zou, Y.H.; Zhao, L.; Xu, Y.K.; Bao, J.M.; Liu, X.; Zhang, J.S.; Li, W.; Ahmed, A.; Yin, S.; Tang, G.H. (2018). Anti-inflammatory sesquiterpenoids from the Traditional Chinese Medicine *Salvia plebeia*: Regulates pro-inflammatory mediators through inhibition of NF- $\kappa$ B and Erk1/2 signaling pathways in LPS-induced Raw 264.7 cells. *Journal of Ethnopharmacology*, 210, 95–106. [doi.org/10.1016/j.jep.2017.08.034](https://doi.org/10.1016/j.jep.2017.08.034)
- Zou, Z.Q.; Ning, D.S.; Liu, Y.; Fu, Y.X.; Li, L.C.; Pan, Z.H. (2022). Five new germacrane sesquiterpenes with anti-inflammatory activity from *Salvia petrophila*. *Phytochemistry Letters*, 47, 111–114. [doi.org/10.1016/j.phytol.2021.12.001](https://doi.org/10.1016/j.phytol.2021.12.001)
- Zoubi, Y.E.; El, L.; Sidi, M.; Ben, M.; Boukhira, S.; Ben, S.M.; Farah, A. (2016). Phytochemical Screening, Anti-inflammatory Activity and Acute Toxicity of Hydro-ethanolic, Flavonoid, Tannin and Mucilage Extracts of *Lavandula stoechas* L. from Morocco Valorisation des plantes médicinales View project pharmacological activities of plants extracts View project. *Article in International Journal of Pharmacognosy and Phytochemical Research* 8(1), 31-37.[www.researchgate.net/publication/287935765](http://www.researchgate.net/publication/287935765)
- Zuo, J.; Zhang, T.H.; Xiong, L.; Huang, L.; Peng, C.; Zhou, Q.M.; Dai, O. (2022). Two Pairs of 7,7'-Cyclolignan Enantiomers with Anti-Inflammatory Activities from *Perilla frutescens*. *Molecules*, 27(18). [doi.org/10.3390/molecules27186102](https://doi.org/10.3390/molecules27186102)

- Zuzarte, M.; Francisco, V.; Neves, B.; Liberal, J.; Cavaleiro, C.; Canhoto, J.; Salgueiro, L.; Cruz, M.T. (2022). *Lavandula viridis* L'Hér. Essential Oil Inhibits the Inflammatory Response in Macrophages Through Blockade of NF-KB Signaling Cascade. *Front. Pharmacol.* 12:695911. doi: 10.3389/fphar.2021.695911
- Zuzarte, M.; Alves-Silva, J.M.; Alves, M.; ...Salgueiro, L.; Cruz, M.T. (2018). New insights on the anti-inflammatory potential and safety profile of *Thymus carnosus* and *Thymus camphoratus* essential oils and their main compounds. *Journal of Ethnopharmacology*, 2018, 225, pp. 10–17
- Zuzarte, M.; Gonçalves, M.J.; Cavaleiro, C.; Cruz, M.T.; Benzarti, A.; Marongiu, B.; Maxia, A.; Piras, A.; Salgueiro, L. (2013). Antifungal and anti-inflammatory potential of *Lavandula stoechas* and *Thymus herbabarona* essential oils. *Industrial Crops and Products*, 44, 97–103. doi.org/10.1016/j.indcrop.2012.11.002.
- Zuzarte, M.; Sousa, C.; Cavaleiro, C.; Cruz, M.T.; Salgueiro, L. (2022). The Anti-Inflammatory Response of *Lavandula luisieri* and *Lavandula pedunculata*. Essential Oils. *Plants*, 2022, 11(3), 370.
